# Supplementary material for: LTR retroelement expansion of the human cancer transcriptome and immunopeptidome revealed by de novo transcript assembly
Source: PubMed Central journal article supplement (PMC6771403; doi:10.1101/gr.248922.119), 2019-10
Supplement: supp_gr.248922.119_Supplemental_Figures.pdf [file supp_gr.248922.119_Supplemental_Figures.pdf]

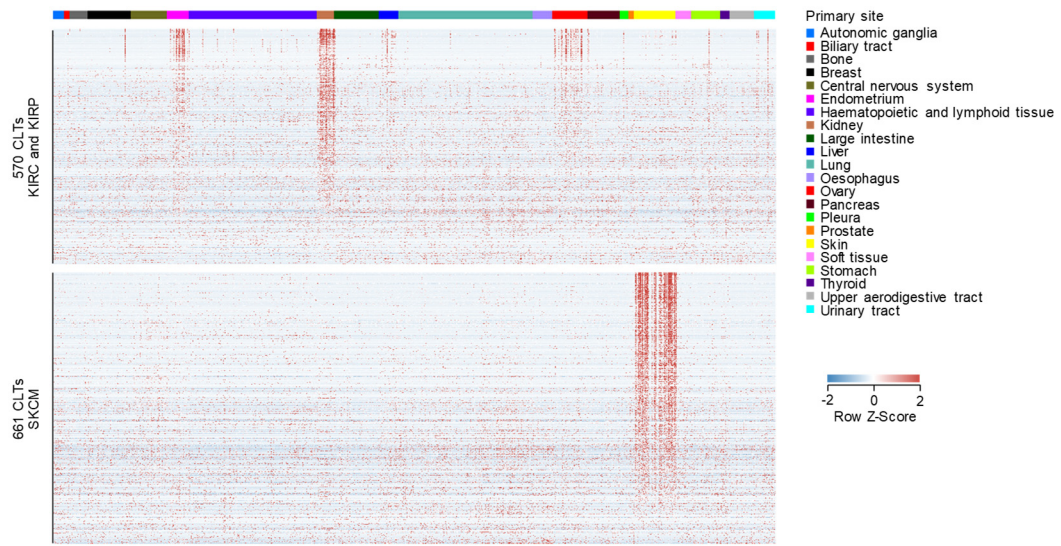

**Supplemental Fig S1 Cancer histotype specificity of CLTs expression in cancer cell lines.** Heatmap of expression values of 570 CLTs specific to KIRC or KIRP (*top*) and 661 CLTs specific to SKCM (*bottom*) in 935 CCLE cell lines of the indicated histotype.

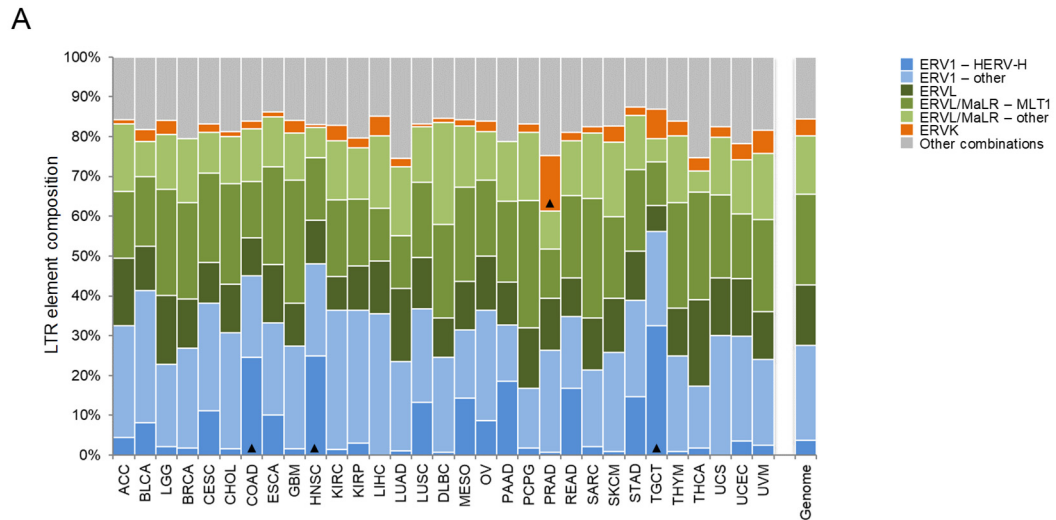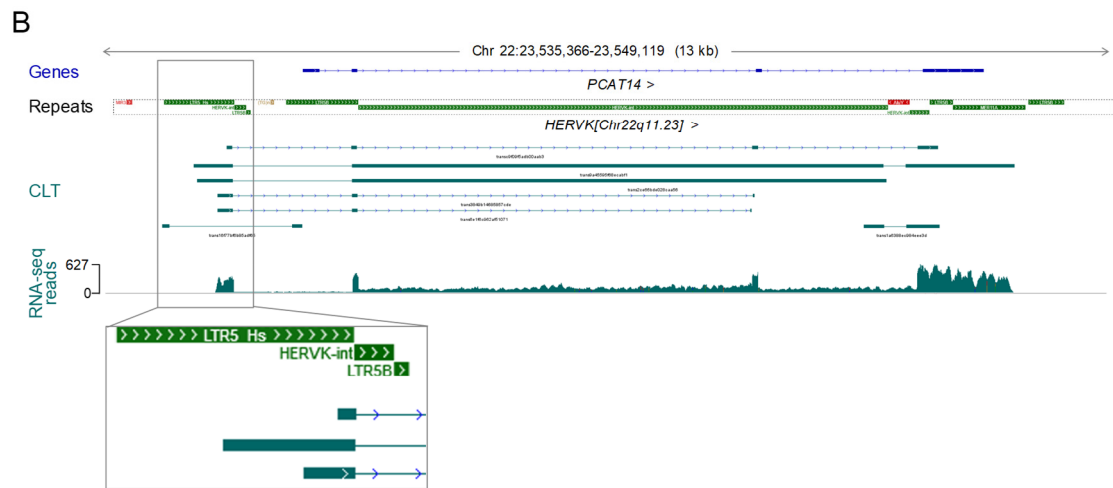

**Supplemental Fig S2 LTR element composition of CLTs.** (A) Stack bars indicate the percentage of LTR element families of CLTs expressed in the indicated cancer type, in comparison with their representation in the genome. Black triangles indicate over-represented families. (B) GENCODE annotated transcripts at the *PCAT14* genomic location (Genes), repeat content (Repeats), indicating the genomic structure of provirus *HERVK[Chr22q11.23]*, structure of several transcripts spanning that locus in the current assembly (CLT) and RNA-seq trace of a representative PRAD sample.

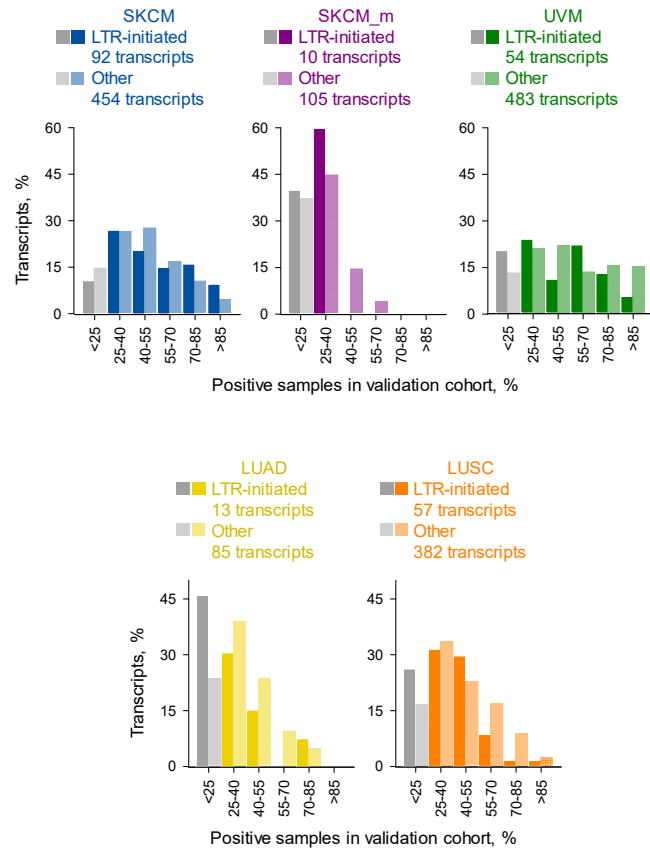

**Supplemental Fig S3 Validation of CLT expression prevalence according to LTR position.** Percentage of LTR-initiated and remaining CLTs, expressed in each bin of percentage of positive samples in cohorts of primary SKCM (n=77), metastatic SKCM (SKCM\_m; n=318), UVM (n=31), LUAD (n=395) or LUSC (n=338). Samples were considered positive if transcript expression level was more than three times that of the highest median in any normal tissue.

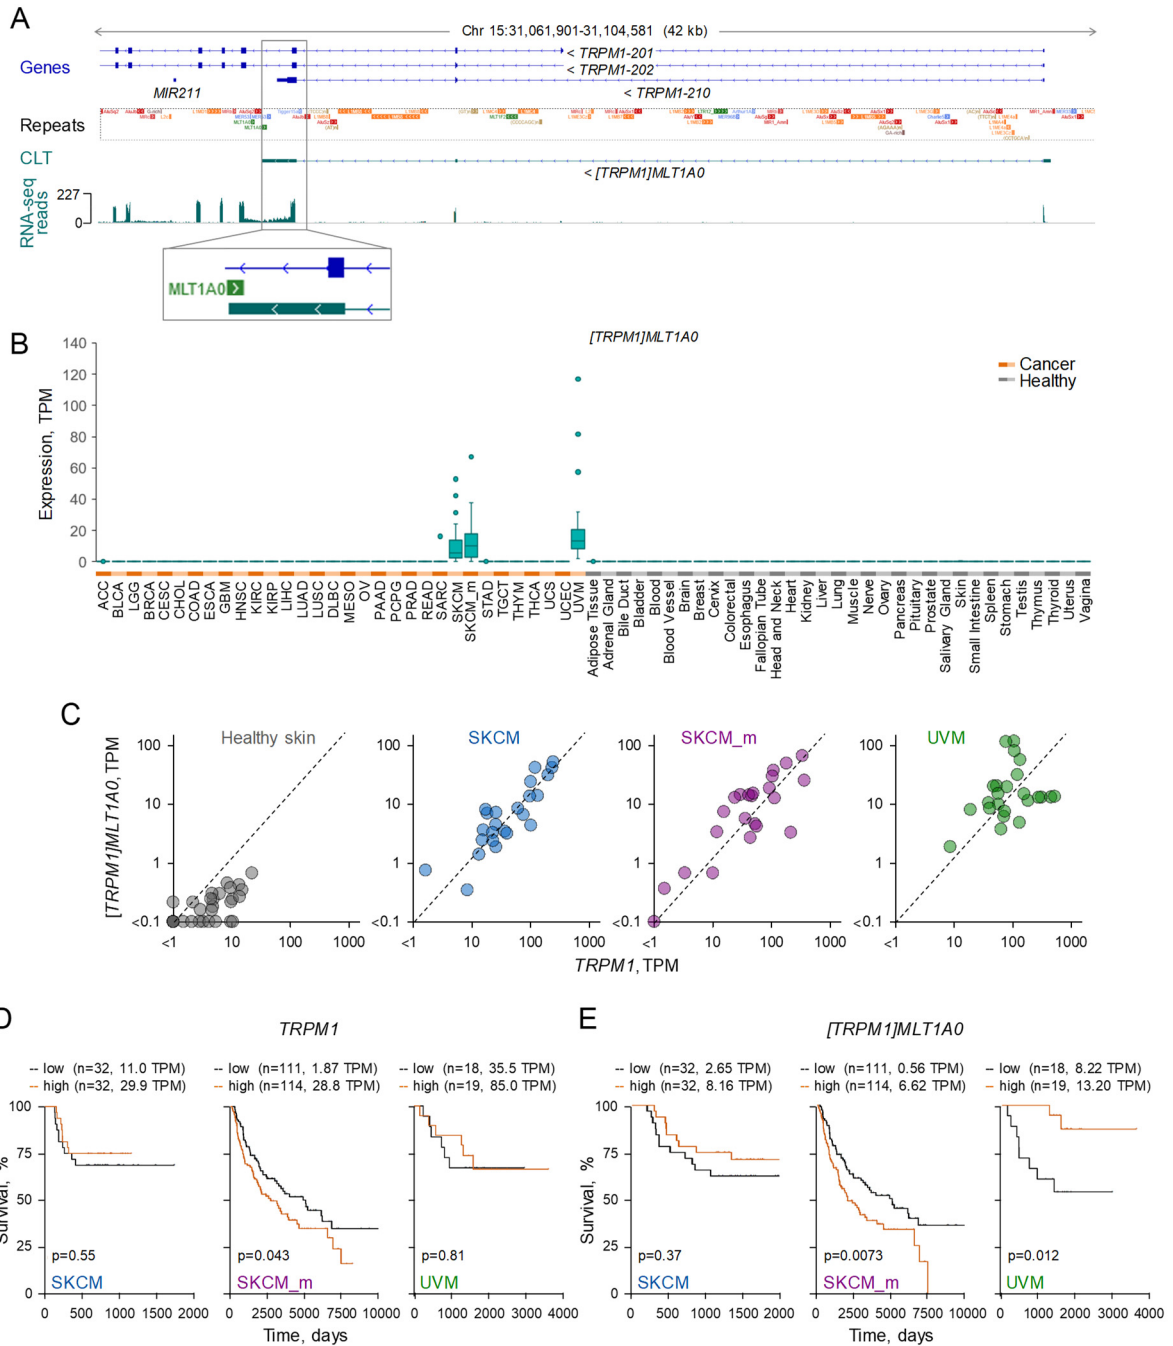

**Supplemental Fig S4 Truncated *TRPM1* transcript created by alternative splicing and MaLR element exonisation. (A)** GENCODE annotated transcripts at the indicated genomic location (Genes), repeat content (Repeats), structure of the *[TRPM1]MLT1A0* transcript in the current assembly (CLT) and RNA-seq trace of a representative SKCM sample. **(B)** Box plot of *[TRPM1]MLT1A0* expression in cancer patient and healthy control samples. **(C)** Correlation of *TRPM1* and *[TRPM1]MLT1A0* expression (TPM values). Each symbol is an individual patient or healthy control sample. **(D, E)** Kaplan-Meier plots and p-values from log-rank tests for melanoma patients stratified according to the higher versus the lower expression tertiles for *TRPM1* (D) and *[TRPM1]MLT1A0* (E). The number of cases and the expression thresholds are also indicated in brackets.

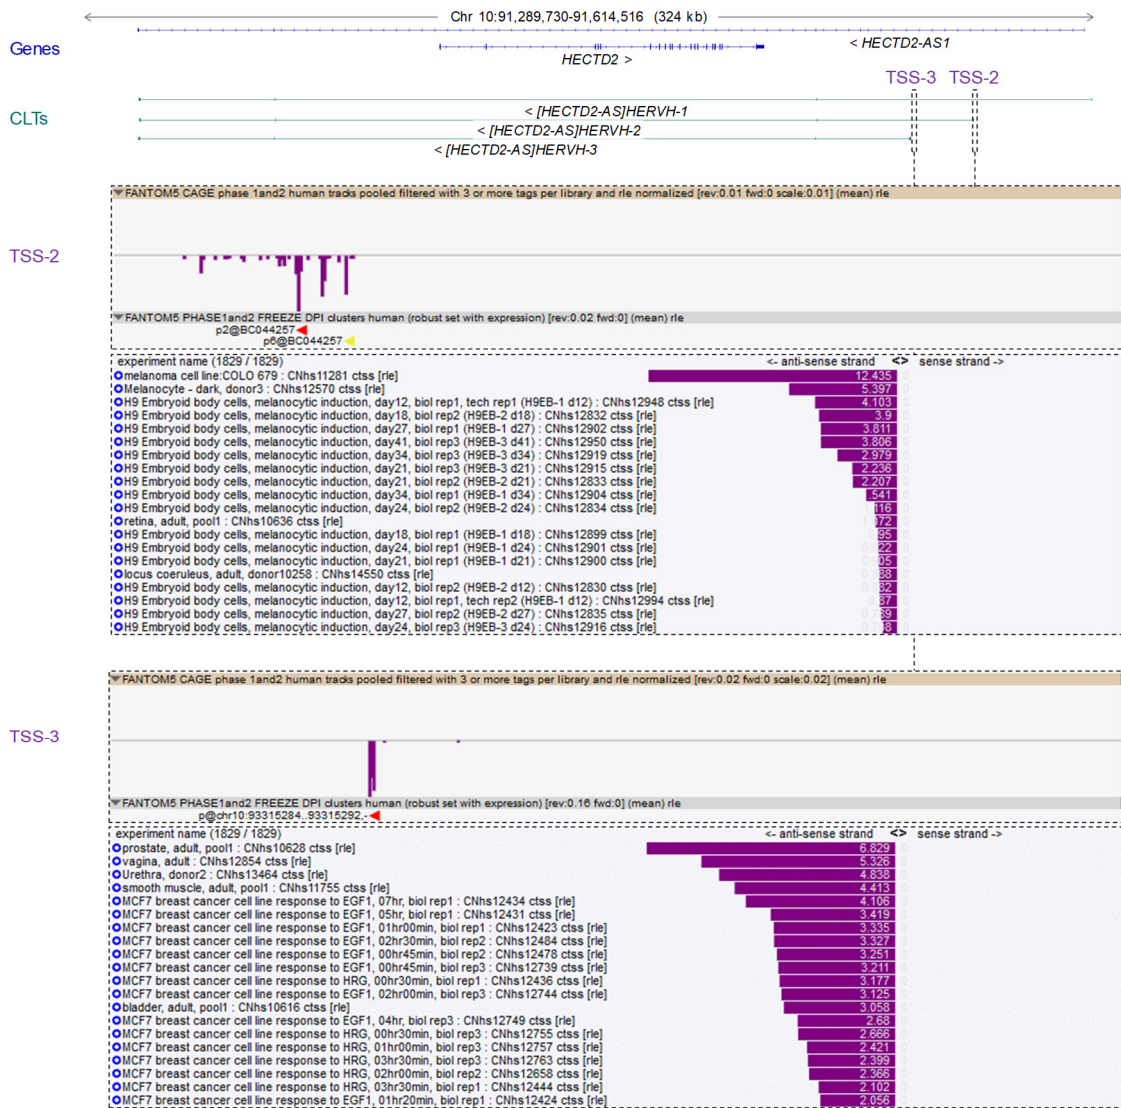

**Supplemental Fig S5 CAGE support for transcription start sites of antisense transcripts at the *HECTD2* locus.** Normalized data from the FANTOM Consortium and the RIKEN PMI and CLST (DGT) for transcription start sites 2 (TSS-2) and 3 (TSS-3) (both depicted in 1.4 Kb intervals), initiating transcripts [*HECTD2-AS*]HERVH-2 and [*HECTD2-AS*]HERVH-3, respectively.

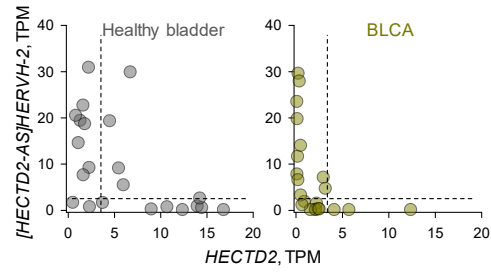

**Supplemental Fig S6 Anti-correlation *HECTD2* and *[HECTD2-AS]HERVH-2* expression BLCA and normal bladder samples.** Plotted are the TPM values for each sample. Each symbol is an individual patient or healthy control sample.

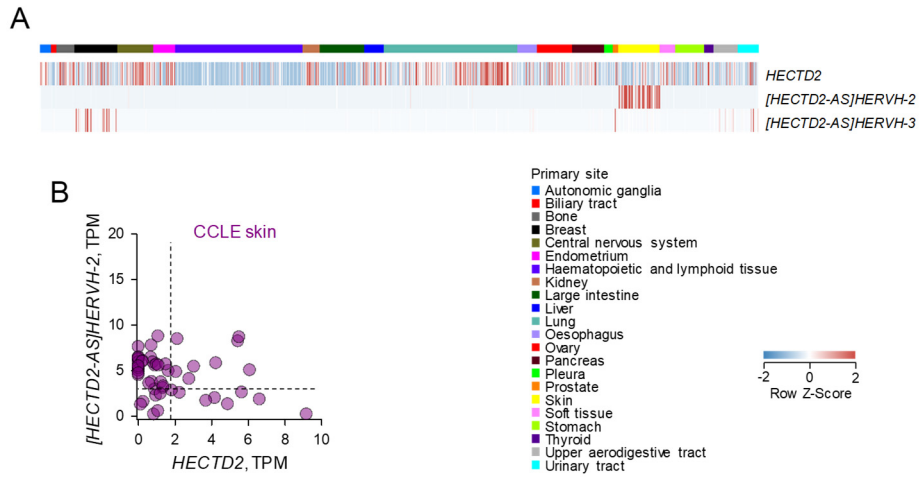

**Supplemental Fig S7 Expression of *HECTD2* and of the antisense transcripts in cancer cell lines. (A)** Heatmap of expression values of *HECTD2*, [*HECTD2-AS*]HERVH-2 and [*HECTD2-AS*]HERVH-3, in 935 CCL cell lines of the indicated histotype. **(B)** Anti-correlation *HECTD2* and [*HECTD2-AS*]HERVH-2 expression (TPM values) in the same cells lines. Each symbol is an individual cell line.

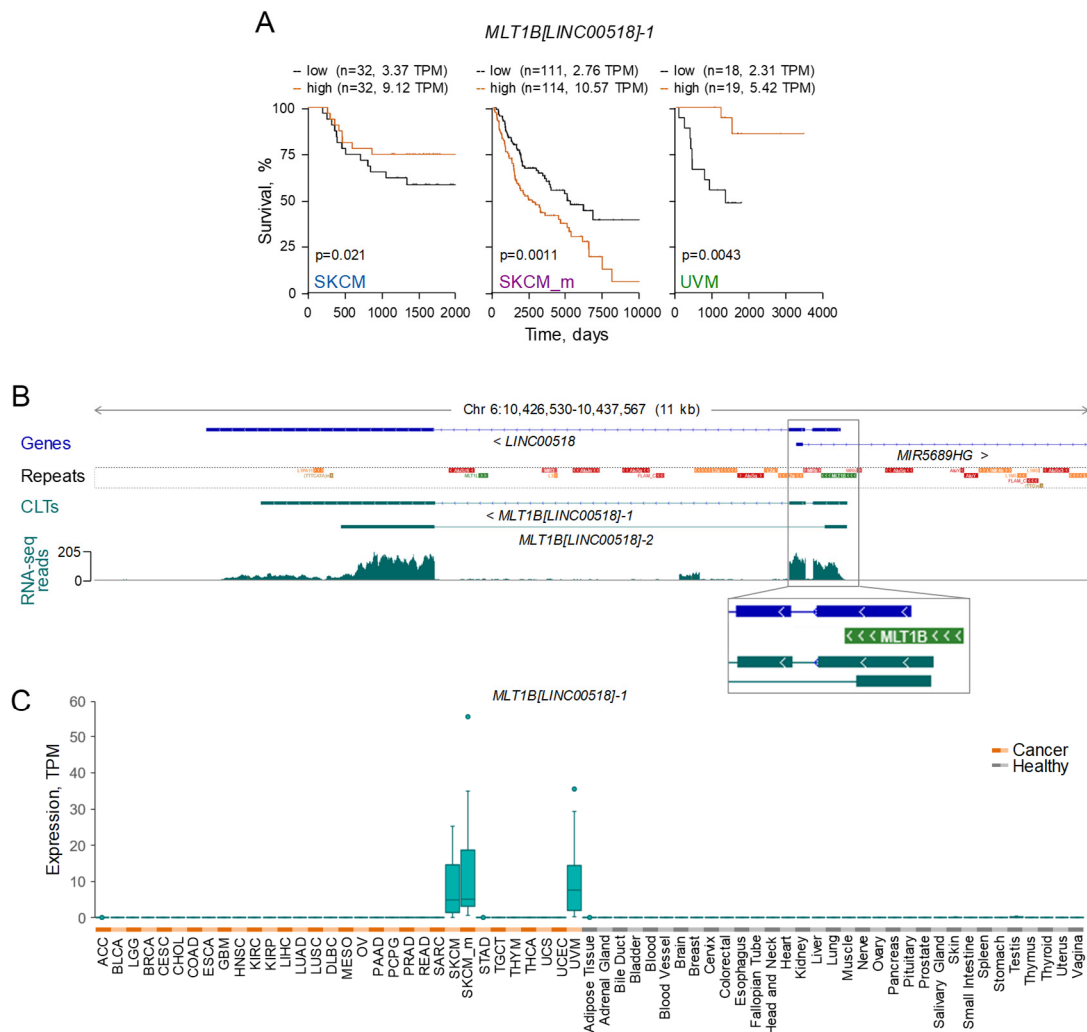

**Supplemental Fig S8 Expression and prognostic properties of *MLT1B[LINC00518]-1* in melanoma.** (A) Kaplan-Meier plots and p-values from log-rank tests for melanoma patients stratified according to the higher versus the lower expression tertiles for *MLT1B[LINC00518]-1*. The number of cases and the expression thresholds are also indicated in brackets. (B) GENCODE annotated transcripts at the indicated genomic location (Genes), repeat content (Repeats), structure of two CLTs in the current assembly (CLTs) and RNA-seq trace of a representative SKCM sample. (C) Box plot of *MLT1B[LINC00518]-1* expression in cancer patient and healthy control samples.



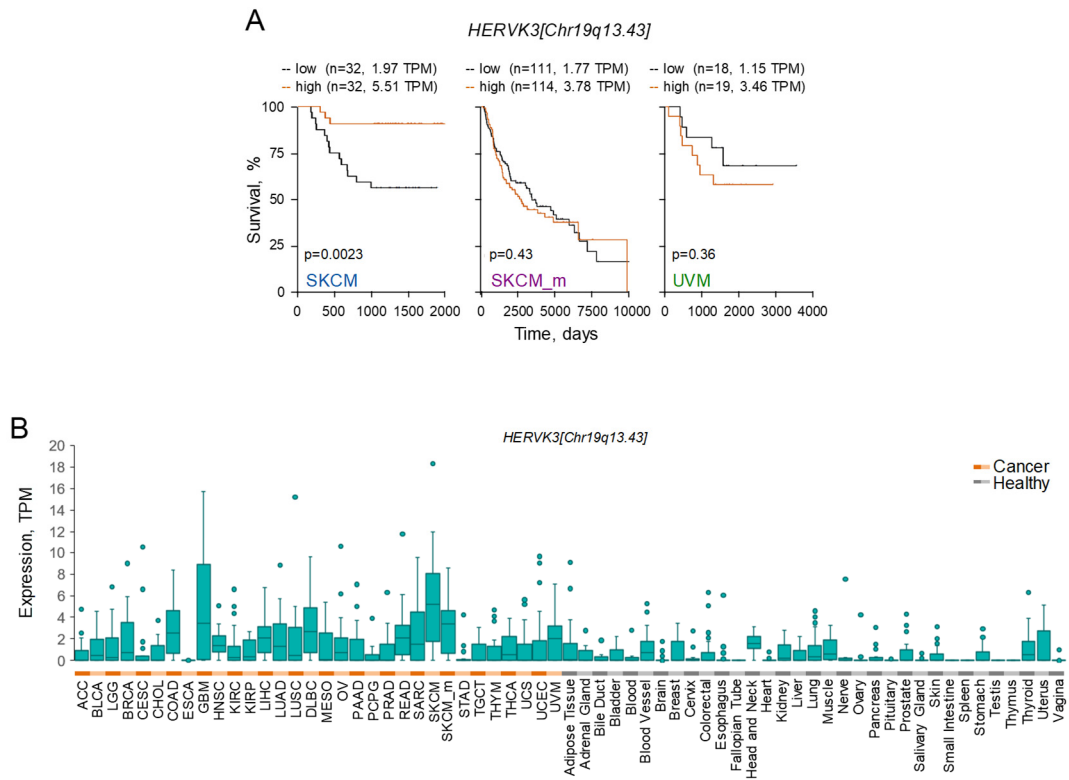

**Supplemental Fig S9 Expression and prognostic properties of *HERVK3[Chr19q13.43]* in melanoma.** (A) Kaplan-Meier plots and p-values from log-rank tests for melanoma patients stratified according to the higher versus the lower expression tertiles for *HERVK3[Chr19q13.43]*. The number of cases and the expression thresholds are also indicated in brackets. (B) Box plot of *HERVK3[Chr19q13.43]* expression in cancer patient and healthy control samples.

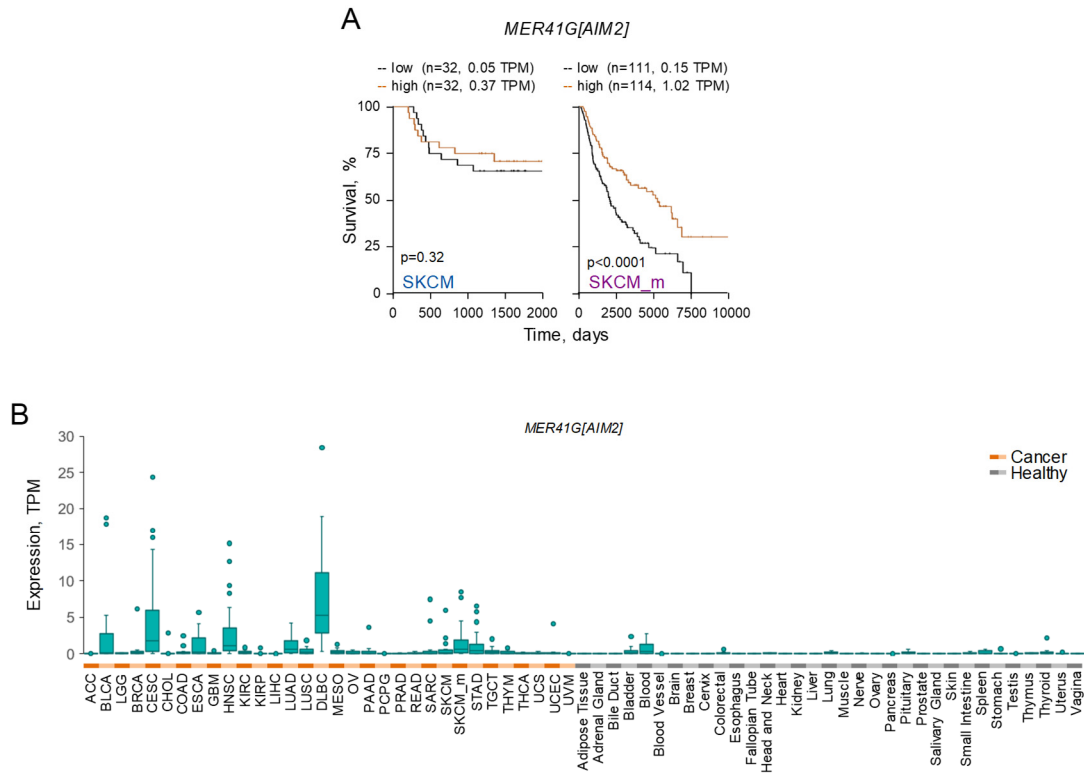

**Supplemental Fig S10 Expression and prognostic properties of *MER41G[AIM2]* in melanoma. (A)** Kaplan-Meier plots and p-values from log-rank tests for SKCM patients stratified according to the higher versus the lower expression tertiles for *MER41G[AIM2]*. The number of cases and the expression thresholds are also indicated in brackets. No association was observed in UVM due to lack of expression. **(B)** Box plot of *MER41G[AIM2]* expression in cancer patient and healthy control samples.



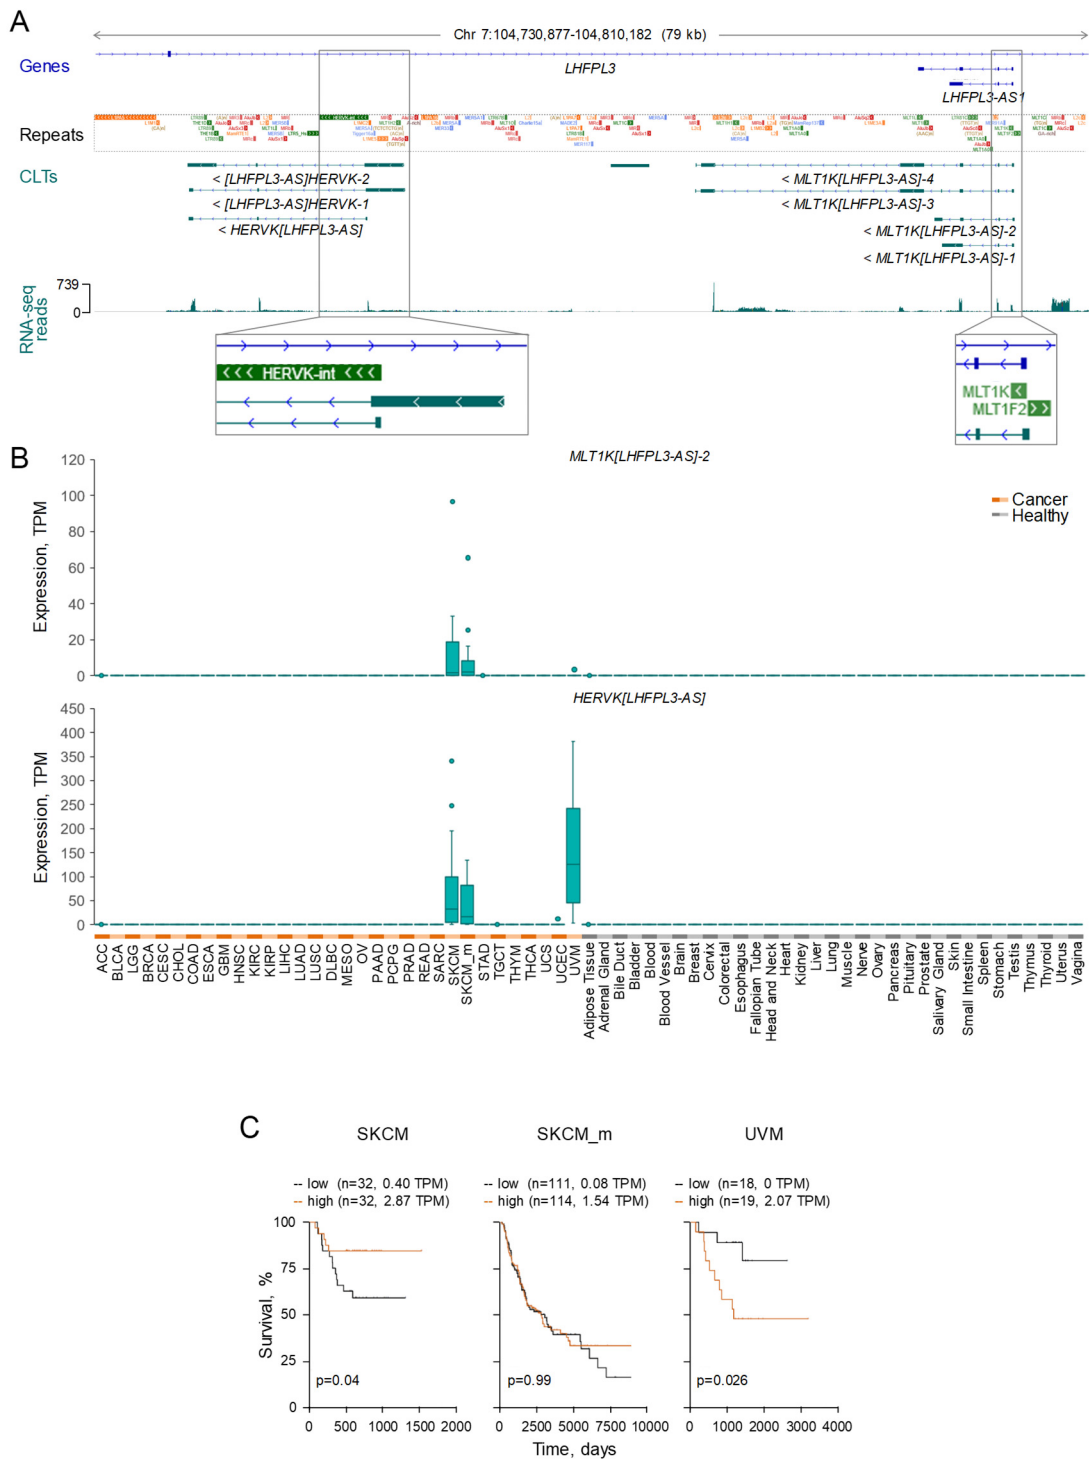

**Supplemental Fig S12 Expression and prognostic properties of CLTs at the *LHFPL3* locus in melanoma.** (A) GENCODE annotated transcripts at the indicated genomic location (Genes), repeat content (Repeats), structure of indicated CLTs at the *LHFPL3* locus in the current assembly (CLTs) and RNA-seq trace of a representative SKCM sample. (B) Box plot of *MLT1K[LHFPL3-AS]-2* or *HERVK[LHFPL3-AS]* expression in cancer patient and healthy control samples. (C) Kaplan-Meier plots and p-values from log-rank tests for melanoma patients stratified according to the higher versus the lower expression tertiles for *LHFPL3*.

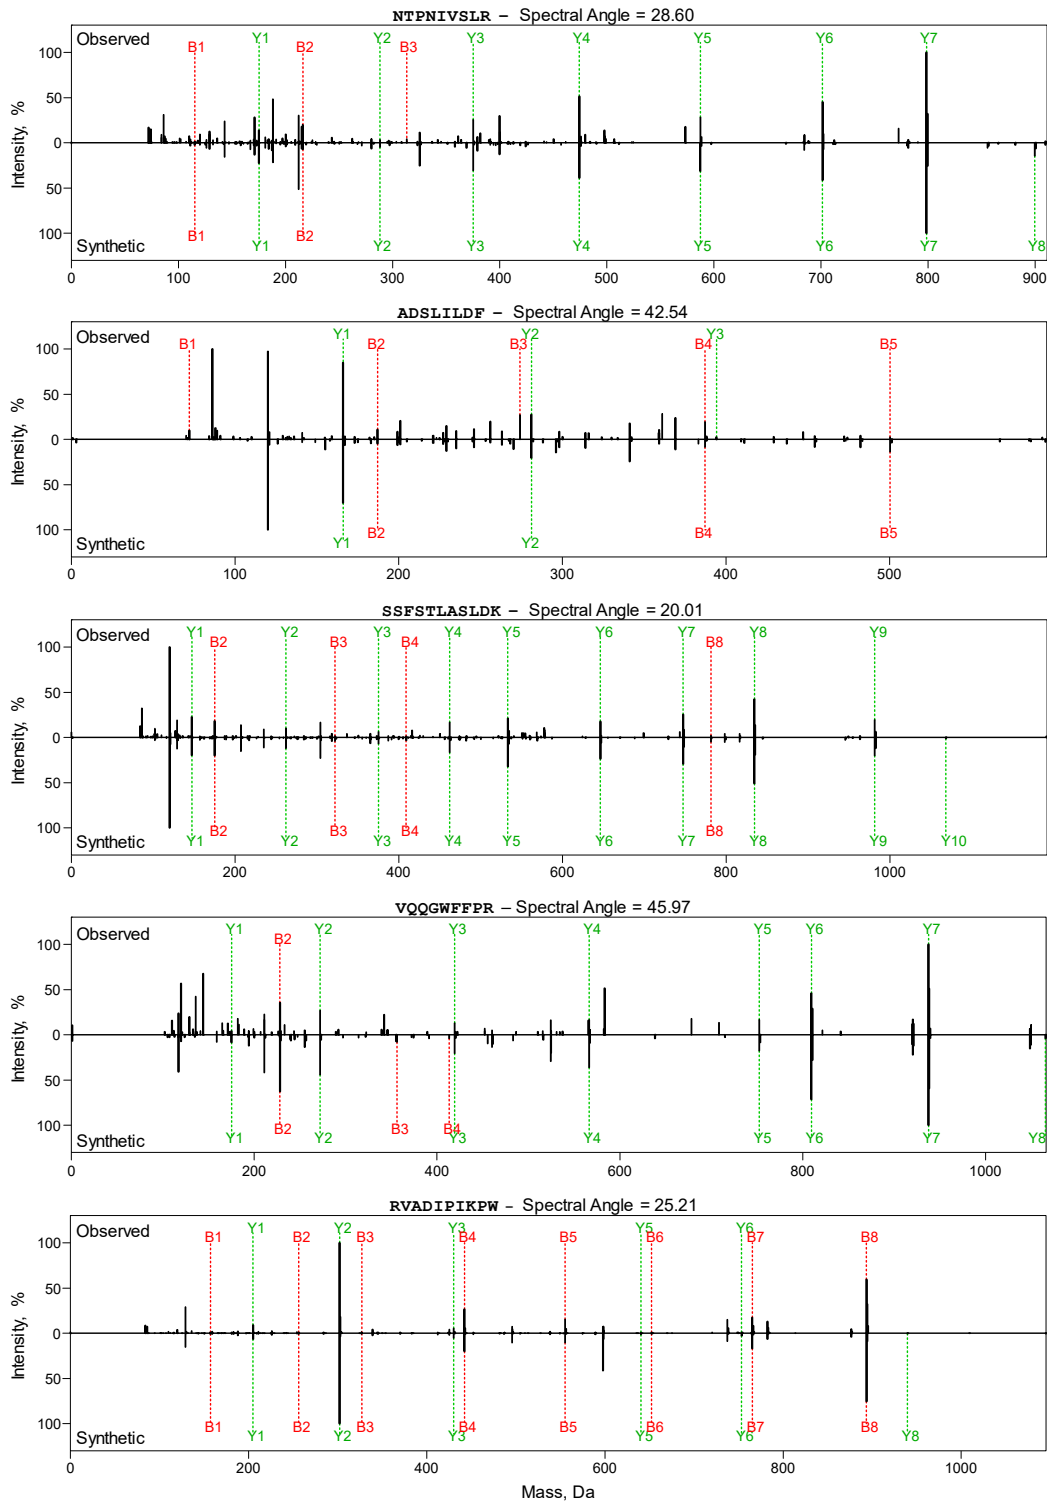

**Supplemental Fig S13 Validation of identified peptides with synthetic peptides.** Mirror plots of mass spectra corresponding to observed (*top*) and synthetic (*bottom*) peptides of the same sequence. Product ions are also indicated.

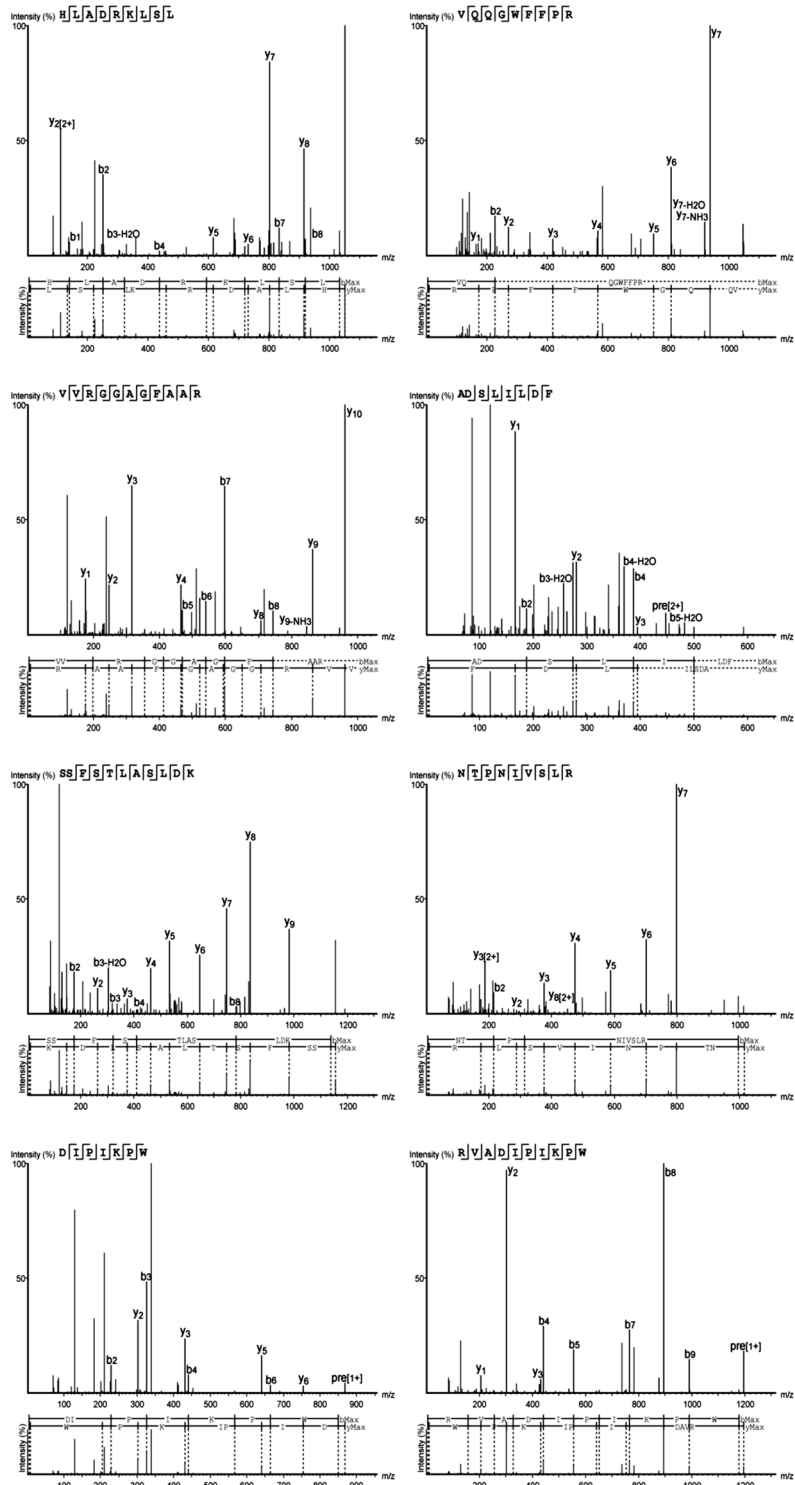

**Supplemental Fig S14 Peptide identification with PEAKS.** Mass spectra of the indicated CLT-derived peptides, identified in the PXD004894 dataset with PEAKS. Product ions are also indicated.

**A**

**Predicted MHC binder (HLA-A)**

| Peptide Sequence | HLA-A*01:01 | HLA-A*02:02 | HLA-A*03:01 | HLA-A*24:02 | HLA-A*26:01 | HLA-A*31:01 | HLA-A*33:01 | HLA-A*68:01 |
|------------------|-------------|-------------|-------------|-------------|-------------|-------------|-------------|-------------|
| RVADIPKP         | 30,461      | 22,335      | 13,416      | 33,298      | 30,646      | 18,578      | 42,514      | 18,635      |
| RVADIPKPW        | 33,619      | 22,124      | 13,164      | 16,087      | 27,985      | 14,233      | 40,460      | 25,114      |
| NTPNIVSLR        | 23,315      | 31,975      | 8,425       | 34,872      | 6,526       | 161         | 54          | 5           |
| MNTPNIVSL        | 23,308      | 15,389      | 28,657      | 21,244      | 23,826      | 18,979      | 27,595      | 20,559      |
| HLADRKLSL        | 19,894      | 256         | 10,621      | 27,466      | 14,022      | 15,616      | 26,536      | 29,886      |
| VVRGGAGFAAR      | 39,751      | 33,887      | 8,037       | 45,045      | 30,619      | 243         | 737         | 13,768      |
| ARLQGSVT         | 39,608      | 43,061      | 43,368      | 45,865      | 39,387      | 42,844      | 47,781      | 47,660      |
| VQQGWFFPR        | 27,887      | 12,841      | 5,583       | 10,373      | 24,238      | 4           | 56          | 2,165       |
| SSFSTLASLTK      | 27,285      | 22,021      | 817         | 39,794      | 32,736      | 5,795       | 19,401      | 2,192       |
| ADSLILDF         | 19,176      | 29,967      | 35,171      | 34,074      | 36,990      | 39,228      | 46,365      | 44,098      |
| ESSAETSP         | 29,869      | 45,638      | 43,440      | 46,462      | 29,625      | 44,487      | 45,881      | 40,133      |
| AETSPADSLIL      | 22,981      | 34,060      | 34,273      | 36,430      | 29,375      | 39,035      | 42,678      | 29,890      |

**Predicted MHC binder (HLA-B)**

| Peptide Sequence | HLA-B*07:02 | HLA-B*08:01 | HLA-B*15:01 | HLA-B*27:05 | HLA-B*39:01 | HLA-B*40:01 | HLA-B*58:01 |
|------------------|-------------|-------------|-------------|-------------|-------------|-------------|-------------|
| RVADIPKP         | 26,033      | 33,916      | 24,696      | 20,377      | 31,565      | 21,822      | 14,810      |
| RVADIPKPW        | 8,804       | 27,610      | 3,310       | 18,779      | 32,033      | 31,758      | 178         |
| NTPNIVSLR        | 31,410      | 30,147      | 38,132      | 24,787      | 35,288      | 32,155      | 30,751      |
| MNTPNIVSL        | 11,597      | 3,896       | 11,167      | 20,245      | 896         | 11,275      | 9,242       |
| HLADRKLSL        | 458         | 42          | 1,392       | 12,559      | 1,871       | 20,639      | 18,477      |
| VVRGGAGFAAR      | 16,152      | 34,329      | 31,049      | 11,814      | 37,753      | 37,146      | 38,335      |
| ARLQGSVT         | 26,308      | 28,228      | 36,906      | 10,770      | 33,038      | 39,309      | 38,987      |
| VQQGWFFPR        | 28,336      | 28,607      | 5,305       | 494         | 7,029       | 12,250      | 26,259      |
| SSFSTLASLTK      | 32,884      | 34,931      | 30,390      | 30,982      | 25,958      | 36,015      | 22,577      |
| ADSLILDF         | 38,628      | 40,127      | 29,585      | 37,439      | 39,094      | 32,271      | 26,262      |
| ESSAETSP         | 41,715      | 38,906      | 32,910      | 41,270      | 39,410      | 26,813      | 23,652      |
| AETSPADSLIL      | 36,138      | 25,183      | 32,775      | 36,858      | 30,467      | 266         | 18,748      |

■ Strong  
■ Weak  
■ Non-binder

**Predicted MHC binder (HLA-C)**

| Peptide Sequence | HLA-C*03:03 | HLA-C*04:01 | HLA-C*05:01 | HLA-C*06:02 | HLA-C*07:01 | HLA-C*07:02 | HLA-C*08:02 | HLA-C*12:03 | HLA-C*14:02 | HLA-C*15:02 |
|------------------|-------------|-------------|-------------|-------------|-------------|-------------|-------------|-------------|-------------|-------------|
| RVADIPKP         | 20,352      | 22,266      | 22,364      | 36,596      | 31,532      | 35,176      | 33,533      | 6,164       | 36,593      | 10,092      |
| RVADIPKPW        | 24,372      | 38,809      | 27,344      | 46,681      | 45,320      | 40,855      | 32,317      | 16,299      | 38,190      | 39,338      |
| NTPNIVSLR        | 43,315      | 11,977      | 29,464      | 25,314      | 20,987      | 39,581      | 30,638      | 27,017      | 16,357      | 30,749      |
| MNTPNIVSL        | 91          | 10,452      | 28,443      | 8,166       | 1,682       | 2,350       | 22,412      | 83          | 718         | 12,640      |
| HLADRKLSL        | 245         | 9,358       | 31,180      | 6,853       | 2,635       | 3,349       | 19,532      | 1,185       | 3,005       | 7,452       |
| VVRGGAGFAAR      | 47,078      | 38,123      | 47,245      | 45,702      | 45,714      | 44,129      | 45,523      | 44,280      | 45,133      | 47,117      |
| ARLQGSVT         | 47,072      | 42,625      | 47,280      | 32,156      | 36,488      | 38,481      | 44,894      | 45,057      | 45,829      | 47,073      |
| VQQGWFFPR        | 28,222      | 10,843      | 43,156      | 45,699      | 41,759      | 18,323      | 32,628      | 25,324      | 22,146      | 29,645      |
| SSFSTLASLTK      | 36,483      | 34,472      | 47,207      | 39,985      | 38,371      | 43,466      | 42,155      | 38,297      | 34,289      | 31,588      |
| ADSLILDF         | 45,130      | 38,316      | 12,335      | 45,724      | 44,150      | 42,543      | 24,798      | 40,992      | 45,920      | 45,271      |
| ESSAETSP         | 46,300      | 43,559      | 47,563      | 47,842      | 47,024      | 47,492      | 42,103      | 45,850      | 45,898      | 42,032      |
| AETSPADSLIL      | 35,632      | 37,550      | 44,507      | 42,836      | 41,223      | 43,202      | 39,206      | 40,932      | 36,846      | 20,363      |

**B**

**Melanoma Patient**      **Identified peptide in respective patient**

| Melanoma Patient | HLA type    | Score | % Rank |
|------------------|-------------|-------|--------|
| <b>Mel5</b>      | HLA-A*01    | 0.015 | 7.231  |
|                  | HLA-A*25    | 0.066 | 0.999  |
|                  | HLA-B*08    | 0.003 | 21.977 |
|                  | HLA-B*18    | 0.003 | 8.546  |
| <b>Mel12</b>     | HLA-A*01:01 | 0.038 | 4.199  |
|                  | HLA-B*08:01 | 0.001 | 36.707 |
|                  | HLA-C*07:01 | 0.011 | 8.543  |
| <b>Mel15</b>     | HLA-A*03:01 | 0.059 | 2.734  |
|                  | HLA-A*68:01 | 0.924 | 0.015  |
|                  | HLA-B*27:05 | 0.001 | 15.182 |
|                  | HLA-B*35:03 | 0.000 | 34.200 |
|                  | HLA-C*02:02 | 0.023 | 10.541 |
| <b>Mel16</b>     | HLA-A*01:01 | 0.026 | 5.164  |
|                  | HLA-A*24:01 | 0.016 | 5.838  |
|                  | HLA-B*07:01 | 0.228 | 0.743  |
|                  | HLA-B*08:01 | 0.893 | 0.009  |
|                  | HLA-C*07:01 | 0.321 | 0.300  |
|                  | HLA-C*07:02 | 0.429 | 0.390  |

■ Strong  
■ Weak  
■ Non-binder

**Supplemental Fig S15 Predicted MHC class I binding affinities of identified peptides. (A)** Affinities of the eluted CLT peptides for the indicated major HLA allotypes, as calculated using NetMHC4.0. Peptides with strong or weak binding affinity are also indicated by different colors. **(B)** Scores and % Ranks of peptides eluted from a given patient for binding to the HLA alleles of that patient, as calculated using NetMHCpan4.0. Only patients from whom CLT-derived peptides were eluted and the HLA haplotype was known are included (Mel5, Mel12, Mel15 and Mel16, according to Bassani-Sternberg et al. 2016).

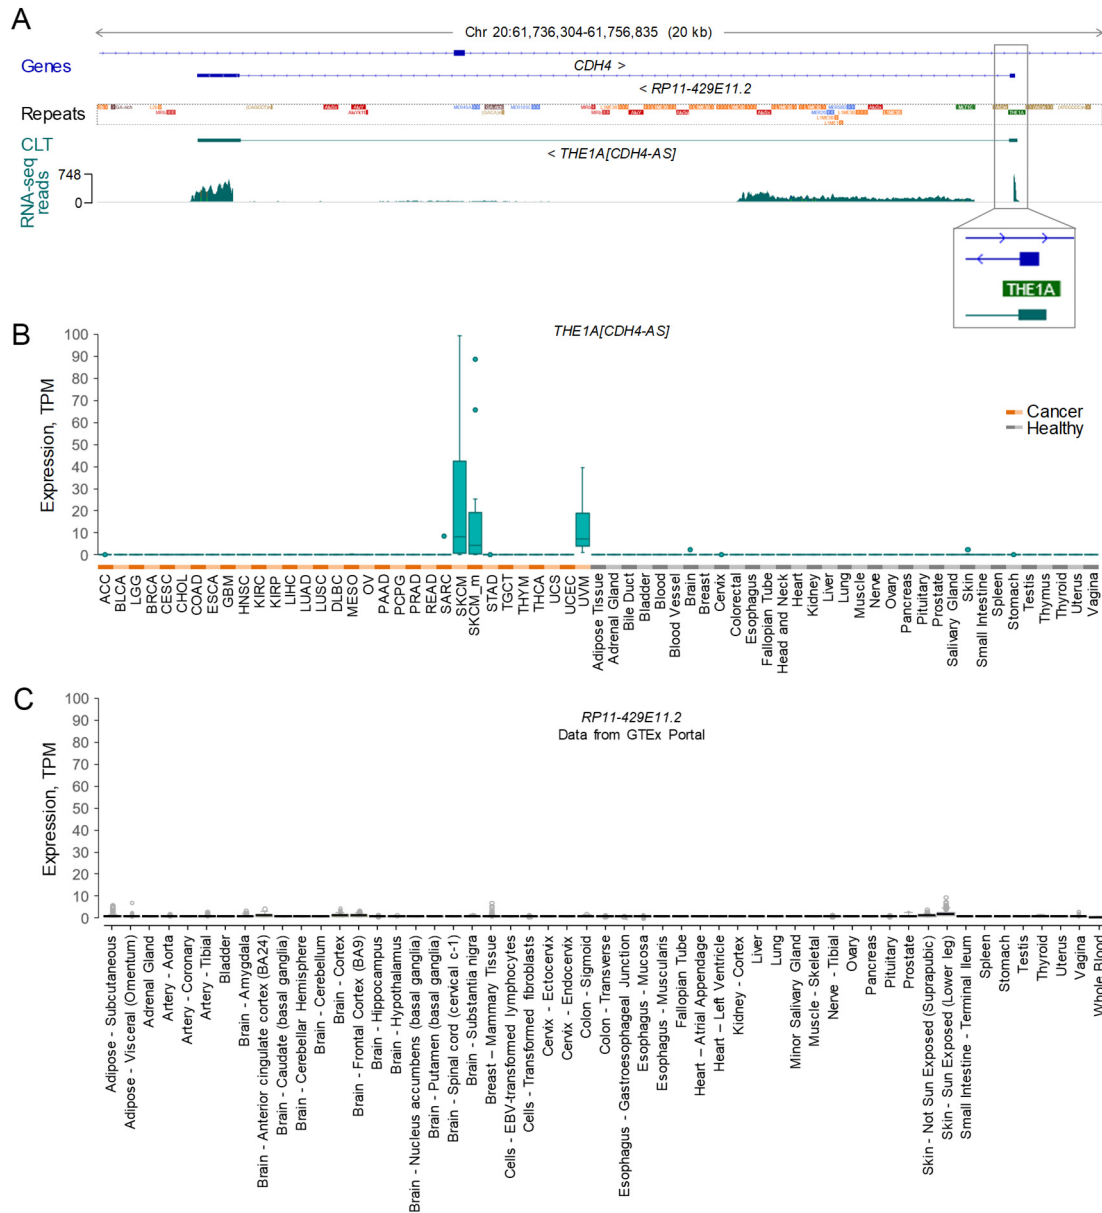

**Supplemental Fig S16 Structure and expression of *THE1A[CDH4-AS]* in melanoma. (A)** GENCODE annotated transcripts at the indicated genomic location (Genes), repeat content (Repeats), structure of *THE1A[CDH4-AS]* in the current assembly (CLT) and RNA-seq trace of a representative SKCM sample. **(B)** Box plot of *THE1A[CDH4-AS]* expression in cancer patient and healthy control samples. **(C)** Box plot of *RP11-429E11.2* expression in a collection of healthy control samples from GTEx Portal. Although the scale of the y-axes in **(B)** and **(C)** were plotted to the same scale, the larger transcriptome that we use as denominator in our assembly produces lower overall TPM values than estimated on GTEx Portal.



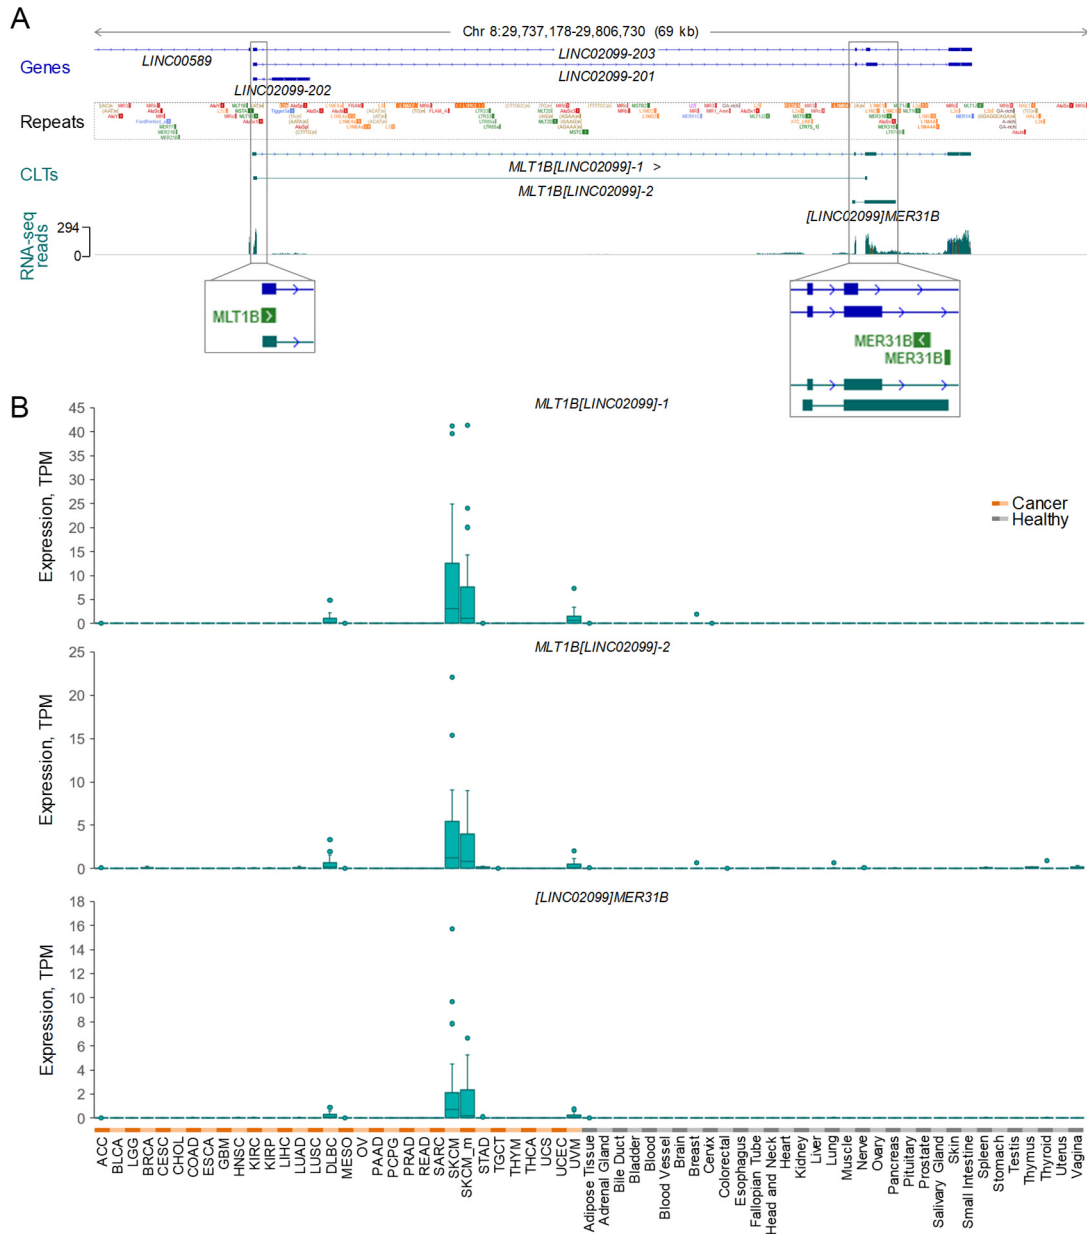

**Supplemental Fig S17 Structure and expression of CLTs at the *LINC02099* locus in melanoma. (A)** GENCODE annotated transcripts at the indicated genomic location (Genes), repeat content (Repeats), structure of indicated CLTs at the *LINC02099* locus in the current assembly (CLTs) and RNA-seq trace of a representative SKCM sample. **(B)** Box plot of *MLT1B[LINC02099]-1*, *MLT1B[LINC02099]-1* or *[LINC02099]MER31B* expression in cancer patient and healthy control samples.
