# Supplementary material for: LTR retroelement expansion of the human cancer transcriptome and immunopeptidome revealed by de novo transcript assembly
Source: Genome Res. 2019 Oct;29(10):1578–90. doi: 10.1101/gr.248922.119 (PMC6771403; doi:10.1101/gr.248922.119)
Supplement: Supplemental Material [file supp_gr.248922.119_Supplemental_Tables.xlsx]

## Sheet: Supplemental_Table_S1
Supplemental_Table_S1. Cancer samples used for transcriptome assembly and for quantitation
sampleID	consortium	disease	project_disease_type	tissue_origin	organism_part	gender	order_combined
babe3082-5f9b-4e2c-85b6-0c4c840ed00b	TCGA	Cancer	Skin Cutaneous Melanoma_metastatic	Skin	Skin	male	Skin Skin Cutaneous Melanoma_metastatic
357ea0d5-9aec-444a-8d2a-4b1e802280b9	TCGA	Cancer	Skin Cutaneous Melanoma_metastatic	Skin	Skin	female	Skin Skin Cutaneous Melanoma_metastatic
e0ce2ceb-c2c2-496b-990c-7aa87ab77956	TCGA	Cancer	Skin Cutaneous Melanoma_metastatic	Skin	Skin	female	Skin Skin Cutaneous Melanoma_metastatic
28248d1a-959c-424c-971c-8e92a61c055a	TCGA	Cancer	Skin Cutaneous Melanoma_metastatic	Skin	Skin	male	Skin Skin Cutaneous Melanoma_metastatic
7125c639-da26-49ca-98ba-3a701def71be	TCGA	Cancer	Skin Cutaneous Melanoma_metastatic	Skin	Skin	female	Skin Skin Cutaneous Melanoma_metastatic
94d20006-0be7-4edd-aacb-583656348721	TCGA	Cancer	Skin Cutaneous Melanoma_metastatic	Skin	Skin	female	Skin Skin Cutaneous Melanoma_metastatic
4f38efeb-7af5-41d0-ad23-b4f015daa3fe	TCGA	Cancer	Skin Cutaneous Melanoma_metastatic	Skin	Skin	male	Skin Skin Cutaneous Melanoma_metastatic
c85c22da-304b-4d5b-9fdd-b82f1daf6414	TCGA	Cancer	Skin Cutaneous Melanoma_metastatic	Skin	Skin	male	Skin Skin Cutaneous Melanoma_metastatic
f54cca32-81dc-4ab2-a247-b1800871dc1f	TCGA	Cancer	Skin Cutaneous Melanoma_metastatic	Skin	Skin	male	Skin Skin Cutaneous Melanoma_metastatic
eb9b744d-6f74-4aa2-845b-0c48a48be25d	TCGA	Cancer	Skin Cutaneous Melanoma_metastatic	Skin	Skin	female	Skin Skin Cutaneous Melanoma_metastatic
773af3dc-2dc5-42bd-bd06-a5d7edf7717a	TCGA	Cancer	Skin Cutaneous Melanoma_metastatic	Skin	Skin	female	Skin Skin Cutaneous Melanoma_metastatic
cc487c6b-ff32-47e9-8c15-9cc1bb3b4a09	TCGA	Cancer	Skin Cutaneous Melanoma_metastatic	Skin	Skin	male	Skin Skin Cutaneous Melanoma_metastatic
d69fcf07-c38d-49b9-ba4e-3874235446be	TCGA	Cancer	Skin Cutaneous Melanoma_metastatic	Skin	Skin	male	Skin Skin Cutaneous Melanoma_metastatic
eb658798-d2ec-476d-8ed5-fe2817a5a7c8	TCGA	Cancer	Skin Cutaneous Melanoma_metastatic	Skin	Skin	female	Skin Skin Cutaneous Melanoma_metastatic
d0830e47-6b02-477f-b281-f641adb1e7f9	TCGA	Cancer	Skin Cutaneous Melanoma_metastatic	Skin	Skin	female	Skin Skin Cutaneous Melanoma_metastatic
adc13cd8-a9a4-491a-a327-dfe763278960	TCGA	Cancer	Skin Cutaneous Melanoma_metastatic	Skin	Skin	female	Skin Skin Cutaneous Melanoma_metastatic
8323fd51-84c0-4482-baef-66dd9630db0b	TCGA	Cancer	Skin Cutaneous Melanoma_metastatic	Skin	Skin	male	Skin Skin Cutaneous Melanoma_metastatic
a548fb8d-f3d8-4c08-b271-75605850734d	TCGA	Cancer	Skin Cutaneous Melanoma_metastatic	Skin	Skin	male	Skin Skin Cutaneous Melanoma_metastatic
8969b53f-71dc-44b6-9a6b-c70019632179	TCGA	Cancer	Skin Cutaneous Melanoma_metastatic	Skin	Skin	male	Skin Skin Cutaneous Melanoma_metastatic
fd8663a5-d30e-47f1-a815-71dbb756a82a	TCGA	Cancer	Skin Cutaneous Melanoma_metastatic	Skin	Skin	female	Skin Skin Cutaneous Melanoma_metastatic
ff2d4d4f-72c9-4234-8b50-183c0f036040	TCGA	Cancer	Skin Cutaneous Melanoma_metastatic	Skin	Skin	female	Skin Skin Cutaneous Melanoma_metastatic
148cd32d-a6d9-4114-b1e4-9fa4eab5490d	TCGA	Cancer	Skin Cutaneous Melanoma_metastatic	Skin	Skin	male	Skin Skin Cutaneous Melanoma_metastatic
41d0295e-4d7b-482a-85fe-ed4709765569	TCGA	Cancer	Skin Cutaneous Melanoma_metastatic	Skin	Skin	male	Skin Skin Cutaneous Melanoma_metastatic
235d3047-8e62-4fce-be13-592ff0a760e2	TCGA	Cancer	Skin Cutaneous Melanoma_metastatic	Skin	Skin	female	Skin Skin Cutaneous Melanoma_metastatic
b4c035eb-d9e0-4a5b-a7e8-daee10c17fe7	TCGA	Cancer	Adrenocortical Carcinoma	Adrenal Gland	Adrenal Gland	female	Adrenal Gland Adrenocortical Carcinoma
aedb5714-6162-44a7-9a19-541b5f8b7240	TCGA	Cancer	Adrenocortical Carcinoma	Adrenal Gland	Adrenal Gland	male	Adrenal Gland Adrenocortical Carcinoma
a8c36f60-f108-4f32-8da7-b3e5b7b1d3da	TCGA	Cancer	Adrenocortical Carcinoma	Adrenal Gland	Adrenal Gland	female	Adrenal Gland Adrenocortical Carcinoma
3093ffe5-32ff-4e61-891e-d786a6d255a1	TCGA	Cancer	Adrenocortical Carcinoma	Adrenal Gland	Adrenal Gland	female	Adrenal Gland Adrenocortical Carcinoma
a9b0269c-c36d-4266-bf42-fed09ae13a82	TCGA	Cancer	Adrenocortical Carcinoma	Adrenal Gland	Adrenal Gland	female	Adrenal Gland Adrenocortical Carcinoma
c12cc6ff-ade5-4603-9749-2a8b15b63d01	TCGA	Cancer	Adrenocortical Carcinoma	Adrenal Gland	Adrenal Gland	male	Adrenal Gland Adrenocortical Carcinoma
8e0fcab2-b304-4858-91a6-93ed07e01e22	TCGA	Cancer	Adrenocortical Carcinoma	Adrenal Gland	Adrenal Gland	female	Adrenal Gland Adrenocortical Carcinoma
b22a7bf1-eeba-4236-93e0-95a06c1eae2c	TCGA	Cancer	Adrenocortical Carcinoma	Adrenal Gland	Adrenal Gland	male	Adrenal Gland Adrenocortical Carcinoma
5de8db95-ab16-4cc0-befb-17af912a0e3b	TCGA	Cancer	Adrenocortical Carcinoma	Adrenal Gland	Adrenal Gland	male	Adrenal Gland Adrenocortical Carcinoma
b860c6bf-8ee5-478d-99fd-988feccc0cb6	TCGA	Cancer	Adrenocortical Carcinoma	Adrenal Gland	Adrenal Gland	male	Adrenal Gland Adrenocortical Carcinoma
b1014ce3-95ff-4ef8-8ff5-27f9fb32e787	TCGA	Cancer	Adrenocortical Carcinoma	Adrenal Gland	Adrenal Gland	male	Adrenal Gland Adrenocortical Carcinoma
e34a4d48-8c02-46fc-ae9d-d45d484bacaa	TCGA	Cancer	Adrenocortical Carcinoma	Adrenal Gland	Adrenal Gland	female	Adrenal Gland Adrenocortical Carcinoma
01d8a0bd-be57-4c96-8950-3783ce4b8ecc	TCGA	Cancer	Adrenocortical Carcinoma	Adrenal Gland	Adrenal Gland	male	Adrenal Gland Adrenocortical Carcinoma
fd1eed01-1c39-4e91-ab00-d314c54cea38	TCGA	Cancer	Adrenocortical Carcinoma	Adrenal Gland	Adrenal Gland	male	Adrenal Gland Adrenocortical Carcinoma
358bc4a0-7ebe-4dac-824c-fa9843bbd89e	TCGA	Cancer	Adrenocortical Carcinoma	Adrenal Gland	Adrenal Gland	female	Adrenal Gland Adrenocortical Carcinoma
c1d323c4-cd80-4bd6-8a7c-d691dc15a364	TCGA	Cancer	Adrenocortical Carcinoma	Adrenal Gland	Adrenal Gland	male	Adrenal Gland Adrenocortical Carcinoma
6217dddc-a7bd-4107-8e25-e2aa488b73bf	TCGA	Cancer	Adrenocortical Carcinoma	Adrenal Gland	Adrenal Gland	female	Adrenal Gland Adrenocortical Carcinoma
46bdfb10-0004-407b-ae89-fe0e3319e7f2	TCGA	Cancer	Adrenocortical Carcinoma	Adrenal Gland	Adrenal Gland	male	Adrenal Gland Adrenocortical Carcinoma
db106383-e2dd-43bc-b5a0-a021116eaeca	TCGA	Cancer	Adrenocortical Carcinoma	Adrenal Gland	Adrenal Gland	female	Adrenal Gland Adrenocortical Carcinoma
34388e0f-80f9-483a-9d0a-dbcde691e167	TCGA	Cancer	Adrenocortical Carcinoma	Adrenal Gland	Adrenal Gland	female	Adrenal Gland Adrenocortical Carcinoma
83ec5f6f-c879-4628-a89b-5fac7dae347b	TCGA	Cancer	Adrenocortical Carcinoma	Adrenal Gland	Adrenal Gland	female	Adrenal Gland Adrenocortical Carcinoma
3cef5bda-3e2f-4784-86bd-4b48f096e0eb	TCGA	Cancer	Adrenocortical Carcinoma	Adrenal Gland	Adrenal Gland	female	Adrenal Gland Adrenocortical Carcinoma
da14a25b-1040-43fa-b8bf-24df51591cbe	TCGA	Cancer	Adrenocortical Carcinoma	Adrenal Gland	Adrenal Gland	male	Adrenal Gland Adrenocortical Carcinoma
c16269e6-4695-4198-a98d-b674b536c64d	TCGA	Cancer	Adrenocortical Carcinoma	Adrenal Gland	Adrenal Gland	male	Adrenal Gland Adrenocortical Carcinoma
cbca4da5-450b-4dac-a24e-6c5fb3ad09c6	TCGA	Cancer	Pheochromocytoma and Paraganglioma	Adrenal Gland	Adrenal Gland	female	Adrenal Gland Pheochromocytoma and Paraganglioma
b4129cdd-243f-4083-9074-1e782270f10a	TCGA	Cancer	Pheochromocytoma and Paraganglioma	Adrenal Gland	Adrenal Gland	female	Adrenal Gland Pheochromocytoma and Paraganglioma
caed60f2-a20f-4653-b8e9-6e06650a28ed	TCGA	Cancer	Pheochromocytoma and Paraganglioma	Adrenal Gland	Adrenal Gland	female	Adrenal Gland Pheochromocytoma and Paraganglioma
228ec51d-58a6-4c65-98b8-b5e27757be98	TCGA	Cancer	Pheochromocytoma and Paraganglioma	Adrenal Gland	Adrenal Gland	female	Adrenal Gland Pheochromocytoma and Paraganglioma
a8944211-554f-45b4-9f36-cea8ac2f6ba2	TCGA	Cancer	Pheochromocytoma and Paraganglioma	Adrenal Gland	Adrenal Gland	female	Adrenal Gland Pheochromocytoma and Paraganglioma
aa951a58-2019-4c8d-ac07-6429a0987860	TCGA	Cancer	Pheochromocytoma and Paraganglioma	Adrenal Gland	Adrenal Gland	male	Adrenal Gland Pheochromocytoma and Paraganglioma
a0a02e5f-3b6f-4146-bf60-cb608cae953b	TCGA	Cancer	Pheochromocytoma and Paraganglioma	Adrenal Gland	Adrenal Gland	male	Adrenal Gland Pheochromocytoma and Paraganglioma
d7b8bbf4-3a3a-4351-a318-9a1708e31e2b	TCGA	Cancer	Pheochromocytoma and Paraganglioma	Adrenal Gland	Adrenal Gland	female	Adrenal Gland Pheochromocytoma and Paraganglioma
d2dc9a57-7d41-4627-aa46-998856efb745	TCGA	Cancer	Pheochromocytoma and Paraganglioma	Adrenal Gland	Adrenal Gland	male	Adrenal Gland Pheochromocytoma and Paraganglioma
13174b7b-1048-43ef-b66a-be548013d0ec	TCGA	Cancer	Pheochromocytoma and Paraganglioma	Adrenal Gland	Adrenal Gland	female	Adrenal Gland Pheochromocytoma and Paraganglioma
a643df89-2c33-42dc-ab51-65f3778400e6	TCGA	Cancer	Pheochromocytoma and Paraganglioma	Adrenal Gland	Adrenal Gland	female	Adrenal Gland Pheochromocytoma and Paraganglioma
01446c47-6772-4b3a-8e60-6031cae3a2fa	TCGA	Cancer	Pheochromocytoma and Paraganglioma	Adrenal Gland	Adrenal Gland	male	Adrenal Gland Pheochromocytoma and Paraganglioma
db6bc106-4a3c-45c2-aeea-7dd56cc930a3	TCGA	Cancer	Pheochromocytoma and Paraganglioma	Adrenal Gland	Adrenal Gland	female	Adrenal Gland Pheochromocytoma and Paraganglioma
2732c98e-e424-456b-9a44-ff70cb28cf1b	TCGA	Cancer	Pheochromocytoma and Paraganglioma	Adrenal Gland	Adrenal Gland	male	Adrenal Gland Pheochromocytoma and Paraganglioma
28f271c2-8a5b-476d-95e1-83d9ebb2eeeb	TCGA	Cancer	Pheochromocytoma and Paraganglioma	Adrenal Gland	Adrenal Gland	male	Adrenal Gland Pheochromocytoma and Paraganglioma
979f9073-cb68-40e1-8b29-e8f676c46c4f	TCGA	Cancer	Pheochromocytoma and Paraganglioma	Adrenal Gland	Adrenal Gland	male	Adrenal Gland Pheochromocytoma and Paraganglioma
6b80910b-2946-4a55-9d9f-2c1cc8652acc	TCGA	Cancer	Pheochromocytoma and Paraganglioma	Adrenal Gland	Adrenal Gland	male	Adrenal Gland Pheochromocytoma and Paraganglioma
45b84c5a-dfd1-44e3-b425-b83203b5267f	TCGA	Cancer	Pheochromocytoma and Paraganglioma	Adrenal Gland	Adrenal Gland	male	Adrenal Gland Pheochromocytoma and Paraganglioma
cd265784-f6f6-43b4-b30b-62c35c08ed0c	TCGA	Cancer	Pheochromocytoma and Paraganglioma	Adrenal Gland	Adrenal Gland	male	Adrenal Gland Pheochromocytoma and Paraganglioma
d3d448cf-e57f-43b8-91e4-59b0d9d5f3e9	TCGA	Cancer	Pheochromocytoma and Paraganglioma	Adrenal Gland	Adrenal Gland	female	Adrenal Gland Pheochromocytoma and Paraganglioma
49d157f4-381e-4aa0-8652-0de98a5a4729	TCGA	Cancer	Pheochromocytoma and Paraganglioma	Adrenal Gland	Adrenal Gland	female	Adrenal Gland Pheochromocytoma and Paraganglioma
69603288-4ffc-4934-8e58-191cda043e8f	TCGA	Cancer	Pheochromocytoma and Paraganglioma	Adrenal Gland	Adrenal Gland	male	Adrenal Gland Pheochromocytoma and Paraganglioma
48f1a42e-ad29-4bdb-8aef-a3c74df181a7	TCGA	Cancer	Pheochromocytoma and Paraganglioma	Adrenal Gland	Adrenal Gland	male	Adrenal Gland Pheochromocytoma and Paraganglioma
72558d24-213a-41b6-9b32-973ea406bd2c	TCGA	Cancer	Pheochromocytoma and Paraganglioma	Adrenal Gland	Adrenal Gland	female	Adrenal Gland Pheochromocytoma and Paraganglioma
f22b02b7-2e41-44d3-ad7b-bc8891ab8728	TCGA	Cancer	Cholangiocarcinoma	Bile Duct	Bile Duct	female	Bile Duct Cholangiocarcinoma
7204338c-7777-4c15-b566-9b9c78366d39	TCGA	Cancer	Cholangiocarcinoma	Bile Duct	Bile Duct	male	Bile Duct Cholangiocarcinoma
f8d8c937-7551-4cf5-ab99-c36cfd092445	TCGA	Cancer	Cholangiocarcinoma	Bile Duct	Bile Duct	female	Bile Duct Cholangiocarcinoma
6bccd083-a96d-4ca1-a3cf-84bf111df514	TCGA	Cancer	Cholangiocarcinoma	Bile Duct	Bile Duct	female	Bile Duct Cholangiocarcinoma
9768e4c5-551b-4263-a39f-410ce4bb5958	TCGA	Cancer	Cholangiocarcinoma	Bile Duct	Bile Duct	female	Bile Duct Cholangiocarcinoma
e7c17adf-cf50-4f06-9cb3-27443c8431d1	TCGA	Cancer	Cholangiocarcinoma	Bile Duct	Bile Duct	male	Bile Duct Cholangiocarcinoma
05e83bf5-d53e-47b1-bf74-853877ba28ec	TCGA	Cancer	Cholangiocarcinoma	Bile Duct	Bile Duct	male	Bile Duct Cholangiocarcinoma
25a2e112-972b-4c08-80b4-7d631e1f8d7b	TCGA	Cancer	Cholangiocarcinoma	Bile Duct	Bile Duct	male	Bile Duct Cholangiocarcinoma
4271a821-1130-4e7f-ae72-ac9e99b67a3f	TCGA	Cancer	Cholangiocarcinoma	Bile Duct	Bile Duct	female	Bile Duct Cholangiocarcinoma
6f8fd02b-464f-49fa-9e3f-91c1bef9cf5f	TCGA	Cancer	Cholangiocarcinoma	Bile Duct	Bile Duct	female	Bile Duct Cholangiocarcinoma
673dd808-cf12-4e7e-9de1-c32ef11fe742	TCGA	Cancer	Cholangiocarcinoma	Bile Duct	Bile Duct	male	Bile Duct Cholangiocarcinoma
5be8442a-045e-482e-a95e-fee0dbf37492	TCGA	Cancer	Cholangiocarcinoma	Bile Duct	Bile Duct	male	Bile Duct Cholangiocarcinoma
efb46bc9-82d4-414e-8949-a0294fcf1c08	TCGA	Cancer	Cholangiocarcinoma	Bile Duct	Bile Duct	female	Bile Duct Cholangiocarcinoma
1682f37b-83c0-41a9-84fc-9255897b4245	TCGA	Cancer	Cholangiocarcinoma	Bile Duct	Bile Duct	female	Bile Duct Cholangiocarcinoma
828fb3e0-7548-4af0-b4c5-564eebaf8722	TCGA	Cancer	Cholangiocarcinoma	Bile Duct	Bile Duct	male	Bile Duct Cholangiocarcinoma
d572e7a1-9092-4e42-bab5-929c3704b4c1	TCGA	Cancer	Cholangiocarcinoma	Bile Duct	Bile Duct	male	Bile Duct Cholangiocarcinoma
3010c30d-e65e-4433-bfb9-2e724c7f3106	TCGA	Cancer	Cholangiocarcinoma	Bile Duct	Bile Duct	female	Bile Duct Cholangiocarcinoma
29a3ea37-4d36-4f4e-9f55-365a7ebba6a9	TCGA	Cancer	Cholangiocarcinoma	Bile Duct	Bile Duct	female	Bile Duct Cholangiocarcinoma
f98630f6-7cd3-4059-b6e1-72cfb61ebfc3	TCGA	Cancer	Cholangiocarcinoma	Bile Duct	Bile Duct	male	Bile Duct Cholangiocarcinoma
5d1860dd-3ec0-4a4d-827d-95e0957d9db7	TCGA	Cancer	Cholangiocarcinoma	Bile Duct	Bile Duct	male	Bile Duct Cholangiocarcinoma
514e293e-76c2-404a-8037-27e31c5a7f39	TCGA	Cancer	Cholangiocarcinoma	Bile Duct	Bile Duct	male	Bile Duct Cholangiocarcinoma
9105c481-bb1a-494a-8e93-f71a793bf04c	TCGA	Cancer	Cholangiocarcinoma	Bile Duct	Bile Duct	male	Bile Duct Cholangiocarcinoma
b3284d8e-b147-4c53-ba30-2409cfba1848	TCGA	Cancer	Cholangiocarcinoma	Bile Duct	Bile Duct	female	Bile Duct Cholangiocarcinoma
ccf96ae7-83f0-4cdc-9707-5dbebd5e0ec0	TCGA	Cancer	Cholangiocarcinoma	Bile Duct	Bile Duct	female	Bile Duct Cholangiocarcinoma
f94c4b33-da05-4c07-8c7b-d8369ca81051	TCGA	Cancer	Bladder Urothelial Carcinoma	Bladder	Bladder	female	Bladder Bladder Urothelial Carcinoma
4a200687-aabe-4424-a1bd-fc7be9f1b915	TCGA	Cancer	Bladder Urothelial Carcinoma	Bladder	Bladder	male	Bladder Bladder Urothelial Carcinoma
67ed7d4d-6b96-4b86-ad14-5c50d34b1abc	TCGA	Cancer	Bladder Urothelial Carcinoma	Bladder	Bladder	female	Bladder Bladder Urothelial Carcinoma
8246d561-3abe-44b3-af70-05b789c7df20	TCGA	Cancer	Bladder Urothelial Carcinoma	Bladder	Bladder	male	Bladder Bladder Urothelial Carcinoma
e2d1c228-6607-47c6-b03f-107316c5bea4	TCGA	Cancer	Bladder Urothelial Carcinoma	Bladder	Bladder	male	Bladder Bladder Urothelial Carcinoma
829e96c3-da63-4e29-b51c-b8952fd27137	TCGA	Cancer	Bladder Urothelial Carcinoma	Bladder	Bladder	male	Bladder Bladder Urothelial Carcinoma
95ac43f8-94e2-413a-bba1-46bf191df085	TCGA	Cancer	Bladder Urothelial Carcinoma	Bladder	Bladder	male	Bladder Bladder Urothelial Carcinoma
378f3574-035a-4e88-bafc-8ea439e939db	TCGA	Cancer	Bladder Urothelial Carcinoma	Bladder	Bladder	female	Bladder Bladder Urothelial Carcinoma
9268afe0-2bfc-4027-a3a9-1da8dc4b6707	TCGA	Cancer	Bladder Urothelial Carcinoma	Bladder	Bladder	female	Bladder Bladder Urothelial Carcinoma
d2beac65-0b94-42df-b9e6-f1dac98f183e	TCGA	Cancer	Bladder Urothelial Carcinoma	Bladder	Bladder	male	Bladder Bladder Urothelial Carcinoma
5afea2c1-825a-4f19-abea-dc4fa191b190	TCGA	Cancer	Bladder Urothelial Carcinoma	Bladder	Bladder	female	Bladder Bladder Urothelial Carcinoma
40625648-4805-49ff-aebe-4dba9f566390	TCGA	Cancer	Bladder Urothelial Carcinoma	Bladder	Bladder	female	Bladder Bladder Urothelial Carcinoma
9fb269fe-5824-4846-b1ff-3a97d9058f1f	TCGA	Cancer	Bladder Urothelial Carcinoma	Bladder	Bladder	male	Bladder Bladder Urothelial Carcinoma
fb25f601-fc85-419d-bc67-e305eb43eda7	TCGA	Cancer	Bladder Urothelial Carcinoma	Bladder	Bladder	female	Bladder Bladder Urothelial Carcinoma
c2922aea-5123-443b-bcc2-981ec7cf07f0	TCGA	Cancer	Bladder Urothelial Carcinoma	Bladder	Bladder	female	Bladder Bladder Urothelial Carcinoma
cde5a288-ecf4-4894-a3f0-f986568e6833	TCGA	Cancer	Bladder Urothelial Carcinoma	Bladder	Bladder	male	Bladder Bladder Urothelial Carcinoma
0cb34818-6a44-4385-89ea-edb60198d980	TCGA	Cancer	Bladder Urothelial Carcinoma	Bladder	Bladder	male	Bladder Bladder Urothelial Carcinoma
21ef91c8-b3db-4478-8c62-b3c0695dbd50	TCGA	Cancer	Bladder Urothelial Carcinoma	Bladder	Bladder	female	Bladder Bladder Urothelial Carcinoma
8263aac1-4022-4c69-a1dc-3a9948b36ba4	TCGA	Cancer	Bladder Urothelial Carcinoma	Bladder	Bladder	male	Bladder Bladder Urothelial Carcinoma
23348b0c-b57e-49b4-a334-ab7c92e6ed5a	TCGA	Cancer	Bladder Urothelial Carcinoma	Bladder	Bladder	female	Bladder Bladder Urothelial Carcinoma
13352b83-33ff-4039-861f-061e3374fc2b	TCGA	Cancer	Bladder Urothelial Carcinoma	Bladder	Bladder	female	Bladder Bladder Urothelial Carcinoma
34a983f7-aef7-4fe5-bdf7-947702277eb3	TCGA	Cancer	Bladder Urothelial Carcinoma	Bladder	Bladder	female	Bladder Bladder Urothelial Carcinoma
03b2efe6-f689-42ab-a6fa-21b2f058fffc	TCGA	Cancer	Bladder Urothelial Carcinoma	Bladder	Bladder	male	Bladder Bladder Urothelial Carcinoma
abb5e66f-66cb-42f2-8345-6586e0a1e233	TCGA	Cancer	Bladder Urothelial Carcinoma	Bladder	Bladder	male	Bladder Bladder Urothelial Carcinoma
715d68e5-cba9-45b0-bc61-d05d2b484075	TCGA	Cancer	Brain Lower Grade Glioma	Brain	Brain	female	Brain Brain Lower Grade Glioma
433fa923-2a92-4200-bfbf-3473a70b963f	TCGA	Cancer	Brain Lower Grade Glioma	Brain	Brain	male	Brain Brain Lower Grade Glioma
e97236a9-4248-4eb6-b1d4-f83cf100f5a4	TCGA	Cancer	Brain Lower Grade Glioma	Brain	Brain	female	Brain Brain Lower Grade Glioma
0b491854-27b9-4c41-ae16-7413c1ac0d09	TCGA	Cancer	Brain Lower Grade Glioma	Brain	Brain	female	Brain Brain Lower Grade Glioma
b0241d74-8a96-483d-acbf-afef7277a76e	TCGA	Cancer	Brain Lower Grade Glioma	Brain	Brain	male	Brain Brain Lower Grade Glioma
3f487a76-ca8a-497d-b063-cf2b2952cde5	TCGA	Cancer	Brain Lower Grade Glioma	Brain	Brain	female	Brain Brain Lower Grade Glioma
eec6cd24-dfc5-4c13-a430-36a57ce642ae	TCGA	Cancer	Brain Lower Grade Glioma	Brain	Brain	female	Brain Brain Lower Grade Glioma
ebd7f0f0-4512-49ec-b512-454d90ad596c	TCGA	Cancer	Brain Lower Grade Glioma	Brain	Brain	female	Brain Brain Lower Grade Glioma
7cc13c4e-4ea7-441b-a589-0ace1c49aafb	TCGA	Cancer	Brain Lower Grade Glioma	Brain	Brain	female	Brain Brain Lower Grade Glioma
9288eab0-ad39-4ae9-8c41-9d294b530f19	TCGA	Cancer	Brain Lower Grade Glioma	Brain	Brain	male	Brain Brain Lower Grade Glioma
310f48ca-f924-4087-9921-2e4ebc306950	TCGA	Cancer	Brain Lower Grade Glioma	Brain	Brain	male	Brain Brain Lower Grade Glioma
ed591428-fc55-4a0b-b87f-a66e219c7ca6	TCGA	Cancer	Brain Lower Grade Glioma	Brain	Brain	male	Brain Brain Lower Grade Glioma
43cee8b5-c602-4190-9c7d-56ddfd2c490a	TCGA	Cancer	Brain Lower Grade Glioma	Brain	Brain	male	Brain Brain Lower Grade Glioma
818c3707-e792-4121-8fd8-56a64c3f30eb	TCGA	Cancer	Brain Lower Grade Glioma	Brain	Brain	male	Brain Brain Lower Grade Glioma
afe25cb0-799f-49ae-9121-cfec871f5ad7	TCGA	Cancer	Brain Lower Grade Glioma	Brain	Brain	female	Brain Brain Lower Grade Glioma
00d06cc4-ddf6-4fda-89a5-f72a2af546dd	TCGA	Cancer	Brain Lower Grade Glioma	Brain	Brain	male	Brain Brain Lower Grade Glioma
304692ab-f04f-41c4-88b4-ca404cb7c80e	TCGA	Cancer	Brain Lower Grade Glioma	Brain	Brain	female	Brain Brain Lower Grade Glioma
32cb34e4-46c0-4095-b0db-c9f6b5c05b78	TCGA	Cancer	Brain Lower Grade Glioma	Brain	Brain	male	Brain Brain Lower Grade Glioma
1d8134ef-cbd7-4ec1-b155-6617fd139ba8	TCGA	Cancer	Brain Lower Grade Glioma	Brain	Brain	male	Brain Brain Lower Grade Glioma
a2184c3a-82c7-44f7-9ab7-9ee25e003cb2	TCGA	Cancer	Brain Lower Grade Glioma	Brain	Brain	male	Brain Brain Lower Grade Glioma
02154742-a410-4ce5-93ca-caaff7e55dac	TCGA	Cancer	Brain Lower Grade Glioma	Brain	Brain	male	Brain Brain Lower Grade Glioma
4ec2fc83-5c0c-488f-8dc4-4219c15c6eda	TCGA	Cancer	Brain Lower Grade Glioma	Brain	Brain	female	Brain Brain Lower Grade Glioma
82480dba-1c6c-461f-b9e4-a35ce4144328	TCGA	Cancer	Brain Lower Grade Glioma	Brain	Brain	female	Brain Brain Lower Grade Glioma
9d3ae6fe-de4c-4b2f-acb1-bb54a8687bad	TCGA	Cancer	Brain Lower Grade Glioma	Brain	Brain	female	Brain Brain Lower Grade Glioma
d5961821-edab-41a2-8a10-38bed8ec6610	TCGA	Cancer	Glioblastoma Multiforme	Brain	Brain	male	Brain Glioblastoma Multiforme
2d2fa84d-c205-415f-9d35-e9719a6fd98f	TCGA	Cancer	Glioblastoma Multiforme	Brain	Brain	female	Brain Glioblastoma Multiforme
5280b92c-0fa4-4e7a-a18c-12c994f8c0b6	TCGA	Cancer	Glioblastoma Multiforme	Brain	Brain	male	Brain Glioblastoma Multiforme
01715c1f-2530-4943-a65c-0c4809dfba5a	TCGA	Cancer	Glioblastoma Multiforme	Brain	Brain	male	Brain Glioblastoma Multiforme
0fb8d0ed-fb27-4b1d-b465-0040628c2ca2	TCGA	Cancer	Glioblastoma Multiforme	Brain	Brain	female	Brain Glioblastoma Multiforme
1c581e76-072d-4060-9a65-c3203a0f3918	TCGA	Cancer	Glioblastoma Multiforme	Brain	Brain	male	Brain Glioblastoma Multiforme
df19a62e-ea78-40a2-b35f-ddbfe6131d01	TCGA	Cancer	Glioblastoma Multiforme	Brain	Brain	female	Brain Glioblastoma Multiforme
11da168f-9361-44cb-bc39-77614802fb73	TCGA	Cancer	Glioblastoma Multiforme	Brain	Brain	female	Brain Glioblastoma Multiforme
61366b3a-26e3-4f9e-baf5-9512ed44bbef	TCGA	Cancer	Glioblastoma Multiforme	Brain	Brain	female	Brain Glioblastoma Multiforme
afbf758e-17ae-4265-96b9-30fe3b1cb42f	TCGA	Cancer	Glioblastoma Multiforme	Brain	Brain	female	Brain Glioblastoma Multiforme
fddd420e-1b94-4b88-993e-355291d8d74a	TCGA	Cancer	Glioblastoma Multiforme	Brain	Brain	male	Brain Glioblastoma Multiforme
212ae104-eccf-4888-a4e0-2e9be74ac1f1	TCGA	Cancer	Glioblastoma Multiforme	Brain	Brain	male	Brain Glioblastoma Multiforme
b26f3576-01a8-4048-a131-d90c232ef063	TCGA	Cancer	Glioblastoma Multiforme	Brain	Brain	male	Brain Glioblastoma Multiforme
fc534c42-60c7-495c-926b-39768a06d4c3	TCGA	Cancer	Glioblastoma Multiforme	Brain	Brain	male	Brain Glioblastoma Multiforme
d9218a68-50c9-4557-a53e-ff1835f1e68f	TCGA	Cancer	Glioblastoma Multiforme	Brain	Brain	female	Brain Glioblastoma Multiforme
a1f01073-e300-4472-810f-48de209f0e26	TCGA	Cancer	Glioblastoma Multiforme	Brain	Brain	female	Brain Glioblastoma Multiforme
32446235-b5ee-4f28-ab8c-242bade198d1	TCGA	Cancer	Glioblastoma Multiforme	Brain	Brain	male	Brain Glioblastoma Multiforme
dc6da322-f307-4d57-8017-2402c75fefa2	TCGA	Cancer	Glioblastoma Multiforme	Brain	Brain	male	Brain Glioblastoma Multiforme
7120047e-ca19-486b-bc4c-3002c8a7563c	TCGA	Cancer	Glioblastoma Multiforme	Brain	Brain	female	Brain Glioblastoma Multiforme
593b8463-f60e-44b9-ad21-8952608ac325	TCGA	Cancer	Glioblastoma Multiforme	Brain	Brain	male	Brain Glioblastoma Multiforme
3dd6b389-ef88-4640-a9b0-c7117a2445ce	TCGA	Cancer	Glioblastoma Multiforme	Brain	Brain	female	Brain Glioblastoma Multiforme
3574d939-da89-4d0c-b523-5002160cb9b2	TCGA	Cancer	Glioblastoma Multiforme	Brain	Brain	male	Brain Glioblastoma Multiforme
60e26e91-6d7c-4603-8e8e-07ac14e091bc	TCGA	Cancer	Glioblastoma Multiforme	Brain	Brain	female	Brain Glioblastoma Multiforme
18b748f6-e937-4d57-9b6c-3c3f28f82c79	TCGA	Cancer	Glioblastoma Multiforme	Brain	Brain	female	Brain Glioblastoma Multiforme
fb488df1-93c4-4676-a699-3766731ee4ca	TCGA	Cancer	Breast Invasive Carcinoma	Breast	Breast	female	Breast Breast Invasive Carcinoma
74e417e4-ea6b-4943-bf1b-354a3e8f6120	TCGA	Cancer	Breast Invasive Carcinoma	Breast	Breast	female	Breast Breast Invasive Carcinoma
c3588f96-95c6-4008-bda2-502ceb963adb	TCGA	Cancer	Breast Invasive Carcinoma	Breast	Breast	female	Breast Breast Invasive Carcinoma
f1ac7898-c061-4405-b043-667ca8a46b72	TCGA	Cancer	Breast Invasive Carcinoma	Breast	Breast	female	Breast Breast Invasive Carcinoma
b0b82787-a5bb-4f1b-be2a-41efd318139e	TCGA	Cancer	Breast Invasive Carcinoma	Breast	Breast	female	Breast Breast Invasive Carcinoma
1a2c9e96-f861-4da0-b1b4-ad15baf85d4e	TCGA	Cancer	Breast Invasive Carcinoma	Breast	Breast	female	Breast Breast Invasive Carcinoma
f683321b-48f8-4441-87e6-6e4e8651f138	TCGA	Cancer	Breast Invasive Carcinoma	Breast	Breast	female	Breast Breast Invasive Carcinoma
1ded5bff-8aab-41fb-8da1-b9cbd52e6da5	TCGA	Cancer	Breast Invasive Carcinoma	Breast	Breast	female	Breast Breast Invasive Carcinoma
db95c977-8cc1-447e-8ddf-b4d32b93b1f2	TCGA	Cancer	Breast Invasive Carcinoma	Breast	Breast	female	Breast Breast Invasive Carcinoma
df0d7338-3885-451d-a424-f390f64d8bb9	TCGA	Cancer	Breast Invasive Carcinoma	Breast	Breast	female	Breast Breast Invasive Carcinoma
1f6ab8ee-9f1d-4c71-b7ca-e77a922380c4	TCGA	Cancer	Breast Invasive Carcinoma	Breast	Breast	female	Breast Breast Invasive Carcinoma
6cbf61e2-e54f-49e4-a3b2-99195ec695f3	TCGA	Cancer	Breast Invasive Carcinoma	Breast	Breast	female	Breast Breast Invasive Carcinoma
f5099442-8742-4f51-b88b-52ac9253d4f8	TCGA	Cancer	Breast Invasive Carcinoma	Breast	Breast	female	Breast Breast Invasive Carcinoma
54f4a051-e668-49f5-b38f-96f26841ca02	TCGA	Cancer	Breast Invasive Carcinoma	Breast	Breast	female	Breast Breast Invasive Carcinoma
d82718d0-c376-4e45-84b1-36d98efd15dc	TCGA	Cancer	Breast Invasive Carcinoma	Breast	Breast	female	Breast Breast Invasive Carcinoma
bb1b9616-f67a-40e7-842d-28da9d67fef5	TCGA	Cancer	Breast Invasive Carcinoma	Breast	Breast	female	Breast Breast Invasive Carcinoma
6cfa0ff3-0cf8-498b-82f6-5f1b5c89a609	TCGA	Cancer	Breast Invasive Carcinoma	Breast	Breast	female	Breast Breast Invasive Carcinoma
e7703880-2483-4240-9aa2-a85c3802e538	TCGA	Cancer	Breast Invasive Carcinoma	Breast	Breast	female	Breast Breast Invasive Carcinoma
ebdf2d0e-d309-442f-8e8b-e7b175bcb1c7	TCGA	Cancer	Breast Invasive Carcinoma	Breast	Breast	female	Breast Breast Invasive Carcinoma
cea4b42a-8d48-43f2-96a3-53f32b0f0c5e	TCGA	Cancer	Breast Invasive Carcinoma	Breast	Breast	female	Breast Breast Invasive Carcinoma
607cbc73-b640-4bab-b7d7-babefdf0fedf	TCGA	Cancer	Breast Invasive Carcinoma	Breast	Breast	female	Breast Breast Invasive Carcinoma
4e2b51eb-1ab8-40f2-a31a-8c799d48e6d3	TCGA	Cancer	Breast Invasive Carcinoma	Breast	Breast	female	Breast Breast Invasive Carcinoma
fb76cae1-8b63-4459-9c06-597dfd080a66	TCGA	Cancer	Breast Invasive Carcinoma	Breast	Breast	female	Breast Breast Invasive Carcinoma
e1a4167d-b4ca-405c-8550-cc32bb1b1d09	TCGA	Cancer	Breast Invasive Carcinoma	Breast	Breast	female	Breast Breast Invasive Carcinoma
1470149a-3128-480d-a649-ded748da8e71	TCGA	Cancer	Cervical Squamous Cell Carcinoma and Endocervical Adenocarcinoma	Cervix	Cervix	female	Cervix Cervical Squamous Cell Carcinoma and Endocervical Adenocarcinoma
17de7ab0-cb29-40a5-8821-9944b4097783	TCGA	Cancer	Cervical Squamous Cell Carcinoma and Endocervical Adenocarcinoma	Cervix	Cervix	female	Cervix Cervical Squamous Cell Carcinoma and Endocervical Adenocarcinoma
bc54058c-5a1e-442d-adfc-484718476416	TCGA	Cancer	Cervical Squamous Cell Carcinoma and Endocervical Adenocarcinoma	Cervix	Cervix	female	Cervix Cervical Squamous Cell Carcinoma and Endocervical Adenocarcinoma
23d12773-4630-4122-8984-3a1e179cba8d	TCGA	Cancer	Cervical Squamous Cell Carcinoma and Endocervical Adenocarcinoma	Cervix	Cervix	female	Cervix Cervical Squamous Cell Carcinoma and Endocervical Adenocarcinoma
4fc4019a-ea67-4f27-a070-ced009abac4e	TCGA	Cancer	Cervical Squamous Cell Carcinoma and Endocervical Adenocarcinoma	Cervix	Cervix	female	Cervix Cervical Squamous Cell Carcinoma and Endocervical Adenocarcinoma
a87882a9-b27e-48e3-84c3-0616f3574dfe	TCGA	Cancer	Cervical Squamous Cell Carcinoma and Endocervical Adenocarcinoma	Cervix	Cervix	female	Cervix Cervical Squamous Cell Carcinoma and Endocervical Adenocarcinoma
16bdf013-548e-43a5-9d42-3e11a9c778ab	TCGA	Cancer	Cervical Squamous Cell Carcinoma and Endocervical Adenocarcinoma	Cervix	Cervix	female	Cervix Cervical Squamous Cell Carcinoma and Endocervical Adenocarcinoma
4b71d73c-9cd9-4a7e-9e72-cdc92496e465	TCGA	Cancer	Cervical Squamous Cell Carcinoma and Endocervical Adenocarcinoma	Cervix	Cervix	female	Cervix Cervical Squamous Cell Carcinoma and Endocervical Adenocarcinoma
4e099ea0-983d-4e37-b1d3-d000c8509f40	TCGA	Cancer	Cervical Squamous Cell Carcinoma and Endocervical Adenocarcinoma	Cervix	Cervix	female	Cervix Cervical Squamous Cell Carcinoma and Endocervical Adenocarcinoma
85f477d2-f228-4c2d-ac9d-04db20f5ab42	TCGA	Cancer	Cervical Squamous Cell Carcinoma and Endocervical Adenocarcinoma	Cervix	Cervix	female	Cervix Cervical Squamous Cell Carcinoma and Endocervical Adenocarcinoma
d966d633-688f-4764-ae84-c6ee930fcfa1	TCGA	Cancer	Cervical Squamous Cell Carcinoma and Endocervical Adenocarcinoma	Cervix	Cervix	female	Cervix Cervical Squamous Cell Carcinoma and Endocervical Adenocarcinoma
438d5b5c-4e37-442f-be1d-e9de2e642846	TCGA	Cancer	Cervical Squamous Cell Carcinoma and Endocervical Adenocarcinoma	Cervix	Cervix	female	Cervix Cervical Squamous Cell Carcinoma and Endocervical Adenocarcinoma
5f07f8a9-dc8e-4df2-8524-cc2c69b93342	TCGA	Cancer	Cervical Squamous Cell Carcinoma and Endocervical Adenocarcinoma	Cervix	Cervix	female	Cervix Cervical Squamous Cell Carcinoma and Endocervical Adenocarcinoma
21f5bf50-6a89-49a6-a72b-8a77343e4337	TCGA	Cancer	Cervical Squamous Cell Carcinoma and Endocervical Adenocarcinoma	Cervix	Cervix	female	Cervix Cervical Squamous Cell Carcinoma and Endocervical Adenocarcinoma
b6bc4f03-3230-4601-88b4-df3145f85f5f	TCGA	Cancer	Cervical Squamous Cell Carcinoma and Endocervical Adenocarcinoma	Cervix	Cervix	female	Cervix Cervical Squamous Cell Carcinoma and Endocervical Adenocarcinoma
b2c4e862-25b5-4a70-9c7a-244e0de5d506	TCGA	Cancer	Cervical Squamous Cell Carcinoma and Endocervical Adenocarcinoma	Cervix	Cervix	female	Cervix Cervical Squamous Cell Carcinoma and Endocervical Adenocarcinoma
13f08e6c-35e9-47bd-9906-491f4bc22312	TCGA	Cancer	Cervical Squamous Cell Carcinoma and Endocervical Adenocarcinoma	Cervix	Cervix	female	Cervix Cervical Squamous Cell Carcinoma and Endocervical Adenocarcinoma
d77d0445-8844-40fd-9d76-e62b375a673e	TCGA	Cancer	Cervical Squamous Cell Carcinoma and Endocervical Adenocarcinoma	Cervix	Cervix	female	Cervix Cervical Squamous Cell Carcinoma and Endocervical Adenocarcinoma
ddbbe532-5f3f-40af-8179-64ad5c2c4c37	TCGA	Cancer	Cervical Squamous Cell Carcinoma and Endocervical Adenocarcinoma	Cervix	Cervix	female	Cervix Cervical Squamous Cell Carcinoma and Endocervical Adenocarcinoma
578b0b78-4d11-4fb4-9682-041ef3fc8a87	TCGA	Cancer	Cervical Squamous Cell Carcinoma and Endocervical Adenocarcinoma	Cervix	Cervix	female	Cervix Cervical Squamous Cell Carcinoma and Endocervical Adenocarcinoma
90900f43-227a-49e3-9d1a-6f440b2718fd	TCGA	Cancer	Cervical Squamous Cell Carcinoma and Endocervical Adenocarcinoma	Cervix	Cervix	female	Cervix Cervical Squamous Cell Carcinoma and Endocervical Adenocarcinoma
259cc116-980a-4382-94d3-82dfb441110f	TCGA	Cancer	Cervical Squamous Cell Carcinoma and Endocervical Adenocarcinoma	Cervix	Cervix	female	Cervix Cervical Squamous Cell Carcinoma and Endocervical Adenocarcinoma
d73a9ee0-fd5b-48ad-ab14-ba43578fdff0	TCGA	Cancer	Cervical Squamous Cell Carcinoma and Endocervical Adenocarcinoma	Cervix	Cervix	female	Cervix Cervical Squamous Cell Carcinoma and Endocervical Adenocarcinoma
9ee011fd-9789-4d26-9075-a3824a55329f	TCGA	Cancer	Cervical Squamous Cell Carcinoma and Endocervical Adenocarcinoma	Cervix	Cervix	female	Cervix Cervical Squamous Cell Carcinoma and Endocervical Adenocarcinoma
757f949f-6939-489d-9e71-f8d560b8c48a	TCGA	Cancer	Colon Adenocarcinoma	Colorectal	Colorectal	male	Colorectal Colon Adenocarcinoma
95874ff8-e812-4910-9c37-1bd833da1cf1	TCGA	Cancer	Colon Adenocarcinoma	Colorectal	Colorectal	male	Colorectal Colon Adenocarcinoma
82efc3d4-dfd0-40be-a162-4e8e0dc21cc5	TCGA	Cancer	Colon Adenocarcinoma	Colorectal	Colorectal	female	Colorectal Colon Adenocarcinoma
823bd826-336b-455b-beaa-cb5f6b0ede65	TCGA	Cancer	Colon Adenocarcinoma	Colorectal	Colorectal	female	Colorectal Colon Adenocarcinoma
b6fb6ac4-9a0e-49c9-abd3-e9e3d996fdb9	TCGA	Cancer	Colon Adenocarcinoma	Colorectal	Colorectal	male	Colorectal Colon Adenocarcinoma
791ce7f6-086f-4af2-a789-b2abe2a8e632	TCGA	Cancer	Colon Adenocarcinoma	Colorectal	Colorectal	female	Colorectal Colon Adenocarcinoma
805bced2-d006-4e50-b085-1ea048f546fd	TCGA	Cancer	Colon Adenocarcinoma	Colorectal	Colorectal	male	Colorectal Colon Adenocarcinoma
5cfd418f-86fc-4c9a-a4cd-86c288fff30a	TCGA	Cancer	Colon Adenocarcinoma	Colorectal	Colorectal	female	Colorectal Colon Adenocarcinoma
b624362c-0284-42db-9731-7e9f90f6272c	TCGA	Cancer	Colon Adenocarcinoma	Colorectal	Colorectal	female	Colorectal Colon Adenocarcinoma
dd099d2c-9b66-435c-99ad-a2dc96cb5ae7	TCGA	Cancer	Colon Adenocarcinoma	Colorectal	Colorectal	female	Colorectal Colon Adenocarcinoma
0ce7a043-07ae-49da-8c26-797c907e1d33	TCGA	Cancer	Colon Adenocarcinoma	Colorectal	Colorectal	female	Colorectal Colon Adenocarcinoma
e84d2134-d70b-4080-84c5-56d9ca1a1523	TCGA	Cancer	Colon Adenocarcinoma	Colorectal	Colorectal	male	Colorectal Colon Adenocarcinoma
a0d6c884-536c-46f7-ad97-7d7b75d2f51c	TCGA	Cancer	Colon Adenocarcinoma	Colorectal	Colorectal	male	Colorectal Colon Adenocarcinoma
39bee428-0e4b-4ecd-83a3-2a86d7f3ab1c	TCGA	Cancer	Colon Adenocarcinoma	Colorectal	Colorectal	female	Colorectal Colon Adenocarcinoma
f68f332d-7d4d-4ba4-9137-34e7427c640f	TCGA	Cancer	Colon Adenocarcinoma	Colorectal	Colorectal	female	Colorectal Colon Adenocarcinoma
c7562341-4438-4542-b6d7-a680f1d6020e	TCGA	Cancer	Colon Adenocarcinoma	Colorectal	Colorectal	female	Colorectal Colon Adenocarcinoma
dd6cc03a-72d8-4ae9-a69e-9d880c390344	TCGA	Cancer	Colon Adenocarcinoma	Colorectal	Colorectal	male	Colorectal Colon Adenocarcinoma
bdc5e928-ca2c-4cae-b3f3-80562db080bb	TCGA	Cancer	Colon Adenocarcinoma	Colorectal	Colorectal	female	Colorectal Colon Adenocarcinoma
b13aec04-b858-4ba1-94d4-f4ba597d2d9f	TCGA	Cancer	Colon Adenocarcinoma	Colorectal	Colorectal	male	Colorectal Colon Adenocarcinoma
35357ea6-a8e2-42c6-ab3b-2653babe2d67	TCGA	Cancer	Colon Adenocarcinoma	Colorectal	Colorectal	male	Colorectal Colon Adenocarcinoma
ba652979-876d-474d-8473-7da79eb82115	TCGA	Cancer	Colon Adenocarcinoma	Colorectal	Colorectal	male	Colorectal Colon Adenocarcinoma
e4ddee75-3b56-41ca-9ab7-09d1a8b61626	TCGA	Cancer	Colon Adenocarcinoma	Colorectal	Colorectal	female	Colorectal Colon Adenocarcinoma
653eb6a1-1b71-4f79-a3e8-37ae5e8e87ef	TCGA	Cancer	Colon Adenocarcinoma	Colorectal	Colorectal	male	Colorectal Colon Adenocarcinoma
c513f9b0-764d-4db0-a163-9d2b28111957	TCGA	Cancer	Colon Adenocarcinoma	Colorectal	Colorectal	male	Colorectal Colon Adenocarcinoma
04d25acd-c5d0-4619-ab61-1b8d32dbc877	TCGA	Cancer	Rectum Adenocarcinoma	Colorectal	Colorectal	male	Colorectal Rectum Adenocarcinoma
ab816440-a235-40e6-a0f9-da691a78b687	TCGA	Cancer	Rectum Adenocarcinoma	Colorectal	Colorectal	male	Colorectal Rectum Adenocarcinoma
84ac294f-a9e3-4245-a4d3-6e58ca75cfca	TCGA	Cancer	Rectum Adenocarcinoma	Colorectal	Colorectal	female	Colorectal Rectum Adenocarcinoma
8a19ad18-f83c-4699-a329-6a71ec91ed86	TCGA	Cancer	Rectum Adenocarcinoma	Colorectal	Colorectal	male	Colorectal Rectum Adenocarcinoma
70ca211c-f793-4079-845b-5306186e3c56	TCGA	Cancer	Rectum Adenocarcinoma	Colorectal	Colorectal	male	Colorectal Rectum Adenocarcinoma
02fb1f7a-1db4-4a74-927f-4354b74fc803	TCGA	Cancer	Rectum Adenocarcinoma	Colorectal	Colorectal	male	Colorectal Rectum Adenocarcinoma
dddb09dd-90c3-40c6-aa96-a9891d31ca23	TCGA	Cancer	Rectum Adenocarcinoma	Colorectal	Colorectal	female	Colorectal Rectum Adenocarcinoma
262c6c2e-9701-407f-a4c6-fa168ffdc5ea	TCGA	Cancer	Rectum Adenocarcinoma	Colorectal	Colorectal	female	Colorectal Rectum Adenocarcinoma
669b65a9-145a-42f0-934d-ef4e7791770c	TCGA	Cancer	Rectum Adenocarcinoma	Colorectal	Colorectal	male	Colorectal Rectum Adenocarcinoma
166eeba6-fe5a-49d9-abaf-9748904ac4e6	TCGA	Cancer	Rectum Adenocarcinoma	Colorectal	Colorectal	male	Colorectal Rectum Adenocarcinoma
b7a8acc2-d5f8-40b3-9919-bce45987e925	TCGA	Cancer	Rectum Adenocarcinoma	Colorectal	Colorectal	female	Colorectal Rectum Adenocarcinoma
a4848806-a25e-4918-9f1d-5b61b0dbfeb6	TCGA	Cancer	Rectum Adenocarcinoma	Colorectal	Colorectal	female	Colorectal Rectum Adenocarcinoma
910004d6-0dab-4f34-b677-cd132d38e512	TCGA	Cancer	Rectum Adenocarcinoma	Colorectal	Colorectal	female	Colorectal Rectum Adenocarcinoma
78d894d6-810a-4c41-890d-e70a620102cf	TCGA	Cancer	Rectum Adenocarcinoma	Colorectal	Colorectal	female	Colorectal Rectum Adenocarcinoma
6eac957b-96a7-4197-a91d-3b0a2bfad86e	TCGA	Cancer	Rectum Adenocarcinoma	Colorectal	Colorectal	female	Colorectal Rectum Adenocarcinoma
d722fb7e-a795-4ded-b39c-5c3c65ae74cf	TCGA	Cancer	Rectum Adenocarcinoma	Colorectal	Colorectal	male	Colorectal Rectum Adenocarcinoma
e50010f1-dab3-4d73-a7eb-d742a62d4918	TCGA	Cancer	Rectum Adenocarcinoma	Colorectal	Colorectal	female	Colorectal Rectum Adenocarcinoma
63e3f82f-f8fd-46cc-9257-15fe79cae5a9	TCGA	Cancer	Rectum Adenocarcinoma	Colorectal	Colorectal	male	Colorectal Rectum Adenocarcinoma
268e2ee4-0169-4454-a576-ff0632601535	TCGA	Cancer	Rectum Adenocarcinoma	Colorectal	Colorectal	male	Colorectal Rectum Adenocarcinoma
8f08aa0a-ce8d-41e2-81d1-bd2e76d57c17	TCGA	Cancer	Rectum Adenocarcinoma	Colorectal	Colorectal	female	Colorectal Rectum Adenocarcinoma
73549b98-6935-4903-ba5f-9d900670fa2f	TCGA	Cancer	Rectum Adenocarcinoma	Colorectal	Colorectal	female	Colorectal Rectum Adenocarcinoma
f72e4c42-4c82-4620-85db-bbd9391fb50d	TCGA	Cancer	Rectum Adenocarcinoma	Colorectal	Colorectal	male	Colorectal Rectum Adenocarcinoma
a61275c1-fc27-41cb-bf18-ac350c908166	TCGA	Cancer	Rectum Adenocarcinoma	Colorectal	Colorectal	male	Colorectal Rectum Adenocarcinoma
0f4add8a-9c66-4442-8807-e0a793906667	TCGA	Cancer	Rectum Adenocarcinoma	Colorectal	Colorectal	female	Colorectal Rectum Adenocarcinoma
84830c4c-6979-461b-a934-f4c90a304503	TCGA	Cancer	Esophageal Carcinoma	Esophagus	Esophagus	male	Esophagus Esophageal Carcinoma
56be11ae-0b98-4e0a-982d-3c6b6e26313c	TCGA	Cancer	Esophageal Carcinoma	Esophagus	Esophagus	female	Esophagus Esophageal Carcinoma
1620a1ba-20aa-4a85-9117-ea4a97f3f261	TCGA	Cancer	Esophageal Carcinoma	Esophagus	Esophagus	male	Esophagus Esophageal Carcinoma
2da968b9-14dd-4985-8940-a562e442c05c	TCGA	Cancer	Esophageal Carcinoma	Esophagus	Esophagus	male	Esophagus Esophageal Carcinoma
819df9ae-865c-409c-a035-7b8ac6b918fc	TCGA	Cancer	Esophageal Carcinoma	Esophagus	Esophagus	male	Esophagus Esophageal Carcinoma
081f8c2a-4e1a-4e1f-8bc0-b21ffcaa0a47	TCGA	Cancer	Esophageal Carcinoma	Esophagus	Esophagus	male	Esophagus Esophageal Carcinoma
2843eec5-2385-4c3c-a8e5-aeabbcd45ecc	TCGA	Cancer	Esophageal Carcinoma	Esophagus	Esophagus	male	Esophagus Esophageal Carcinoma
b71c9e71-44c1-4a46-b720-eb75c2e472d0	TCGA	Cancer	Esophageal Carcinoma	Esophagus	Esophagus	male	Esophagus Esophageal Carcinoma
36256c08-ac0a-484f-b9b1-21b26d01cc43	TCGA	Cancer	Esophageal Carcinoma	Esophagus	Esophagus	female	Esophagus Esophageal Carcinoma
cd67620e-aeac-4f15-9573-9b73d9b570c1	TCGA	Cancer	Esophageal Carcinoma	Esophagus	Esophagus	male	Esophagus Esophageal Carcinoma
141173e0-c488-4f62-a72b-69f4a686eca3	TCGA	Cancer	Esophageal Carcinoma	Esophagus	Esophagus	male	Esophagus Esophageal Carcinoma
760d738c-a504-43c5-a2b3-4b2a74f34d57	TCGA	Cancer	Esophageal Carcinoma	Esophagus	Esophagus	female	Esophagus Esophageal Carcinoma
6577df5d-5ef0-403c-9a58-d20eafa79c2b	TCGA	Cancer	Esophageal Carcinoma	Esophagus	Esophagus	male	Esophagus Esophageal Carcinoma
01dcd46c-af6a-42e2-8aad-e1e7435b93f4	TCGA	Cancer	Esophageal Carcinoma	Esophagus	Esophagus	female	Esophagus Esophageal Carcinoma
7fa9e998-db44-4974-b5cf-7ba5421354f4	TCGA	Cancer	Esophageal Carcinoma	Esophagus	Esophagus	female	Esophagus Esophageal Carcinoma
f8467ed3-0048-46c2-bc9b-451a04c5f768	TCGA	Cancer	Esophageal Carcinoma	Esophagus	Esophagus	male	Esophagus Esophageal Carcinoma
a1ae210e-cfd7-4193-a902-13a91dff3406	TCGA	Cancer	Esophageal Carcinoma	Esophagus	Esophagus	female	Esophagus Esophageal Carcinoma
7e33dfa8-793d-406b-abd8-bb0a282f6da8	TCGA	Cancer	Esophageal Carcinoma	Esophagus	Esophagus	female	Esophagus Esophageal Carcinoma
0c122f9c-e1eb-46cc-86a2-a44278ebc8e8	TCGA	Cancer	Esophageal Carcinoma	Esophagus	Esophagus	male	Esophagus Esophageal Carcinoma
33b9406d-a6bf-471e-95d5-58a1aa35ca0d	TCGA	Cancer	Esophageal Carcinoma	Esophagus	Esophagus	female	Esophagus Esophageal Carcinoma
bc8ee78a-a5d7-49c5-a57e-74a19ea7f549	TCGA	Cancer	Esophageal Carcinoma	Esophagus	Esophagus	female	Esophagus Esophageal Carcinoma
0a9c8096-9273-45af-bee5-45af0e1bc938	TCGA	Cancer	Esophageal Carcinoma	Esophagus	Esophagus	female	Esophagus Esophageal Carcinoma
5db94003-cda3-4711-841e-d54c81c0632d	TCGA	Cancer	Esophageal Carcinoma	Esophagus	Esophagus	female	Esophagus Esophageal Carcinoma
b24cd5a6-5b39-43e9-a390-a6dc136cff72	TCGA	Cancer	Esophageal Carcinoma	Esophagus	Esophagus	female	Esophagus Esophageal Carcinoma
e08ea2d7-866b-41f6-bedc-0471a7e756a2	TCGA	Cancer	Uveal Melanoma	Eye	Eye	female	Eye Uveal Melanoma
f7e766d8-54e9-4018-8d4e-7d482d24dafa	TCGA	Cancer	Uveal Melanoma	Eye	Eye	male	Eye Uveal Melanoma
4d78b46c-127b-4d9e-a308-0b0bb9d680f9	TCGA	Cancer	Uveal Melanoma	Eye	Eye	male	Eye Uveal Melanoma
e7b513d3-a251-49fe-a06a-a2642ff77f65	TCGA	Cancer	Uveal Melanoma	Eye	Eye	female	Eye Uveal Melanoma
8327c561-9a8c-40de-9ce4-b21227433b0d	TCGA	Cancer	Uveal Melanoma	Eye	Eye	male	Eye Uveal Melanoma
8120173e-e0ad-4722-969b-482253b563cc	TCGA	Cancer	Uveal Melanoma	Eye	Eye	male	Eye Uveal Melanoma
b783ea3a-480f-4a16-b4cc-3bff24bcc159	TCGA	Cancer	Uveal Melanoma	Eye	Eye	female	Eye Uveal Melanoma
ac6e67a3-d0d0-41c5-b74e-4cd4c22c04f0	TCGA	Cancer	Uveal Melanoma	Eye	Eye	male	Eye Uveal Melanoma
8c913ce7-992d-4ede-bb7c-4dfb9b38ec02	TCGA	Cancer	Uveal Melanoma	Eye	Eye	male	Eye Uveal Melanoma
5924f40c-571a-4a87-8c8f-60ac90a85600	TCGA	Cancer	Uveal Melanoma	Eye	Eye	male	Eye Uveal Melanoma
b37d35cb-c9f4-407d-8988-e6b6ffc43ce1	TCGA	Cancer	Uveal Melanoma	Eye	Eye	male	Eye Uveal Melanoma
c2ee73ed-a06c-437f-abb7-94aafdb606ec	TCGA	Cancer	Uveal Melanoma	Eye	Eye	male	Eye Uveal Melanoma
a6f48ba2-ffd8-4e8b-b500-e5528402c835	TCGA	Cancer	Uveal Melanoma	Eye	Eye	female	Eye Uveal Melanoma
b071386e-c195-40a0-a6e6-c93bda019c49	TCGA	Cancer	Uveal Melanoma	Eye	Eye	male	Eye Uveal Melanoma
1084c723-1f84-4088-ab93-ad02e2f18a04	TCGA	Cancer	Uveal Melanoma	Eye	Eye	female	Eye Uveal Melanoma
5e554716-fa3f-4c48-b7a4-4d70dbdab96f	TCGA	Cancer	Uveal Melanoma	Eye	Eye	female	Eye Uveal Melanoma
589902c7-7c0f-48bd-a2db-4ec14acc308a	TCGA	Cancer	Uveal Melanoma	Eye	Eye	female	Eye Uveal Melanoma
e8021913-3dc5-4bee-92ce-4c990ef46f30	TCGA	Cancer	Uveal Melanoma	Eye	Eye	female	Eye Uveal Melanoma
56c78ad1-d1e3-41cb-a335-3880dde784a1	TCGA	Cancer	Uveal Melanoma	Eye	Eye	female	Eye Uveal Melanoma
61f02a4e-6aa3-455f-be4a-567aee1b14c4	TCGA	Cancer	Uveal Melanoma	Eye	Eye	female	Eye Uveal Melanoma
8afe9207-1e5c-45a3-9582-0c51e2398e8f	TCGA	Cancer	Uveal Melanoma	Eye	Eye	male	Eye Uveal Melanoma
80e5718d-3a3c-4bb4-a5c3-634b78810b2f	TCGA	Cancer	Uveal Melanoma	Eye	Eye	male	Eye Uveal Melanoma
8d79739a-c20d-4458-b99a-b518a39bfadb	TCGA	Cancer	Uveal Melanoma	Eye	Eye	male	Eye Uveal Melanoma
6d5d3517-85e9-4bf7-9722-cb42fab73c74	TCGA	Cancer	Uveal Melanoma	Eye	Eye	male	Eye Uveal Melanoma
fce14f03-79d9-4305-ac9d-2b30cae34f93	TCGA	Cancer	Head and Neck Squamous Cell Carcinoma	Head and Neck	Head and Neck	female	Head and Neck Head and Neck Squamous Cell Carcinoma
724060e0-b4a8-485d-a5ac-04b5839be439	TCGA	Cancer	Head and Neck Squamous Cell Carcinoma	Head and Neck	Head and Neck	female	Head and Neck Head and Neck Squamous Cell Carcinoma
8b65268c-72b1-4dba-936f-1a84ceec8a05	TCGA	Cancer	Head and Neck Squamous Cell Carcinoma	Head and Neck	Head and Neck	female	Head and Neck Head and Neck Squamous Cell Carcinoma
d70c2ae7-118a-4df1-aa9b-e9045538e1fa	TCGA	Cancer	Head and Neck Squamous Cell Carcinoma	Head and Neck	Head and Neck	female	Head and Neck Head and Neck Squamous Cell Carcinoma
eee81a55-940a-4381-bb4a-aed860afe29d	TCGA	Cancer	Head and Neck Squamous Cell Carcinoma	Head and Neck	Head and Neck	male	Head and Neck Head and Neck Squamous Cell Carcinoma
9f234c31-fbf7-4f70-afde-714f7620d86e	TCGA	Cancer	Head and Neck Squamous Cell Carcinoma	Head and Neck	Head and Neck	male	Head and Neck Head and Neck Squamous Cell Carcinoma
52fd89e1-9f7d-4422-a7b8-ad021debbfe1	TCGA	Cancer	Head and Neck Squamous Cell Carcinoma	Head and Neck	Head and Neck	male	Head and Neck Head and Neck Squamous Cell Carcinoma
fbd9ce12-1166-44f7-aec4-0b02e85f0835	TCGA	Cancer	Head and Neck Squamous Cell Carcinoma	Head and Neck	Head and Neck	male	Head and Neck Head and Neck Squamous Cell Carcinoma
d9361138-2179-4c25-a750-6aab27f41e69	TCGA	Cancer	Head and Neck Squamous Cell Carcinoma	Head and Neck	Head and Neck	male	Head and Neck Head and Neck Squamous Cell Carcinoma
9dea4460-9ef7-487e-b997-de68fc4fc6af	TCGA	Cancer	Head and Neck Squamous Cell Carcinoma	Head and Neck	Head and Neck	male	Head and Neck Head and Neck Squamous Cell Carcinoma
d68a4a32-b855-42b8-b199-eb4ca55f528f	TCGA	Cancer	Head and Neck Squamous Cell Carcinoma	Head and Neck	Head and Neck	male	Head and Neck Head and Neck Squamous Cell Carcinoma
b3b3fecb-48b0-417a-bdf0-ebadb5cb470b	TCGA	Cancer	Head and Neck Squamous Cell Carcinoma	Head and Neck	Head and Neck	female	Head and Neck Head and Neck Squamous Cell Carcinoma
3a7cde69-256a-4573-95bb-a631621c6617	TCGA	Cancer	Head and Neck Squamous Cell Carcinoma	Head and Neck	Head and Neck	female	Head and Neck Head and Neck Squamous Cell Carcinoma
223119ad-1d17-4a43-8792-2b27c0cf5f43	TCGA	Cancer	Head and Neck Squamous Cell Carcinoma	Head and Neck	Head and Neck	female	Head and Neck Head and Neck Squamous Cell Carcinoma
ab08bb37-c1bb-4554-80a8-e983d8d6d5e3	TCGA	Cancer	Head and Neck Squamous Cell Carcinoma	Head and Neck	Head and Neck	male	Head and Neck Head and Neck Squamous Cell Carcinoma
ab838180-3da7-493f-8410-b1564abcb511	TCGA	Cancer	Head and Neck Squamous Cell Carcinoma	Head and Neck	Head and Neck	female	Head and Neck Head and Neck Squamous Cell Carcinoma
48350bd7-7cd2-4511-9c81-bc821c15864e	TCGA	Cancer	Head and Neck Squamous Cell Carcinoma	Head and Neck	Head and Neck	female	Head and Neck Head and Neck Squamous Cell Carcinoma
ef110e9b-582c-4a57-9317-3ec99a4cc007	TCGA	Cancer	Head and Neck Squamous Cell Carcinoma	Head and Neck	Head and Neck	female	Head and Neck Head and Neck Squamous Cell Carcinoma
b79a37d9-56f2-4e9a-8fdc-ee1ba1634cf2	TCGA	Cancer	Head and Neck Squamous Cell Carcinoma	Head and Neck	Head and Neck	male	Head and Neck Head and Neck Squamous Cell Carcinoma
bb871040-afa6-41eb-baaf-f2f61c61765c	TCGA	Cancer	Head and Neck Squamous Cell Carcinoma	Head and Neck	Head and Neck	male	Head and Neck Head and Neck Squamous Cell Carcinoma
31da43ba-a51c-41d0-a609-30ba6d1e1bc0	TCGA	Cancer	Head and Neck Squamous Cell Carcinoma	Head and Neck	Head and Neck	male	Head and Neck Head and Neck Squamous Cell Carcinoma
05badd38-e1fc-4d42-9712-046073cc1008	TCGA	Cancer	Head and Neck Squamous Cell Carcinoma	Head and Neck	Head and Neck	female	Head and Neck Head and Neck Squamous Cell Carcinoma
9c97fbc3-6296-4410-b7bb-a0c21c15586b	TCGA	Cancer	Head and Neck Squamous Cell Carcinoma	Head and Neck	Head and Neck	male	Head and Neck Head and Neck Squamous Cell Carcinoma
bfa87f1c-e1ca-4d38-ad60-d8151bd398d9	TCGA	Cancer	Head and Neck Squamous Cell Carcinoma	Head and Neck	Head and Neck	female	Head and Neck Head and Neck Squamous Cell Carcinoma
10ee6a36-508d-4cd1-8d21-a57d5ff59291	TCGA	Cancer	Kidney Renal Clear Cell Carcinoma	Kidney	Kidney	male	Kidney Kidney Renal Clear Cell Carcinoma
3b61c256-387d-4bb8-866e-68a5c0173654	TCGA	Cancer	Kidney Renal Clear Cell Carcinoma	Kidney	Kidney	male	Kidney Kidney Renal Clear Cell Carcinoma
7d81a6c5-d44c-498c-bda4-75cde5b88e23	TCGA	Cancer	Kidney Renal Clear Cell Carcinoma	Kidney	Kidney	male	Kidney Kidney Renal Clear Cell Carcinoma
7c34b624-5546-4c3a-8886-5913cfc30f02	TCGA	Cancer	Kidney Renal Clear Cell Carcinoma	Kidney	Kidney	female	Kidney Kidney Renal Clear Cell Carcinoma
456a99cb-53ab-4f2a-8c57-7d08fab2fcd3	TCGA	Cancer	Kidney Renal Clear Cell Carcinoma	Kidney	Kidney	male	Kidney Kidney Renal Clear Cell Carcinoma
1f5d00bc-b20e-4396-a727-f3339b36d635	TCGA	Cancer	Kidney Renal Clear Cell Carcinoma	Kidney	Kidney	male	Kidney Kidney Renal Clear Cell Carcinoma
60c630bf-a701-42ea-8102-0be182dc5497	TCGA	Cancer	Kidney Renal Clear Cell Carcinoma	Kidney	Kidney	female	Kidney Kidney Renal Clear Cell Carcinoma
450b2028-0e46-4ce6-b99f-7fb1f52e542a	TCGA	Cancer	Kidney Renal Clear Cell Carcinoma	Kidney	Kidney	female	Kidney Kidney Renal Clear Cell Carcinoma
52d0cf8a-f407-4964-99e2-dd16bd8106e4	TCGA	Cancer	Kidney Renal Clear Cell Carcinoma	Kidney	Kidney	male	Kidney Kidney Renal Clear Cell Carcinoma
6d28f1a8-b53f-42dc-b026-5f03a4d4c34f	TCGA	Cancer	Kidney Renal Clear Cell Carcinoma	Kidney	Kidney	female	Kidney Kidney Renal Clear Cell Carcinoma
784dd199-3b19-4b0d-a25a-d98c0aa23d4a	TCGA	Cancer	Kidney Renal Clear Cell Carcinoma	Kidney	Kidney	female	Kidney Kidney Renal Clear Cell Carcinoma
c6ac32f8-9f06-48b1-a84f-83df6e9c320f	TCGA	Cancer	Kidney Renal Clear Cell Carcinoma	Kidney	Kidney	male	Kidney Kidney Renal Clear Cell Carcinoma
3804393d-802f-4544-b3c2-c8e6f68c452e	TCGA	Cancer	Kidney Renal Clear Cell Carcinoma	Kidney	Kidney	female	Kidney Kidney Renal Clear Cell Carcinoma
fa5d2cb0-703c-4fbf-8b4a-d949d7819eba	TCGA	Cancer	Kidney Renal Clear Cell Carcinoma	Kidney	Kidney	female	Kidney Kidney Renal Clear Cell Carcinoma
891484bc-8ef7-4047-bae5-5efd7eac7c96	TCGA	Cancer	Kidney Renal Clear Cell Carcinoma	Kidney	Kidney	male	Kidney Kidney Renal Clear Cell Carcinoma
1e557b85-4efb-4c8f-a4ef-fb2164ceb5d9	TCGA	Cancer	Kidney Renal Clear Cell Carcinoma	Kidney	Kidney	female	Kidney Kidney Renal Clear Cell Carcinoma
9a555a3a-a530-4c1d-953f-b9114ad0e7b2	TCGA	Cancer	Kidney Renal Clear Cell Carcinoma	Kidney	Kidney	male	Kidney Kidney Renal Clear Cell Carcinoma
8fd96c78-0868-4961-8593-ad04462e1ec0	TCGA	Cancer	Kidney Renal Clear Cell Carcinoma	Kidney	Kidney	female	Kidney Kidney Renal Clear Cell Carcinoma
c431ff32-5d09-426a-bfb5-af6a82b693a0	TCGA	Cancer	Kidney Renal Clear Cell Carcinoma	Kidney	Kidney	male	Kidney Kidney Renal Clear Cell Carcinoma
61d51754-0787-4d43-a710-c2dc052db2ef	TCGA	Cancer	Kidney Renal Clear Cell Carcinoma	Kidney	Kidney	male	Kidney Kidney Renal Clear Cell Carcinoma
7336eaf8-7ace-439f-a2e1-4167c836919e	TCGA	Cancer	Kidney Renal Clear Cell Carcinoma	Kidney	Kidney	female	Kidney Kidney Renal Clear Cell Carcinoma
d5989af8-909b-4a0c-8889-a8fcd62e3106	TCGA	Cancer	Kidney Renal Clear Cell Carcinoma	Kidney	Kidney	male	Kidney Kidney Renal Clear Cell Carcinoma
baa35259-3525-4599-9c50-1d7e0bfbf985	TCGA	Cancer	Kidney Renal Clear Cell Carcinoma	Kidney	Kidney	female	Kidney Kidney Renal Clear Cell Carcinoma
c9c33366-468d-424d-b59f-2cd90de8376f	TCGA	Cancer	Kidney Renal Clear Cell Carcinoma	Kidney	Kidney	female	Kidney Kidney Renal Clear Cell Carcinoma
d69f87da-af27-45bc-9bb5-3e80cf8a2fad	TCGA	Cancer	Kidney Renal Papillary Cell Carcinoma	Kidney	Kidney	female	Kidney Kidney Renal Papillary Cell Carcinoma
e67a4226-4bf6-4c1d-a26c-f257dbd43210	TCGA	Cancer	Kidney Renal Papillary Cell Carcinoma	Kidney	Kidney	female	Kidney Kidney Renal Papillary Cell Carcinoma
867cea75-25bb-4775-b7ee-63a2dd724b24	TCGA	Cancer	Kidney Renal Papillary Cell Carcinoma	Kidney	Kidney	male	Kidney Kidney Renal Papillary Cell Carcinoma
3b8b0267-9451-41f6-91bc-894d581a32d5	TCGA	Cancer	Kidney Renal Papillary Cell Carcinoma	Kidney	Kidney	male	Kidney Kidney Renal Papillary Cell Carcinoma
d8b01bb7-1bac-4982-8062-c3185f536c5c	TCGA	Cancer	Kidney Renal Papillary Cell Carcinoma	Kidney	Kidney	female	Kidney Kidney Renal Papillary Cell Carcinoma
931e349a-07c1-4bf2-8ac2-95163d66b9f5	TCGA	Cancer	Kidney Renal Papillary Cell Carcinoma	Kidney	Kidney	female	Kidney Kidney Renal Papillary Cell Carcinoma
dc5d11b5-742f-4740-acd0-2806962d9d1b	TCGA	Cancer	Kidney Renal Papillary Cell Carcinoma	Kidney	Kidney	male	Kidney Kidney Renal Papillary Cell Carcinoma
a06113d4-f569-437a-98fc-f4fa43c105c8	TCGA	Cancer	Kidney Renal Papillary Cell Carcinoma	Kidney	Kidney	female	Kidney Kidney Renal Papillary Cell Carcinoma
5681bf46-da31-43d0-b340-84456abedfa0	TCGA	Cancer	Kidney Renal Papillary Cell Carcinoma	Kidney	Kidney	male	Kidney Kidney Renal Papillary Cell Carcinoma
7d5abc6a-c4d5-4bb5-bcf0-8ad7a75691a1	TCGA	Cancer	Kidney Renal Papillary Cell Carcinoma	Kidney	Kidney	female	Kidney Kidney Renal Papillary Cell Carcinoma
2d2bc70e-9078-47d3-8f08-418d6ab9c8c1	TCGA	Cancer	Kidney Renal Papillary Cell Carcinoma	Kidney	Kidney	female	Kidney Kidney Renal Papillary Cell Carcinoma
44bd908e-c082-4877-ba18-13a153d3f642	TCGA	Cancer	Kidney Renal Papillary Cell Carcinoma	Kidney	Kidney	female	Kidney Kidney Renal Papillary Cell Carcinoma
d7eb0631-a882-446e-ab1f-71b260f0c631	TCGA	Cancer	Kidney Renal Papillary Cell Carcinoma	Kidney	Kidney	male	Kidney Kidney Renal Papillary Cell Carcinoma
48509321-6db5-4494-b852-51a98dbfaba1	TCGA	Cancer	Kidney Renal Papillary Cell Carcinoma	Kidney	Kidney	male	Kidney Kidney Renal Papillary Cell Carcinoma
4c2ee28f-c2b7-4909-884e-c200469a28d6	TCGA	Cancer	Kidney Renal Papillary Cell Carcinoma	Kidney	Kidney	male	Kidney Kidney Renal Papillary Cell Carcinoma
d5dc26b3-b709-405f-9dfe-295089ec2ce1	TCGA	Cancer	Kidney Renal Papillary Cell Carcinoma	Kidney	Kidney	male	Kidney Kidney Renal Papillary Cell Carcinoma
753f54d4-1994-4a3a-adeb-a37df28973d6	TCGA	Cancer	Kidney Renal Papillary Cell Carcinoma	Kidney	Kidney	male	Kidney Kidney Renal Papillary Cell Carcinoma
db7d44cb-0fa8-4529-9105-d377e8ff1762	TCGA	Cancer	Kidney Renal Papillary Cell Carcinoma	Kidney	Kidney	male	Kidney Kidney Renal Papillary Cell Carcinoma
98acdadf-fd25-4344-8e99-c0b676806bf1	TCGA	Cancer	Kidney Renal Papillary Cell Carcinoma	Kidney	Kidney	female	Kidney Kidney Renal Papillary Cell Carcinoma
291bab1e-5d83-4b8f-9212-ecec1278ea1a	TCGA	Cancer	Kidney Renal Papillary Cell Carcinoma	Kidney	Kidney	male	Kidney Kidney Renal Papillary Cell Carcinoma
3f8417c4-b91b-4255-8db8-fd16f922598e	TCGA	Cancer	Kidney Renal Papillary Cell Carcinoma	Kidney	Kidney	male	Kidney Kidney Renal Papillary Cell Carcinoma
8d66c918-9556-4963-96eb-1633b6e3ca19	TCGA	Cancer	Kidney Renal Papillary Cell Carcinoma	Kidney	Kidney	female	Kidney Kidney Renal Papillary Cell Carcinoma
8ce0c0f7-35db-4a0f-8305-bf2dd9ab12a1	TCGA	Cancer	Kidney Renal Papillary Cell Carcinoma	Kidney	Kidney	female	Kidney Kidney Renal Papillary Cell Carcinoma
50e72f2a-feb5-4fe8-b6c3-5b70f8916e0e	TCGA	Cancer	Kidney Renal Papillary Cell Carcinoma	Kidney	Kidney	female	Kidney Kidney Renal Papillary Cell Carcinoma
637d4348-c79a-46ab-9865-811e7dc1edb9	TCGA	Cancer	Liver Hepatocellular Carcinoma	Liver	Liver	male	Liver Liver Hepatocellular Carcinoma
36a626db-93d5-4947-8c63-160d86762802	TCGA	Cancer	Liver Hepatocellular Carcinoma	Liver	Liver	male	Liver Liver Hepatocellular Carcinoma
b1c20c05-f7c1-4791-9fb3-90df7e152fff	TCGA	Cancer	Liver Hepatocellular Carcinoma	Liver	Liver	male	Liver Liver Hepatocellular Carcinoma
dad4d80c-0c46-4e06-b82f-4bb9433d8fe6	TCGA	Cancer	Liver Hepatocellular Carcinoma	Liver	Liver	female	Liver Liver Hepatocellular Carcinoma
26b5af69-e378-4508-8b7a-6ef5a77354f4	TCGA	Cancer	Liver Hepatocellular Carcinoma	Liver	Liver	female	Liver Liver Hepatocellular Carcinoma
1cf999f1-480f-4a87-abb6-ff7e059b85da	TCGA	Cancer	Liver Hepatocellular Carcinoma	Liver	Liver	female	Liver Liver Hepatocellular Carcinoma
2ac9ffae-75ce-43f3-800e-76e3a18cac9d	TCGA	Cancer	Liver Hepatocellular Carcinoma	Liver	Liver	male	Liver Liver Hepatocellular Carcinoma
4a630650-e3ee-4b38-89d2-4bd9af19df39	TCGA	Cancer	Liver Hepatocellular Carcinoma	Liver	Liver	male	Liver Liver Hepatocellular Carcinoma
d083a68f-f1d2-4179-8461-fb85df9c7417	TCGA	Cancer	Liver Hepatocellular Carcinoma	Liver	Liver	female	Liver Liver Hepatocellular Carcinoma
7dce9ce8-0f11-4b8e-a906-1cae3034147b	TCGA	Cancer	Liver Hepatocellular Carcinoma	Liver	Liver	female	Liver Liver Hepatocellular Carcinoma
0e5f4da6-794c-4b1a-91b4-e115dfc1e53c	TCGA	Cancer	Liver Hepatocellular Carcinoma	Liver	Liver	male	Liver Liver Hepatocellular Carcinoma
c35fda58-2581-48c8-9f48-c8758a040460	TCGA	Cancer	Liver Hepatocellular Carcinoma	Liver	Liver	female	Liver Liver Hepatocellular Carcinoma
a98faab0-6c01-4030-b062-966190c104e8	TCGA	Cancer	Liver Hepatocellular Carcinoma	Liver	Liver	female	Liver Liver Hepatocellular Carcinoma
6ff61549-59da-468e-8ec3-a48bb246343e	TCGA	Cancer	Liver Hepatocellular Carcinoma	Liver	Liver	male	Liver Liver Hepatocellular Carcinoma
ddf5ba12-3a89-47d0-964e-4ea1773d7c43	TCGA	Cancer	Liver Hepatocellular Carcinoma	Liver	Liver	female	Liver Liver Hepatocellular Carcinoma
ba4c43bb-ba6a-486e-9a16-87515adf54ff	TCGA	Cancer	Liver Hepatocellular Carcinoma	Liver	Liver	male	Liver Liver Hepatocellular Carcinoma
d75bf376-5eb3-47af-9524-5c8ca9d1961b	TCGA	Cancer	Liver Hepatocellular Carcinoma	Liver	Liver	male	Liver Liver Hepatocellular Carcinoma
a799d286-cfff-40cb-99aa-250637383ca7	TCGA	Cancer	Liver Hepatocellular Carcinoma	Liver	Liver	male	Liver Liver Hepatocellular Carcinoma
49ff6102-c413-43e8-8ea8-54cda1e5201c	TCGA	Cancer	Liver Hepatocellular Carcinoma	Liver	Liver	female	Liver Liver Hepatocellular Carcinoma
477ad562-2728-4499-a3cf-ac009624744f	TCGA	Cancer	Liver Hepatocellular Carcinoma	Liver	Liver	male	Liver Liver Hepatocellular Carcinoma
4af307e4-e264-4dfa-b1a9-f6616e702b36	TCGA	Cancer	Liver Hepatocellular Carcinoma	Liver	Liver	female	Liver Liver Hepatocellular Carcinoma
670feb21-7910-4b76-8ac4-29edb2772542	TCGA	Cancer	Liver Hepatocellular Carcinoma	Liver	Liver	female	Liver Liver Hepatocellular Carcinoma
557b709b-a277-4bc4-8c9d-dadc6d3fa15a	TCGA	Cancer	Liver Hepatocellular Carcinoma	Liver	Liver	female	Liver Liver Hepatocellular Carcinoma
360e019d-258f-4b15-a43e-085840f38fa0	TCGA	Cancer	Liver Hepatocellular Carcinoma	Liver	Liver	male	Liver Liver Hepatocellular Carcinoma
bf42e41f-19ac-40c7-abde-ee23378f4606	TCGA	Cancer	Lung Adenocarcinoma	Lung	Lung	female	Lung Lung Adenocarcinoma
55427b1d-4160-45fd-a5d4-a72d724e87b4	TCGA	Cancer	Lung Adenocarcinoma	Lung	Lung	female	Lung Lung Adenocarcinoma
df3bbe0f-5c32-4a81-9826-95ddf6c023d9	TCGA	Cancer	Lung Adenocarcinoma	Lung	Lung	male	Lung Lung Adenocarcinoma
e61b8a2e-0004-4dec-ac69-8a6f1bd91267	TCGA	Cancer	Lung Adenocarcinoma	Lung	Lung	female	Lung Lung Adenocarcinoma
0330e749-318e-4de9-9c99-1443594b6360	TCGA	Cancer	Lung Adenocarcinoma	Lung	Lung	female	Lung Lung Adenocarcinoma
38dc8f73-a4ec-4f38-a612-11cf1faa1d8d	TCGA	Cancer	Lung Adenocarcinoma	Lung	Lung	female	Lung Lung Adenocarcinoma
c724c63a-bd1c-4c3a-bb6e-a45851bc1cff	TCGA	Cancer	Lung Adenocarcinoma	Lung	Lung	male	Lung Lung Adenocarcinoma
815e2d8c-0ef5-4600-a6fb-d5878a67bee2	TCGA	Cancer	Lung Adenocarcinoma	Lung	Lung	male	Lung Lung Adenocarcinoma
3d2b7c58-6ae8-4199-8782-b4c37b52e757	TCGA	Cancer	Lung Adenocarcinoma	Lung	Lung	male	Lung Lung Adenocarcinoma
67e31df5-7c79-4f2c-ad71-1a4bc376c728	TCGA	Cancer	Lung Adenocarcinoma	Lung	Lung	female	Lung Lung Adenocarcinoma
2a8cf710-6197-4a1c-b7b3-97bbb975c715	TCGA	Cancer	Lung Adenocarcinoma	Lung	Lung	male	Lung Lung Adenocarcinoma
1bdf64ba-0881-4ab3-a2e6-e8c38d925e45	TCGA	Cancer	Lung Adenocarcinoma	Lung	Lung	male	Lung Lung Adenocarcinoma
346dd6ea-76b5-4e01-926d-07832d3a76c4	TCGA	Cancer	Lung Adenocarcinoma	Lung	Lung	female	Lung Lung Adenocarcinoma
5a66bb8d-7df6-4655-806d-1451370d27a9	TCGA	Cancer	Lung Adenocarcinoma	Lung	Lung	female	Lung Lung Adenocarcinoma
c0c2b41b-a1ab-4807-8884-031bcf0f2d78	TCGA	Cancer	Lung Adenocarcinoma	Lung	Lung	male	Lung Lung Adenocarcinoma
b2b94908-945e-4a92-add4-e658d5a675f9	TCGA	Cancer	Lung Adenocarcinoma	Lung	Lung	male	Lung Lung Adenocarcinoma
51ccb3d6-e0d2-4729-991e-46809c28a463	TCGA	Cancer	Lung Adenocarcinoma	Lung	Lung	female	Lung Lung Adenocarcinoma
89b85540-2c4d-4f9a-8ca1-f5f4d96485f2	TCGA	Cancer	Lung Adenocarcinoma	Lung	Lung	female	Lung Lung Adenocarcinoma
4710fc26-1185-4436-b315-db0380bd9080	TCGA	Cancer	Lung Adenocarcinoma	Lung	Lung	female	Lung Lung Adenocarcinoma
c4ad66f0-aeaa-4403-83f2-9de01fbdf121	TCGA	Cancer	Lung Adenocarcinoma	Lung	Lung	male	Lung Lung Adenocarcinoma
b4f01540-6a25-4ef6-8903-d74d639b1a2c	TCGA	Cancer	Lung Adenocarcinoma	Lung	Lung	male	Lung Lung Adenocarcinoma
418985cf-3f58-4673-9303-961204e7c470	TCGA	Cancer	Lung Adenocarcinoma	Lung	Lung	male	Lung Lung Adenocarcinoma
7e92084b-a836-48c0-8868-5704aae62707	TCGA	Cancer	Lung Adenocarcinoma	Lung	Lung	male	Lung Lung Adenocarcinoma
97213ae3-3d55-4d5c-9ab7-aaedb58adf91	TCGA	Cancer	Lung Adenocarcinoma	Lung	Lung	female	Lung Lung Adenocarcinoma
45acfa1b-73d7-40c3-a607-1a72b5e70b68	TCGA	Cancer	Lung Squamous Cell Carcinoma	Lung	Lung	male	Lung Lung Squamous Cell Carcinoma
75b2dcfb-a7e8-4f5a-8816-17331d712397	TCGA	Cancer	Lung Squamous Cell Carcinoma	Lung	Lung	female	Lung Lung Squamous Cell Carcinoma
7898e54d-0c7e-48e6-bea8-8778f42ab57c	TCGA	Cancer	Lung Squamous Cell Carcinoma	Lung	Lung	male	Lung Lung Squamous Cell Carcinoma
0f333474-d7f2-4eec-bc4d-fc45d7e662a5	TCGA	Cancer	Lung Squamous Cell Carcinoma	Lung	Lung	female	Lung Lung Squamous Cell Carcinoma
0eb189b3-3ad2-4875-b1ae-df2117455faf	TCGA	Cancer	Lung Squamous Cell Carcinoma	Lung	Lung	male	Lung Lung Squamous Cell Carcinoma
ae4c219c-a365-4bdf-bbe3-2b4fc9574548	TCGA	Cancer	Lung Squamous Cell Carcinoma	Lung	Lung	female	Lung Lung Squamous Cell Carcinoma
1618c282-64d7-4a0b-bd84-895642c790bb	TCGA	Cancer	Lung Squamous Cell Carcinoma	Lung	Lung	male	Lung Lung Squamous Cell Carcinoma
62e52662-52a0-4c71-b527-6b5ca3197d39	TCGA	Cancer	Lung Squamous Cell Carcinoma	Lung	Lung	female	Lung Lung Squamous Cell Carcinoma
1280e632-dde5-4268-b883-7d2e9e796cb6	TCGA	Cancer	Lung Squamous Cell Carcinoma	Lung	Lung	female	Lung Lung Squamous Cell Carcinoma
a5776667-a937-4fd7-90f2-d8e95092affd	TCGA	Cancer	Lung Squamous Cell Carcinoma	Lung	Lung	male	Lung Lung Squamous Cell Carcinoma
7cfe090f-f275-4802-91e2-545be65208c2	TCGA	Cancer	Lung Squamous Cell Carcinoma	Lung	Lung	male	Lung Lung Squamous Cell Carcinoma
d72704a2-9a82-411d-bcf7-5bd1241babb9	TCGA	Cancer	Lung Squamous Cell Carcinoma	Lung	Lung	male	Lung Lung Squamous Cell Carcinoma
7664932f-1aee-4393-b4fc-5675d22c8069	TCGA	Cancer	Lung Squamous Cell Carcinoma	Lung	Lung	female	Lung Lung Squamous Cell Carcinoma
7f37d4d0-be8b-4f0f-a2eb-d7368e279f04	TCGA	Cancer	Lung Squamous Cell Carcinoma	Lung	Lung	female	Lung Lung Squamous Cell Carcinoma
fc1b071f-3bc2-4748-8c58-8abe1d1e9e2f	TCGA	Cancer	Lung Squamous Cell Carcinoma	Lung	Lung	male	Lung Lung Squamous Cell Carcinoma
23a41468-c57d-4870-97b6-db948c879a08	TCGA	Cancer	Lung Squamous Cell Carcinoma	Lung	Lung	male	Lung Lung Squamous Cell Carcinoma
4e0e4980-35ee-409c-b6ac-07ec6f8a9713	TCGA	Cancer	Lung Squamous Cell Carcinoma	Lung	Lung	male	Lung Lung Squamous Cell Carcinoma
438eed4e-31fc-41fb-b085-fc3c3f740308	TCGA	Cancer	Lung Squamous Cell Carcinoma	Lung	Lung	male	Lung Lung Squamous Cell Carcinoma
3f9360be-22d3-420b-9511-14ceb76f7426	TCGA	Cancer	Lung Squamous Cell Carcinoma	Lung	Lung	male	Lung Lung Squamous Cell Carcinoma
34b0b132-4cd6-4804-90d3-82b3a0e4be86	TCGA	Cancer	Lung Squamous Cell Carcinoma	Lung	Lung	female	Lung Lung Squamous Cell Carcinoma
46671196-61ca-4557-b285-02694826df5a	TCGA	Cancer	Lung Squamous Cell Carcinoma	Lung	Lung	female	Lung Lung Squamous Cell Carcinoma
9fb85109-c368-4fa0-ab7c-c3e38e5b1f3c	TCGA	Cancer	Lung Squamous Cell Carcinoma	Lung	Lung	female	Lung Lung Squamous Cell Carcinoma
c727b1d1-ba95-47cd-9082-4d4e5c3e66b0	TCGA	Cancer	Lung Squamous Cell Carcinoma	Lung	Lung	female	Lung Lung Squamous Cell Carcinoma
93d5b379-fb1d-4c10-b6b6-0cc1e831f078	TCGA	Cancer	Lung Squamous Cell Carcinoma	Lung	Lung	female	Lung Lung Squamous Cell Carcinoma
5ee2b314-52bd-44c8-8387-00d201d10b17	TCGA	Cancer	Lymphoid Neoplasm Diffuse Large B-cell Lymphoma	Lymph Nodes	Lymph Nodes	female	Lymph Nodes Lymphoid Neoplasm Diffuse Large B-cell Lymphoma
2246051d-af05-45c9-95ac-c1ee7bdb3f0c	TCGA	Cancer	Lymphoid Neoplasm Diffuse Large B-cell Lymphoma	Lymph Nodes	Lymph Nodes	male	Lymph Nodes Lymphoid Neoplasm Diffuse Large B-cell Lymphoma
116af6e7-a7b3-4fa0-968f-93e6549bd0dc	TCGA	Cancer	Lymphoid Neoplasm Diffuse Large B-cell Lymphoma	Lymph Nodes	Lymph Nodes	male	Lymph Nodes Lymphoid Neoplasm Diffuse Large B-cell Lymphoma
83e80786-cf95-4373-befa-344d036ae5bf	TCGA	Cancer	Lymphoid Neoplasm Diffuse Large B-cell Lymphoma	Lymph Nodes	Lymph Nodes	female	Lymph Nodes Lymphoid Neoplasm Diffuse Large B-cell Lymphoma
45463b7c-3817-41da-9e1d-aac153faae07	TCGA	Cancer	Lymphoid Neoplasm Diffuse Large B-cell Lymphoma	Lymph Nodes	Lymph Nodes	male	Lymph Nodes Lymphoid Neoplasm Diffuse Large B-cell Lymphoma
590ac1ac-e95d-4d96-bdb0-f4f30bd6d078	TCGA	Cancer	Lymphoid Neoplasm Diffuse Large B-cell Lymphoma	Lymph Nodes	Lymph Nodes	male	Lymph Nodes Lymphoid Neoplasm Diffuse Large B-cell Lymphoma
060a1227-3002-4a79-a94b-353620131377	TCGA	Cancer	Lymphoid Neoplasm Diffuse Large B-cell Lymphoma	Lymph Nodes	Lymph Nodes	female	Lymph Nodes Lymphoid Neoplasm Diffuse Large B-cell Lymphoma
12fa76d0-f820-4a87-a84a-495ac9966e05	TCGA	Cancer	Lymphoid Neoplasm Diffuse Large B-cell Lymphoma	Lymph Nodes	Lymph Nodes	female	Lymph Nodes Lymphoid Neoplasm Diffuse Large B-cell Lymphoma
814e57f2-5e21-4c5f-a03e-82a468ca96bf	TCGA	Cancer	Lymphoid Neoplasm Diffuse Large B-cell Lymphoma	Lymph Nodes	Lymph Nodes	male	Lymph Nodes Lymphoid Neoplasm Diffuse Large B-cell Lymphoma
df9dbdd7-9f38-4ccb-9d70-c88754771766	TCGA	Cancer	Lymphoid Neoplasm Diffuse Large B-cell Lymphoma	Lymph Nodes	Lymph Nodes	female	Lymph Nodes Lymphoid Neoplasm Diffuse Large B-cell Lymphoma
23bf921d-c4e4-458e-aba7-3384d178334d	TCGA	Cancer	Lymphoid Neoplasm Diffuse Large B-cell Lymphoma	Lymph Nodes	Lymph Nodes	female	Lymph Nodes Lymphoid Neoplasm Diffuse Large B-cell Lymphoma
5ea946e8-68e3-4805-aead-f7a93c9fecaa	TCGA	Cancer	Lymphoid Neoplasm Diffuse Large B-cell Lymphoma	Lymph Nodes	Lymph Nodes	female	Lymph Nodes Lymphoid Neoplasm Diffuse Large B-cell Lymphoma
c64ff893-508b-4569-880f-bcbd4b7e08c6	TCGA	Cancer	Lymphoid Neoplasm Diffuse Large B-cell Lymphoma	Lymph Nodes	Lymph Nodes	male	Lymph Nodes Lymphoid Neoplasm Diffuse Large B-cell Lymphoma
e882e2af-e073-4097-9dac-7c15c68ee123	TCGA	Cancer	Lymphoid Neoplasm Diffuse Large B-cell Lymphoma	Lymph Nodes	Lymph Nodes	male	Lymph Nodes Lymphoid Neoplasm Diffuse Large B-cell Lymphoma
e77a06e6-50c6-428e-a32e-61e82c1ad0b9	TCGA	Cancer	Lymphoid Neoplasm Diffuse Large B-cell Lymphoma	Lymph Nodes	Lymph Nodes	male	Lymph Nodes Lymphoid Neoplasm Diffuse Large B-cell Lymphoma
893e1ae4-da42-4a3d-840b-44f849521497	TCGA	Cancer	Lymphoid Neoplasm Diffuse Large B-cell Lymphoma	Lymph Nodes	Lymph Nodes	female	Lymph Nodes Lymphoid Neoplasm Diffuse Large B-cell Lymphoma
7a1471f5-c86a-4ebc-97fb-d62b41a690ff	TCGA	Cancer	Lymphoid Neoplasm Diffuse Large B-cell Lymphoma	Lymph Nodes	Lymph Nodes	male	Lymph Nodes Lymphoid Neoplasm Diffuse Large B-cell Lymphoma
831363ae-f91b-497f-857a-bd9ac9772b37	TCGA	Cancer	Lymphoid Neoplasm Diffuse Large B-cell Lymphoma	Lymph Nodes	Lymph Nodes	female	Lymph Nodes Lymphoid Neoplasm Diffuse Large B-cell Lymphoma
dbc1dabd-11dc-46db-8114-367d248cffd6	TCGA	Cancer	Lymphoid Neoplasm Diffuse Large B-cell Lymphoma	Lymph Nodes	Lymph Nodes	female	Lymph Nodes Lymphoid Neoplasm Diffuse Large B-cell Lymphoma
15deba77-15f4-4af3-a1f7-878d5acd97b8	TCGA	Cancer	Lymphoid Neoplasm Diffuse Large B-cell Lymphoma	Lymph Nodes	Lymph Nodes	male	Lymph Nodes Lymphoid Neoplasm Diffuse Large B-cell Lymphoma
57a136dd-ead1-46fd-ad39-2eb4ae210c4a	TCGA	Cancer	Lymphoid Neoplasm Diffuse Large B-cell Lymphoma	Lymph Nodes	Lymph Nodes	male	Lymph Nodes Lymphoid Neoplasm Diffuse Large B-cell Lymphoma
876f677c-74df-4bdb-bc65-250248c56d2a	TCGA	Cancer	Lymphoid Neoplasm Diffuse Large B-cell Lymphoma	Lymph Nodes	Lymph Nodes	female	Lymph Nodes Lymphoid Neoplasm Diffuse Large B-cell Lymphoma
825aca58-954f-47cd-902e-136f53d005fc	TCGA	Cancer	Lymphoid Neoplasm Diffuse Large B-cell Lymphoma	Lymph Nodes	Lymph Nodes	male	Lymph Nodes Lymphoid Neoplasm Diffuse Large B-cell Lymphoma
4ccab227-bda2-495d-86b6-47a6f359a443	TCGA	Cancer	Lymphoid Neoplasm Diffuse Large B-cell Lymphoma	Lymph Nodes	Lymph Nodes	female	Lymph Nodes Lymphoid Neoplasm Diffuse Large B-cell Lymphoma
5c361d70-badf-4058-9c03-411ebb2a8d27	TCGA	Cancer	Ovarian Serous Cystadenocarcinoma	Ovary	Ovary	female	Ovary Ovarian Serous Cystadenocarcinoma
05ad07c2-96a8-4337-af45-3e7d662895f3	TCGA	Cancer	Ovarian Serous Cystadenocarcinoma	Ovary	Ovary	female	Ovary Ovarian Serous Cystadenocarcinoma
30452d72-a9d8-4637-85a7-2086d220082a	TCGA	Cancer	Ovarian Serous Cystadenocarcinoma	Ovary	Ovary	female	Ovary Ovarian Serous Cystadenocarcinoma
bf2d7478-d420-401c-9b11-946f483a6eec	TCGA	Cancer	Ovarian Serous Cystadenocarcinoma	Ovary	Ovary	female	Ovary Ovarian Serous Cystadenocarcinoma
d91cfae3-2dfd-4c2b-911a-d5850974e7b0	TCGA	Cancer	Ovarian Serous Cystadenocarcinoma	Ovary	Ovary	female	Ovary Ovarian Serous Cystadenocarcinoma
9dab07e6-38b4-4fc8-8b53-21c47f1b8431	TCGA	Cancer	Ovarian Serous Cystadenocarcinoma	Ovary	Ovary	female	Ovary Ovarian Serous Cystadenocarcinoma
622aa6df-e8fa-405c-b56b-30a9f44744bb	TCGA	Cancer	Ovarian Serous Cystadenocarcinoma	Ovary	Ovary	female	Ovary Ovarian Serous Cystadenocarcinoma
65f73f3f-4703-41b2-93a8-8c664870183f	TCGA	Cancer	Ovarian Serous Cystadenocarcinoma	Ovary	Ovary	female	Ovary Ovarian Serous Cystadenocarcinoma
053fe63a-cae3-461d-a610-222b4e41cf76	TCGA	Cancer	Ovarian Serous Cystadenocarcinoma	Ovary	Ovary	female	Ovary Ovarian Serous Cystadenocarcinoma
59dde5e6-ccd3-49c8-a69b-72fe1dd641d6	TCGA	Cancer	Ovarian Serous Cystadenocarcinoma	Ovary	Ovary	female	Ovary Ovarian Serous Cystadenocarcinoma
ee651268-ea91-4035-ba36-e96defa81cc0	TCGA	Cancer	Ovarian Serous Cystadenocarcinoma	Ovary	Ovary	female	Ovary Ovarian Serous Cystadenocarcinoma
b28f9df5-e6a6-4874-9c4e-fb60e4be2e8e	TCGA	Cancer	Ovarian Serous Cystadenocarcinoma	Ovary	Ovary	female	Ovary Ovarian Serous Cystadenocarcinoma
d60ab475-5684-4422-a6e2-c559394ea90e	TCGA	Cancer	Ovarian Serous Cystadenocarcinoma	Ovary	Ovary	female	Ovary Ovarian Serous Cystadenocarcinoma
ece8f282-b424-48be-89cb-989077ad6844	TCGA	Cancer	Ovarian Serous Cystadenocarcinoma	Ovary	Ovary	female	Ovary Ovarian Serous Cystadenocarcinoma
0601ea34-3217-493b-86e1-01746844db71	TCGA	Cancer	Ovarian Serous Cystadenocarcinoma	Ovary	Ovary	female	Ovary Ovarian Serous Cystadenocarcinoma
6c0837e4-e920-40a1-876b-847078af9b2c	TCGA	Cancer	Ovarian Serous Cystadenocarcinoma	Ovary	Ovary	female	Ovary Ovarian Serous Cystadenocarcinoma
a3fe5dd4-c762-448e-8b98-1a2fbb600fde	TCGA	Cancer	Ovarian Serous Cystadenocarcinoma	Ovary	Ovary	female	Ovary Ovarian Serous Cystadenocarcinoma
fca18271-972d-4000-80b5-bff527475e44	TCGA	Cancer	Ovarian Serous Cystadenocarcinoma	Ovary	Ovary	female	Ovary Ovarian Serous Cystadenocarcinoma
fc6a155a-6f88-43a2-8bc8-9455aaccf5ad	TCGA	Cancer	Ovarian Serous Cystadenocarcinoma	Ovary	Ovary	female	Ovary Ovarian Serous Cystadenocarcinoma
5581a52f-df5e-44d4-a2a9-05ac03342c7d	TCGA	Cancer	Ovarian Serous Cystadenocarcinoma	Ovary	Ovary	female	Ovary Ovarian Serous Cystadenocarcinoma
fddad662-6df4-44d9-91a4-b99139c8460a	TCGA	Cancer	Ovarian Serous Cystadenocarcinoma	Ovary	Ovary	female	Ovary Ovarian Serous Cystadenocarcinoma
5e4129f4-e8c2-461e-a94f-ebc34cf3c4a5	TCGA	Cancer	Ovarian Serous Cystadenocarcinoma	Ovary	Ovary	female	Ovary Ovarian Serous Cystadenocarcinoma
f8241829-0aba-455d-bdab-9bd1fa60ce38	TCGA	Cancer	Ovarian Serous Cystadenocarcinoma	Ovary	Ovary	female	Ovary Ovarian Serous Cystadenocarcinoma
4d38ff5d-a9f4-48f2-89cc-34bb3608492f	TCGA	Cancer	Ovarian Serous Cystadenocarcinoma	Ovary	Ovary	female	Ovary Ovarian Serous Cystadenocarcinoma
26648bcd-791f-421a-8a21-6bca40fb0bc4	TCGA	Cancer	Pancreatic Adenocarcinoma	Pancreas	Pancreas	female	Pancreas Pancreatic Adenocarcinoma
b47a759a-6149-4315-90e5-a8aae9ed63ba	TCGA	Cancer	Pancreatic Adenocarcinoma	Pancreas	Pancreas	male	Pancreas Pancreatic Adenocarcinoma
8ba923e0-c6e5-4209-a88a-3e2ad208c993	TCGA	Cancer	Pancreatic Adenocarcinoma	Pancreas	Pancreas	male	Pancreas Pancreatic Adenocarcinoma
40fb7463-3e9a-4139-90ce-95a54f0faafc	TCGA	Cancer	Pancreatic Adenocarcinoma	Pancreas	Pancreas	female	Pancreas Pancreatic Adenocarcinoma
92e72010-763a-453a-8f76-a634959cb598	TCGA	Cancer	Pancreatic Adenocarcinoma	Pancreas	Pancreas	female	Pancreas Pancreatic Adenocarcinoma
e1862af0-b2d9-4a77-9cc9-9963cec5f93c	TCGA	Cancer	Pancreatic Adenocarcinoma	Pancreas	Pancreas	female	Pancreas Pancreatic Adenocarcinoma
6bc36507-09c1-4422-bd1c-a38a6c120506	TCGA	Cancer	Pancreatic Adenocarcinoma	Pancreas	Pancreas	female	Pancreas Pancreatic Adenocarcinoma
591094bb-bead-4f1f-be99-c91e989747cc	TCGA	Cancer	Pancreatic Adenocarcinoma	Pancreas	Pancreas	male	Pancreas Pancreatic Adenocarcinoma
a42361c0-3f07-4ed5-a225-422bb02cdeaa	TCGA	Cancer	Pancreatic Adenocarcinoma	Pancreas	Pancreas	male	Pancreas Pancreatic Adenocarcinoma
ebaa478a-d92d-45be-97c0-6890b1f6f2e9	TCGA	Cancer	Pancreatic Adenocarcinoma	Pancreas	Pancreas	female	Pancreas Pancreatic Adenocarcinoma
f69d795f-8fb3-4498-a2f0-77cc559c1fe9	TCGA	Cancer	Pancreatic Adenocarcinoma	Pancreas	Pancreas	male	Pancreas Pancreatic Adenocarcinoma
0b018015-9c9d-4a55-92ca-2d4090e66c8c	TCGA	Cancer	Pancreatic Adenocarcinoma	Pancreas	Pancreas	female	Pancreas Pancreatic Adenocarcinoma
3832f8e8-e016-411b-9602-e10258822f40	TCGA	Cancer	Pancreatic Adenocarcinoma	Pancreas	Pancreas	female	Pancreas Pancreatic Adenocarcinoma
2d79b502-81a7-4c4d-b64e-27510f78e102	TCGA	Cancer	Pancreatic Adenocarcinoma	Pancreas	Pancreas	male	Pancreas Pancreatic Adenocarcinoma
71cb29b7-e163-4fd6-83aa-4cf86e2fad62	TCGA	Cancer	Pancreatic Adenocarcinoma	Pancreas	Pancreas	female	Pancreas Pancreatic Adenocarcinoma
634dde08-b8f0-4519-944d-2997d5ee1ff3	TCGA	Cancer	Pancreatic Adenocarcinoma	Pancreas	Pancreas	male	Pancreas Pancreatic Adenocarcinoma
24c7ac0a-1fcd-4607-b54c-b8e1e34087de	TCGA	Cancer	Pancreatic Adenocarcinoma	Pancreas	Pancreas	female	Pancreas Pancreatic Adenocarcinoma
e2b124ea-ebb6-425e-be32-ae31a480514b	TCGA	Cancer	Pancreatic Adenocarcinoma	Pancreas	Pancreas	male	Pancreas Pancreatic Adenocarcinoma
d10afb5c-41ef-4b2a-9029-7b931c02d742	TCGA	Cancer	Pancreatic Adenocarcinoma	Pancreas	Pancreas	male	Pancreas Pancreatic Adenocarcinoma
950ccc92-d5b6-4327-b8c6-77449c1e986c	TCGA	Cancer	Pancreatic Adenocarcinoma	Pancreas	Pancreas	female	Pancreas Pancreatic Adenocarcinoma
ef5e5f4c-33a1-4dfc-badd-2dda9874d75b	TCGA	Cancer	Pancreatic Adenocarcinoma	Pancreas	Pancreas	male	Pancreas Pancreatic Adenocarcinoma
9860f40f-72dd-4e6f-bbc4-0697eed66146	TCGA	Cancer	Pancreatic Adenocarcinoma	Pancreas	Pancreas	male	Pancreas Pancreatic Adenocarcinoma
9182acae-5300-463a-9980-2745a54b61a6	TCGA	Cancer	Pancreatic Adenocarcinoma	Pancreas	Pancreas	female	Pancreas Pancreatic Adenocarcinoma
61b89d67-7a81-47dc-a4b8-bf172dfc8529	TCGA	Cancer	Pancreatic Adenocarcinoma	Pancreas	Pancreas	male	Pancreas Pancreatic Adenocarcinoma
1bff1f0c-a4e0-4cb7-9e87-ea3ae24d83c6	TCGA	Cancer	Mesothelioma	Pleura	Pleura	female	Pleura Mesothelioma
919b5ce1-d7c5-4d45-a48e-9a1a79e78bc6	TCGA	Cancer	Mesothelioma	Pleura	Pleura	male	Pleura Mesothelioma
8a8a8b43-abd4-4660-a1d4-d0ca6479abc4	TCGA	Cancer	Mesothelioma	Pleura	Pleura	male	Pleura Mesothelioma
d8784496-dd86-4071-a591-8f276032d1f1	TCGA	Cancer	Mesothelioma	Pleura	Pleura	male	Pleura Mesothelioma
c1f482e3-0b5a-4eb7-afa5-448d11d7600d	TCGA	Cancer	Mesothelioma	Pleura	Pleura	female	Pleura Mesothelioma
3a882cac-26a9-4e55-b09e-881cfdb2fd6a	TCGA	Cancer	Mesothelioma	Pleura	Pleura	female	Pleura Mesothelioma
8963f635-5f65-429b-86ed-2650084a4244	TCGA	Cancer	Mesothelioma	Pleura	Pleura	female	Pleura Mesothelioma
beee85bd-facc-4783-8f3d-ab82b816ff70	TCGA	Cancer	Mesothelioma	Pleura	Pleura	male	Pleura Mesothelioma
3ef342df-d44c-4649-ab55-112bd60b2e87	TCGA	Cancer	Mesothelioma	Pleura	Pleura	male	Pleura Mesothelioma
004ba8a7-bd46-46b7-8e46-de1bc3396477	TCGA	Cancer	Mesothelioma	Pleura	Pleura	male	Pleura Mesothelioma
a203b18f-08e4-4351-b6c5-fdac4966e4d4	TCGA	Cancer	Mesothelioma	Pleura	Pleura	female	Pleura Mesothelioma
42b23ffc-8958-4951-a463-d6154a7f109c	TCGA	Cancer	Mesothelioma	Pleura	Pleura	male	Pleura Mesothelioma
1b840f4c-9609-44a1-a472-9ee9ff65be15	TCGA	Cancer	Mesothelioma	Pleura	Pleura	female	Pleura Mesothelioma
7fe8cbc9-356e-4020-a16f-bb2a9f5ab710	TCGA	Cancer	Mesothelioma	Pleura	Pleura	male	Pleura Mesothelioma
79f94c1b-8ee0-41c8-9ed0-96d95d9faee4	TCGA	Cancer	Mesothelioma	Pleura	Pleura	female	Pleura Mesothelioma
2c090384-01d0-4d1d-9747-a0ec9a7cde39	TCGA	Cancer	Mesothelioma	Pleura	Pleura	female	Pleura Mesothelioma
9d8666c3-e4fb-4c63-85cc-0973b63349ed	TCGA	Cancer	Mesothelioma	Pleura	Pleura	male	Pleura Mesothelioma
c5196bb8-6fb7-41e2-8e04-ddccbc75a3ea	TCGA	Cancer	Mesothelioma	Pleura	Pleura	female	Pleura Mesothelioma
36556e13-e4a6-4462-82e7-bb7467356526	TCGA	Cancer	Mesothelioma	Pleura	Pleura	female	Pleura Mesothelioma
4dd86651-2563-463e-9b80-220a6a4a6e58	TCGA	Cancer	Mesothelioma	Pleura	Pleura	male	Pleura Mesothelioma
151dddcb-5070-482b-a1b4-fe8898291e38	TCGA	Cancer	Mesothelioma	Pleura	Pleura	female	Pleura Mesothelioma
85f669c7-784a-4617-9ba1-515a1f5a841c	TCGA	Cancer	Mesothelioma	Pleura	Pleura	male	Pleura Mesothelioma
8dbad146-caa6-4b78-b1a2-492ccdc3518a	TCGA	Cancer	Mesothelioma	Pleura	Pleura	female	Pleura Mesothelioma
55cbddc9-3ed2-407d-b5e9-44d77e715357	TCGA	Cancer	Mesothelioma	Pleura	Pleura	male	Pleura Mesothelioma
597eefd0-f997-4cb5-a876-2a45b13f6e7c	TCGA	Cancer	Prostate Adenocarcinoma	Prostate	Prostate	male	Prostate Prostate Adenocarcinoma
2463d2b6-af4e-46e0-81e4-4bbb13f2f083	TCGA	Cancer	Prostate Adenocarcinoma	Prostate	Prostate	male	Prostate Prostate Adenocarcinoma
94983358-b7cf-4c53-901c-d29f2fac3d6d	TCGA	Cancer	Prostate Adenocarcinoma	Prostate	Prostate	male	Prostate Prostate Adenocarcinoma
48f14ee6-2fe8-49ce-8bdb-8c00d75816b9	TCGA	Cancer	Prostate Adenocarcinoma	Prostate	Prostate	male	Prostate Prostate Adenocarcinoma
36516837-d34b-44f0-9874-c0d6911ef891	TCGA	Cancer	Prostate Adenocarcinoma	Prostate	Prostate	male	Prostate Prostate Adenocarcinoma
f79b5067-9ed6-429b-a68a-f0d5c3a3326f	TCGA	Cancer	Prostate Adenocarcinoma	Prostate	Prostate	male	Prostate Prostate Adenocarcinoma
d5761094-167c-4371-87fb-11b3f55fda9a	TCGA	Cancer	Prostate Adenocarcinoma	Prostate	Prostate	male	Prostate Prostate Adenocarcinoma
55b58cf5-bf5a-40c0-9969-c59c452fdaf4	TCGA	Cancer	Prostate Adenocarcinoma	Prostate	Prostate	male	Prostate Prostate Adenocarcinoma
d4fe7ec4-e7a8-4861-8b3e-b99d70144f1c	TCGA	Cancer	Prostate Adenocarcinoma	Prostate	Prostate	male	Prostate Prostate Adenocarcinoma
11fe9b20-ad0b-4a90-8400-aa1c648e868f	TCGA	Cancer	Prostate Adenocarcinoma	Prostate	Prostate	male	Prostate Prostate Adenocarcinoma
2d6f7a5c-ff83-45ab-8515-57a33c4c9d5a	TCGA	Cancer	Prostate Adenocarcinoma	Prostate	Prostate	male	Prostate Prostate Adenocarcinoma
511464a5-0a10-4c1c-968e-ae566159521d	TCGA	Cancer	Prostate Adenocarcinoma	Prostate	Prostate	male	Prostate Prostate Adenocarcinoma
d1348393-cb7f-4db7-ae3a-3d17e08bc75c	TCGA	Cancer	Prostate Adenocarcinoma	Prostate	Prostate	male	Prostate Prostate Adenocarcinoma
5fdd7878-315c-4211-863d-50b4e791ba33	TCGA	Cancer	Prostate Adenocarcinoma	Prostate	Prostate	male	Prostate Prostate Adenocarcinoma
b16d9a52-1734-4173-95d1-4f4fe7e10db1	TCGA	Cancer	Prostate Adenocarcinoma	Prostate	Prostate	male	Prostate Prostate Adenocarcinoma
0fb19ab3-73c1-4913-9c8c-fd8570ff1ba7	TCGA	Cancer	Prostate Adenocarcinoma	Prostate	Prostate	male	Prostate Prostate Adenocarcinoma
62ab80cf-9556-45fa-8471-3c473ea73586	TCGA	Cancer	Prostate Adenocarcinoma	Prostate	Prostate	male	Prostate Prostate Adenocarcinoma
352f8b20-ce74-4f4f-b5ca-953933355006	TCGA	Cancer	Prostate Adenocarcinoma	Prostate	Prostate	male	Prostate Prostate Adenocarcinoma
53c4b96a-01f6-48e4-80e0-59dcae4fdcd6	TCGA	Cancer	Prostate Adenocarcinoma	Prostate	Prostate	male	Prostate Prostate Adenocarcinoma
bccb7a3e-27a0-4fd2-90ac-86943a3fc456	TCGA	Cancer	Prostate Adenocarcinoma	Prostate	Prostate	male	Prostate Prostate Adenocarcinoma
e21921f4-70d0-4427-ab67-699d4e071484	TCGA	Cancer	Prostate Adenocarcinoma	Prostate	Prostate	male	Prostate Prostate Adenocarcinoma
94e080b8-b373-4a9d-bdc1-70fd42e1c73b	TCGA	Cancer	Prostate Adenocarcinoma	Prostate	Prostate	male	Prostate Prostate Adenocarcinoma
57f2b298-9d6c-421f-b0f6-f486e43d626b	TCGA	Cancer	Prostate Adenocarcinoma	Prostate	Prostate	male	Prostate Prostate Adenocarcinoma
4cd5985c-0aa4-446c-b733-768c61c1265c	TCGA	Cancer	Prostate Adenocarcinoma	Prostate	Prostate	male	Prostate Prostate Adenocarcinoma
517b7d48-b56f-4669-9ac9-a2ebd38f62c0	TCGA	Cancer	Skin Cutaneous Melanoma	Skin	Skin	male	Skin Skin Cutaneous Melanoma
4bcb9553-89a1-43b8-87ed-c734bcaccb42	TCGA	Cancer	Skin Cutaneous Melanoma	Skin	Skin	female	Skin Skin Cutaneous Melanoma
bc4c6105-32f8-42ce-bf2a-fe51cad16d39	TCGA	Cancer	Skin Cutaneous Melanoma	Skin	Skin	female	Skin Skin Cutaneous Melanoma
8a029484-0321-4f80-a941-37bbb91d41e6	TCGA	Cancer	Skin Cutaneous Melanoma	Skin	Skin	female	Skin Skin Cutaneous Melanoma
07bea59f-c505-4b38-a096-e16b3109d2ac	TCGA	Cancer	Skin Cutaneous Melanoma	Skin	Skin	female	Skin Skin Cutaneous Melanoma
ac9597b0-5532-42db-bdd7-602467253c7a	TCGA	Cancer	Skin Cutaneous Melanoma	Skin	Skin	male	Skin Skin Cutaneous Melanoma
c939afec-3899-427b-91aa-badb6843abe6	TCGA	Cancer	Skin Cutaneous Melanoma	Skin	Skin	male	Skin Skin Cutaneous Melanoma
22bf1ad3-8fdd-440c-940f-5d2057d76fb8	TCGA	Cancer	Skin Cutaneous Melanoma	Skin	Skin	female	Skin Skin Cutaneous Melanoma
8a6350bf-5b10-420a-a2a5-58f2ab22a29a	TCGA	Cancer	Skin Cutaneous Melanoma	Skin	Skin	female	Skin Skin Cutaneous Melanoma
7920714a-df23-46df-936c-31036c4c4779	TCGA	Cancer	Skin Cutaneous Melanoma	Skin	Skin	male	Skin Skin Cutaneous Melanoma
8ca1ceb0-da28-43de-b1df-afadf5360109	TCGA	Cancer	Skin Cutaneous Melanoma	Skin	Skin	female	Skin Skin Cutaneous Melanoma
c0cea8dd-ec09-4a7a-903a-5cb5b90251e9	TCGA	Cancer	Skin Cutaneous Melanoma	Skin	Skin	male	Skin Skin Cutaneous Melanoma
daf59398-6beb-41d2-aad4-1b61e81bbb18	TCGA	Cancer	Skin Cutaneous Melanoma	Skin	Skin	male	Skin Skin Cutaneous Melanoma
b9edac55-24d3-475f-ac6b-68031151b91e	TCGA	Cancer	Skin Cutaneous Melanoma	Skin	Skin	female	Skin Skin Cutaneous Melanoma
af77b149-a33d-4d43-a12a-85d3faf97f18	TCGA	Cancer	Skin Cutaneous Melanoma	Skin	Skin	male	Skin Skin Cutaneous Melanoma
a50cdac5-77de-4120-bf4e-fa45415e389d	TCGA	Cancer	Skin Cutaneous Melanoma	Skin	Skin	male	Skin Skin Cutaneous Melanoma
dc0534f8-00cc-43ad-a313-05931d3c7682	TCGA	Cancer	Skin Cutaneous Melanoma	Skin	Skin	male	Skin Skin Cutaneous Melanoma
e63618cf-3da7-4579-936f-809275e194da	TCGA	Cancer	Skin Cutaneous Melanoma	Skin	Skin	female	Skin Skin Cutaneous Melanoma
c672b2ca-49b3-457c-98d1-275490ec45c7	TCGA	Cancer	Skin Cutaneous Melanoma	Skin	Skin	male	Skin Skin Cutaneous Melanoma
a9ec85e3-5167-4718-a363-e72164c5dc62	TCGA	Cancer	Skin Cutaneous Melanoma	Skin	Skin	male	Skin Skin Cutaneous Melanoma
f3d190b8-2c42-4817-9302-b89de91fe57b	TCGA	Cancer	Skin Cutaneous Melanoma	Skin	Skin	female	Skin Skin Cutaneous Melanoma
cc5d5afd-8944-41e3-a6a3-26d448fcbb98	TCGA	Cancer	Skin Cutaneous Melanoma	Skin	Skin	female	Skin Skin Cutaneous Melanoma
877c9d12-b6f9-4072-8a5e-84bd9fe6b7a3	TCGA	Cancer	Skin Cutaneous Melanoma	Skin	Skin	male	Skin Skin Cutaneous Melanoma
2968a0ca-b550-40e7-8da5-cf771936f77a	TCGA	Cancer	Skin Cutaneous Melanoma	Skin	Skin	female	Skin Skin Cutaneous Melanoma
e08379c0-63ec-4e1c-ada0-9c2df089035b	TCGA	Cancer	Sarcoma	Soft Tissue	Soft Tissue	female	Soft Tissue Sarcoma
5418d1dc-5670-4145-88e8-d80f0096a755	TCGA	Cancer	Sarcoma	Soft Tissue	Soft Tissue	male	Soft Tissue Sarcoma
5818b7fc-9e40-465d-927e-a3029274ad72	TCGA	Cancer	Sarcoma	Soft Tissue	Soft Tissue	female	Soft Tissue Sarcoma
20d46665-bc9c-4f42-99ff-577839494ab8	TCGA	Cancer	Sarcoma	Soft Tissue	Soft Tissue	male	Soft Tissue Sarcoma
0892bb47-ffea-4781-96a8-ca0ec0e47de3	TCGA	Cancer	Sarcoma	Soft Tissue	Soft Tissue	female	Soft Tissue Sarcoma
c8e7c79b-8439-4a61-9c14-ef4a4f77bfe7	TCGA	Cancer	Sarcoma	Soft Tissue	Soft Tissue	female	Soft Tissue Sarcoma
35e484c2-4028-44ba-a5c8-0a371c60ef86	TCGA	Cancer	Sarcoma	Soft Tissue	Soft Tissue	male	Soft Tissue Sarcoma
6b61e80e-b51a-4552-b019-18acee879a3d	TCGA	Cancer	Sarcoma	Soft Tissue	Soft Tissue	female	Soft Tissue Sarcoma
bfaa5944-e1cb-41e4-9dab-2faa84fc3896	TCGA	Cancer	Sarcoma	Soft Tissue	Soft Tissue	male	Soft Tissue Sarcoma
eba887e9-1dfb-489d-8a4b-90967fde8699	TCGA	Cancer	Sarcoma	Soft Tissue	Soft Tissue	female	Soft Tissue Sarcoma
7d99fbd0-9ef3-4d33-8e9f-02620e1801c7	TCGA	Cancer	Sarcoma	Soft Tissue	Soft Tissue	male	Soft Tissue Sarcoma
7d2af6c3-c121-462c-84cd-93bc6e94adfd	TCGA	Cancer	Sarcoma	Soft Tissue	Soft Tissue	male	Soft Tissue Sarcoma
9762a0a6-f30d-42ef-b8a9-d8593b03102e	TCGA	Cancer	Sarcoma	Soft Tissue	Soft Tissue	male	Soft Tissue Sarcoma
7c3b8bf6-a1d6-49f6-b050-3f96f33b59d7	TCGA	Cancer	Sarcoma	Soft Tissue	Soft Tissue	male	Soft Tissue Sarcoma
a03264d3-1a01-4c8a-87af-942249213ec5	TCGA	Cancer	Sarcoma	Soft Tissue	Soft Tissue	female	Soft Tissue Sarcoma
f6dfe419-a543-495a-b660-2486b720cc89	TCGA	Cancer	Sarcoma	Soft Tissue	Soft Tissue	male	Soft Tissue Sarcoma
923855ef-dc57-434b-979f-109dfcbb3dbf	TCGA	Cancer	Sarcoma	Soft Tissue	Soft Tissue	male	Soft Tissue Sarcoma
46b247c1-21fa-484b-b487-281e79fdfc93	TCGA	Cancer	Sarcoma	Soft Tissue	Soft Tissue	female	Soft Tissue Sarcoma
859bbf6f-a492-4bf7-b09a-732514c56f5b	TCGA	Cancer	Sarcoma	Soft Tissue	Soft Tissue	female	Soft Tissue Sarcoma
d3e36dba-39e0-48e5-a23f-59dd2b16ba7c	TCGA	Cancer	Sarcoma	Soft Tissue	Soft Tissue	male	Soft Tissue Sarcoma
06e2c5f5-7826-4ea0-a0f5-35c582594981	TCGA	Cancer	Sarcoma	Soft Tissue	Soft Tissue	female	Soft Tissue Sarcoma
5a37788c-a590-44ef-acab-c378f170f48a	TCGA	Cancer	Sarcoma	Soft Tissue	Soft Tissue	male	Soft Tissue Sarcoma
35a794ad-5be9-4795-8c62-fe8a11fb5707	TCGA	Cancer	Sarcoma	Soft Tissue	Soft Tissue	female	Soft Tissue Sarcoma
73d95599-4408-4cae-80f6-f731af323649	TCGA	Cancer	Sarcoma	Soft Tissue	Soft Tissue	female	Soft Tissue Sarcoma
99c751f5-1a3c-4f69-a4c6-b64afa59608b	TCGA	Cancer	Stomach Adenocarcinoma	Stomach	Stomach	female	Stomach Stomach Adenocarcinoma
d7182b8b-1c35-414d-98c3-2ab62e478da2	TCGA	Cancer	Stomach Adenocarcinoma	Stomach	Stomach	male	Stomach Stomach Adenocarcinoma
f7a97dca-6f5d-421a-b073-7752552918f8	TCGA	Cancer	Stomach Adenocarcinoma	Stomach	Stomach	male	Stomach Stomach Adenocarcinoma
15c472e8-dc05-4641-875e-4423ac3aebd9	TCGA	Cancer	Stomach Adenocarcinoma	Stomach	Stomach	female	Stomach Stomach Adenocarcinoma
de1f12f2-ddde-415c-af44-e56a34e8c70a	TCGA	Cancer	Stomach Adenocarcinoma	Stomach	Stomach	male	Stomach Stomach Adenocarcinoma
47383ff9-3389-4748-999c-66fc5a8c91c6	TCGA	Cancer	Stomach Adenocarcinoma	Stomach	Stomach	male	Stomach Stomach Adenocarcinoma
8b7fa25b-a830-401b-9ad9-f81b331b93e3	TCGA	Cancer	Stomach Adenocarcinoma	Stomach	Stomach	female	Stomach Stomach Adenocarcinoma
5faa4a3d-7cc5-4595-99b8-5eb3bf58d9d4	TCGA	Cancer	Stomach Adenocarcinoma	Stomach	Stomach	male	Stomach Stomach Adenocarcinoma
a567d703-8f62-4196-aa8c-02fd5c67c0e2	TCGA	Cancer	Stomach Adenocarcinoma	Stomach	Stomach	female	Stomach Stomach Adenocarcinoma
5ceeb9a7-d6bf-470a-9bf9-f43cd6dc969a	TCGA	Cancer	Stomach Adenocarcinoma	Stomach	Stomach	male	Stomach Stomach Adenocarcinoma
81413076-f338-4755-9069-5fba54f7be34	TCGA	Cancer	Stomach Adenocarcinoma	Stomach	Stomach	male	Stomach Stomach Adenocarcinoma
cd8e881f-2293-4853-b9bc-d8185b466653	TCGA	Cancer	Stomach Adenocarcinoma	Stomach	Stomach	female	Stomach Stomach Adenocarcinoma
be76e4de-1d22-4dae-ad8f-b14748104c58	TCGA	Cancer	Stomach Adenocarcinoma	Stomach	Stomach	male	Stomach Stomach Adenocarcinoma
b3b169f7-56ec-4011-a1c2-056ec129afae	TCGA	Cancer	Stomach Adenocarcinoma	Stomach	Stomach	female	Stomach Stomach Adenocarcinoma
592deef8-4e7a-4664-b9dc-f894e3d79d90	TCGA	Cancer	Stomach Adenocarcinoma	Stomach	Stomach	female	Stomach Stomach Adenocarcinoma
843cd8a0-3838-4cf2-90c5-84e6dd3e67d2	TCGA	Cancer	Stomach Adenocarcinoma	Stomach	Stomach	female	Stomach Stomach Adenocarcinoma
2a19bb88-984a-4166-ae8c-07d40cee7867	TCGA	Cancer	Stomach Adenocarcinoma	Stomach	Stomach	male	Stomach Stomach Adenocarcinoma
932374bf-4efb-4233-994f-548aa4e61a24	TCGA	Cancer	Stomach Adenocarcinoma	Stomach	Stomach	female	Stomach Stomach Adenocarcinoma
3987324a-36cb-4d53-a45c-d6ce3bdd5c7d	TCGA	Cancer	Stomach Adenocarcinoma	Stomach	Stomach	male	Stomach Stomach Adenocarcinoma
04cb8c69-b41b-4dd1-90b8-7b6f74fc8ef7	TCGA	Cancer	Stomach Adenocarcinoma	Stomach	Stomach	female	Stomach Stomach Adenocarcinoma
664bde83-81b9-4daa-9510-d6098d02fe24	TCGA	Cancer	Stomach Adenocarcinoma	Stomach	Stomach	male	Stomach Stomach Adenocarcinoma
bb468162-f657-4f73-997f-dcfeda8c96b7	TCGA	Cancer	Stomach Adenocarcinoma	Stomach	Stomach	female	Stomach Stomach Adenocarcinoma
f08808e6-39c9-4f61-9484-997ac54e6b99	TCGA	Cancer	Stomach Adenocarcinoma	Stomach	Stomach	female	Stomach Stomach Adenocarcinoma
c8bcb222-1efb-437f-84ff-fb19dc03fca3	TCGA	Cancer	Stomach Adenocarcinoma	Stomach	Stomach	male	Stomach Stomach Adenocarcinoma
fc1fd20f-44fe-44a2-928d-ab5cdb1a8465	TCGA	Cancer	Testicular Germ Cell Tumors	Testis	Testis	male	Testis Testicular Germ Cell Tumors
44f6ad8a-4e0b-4f84-84a6-58a55fd40264	TCGA	Cancer	Testicular Germ Cell Tumors	Testis	Testis	male	Testis Testicular Germ Cell Tumors
9368629a-0738-4675-a055-955c3ddd9e64	TCGA	Cancer	Testicular Germ Cell Tumors	Testis	Testis	male	Testis Testicular Germ Cell Tumors
98f99c45-19de-47fc-894d-e625d510b51b	TCGA	Cancer	Testicular Germ Cell Tumors	Testis	Testis	male	Testis Testicular Germ Cell Tumors
c3f19cf6-3503-4cf0-9de9-47ffe8b334d7	TCGA	Cancer	Testicular Germ Cell Tumors	Testis	Testis	male	Testis Testicular Germ Cell Tumors
6271f7b2-acc1-4979-90d5-b704e3bef28d	TCGA	Cancer	Testicular Germ Cell Tumors	Testis	Testis	male	Testis Testicular Germ Cell Tumors
97ec18b1-048b-4da4-a51e-afedd7af37b2	TCGA	Cancer	Testicular Germ Cell Tumors	Testis	Testis	male	Testis Testicular Germ Cell Tumors
78dac9ee-c140-48ab-bf03-ac69e960314b	TCGA	Cancer	Testicular Germ Cell Tumors	Testis	Testis	male	Testis Testicular Germ Cell Tumors
ccc77643-a78b-492a-93f3-46a0e6870406	TCGA	Cancer	Testicular Germ Cell Tumors	Testis	Testis	male	Testis Testicular Germ Cell Tumors
c73c7f36-71a9-49ca-b240-730a3f396fa4	TCGA	Cancer	Testicular Germ Cell Tumors	Testis	Testis	male	Testis Testicular Germ Cell Tumors
92205a5e-4818-4520-8974-9b543a076eff	TCGA	Cancer	Testicular Germ Cell Tumors	Testis	Testis	male	Testis Testicular Germ Cell Tumors
de4512ba-075c-4916-9162-acb22a261c42	TCGA	Cancer	Testicular Germ Cell Tumors	Testis	Testis	male	Testis Testicular Germ Cell Tumors
f648e318-6a1e-4bf1-a642-3f82b360dc0f	TCGA	Cancer	Testicular Germ Cell Tumors	Testis	Testis	male	Testis Testicular Germ Cell Tumors
86b88a4c-ba41-47e5-9d81-dbfb8e4a5e8d	TCGA	Cancer	Testicular Germ Cell Tumors	Testis	Testis	male	Testis Testicular Germ Cell Tumors
b256b51f-4660-4176-81fe-7bc266a46640	TCGA	Cancer	Testicular Germ Cell Tumors	Testis	Testis	male	Testis Testicular Germ Cell Tumors
65b72d96-b66f-4a8b-8e77-9a21e5e2b57f	TCGA	Cancer	Testicular Germ Cell Tumors	Testis	Testis	male	Testis Testicular Germ Cell Tumors
1bc15944-72ca-418f-a097-6d2ad4718298	TCGA	Cancer	Testicular Germ Cell Tumors	Testis	Testis	male	Testis Testicular Germ Cell Tumors
03e3780e-caa3-43f3-9f25-39f3398876e5	TCGA	Cancer	Testicular Germ Cell Tumors	Testis	Testis	male	Testis Testicular Germ Cell Tumors
f0c45059-d823-45cd-8413-51c345d2774a	TCGA	Cancer	Testicular Germ Cell Tumors	Testis	Testis	male	Testis Testicular Germ Cell Tumors
a39790e4-d01f-4076-b637-cdb166ac97cb	TCGA	Cancer	Testicular Germ Cell Tumors	Testis	Testis	male	Testis Testicular Germ Cell Tumors
eb3c682e-fb77-4601-9be8-7f56fc4b9521	TCGA	Cancer	Testicular Germ Cell Tumors	Testis	Testis	male	Testis Testicular Germ Cell Tumors
b11eb4e4-2d74-4821-82d6-0652d0ee85f6	TCGA	Cancer	Testicular Germ Cell Tumors	Testis	Testis	male	Testis Testicular Germ Cell Tumors
de068d67-0ea7-4a44-9d6d-c6659ab95375	TCGA	Cancer	Testicular Germ Cell Tumors	Testis	Testis	male	Testis Testicular Germ Cell Tumors
2eee40cb-88fa-4950-98a1-5960662c8525	TCGA	Cancer	Testicular Germ Cell Tumors	Testis	Testis	male	Testis Testicular Germ Cell Tumors
f92bf3c3-3d34-4b42-bd20-03c13f3d42ea	TCGA	Cancer	Thymoma	Thymus	Thymus	male	Thymus Thymoma
5845fe97-971f-4df8-bb72-7f932927af95	TCGA	Cancer	Thymoma	Thymus	Thymus	male	Thymus Thymoma
49012b3a-34be-40a2-b124-42ab170449c2	TCGA	Cancer	Thymoma	Thymus	Thymus	male	Thymus Thymoma
2d320f7f-69ce-48f0-b36b-84d72474898a	TCGA	Cancer	Thymoma	Thymus	Thymus	female	Thymus Thymoma
6fabdaa5-fbe8-4dd5-a34f-adb174a2fbbc	TCGA	Cancer	Thymoma	Thymus	Thymus	male	Thymus Thymoma
e01df28b-a6bf-4888-8a86-f8f4bcaad278	TCGA	Cancer	Thymoma	Thymus	Thymus	male	Thymus Thymoma
8051d910-559e-44f2-b55c-c6df9de8989d	TCGA	Cancer	Thymoma	Thymus	Thymus	female	Thymus Thymoma
daddefdd-19ce-40f7-8dcc-6a61b9610134	TCGA	Cancer	Thymoma	Thymus	Thymus	male	Thymus Thymoma
bcca0ee8-eb01-4f8d-8809-bb8e074fc310	TCGA	Cancer	Thymoma	Thymus	Thymus	female	Thymus Thymoma
ee913025-31ef-440d-a480-5a78e2508d35	TCGA	Cancer	Thymoma	Thymus	Thymus	male	Thymus Thymoma
aafbdae7-eb6c-4707-b7c4-854f6b000f1c	TCGA	Cancer	Thymoma	Thymus	Thymus	female	Thymus Thymoma
81f5fe45-a52e-4020-b05e-1ea3f43728b8	TCGA	Cancer	Thymoma	Thymus	Thymus	male	Thymus Thymoma
0e477832-3473-4af0-85ca-c5ec90902201	TCGA	Cancer	Thymoma	Thymus	Thymus	female	Thymus Thymoma
be9ee3d0-e5b9-4d78-b5f9-031aef42b1bf	TCGA	Cancer	Thymoma	Thymus	Thymus	female	Thymus Thymoma
06e1438a-b7f5-47fb-bc70-131ac60e7381	TCGA	Cancer	Thymoma	Thymus	Thymus	female	Thymus Thymoma
fceed3dd-2b40-44ca-bcd5-c9f15757413d	TCGA	Cancer	Thymoma	Thymus	Thymus	male	Thymus Thymoma
509d24e3-65e2-4b63-9b42-b4b7f9b241eb	TCGA	Cancer	Thymoma	Thymus	Thymus	female	Thymus Thymoma
00c48efd-3131-4c21-b8b2-2f914a9cfa71	TCGA	Cancer	Thymoma	Thymus	Thymus	male	Thymus Thymoma
b7edae8a-8185-45c2-b0c5-f7d8fe8520c8	TCGA	Cancer	Thymoma	Thymus	Thymus	female	Thymus Thymoma
c5370a4b-0f8b-4085-8989-dbf708b5990d	TCGA	Cancer	Thymoma	Thymus	Thymus	female	Thymus Thymoma
2dc6e174-a6b2-4d57-919f-6bd218e1c0cf	TCGA	Cancer	Thymoma	Thymus	Thymus	female	Thymus Thymoma
99c11301-6a16-412a-baec-a27a9da2ecc0	TCGA	Cancer	Thymoma	Thymus	Thymus	male	Thymus Thymoma
0eedd690-9ce0-46d3-bb0b-2a7d26024aad	TCGA	Cancer	Thymoma	Thymus	Thymus	male	Thymus Thymoma
dc04a2b8-b9b3-46f9-a944-9a820f39d4ae	TCGA	Cancer	Thymoma	Thymus	Thymus	female	Thymus Thymoma
304930a9-1722-4768-b270-a0de20339fb9	TCGA	Cancer	Thyroid Carcinoma	Thyroid	Thyroid	male	Thyroid Thyroid Carcinoma
897d450f-a91e-4aa0-8a48-746044cb69ad	TCGA	Cancer	Thyroid Carcinoma	Thyroid	Thyroid	male	Thyroid Thyroid Carcinoma
748816fa-9039-4815-9b5f-b3f924a3c8cc	TCGA	Cancer	Thyroid Carcinoma	Thyroid	Thyroid	female	Thyroid Thyroid Carcinoma
5d688768-49ef-4058-9601-f29643d55770	TCGA	Cancer	Thyroid Carcinoma	Thyroid	Thyroid	female	Thyroid Thyroid Carcinoma
0b65bfd2-1d66-4843-b45d-22e9d3cd752f	TCGA	Cancer	Thyroid Carcinoma	Thyroid	Thyroid	female	Thyroid Thyroid Carcinoma
7cc8e1f6-de50-406a-a73a-66f16f0a2d8c	TCGA	Cancer	Thyroid Carcinoma	Thyroid	Thyroid	female	Thyroid Thyroid Carcinoma
63659984-4b73-4d15-9d14-f3504a92840c	TCGA	Cancer	Thyroid Carcinoma	Thyroid	Thyroid	male	Thyroid Thyroid Carcinoma
34875d1e-90fe-4a4f-bde2-f23fdb543640	TCGA	Cancer	Thyroid Carcinoma	Thyroid	Thyroid	male	Thyroid Thyroid Carcinoma
53a85137-3601-4d29-8260-be18e12eeb1c	TCGA	Cancer	Thyroid Carcinoma	Thyroid	Thyroid	male	Thyroid Thyroid Carcinoma
3ac8acd9-c9f5-41d9-a9dd-59679af7bbe3	TCGA	Cancer	Thyroid Carcinoma	Thyroid	Thyroid	female	Thyroid Thyroid Carcinoma
190cbfa4-cacd-4514-a75c-528861dc627a	TCGA	Cancer	Thyroid Carcinoma	Thyroid	Thyroid	male	Thyroid Thyroid Carcinoma
fe914956-686a-4312-9fc3-5de5e52a5b6b	TCGA	Cancer	Thyroid Carcinoma	Thyroid	Thyroid	male	Thyroid Thyroid Carcinoma
39b1476f-eba2-47d1-b02e-a4020e30d36b	TCGA	Cancer	Thyroid Carcinoma	Thyroid	Thyroid	female	Thyroid Thyroid Carcinoma
ba975382-fd29-472d-9579-f165f058958f	TCGA	Cancer	Thyroid Carcinoma	Thyroid	Thyroid	female	Thyroid Thyroid Carcinoma
71335daa-29aa-4457-acf2-fbf30cab782a	TCGA	Cancer	Thyroid Carcinoma	Thyroid	Thyroid	male	Thyroid Thyroid Carcinoma
11628538-0f96-4898-a2c5-dd09f352cdcd	TCGA	Cancer	Thyroid Carcinoma	Thyroid	Thyroid	female	Thyroid Thyroid Carcinoma
717a37a4-9a1e-48a0-8ee8-2c09101d31b6	TCGA	Cancer	Thyroid Carcinoma	Thyroid	Thyroid	female	Thyroid Thyroid Carcinoma
43f57d90-9d9d-406d-b2af-ab4cb14dcd68	TCGA	Cancer	Thyroid Carcinoma	Thyroid	Thyroid	female	Thyroid Thyroid Carcinoma
6deb812e-43d2-4fbd-900c-8c46497a39e3	TCGA	Cancer	Thyroid Carcinoma	Thyroid	Thyroid	female	Thyroid Thyroid Carcinoma
f8162566-19cd-4f78-a624-0248712c3775	TCGA	Cancer	Thyroid Carcinoma	Thyroid	Thyroid	male	Thyroid Thyroid Carcinoma
00de478e-0d1c-4aa4-8dcd-193944306227	TCGA	Cancer	Thyroid Carcinoma	Thyroid	Thyroid	male	Thyroid Thyroid Carcinoma
e2cd42aa-e9da-4b0c-b994-16fd239ccd60	TCGA	Cancer	Thyroid Carcinoma	Thyroid	Thyroid	male	Thyroid Thyroid Carcinoma
a91d9b3a-69cc-45d0-843f-a62325b8f959	TCGA	Cancer	Thyroid Carcinoma	Thyroid	Thyroid	male	Thyroid Thyroid Carcinoma
d209ecf5-9e64-4002-8a10-1d7a144cad89	TCGA	Cancer	Thyroid Carcinoma	Thyroid	Thyroid	female	Thyroid Thyroid Carcinoma
4750e2f3-ff15-4bb3-a0a6-c7aa6ef15fb7	TCGA	Cancer	Uterine Carcinosarcoma	Uterus	Uterus	female	Uterus Uterine Carcinosarcoma
1fe2a448-2f97-4b61-93cc-7f24609c95e5	TCGA	Cancer	Uterine Carcinosarcoma	Uterus	Uterus	female	Uterus Uterine Carcinosarcoma
1d9a503e-5bfb-4fae-8c9a-d3a5658a3c2d	TCGA	Cancer	Uterine Carcinosarcoma	Uterus	Uterus	female	Uterus Uterine Carcinosarcoma
288dc474-1187-43d4-8917-c9179840f1bc	TCGA	Cancer	Uterine Carcinosarcoma	Uterus	Uterus	female	Uterus Uterine Carcinosarcoma
da8c25b2-8f3e-4725-9045-0fcc0f529174	TCGA	Cancer	Uterine Carcinosarcoma	Uterus	Uterus	female	Uterus Uterine Carcinosarcoma
0a2b4bd1-18f6-426e-a622-72920766253d	TCGA	Cancer	Uterine Carcinosarcoma	Uterus	Uterus	female	Uterus Uterine Carcinosarcoma
b9a66fc7-e343-4b2a-b59a-ff8407b2bc30	TCGA	Cancer	Uterine Carcinosarcoma	Uterus	Uterus	female	Uterus Uterine Carcinosarcoma
e73ca9b2-60eb-4e9f-bb21-b167c5239a3e	TCGA	Cancer	Uterine Carcinosarcoma	Uterus	Uterus	female	Uterus Uterine Carcinosarcoma
dc2a639b-f96f-4223-83d9-c708b4abb92f	TCGA	Cancer	Uterine Carcinosarcoma	Uterus	Uterus	female	Uterus Uterine Carcinosarcoma
09cda1dc-07f3-49e5-bcf3-dfe12e2b1e39	TCGA	Cancer	Uterine Carcinosarcoma	Uterus	Uterus	female	Uterus Uterine Carcinosarcoma
d89ec098-eba2-4ba5-9bea-9ee73a3eb972	TCGA	Cancer	Uterine Carcinosarcoma	Uterus	Uterus	female	Uterus Uterine Carcinosarcoma
a61a8b9a-d9cf-46d6-ad60-11d42d51e10a	TCGA	Cancer	Uterine Carcinosarcoma	Uterus	Uterus	female	Uterus Uterine Carcinosarcoma
590affbb-453e-4f2e-8ef6-d4802e9f742c	TCGA	Cancer	Uterine Carcinosarcoma	Uterus	Uterus	female	Uterus Uterine Carcinosarcoma
df6f013c-522a-4d90-8de7-c204b486cdd4	TCGA	Cancer	Uterine Carcinosarcoma	Uterus	Uterus	female	Uterus Uterine Carcinosarcoma
b3b78a8f-54ad-405d-bcd9-fad26f2f7c74	TCGA	Cancer	Uterine Carcinosarcoma	Uterus	Uterus	female	Uterus Uterine Carcinosarcoma
c88d1477-73b0-4bf5-84b4-0ecef278a77f	TCGA	Cancer	Uterine Carcinosarcoma	Uterus	Uterus	female	Uterus Uterine Carcinosarcoma
6fc392c6-2a04-43f8-b457-fec10cf8de07	TCGA	Cancer	Uterine Carcinosarcoma	Uterus	Uterus	female	Uterus Uterine Carcinosarcoma
3859c6d6-f1d4-470f-baaa-d4de5b30b28b	TCGA	Cancer	Uterine Carcinosarcoma	Uterus	Uterus	female	Uterus Uterine Carcinosarcoma
ff457981-e542-4a26-beb9-069d23cb0d86	TCGA	Cancer	Uterine Carcinosarcoma	Uterus	Uterus	female	Uterus Uterine Carcinosarcoma
22364f70-2308-4cd0-9ae7-16aac8c24000	TCGA	Cancer	Uterine Carcinosarcoma	Uterus	Uterus	female	Uterus Uterine Carcinosarcoma
eaabbb27-50f5-426d-b569-776149922d30	TCGA	Cancer	Uterine Carcinosarcoma	Uterus	Uterus	female	Uterus Uterine Carcinosarcoma
cb5045df-52e7-4377-b157-1d8a8a79b769	TCGA	Cancer	Uterine Carcinosarcoma	Uterus	Uterus	female	Uterus Uterine Carcinosarcoma
b71af913-2d1c-4f56-91f7-ab2b267dc2d0	TCGA	Cancer	Uterine Carcinosarcoma	Uterus	Uterus	female	Uterus Uterine Carcinosarcoma
c2db4fbc-ed58-4808-8974-bebd5cabc8a2	TCGA	Cancer	Uterine Carcinosarcoma	Uterus	Uterus	female	Uterus Uterine Carcinosarcoma
b25cd4ba-3f67-41c7-b00f-174cf1b99f40	TCGA	Cancer	Uterine Corpus Endometrial Carcinoma	Uterus	Uterus	female	Uterus Uterine Corpus Endometrial Carcinoma
a898fd8f-e063-4e1b-b850-260e1f7d660c	TCGA	Cancer	Uterine Corpus Endometrial Carcinoma	Uterus	Uterus	female	Uterus Uterine Corpus Endometrial Carcinoma
fefc8873-7998-4f6c-b596-8fe1538d5093	TCGA	Cancer	Uterine Corpus Endometrial Carcinoma	Uterus	Uterus	female	Uterus Uterine Corpus Endometrial Carcinoma
f652ec8a-432e-4adb-95e4-69b2a82253fe	TCGA	Cancer	Uterine Corpus Endometrial Carcinoma	Uterus	Uterus	female	Uterus Uterine Corpus Endometrial Carcinoma
3b77539f-0798-432a-bb31-443aed3b2bde	TCGA	Cancer	Uterine Corpus Endometrial Carcinoma	Uterus	Uterus	female	Uterus Uterine Corpus Endometrial Carcinoma
18c52fe6-5cb0-4e59-91a2-e9845c0527c6	TCGA	Cancer	Uterine Corpus Endometrial Carcinoma	Uterus	Uterus	female	Uterus Uterine Corpus Endometrial Carcinoma
2ea070ae-18f4-4143-be3a-1e3eaf702b6d	TCGA	Cancer	Uterine Corpus Endometrial Carcinoma	Uterus	Uterus	female	Uterus Uterine Corpus Endometrial Carcinoma
1f47581c-d63f-461d-8606-82939f2d62ae	TCGA	Cancer	Uterine Corpus Endometrial Carcinoma	Uterus	Uterus	female	Uterus Uterine Corpus Endometrial Carcinoma
983ce71e-50b8-4b47-8120-526f44a4e726	TCGA	Cancer	Uterine Corpus Endometrial Carcinoma	Uterus	Uterus	female	Uterus Uterine Corpus Endometrial Carcinoma
74ad14a3-1771-4ba8-9e37-e371784f4c8f	TCGA	Cancer	Uterine Corpus Endometrial Carcinoma	Uterus	Uterus	female	Uterus Uterine Corpus Endometrial Carcinoma
51225a41-58b2-4f7d-ab31-d866dcac3c72	TCGA	Cancer	Uterine Corpus Endometrial Carcinoma	Uterus	Uterus	female	Uterus Uterine Corpus Endometrial Carcinoma
57ee9ee6-af9a-4e16-acba-4ca5db1bc93a	TCGA	Cancer	Uterine Corpus Endometrial Carcinoma	Uterus	Uterus	female	Uterus Uterine Corpus Endometrial Carcinoma
e4927137-257e-4971-a82c-5cd6eb711375	TCGA	Cancer	Uterine Corpus Endometrial Carcinoma	Uterus	Uterus	female	Uterus Uterine Corpus Endometrial Carcinoma
23a1ea74-f82f-410c-b4c0-645301727f1d	TCGA	Cancer	Uterine Corpus Endometrial Carcinoma	Uterus	Uterus	female	Uterus Uterine Corpus Endometrial Carcinoma
3f4dc762-27a9-43d2-9f8c-5407a65d8c27	TCGA	Cancer	Uterine Corpus Endometrial Carcinoma	Uterus	Uterus	female	Uterus Uterine Corpus Endometrial Carcinoma
bd93c6fe-d81b-43f6-8eaa-0e019a8cc1c9	TCGA	Cancer	Uterine Corpus Endometrial Carcinoma	Uterus	Uterus	female	Uterus Uterine Corpus Endometrial Carcinoma
125b4203-3b31-41c1-a8df-cf9d879ab352	TCGA	Cancer	Uterine Corpus Endometrial Carcinoma	Uterus	Uterus	female	Uterus Uterine Corpus Endometrial Carcinoma
0976e33a-1f76-4a15-b7e3-0133813051ab	TCGA	Cancer	Uterine Corpus Endometrial Carcinoma	Uterus	Uterus	female	Uterus Uterine Corpus Endometrial Carcinoma
82a76141-1c0e-4045-a1e8-a71dc6da0e40	TCGA	Cancer	Uterine Corpus Endometrial Carcinoma	Uterus	Uterus	female	Uterus Uterine Corpus Endometrial Carcinoma
ff3250a6-6d94-4033-8bb0-8d90f03a9257	TCGA	Cancer	Uterine Corpus Endometrial Carcinoma	Uterus	Uterus	female	Uterus Uterine Corpus Endometrial Carcinoma
227a3805-19ea-447e-8c8c-b4b7971606a1	TCGA	Cancer	Uterine Corpus Endometrial Carcinoma	Uterus	Uterus	female	Uterus Uterine Corpus Endometrial Carcinoma
33629d84-b1e8-485b-a61f-c0700c36ab7f	TCGA	Cancer	Uterine Corpus Endometrial Carcinoma	Uterus	Uterus	female	Uterus Uterine Corpus Endometrial Carcinoma
cba79c02-69e6-44eb-aa0a-685734266861	TCGA	Cancer	Uterine Corpus Endometrial Carcinoma	Uterus	Uterus	female	Uterus Uterine Corpus Endometrial Carcinoma
6668d6f0-4c83-4f02-afc2-b7a5ded3eab9	TCGA	Cancer	Uterine Corpus Endometrial Carcinoma	Uterus	Uterus	female	Uterus Uterine Corpus Endometrial Carcinoma

## Sheet: Supplemental_Table_S2
Supplemental_Table_S2. Healthy control samples used for quantitation
sampleID	consortium	disease	project_disease_type	tissue_origin	organism_part	gender
bb07f902-6195-45ef-88f8-71152a5b4da2	TCGA	Normal	Pheochromocytoma and Paraganglioma	Adrenal Gland	Adrenal Gland	female
2b2c3838-979e-48fd-869f-4a9b27174bc0	TCGA	Normal	Pheochromocytoma and Paraganglioma	Adrenal Gland	Adrenal Gland	male
153dc161-0e70-454a-b5a6-ebeef2de5c0a	TCGA	Normal	Pheochromocytoma and Paraganglioma	Adrenal Gland	Adrenal Gland	male
SRR1341854	GTEx	Normal	Normal	Adrenal Gland	adrenal gland	female
SRR1310231	GTEx	Normal	Normal	Adrenal Gland	adrenal gland	male
SRR1480831	GTEx	Normal	Normal	Adrenal Gland	adrenal gland	female
SRR1392525	GTEx	Normal	Normal	Adrenal Gland	adrenal gland	female
SRR1479977	GTEx	Normal	Normal	Adrenal Gland	adrenal gland	female
SRR1469369	GTEx	Normal	Normal	Adrenal Gland	adrenal gland	female
SRR1320536	GTEx	Normal	Normal	Adrenal Gland	adrenal gland	male
SRR1445111	GTEx	Normal	Normal	Adrenal Gland	adrenal gland	male
SRR1083824	GTEx	Normal	Normal	Adrenal Gland	adrenal gland	female
SRR1319363	GTEx	Normal	Normal	Adrenal Gland	adrenal gland	male
SRR1400141	GTEx	Normal	Normal	Adrenal Gland	adrenal gland	male
SRR1485563	GTEx	Normal	Normal	Adrenal Gland	adrenal gland	male
fecb2745-9c20-45f7-9727-392f7a6e1a10	TCGA	Normal	Cholangiocarcinoma	Bile Duct	Bile Duct	female
4b47bbc4-bf80-4023-b08a-2e87e77e5240	TCGA	Normal	Cholangiocarcinoma	Bile Duct	Bile Duct	male
8d017067-46a2-4cb8-8d99-25363eea9abb	TCGA	Normal	Cholangiocarcinoma	Bile Duct	Bile Duct	male
d38f0064-13b5-47dd-b3aa-aa2d1504abc5	TCGA	Normal	Cholangiocarcinoma	Bile Duct	Bile Duct	male
d46e6479-edde-46c1-a521-2b4bb6844530	TCGA	Normal	Cholangiocarcinoma	Bile Duct	Bile Duct	female
98d86abb-a31a-431b-ae3d-33c3d4578a49	TCGA	Normal	Cholangiocarcinoma	Bile Duct	Bile Duct	female
ca79b8b7-ba3e-42de-a3b4-c7b624b6864a	TCGA	Normal	Cholangiocarcinoma	Bile Duct	Bile Duct	male
9301c714-df7f-47f2-a604-aabfc3822755	TCGA	Normal	Cholangiocarcinoma	Bile Duct	Bile Duct	male
f1eaca04-417c-493d-b3e1-bc8ead325651	TCGA	Normal	Cholangiocarcinoma	Bile Duct	Bile Duct	male
18f43819-4f21-4dd0-b626-adf636bd685f	TCGA	Normal	Bladder Urothelial Carcinoma	Bladder	Bladder	male
06cd399b-c3d5-44fc-b0be-f3fe0b866efd	TCGA	Normal	Bladder Urothelial Carcinoma	Bladder	Bladder	female
2a92b31c-23ef-4fd8-922d-bb8660a121dc	TCGA	Normal	Bladder Urothelial Carcinoma	Bladder	Bladder	female
8f02d3d3-8306-4f9e-82a7-20e569c1ddcc	TCGA	Normal	Bladder Urothelial Carcinoma	Bladder	Bladder	male
76b9e5f3-e28c-4de0-b1f1-83c6ae661377	TCGA	Normal	Bladder Urothelial Carcinoma	Bladder	Bladder	male
c89fc750-8eb8-4734-af48-4e19ed8960e2	TCGA	Normal	Bladder Urothelial Carcinoma	Bladder	Bladder	male
b454e8bd-2e65-47ff-879b-5c7dd959b361	TCGA	Normal	Bladder Urothelial Carcinoma	Bladder	Bladder	female
74873f93-be1a-433c-897d-b29acb80fea6	TCGA	Normal	Bladder Urothelial Carcinoma	Bladder	Bladder	male
a36eacf8-9bfc-4d07-a013-927588fbe18c	TCGA	Normal	Bladder Urothelial Carcinoma	Bladder	Bladder	female
9c2445fd-9d85-4505-8655-fae28c5b7afa	TCGA	Normal	Bladder Urothelial Carcinoma	Bladder	Bladder	female
928d1283-70e7-438e-a30e-18225b7db8e1	TCGA	Normal	Bladder Urothelial Carcinoma	Bladder	Bladder	female
69dbcbec-c889-43d8-ba6d-8ff52642168c	TCGA	Normal	Bladder Urothelial Carcinoma	Bladder	Bladder	female
SRR1097296	GTEx	Normal	Normal	Bladder	urinary bladder	female
SRR1099957	GTEx	Normal	Normal	Bladder	urinary bladder	male
SRR1081765	GTEx	Normal	Normal	Bladder	urinary bladder	male
SRR1093930	GTEx	Normal	Normal	Bladder	urinary bladder	female
SRR1092208	GTEx	Normal	Normal	Bladder	urinary bladder	female
SRR1085402	GTEx	Normal	Normal	Bladder	urinary bladder	male
SRR1084917	GTEx	Normal	Normal	Bladder	urinary bladder	male
SRR1086236	GTEx	Normal	Normal	Bladder	urinary bladder	female
SRR1071717	GTEx	Normal	Normal	Bladder	urinary bladder	male
SRR1120296	GTEx	Normal	Normal	Bladder	urinary bladder	female
SRR1079830	GTEx	Normal	Normal	Bladder	urinary bladder	male
SRR1459033	GTEx	Normal	Normal	Brain	cerebellum	male
SRR1312743	GTEx	Normal	Normal	Brain	hippocampus proper	male
SRR1320180	GTEx	Normal	Normal	Brain	nucleus accumbens	female
SRR1447393	GTEx	Normal	Normal	Brain	caudate nucleus	male
SRR1310008	GTEx	Normal	Normal	Brain	cerebral cortex	male
SRR1310623	GTEx	Normal	Normal	Brain	C1 segment of cervical spinal cord	male
SRR1440699	GTEx	Normal	Normal	Brain	substantia nigra	female
SRR1360128	GTEx	Normal	Normal	Brain	Brodmann (1909) area 9	male
SRR1401295	GTEx	Normal	Normal	Brain	C1 segment of cervical spinal cord	male
SRR1370240	GTEx	Normal	Normal	Brain	Brodmann (1909) area 24	female
SRR1375271	GTEx	Normal	Normal	Brain	cerebellum	female
SRR1370262	GTEx	Normal	Normal	Brain	nucleus accumbens	female
SRR1316940	GTEx	Normal	Normal	Brain	Brodmann (1909) area 9	male
SRR1485789	GTEx	Normal	Normal	Brain	cerebellar hemisphere	female
SRR1365828	GTEx	Normal	Normal	Brain	caudate nucleus	female
SRR1410656	GTEx	Normal	Normal	Brain	nucleus accumbens	female
SRR1421305	GTEx	Normal	Normal	Brain	putamen	female
SRR1333352	GTEx	Normal	Normal	Brain	amygdala	female
SRR1343115	GTEx	Normal	Normal	Brain	cerebellar hemisphere	male
SRR1336379	GTEx	Normal	Normal	Brain	nucleus accumbens	male
SRR1440246	GTEx	Normal	Normal	Brain	putamen	male
SRR1335029	GTEx	Normal	Normal	Brain	cerebellar hemisphere	male
SRR1473733	GTEx	Normal	Normal	Brain	Brodmann (1909) area 24	male
SRR1332048	GTEx	Normal	Normal	Brain	putamen	male
SRR1329761	GTEx	Normal	Normal	Brain	caudate nucleus	female
SRR1356036	GTEx	Normal	Normal	Brain	hypothalamus	female
SRR1439873	GTEx	Normal	Normal	Brain	Brodmann (1909) area 9	male
SRR1382570	GTEx	Normal	Normal	Brain	caudate nucleus	male
SRR1354446	GTEx	Normal	Normal	Brain	Brodmann (1909) area 9	female
SRR1348339	GTEx	Normal	Normal	Brain	hippocampus proper	female
SRR1420493	GTEx	Normal	Normal	Brain	substantia nigra	female
SRR1319837	GTEx	Normal	Normal	Brain	hypothalamus	female
SRR1477773	GTEx	Normal	Normal	Brain	cerebellar hemisphere	male
SRR1337098	GTEx	Normal	Normal	Brain	Brodmann (1909) area 9	female
SRR1451897	GTEx	Normal	Normal	Brain	cerebellar hemisphere	female
SRR1339218	GTEx	Normal	Normal	Brain	caudate nucleus	female
SRR1330546	GTEx	Normal	Normal	Brain	substantia nigra	male
SRR1465337	GTEx	Normal	Normal	Brain	hypothalamus	male
SRR1318426	GTEx	Normal	Normal	Brain	Brodmann (1909) area 24	male
SRR1453932	GTEx	Normal	Normal	Brain	C1 segment of cervical spinal cord	male
SRR1429329	GTEx	Normal	Normal	Brain	C1 segment of cervical spinal cord	female
SRR1486304	GTEx	Normal	Normal	Brain	C1 segment of cervical spinal cord	male
SRR1499442	GTEx	Normal	Normal	Brain	cerebellar hemisphere	male
SRR1472394	GTEx	Normal	Normal	Brain	caudate nucleus	female
SRR1491293	GTEx	Normal	Normal	Brain	putamen	male
SRR1346670	GTEx	Normal	Normal	Brain	hypothalamus	male
SRR1383633	GTEx	Normal	Normal	Brain	cerebellar hemisphere	male
SRR1489821	GTEx	Normal	Normal	Brain	amygdala	male
SRR1374414	GTEx	Normal	Normal	Brain	substantia nigra	male
SRR1375616	GTEx	Normal	Normal	Brain	caudate nucleus	male
SRR1323196	GTEx	Normal	Normal	Brain	hippocampus proper	female
SRR1473936	GTEx	Normal	Normal	Brain	amygdala	female
SRR1331597	GTEx	Normal	Normal	Brain	caudate nucleus	female
SRR1390582	GTEx	Normal	Normal	Brain	amygdala	male
SRR1338584	GTEx	Normal	Normal	Brain	hippocampus proper	male
SRR1465356	GTEx	Normal	Normal	Brain	nucleus accumbens	male
SRR1444580	GTEx	Normal	Normal	Brain	cerebral cortex	male
SRR1329334	GTEx	Normal	Normal	Brain	hypothalamus	male
SRR1455060	GTEx	Normal	Normal	Brain	cerebellar hemisphere	female
SRR1382956	GTEx	Normal	Normal	Brain	Brodmann (1909) area 24	female
SRR1387989	GTEx	Normal	Normal	Brain	C1 segment of cervical spinal cord	male
SRR1348424	GTEx	Normal	Normal	Brain	hippocampus proper	female
SRR1352554	GTEx	Normal	Normal	Brain	amygdala	female
SRR1337864	GTEx	Normal	Normal	Brain	cerebral cortex	female
SRR1464411	GTEx	Normal	Normal	Brain	C1 segment of cervical spinal cord	female
SRR1328919	GTEx	Normal	Normal	Brain	substantia nigra	male
SRR1331751	GTEx	Normal	Normal	Brain	cerebral cortex	female
SRR1367128	GTEx	Normal	Normal	Brain	amygdala	female
SRR1367943	GTEx	Normal	Normal	Brain	Brodmann (1909) area 9	male
SRR1359192	GTEx	Normal	Normal	Brain	nucleus accumbens	male
SRR1375976	GTEx	Normal	Normal	Brain	cerebral cortex	male
SRR1336660	GTEx	Normal	Normal	Brain	Brodmann (1909) area 24	female
SRR1499630	GTEx	Normal	Normal	Brain	putamen	male
SRR1474951	GTEx	Normal	Normal	Brain	cerebral cortex	male
SRR1376597	GTEx	Normal	Normal	Brain	nucleus accumbens	female
SRR1471943	GTEx	Normal	Normal	Brain	Brodmann (1909) area 9	male
SRR1315019	GTEx	Normal	Normal	Brain	Brodmann (1909) area 24	female
SRR1359649	GTEx	Normal	Normal	Brain	hypothalamus	male
SRR1315269	GTEx	Normal	Normal	Brain	cerebral cortex	male
SRR1436444	GTEx	Normal	Normal	Brain	cerebellum	female
SRR1359123	GTEx	Normal	Normal	Brain	amygdala	male
SRR1381566	GTEx	Normal	Normal	Brain	nucleus accumbens	female
SRR1360563	GTEx	Normal	Normal	Brain	Brodmann (1909) area 9	female
SRR1442356	GTEx	Normal	Normal	Brain	cerebellum	female
SRR607311	GTEx	Normal	Normal	Brain	cerebellum	male
SRR599192	GTEx	Normal	Normal	Brain	caudate nucleus	female
SRR601287	GTEx	Normal	Normal	Brain	putamen	female
SRR601787	GTEx	Normal	Normal	Brain	substantia nigra	male
SRR608574	GTEx	Normal	Normal	Brain	hypothalamus	female
SRR627462	GTEx	Normal	Normal	Brain	cerebellum	male
SRR821602	GTEx	Normal	Normal	Brain	Brodmann (1909) area 9	female
SRR602131	GTEx	Normal	Normal	Brain	hypothalamus	female
SRR1073755	GTEx	Normal	Normal	Brain	C1 segment of cervical spinal cord	female
SRR608002	GTEx	Normal	Normal	Brain	Brodmann (1909) area 24	male
SRR662570	GTEx	Normal	Normal	Brain	cerebellar hemisphere	male
SRR1440058	GTEx	Normal	Normal	Brain	Brodmann (1909) area 24	male
SRR658129	GTEx	Normal	Normal	Brain	Brodmann (1909) area 24	male
SRR615934	GTEx	Normal	Normal	Brain	substantia nigra	female
SRR602169	GTEx	Normal	Normal	Brain	hippocampus proper	female
SRR602540	GTEx	Normal	Normal	Brain	putamen	female
SRR598862	GTEx	Normal	Normal	Brain	hypothalamus	female
SRR602598	GTEx	Normal	Normal	Brain	C1 segment of cervical spinal cord	female
SRR661973	GTEx	Normal	Normal	Brain	Brodmann (1909) area 9	female
SRR661290	GTEx	Normal	Normal	Brain	cerebellar hemisphere	female
SRR660638	GTEx	Normal	Normal	Brain	substantia nigra	female
SRR659602	GTEx	Normal	Normal	Brain	Brodmann (1909) area 24	female
SRR665334	GTEx	Normal	Normal	Brain	nucleus accumbens	female
SRR655111	GTEx	Normal	Normal	Brain	substantia nigra	male
SRR657325	GTEx	Normal	Normal	Brain	cerebellum	male
SRR661255	GTEx	Normal	Normal	Brain	hippocampus proper	female
SRR660661	GTEx	Normal	Normal	Brain	C1 segment of cervical spinal cord	female
SRR654874	GTEx	Normal	Normal	Brain	cerebral cortex	female
SRR613270	GTEx	Normal	Normal	Brain	cerebellum	male
SRR614455	GTEx	Normal	Normal	Brain	putamen	female
SRR658977	GTEx	Normal	Normal	Brain	hippocampus proper	male
SRR661179	GTEx	Normal	Normal	Brain	hypothalamus	male
SRR656179	GTEx	Normal	Normal	Brain	cerebellar hemisphere	female
SRR665670	GTEx	Normal	Normal	Brain	substantia nigra	female
SRR812012	GTEx	Normal	Normal	Brain	cerebral cortex	male
SRR656516	GTEx	Normal	Normal	Brain	amygdala	male
SRR656564	GTEx	Normal	Normal	Brain	hippocampus proper	female
SRR660330	GTEx	Normal	Normal	Brain	amygdala	female
SRR659013	GTEx	Normal	Normal	Brain	hypothalamus	female
SRR660103	GTEx	Normal	Normal	Brain	hippocampus proper	male
SRR656552	GTEx	Normal	Normal	Brain	caudate nucleus	male
SRR820518	GTEx	Normal	Normal	Brain	substantia nigra	male
SRR817190	GTEx	Normal	Normal	Brain	cerebellum	male
SRR818418	GTEx	Normal	Normal	Brain	amygdala	male
SRR815232	GTEx	Normal	Normal	Brain	cerebellum	female
SRR810319	GTEx	Normal	Normal	Brain	cerebral cortex	female
SRR819370	GTEx	Normal	Normal	Brain	hippocampus proper	male
SRR819346	GTEx	Normal	Normal	Brain	amygdala	female
SRR1360718	GTEx	Normal	Normal	Brain	putamen	female
SRR817856	GTEx	Normal	Normal	Brain	hippocampus proper	male
SRR1085015	GTEx	Normal	Normal	Brain	amygdala	male
SRR1078347	GTEx	Normal	Normal	Brain	Brodmann (1909) area 24	male
SRR1406976	GTEx	Normal	Normal	Brain	putamen	male
SRR1455171	GTEx	Normal	Normal	Brain	substantia nigra	female
SRR1362219	GTEx	Normal	Normal	Brain	Brodmann (1909) area 24	female
SRR1323603	GTEx	Normal	Normal	Brain	C1 segment of cervical spinal cord	female
SRR1469904	GTEx	Normal	Normal	Brain	cerebral cortex	female
SRR1475609	GTEx	Normal	Normal	Brain	C1 segment of cervical spinal cord	male
SRR1367870	GTEx	Normal	Normal	Brain	nucleus accumbens	male
SRR1355635	GTEx	Normal	Normal	Brain	hypothalamus	male
SRR1489502	GTEx	Normal	Normal	Brain	cerebral cortex	female
SRR1457221	GTEx	Normal	Normal	Brain	caudate nucleus	male
SRR1338323	GTEx	Normal	Normal	Brain	cerebellar hemisphere	female
SRR1457551	GTEx	Normal	Normal	Brain	putamen	female
SRR1333767	GTEx	Normal	Normal	Brain	nucleus accumbens	male
SRR1364739	GTEx	Normal	Normal	Brain	putamen	male
SRR1329885	GTEx	Normal	Normal	Brain	nucleus accumbens	male
SRR1341763	GTEx	Normal	Normal	Brain	Brodmann (1909) area 9	male
SRR1388504	GTEx	Normal	Normal	Brain	cerebellum	female
SRR1453851	GTEx	Normal	Normal	Brain	Brodmann (1909) area 9	female
SRR1336006	GTEx	Normal	Normal	Brain	caudate nucleus	male
SRR1453214	GTEx	Normal	Normal	Brain	cerebellum	female
1ccf9a6b-93c2-4abc-a5a8-317b54b25c7d	TCGA	Normal	Breast Invasive Carcinoma	Breast	Breast	female
242c5c4c-1c4d-4014-bf2b-ead30ca94f3b	TCGA	Normal	Breast Invasive Carcinoma	Breast	Breast	female
f926fddb-359a-4968-b49c-d2e25ca1e1fd	TCGA	Normal	Breast Invasive Carcinoma	Breast	Breast	female
1e955781-abdf-4592-9e1d-f15f3688e5a0	TCGA	Normal	Breast Invasive Carcinoma	Breast	Breast	female
c4c4f34c-5c96-4842-87b3-012fb6fa4240	TCGA	Normal	Breast Invasive Carcinoma	Breast	Breast	female
a3dc3ba3-bc6c-4f1f-b077-c11c6ea5003f	TCGA	Normal	Breast Invasive Carcinoma	Breast	Breast	female
04732300-a896-4c46-9c59-43b84ea93315	TCGA	Normal	Breast Invasive Carcinoma	Breast	Breast	female
caa76ec4-022c-44b9-b3e3-49596f77aebc	TCGA	Normal	Breast Invasive Carcinoma	Breast	Breast	female
7d0e05d8-54f2-456f-9a9e-7f4ef582c377	TCGA	Normal	Breast Invasive Carcinoma	Breast	Breast	female
4c0fd02d-c495-49c4-b052-629c65fb3c3d	TCGA	Normal	Breast Invasive Carcinoma	Breast	Breast	female
8e733362-c90f-406b-ba70-1c65a610b3ee	TCGA	Normal	Breast Invasive Carcinoma	Breast	Breast	female
2f73cb19-5e2c-4c90-8c69-9f1c4c50758f	TCGA	Normal	Breast Invasive Carcinoma	Breast	Breast	female
SRR1457705	GTEx	Normal	Normal	Breast	breast	male
SRR1418729	GTEx	Normal	Normal	Breast	breast	female
SRR1486457	GTEx	Normal	Normal	Breast	breast	male
SRR1083052	GTEx	Normal	Normal	Breast	breast	female
SRR656911	GTEx	Normal	Normal	Breast	breast	female
SRR660248	GTEx	Normal	Normal	Breast	breast	female
SRR1096987	GTEx	Normal	Normal	Breast	breast	female
SRR1437073	GTEx	Normal	Normal	Breast	breast	male
SRR1368050	GTEx	Normal	Normal	Breast	breast	male
SRR1475408	GTEx	Normal	Normal	Breast	breast	female
SRR1472102	GTEx	Normal	Normal	Breast	breast	male
SRR1420296	GTEx	Normal	Normal	Breast	breast	male
5d4192d6-2d6d-42f6-8e13-d9bf020140be	TCGA	Normal	Cervical Squamous Cell Carcinoma and Endocervical Adenocarcinoma	Cervix	Cervix	female
983ffcc8-f07e-4d2b-97a7-ad21f99080f9	TCGA	Normal	Cervical Squamous Cell Carcinoma and Endocervical Adenocarcinoma	Cervix	Cervix	female
d42c0e45-1550-46c8-837a-d74b919deb31	TCGA	Normal	Cervical Squamous Cell Carcinoma and Endocervical Adenocarcinoma	Cervix	Cervix	female
SRR1096876	GTEx	Normal	Normal	Cervix	ectocervix	female
SRR1096057	GTEx	Normal	Normal	Cervix	endocervix	female
SRR1088832	GTEx	Normal	Normal	Cervix	ectocervix	female
SRR1098612	GTEx	Normal	Normal	Cervix	endocervix	female
SRR1089562	GTEx	Normal	Normal	Cervix	ectocervix	female
SRR1075223	GTEx	Normal	Normal	Cervix	ectocervix	female
SRR1077239	GTEx	Normal	Normal	Cervix	endocervix	female
SRR1343393	GTEx	Normal	Normal	Cervix	endocervix	female
SRR1089833	GTEx	Normal	Normal	Cervix	endocervix	female
SRR1097035	GTEx	Normal	Normal	Cervix	ectocervix	female
SRR1097574	GTEx	Normal	Normal	Cervix	ectocervix	female
4a0b9aed-3e7c-4b5a-a123-8e0703094345	TCGA	Normal	Colon Adenocarcinoma	Colorectal	Colorectal	male
37360ffa-7634-4e12-87e1-cd1b50b2b0e3	TCGA	Normal	Colon Adenocarcinoma	Colorectal	Colorectal	female
78f35f00-e807-43dc-8fe4-98bcee7fd6ae	TCGA	Normal	Colon Adenocarcinoma	Colorectal	Colorectal	female
9588a53e-ad2f-4f09-b94f-23f7a5a47b2b	TCGA	Normal	Colon Adenocarcinoma	Colorectal	Colorectal	female
46322c2e-a3d7-46cf-8107-6dec35a66689	TCGA	Normal	Colon Adenocarcinoma	Colorectal	Colorectal	female
511336f1-e7fd-40fa-a4ed-df3730076095	TCGA	Normal	Colon Adenocarcinoma	Colorectal	Colorectal	female
8127208d-6aac-46de-a96a-ad3879d8fa42	TCGA	Normal	Colon Adenocarcinoma	Colorectal	Colorectal	male
3ea4eb1b-812d-414d-bbc1-3051b89b0b45	TCGA	Normal	Colon Adenocarcinoma	Colorectal	Colorectal	male
4fc3df78-d758-4926-b501-0edbf5e7ddb7	TCGA	Normal	Colon Adenocarcinoma	Colorectal	Colorectal	male
0a9a59e2-65f1-47dc-a4a0-a8569d1b8eb4	TCGA	Normal	Colon Adenocarcinoma	Colorectal	Colorectal	female
7f89b77a-72c8-4eb6-9cf2-b23ec7984d73	TCGA	Normal	Colon Adenocarcinoma	Colorectal	Colorectal	male
458a3321-b0e6-4ad9-ac15-c66d4273ac1c	TCGA	Normal	Colon Adenocarcinoma	Colorectal	Colorectal	female
b7189b15-e91f-424c-b69b-95dce9a07d9c	TCGA	Normal	Rectum Adenocarcinoma	Colorectal	Colorectal	female
07c4bc1c-6f14-4569-9d59-c6e2ce371b91	TCGA	Normal	Rectum Adenocarcinoma	Colorectal	Colorectal	female
a19b9218-8c81-45cf-ad38-676c10808d70	TCGA	Normal	Rectum Adenocarcinoma	Colorectal	Colorectal	female
111b5c3a-9fb5-4ea9-8222-fb972a47abd4	TCGA	Normal	Rectum Adenocarcinoma	Colorectal	Colorectal	female
2e12a83d-7346-4e1c-86aa-ac5c2393b9fa	TCGA	Normal	Rectum Adenocarcinoma	Colorectal	Colorectal	male
ab445101-1def-4fe7-9f15-77771a34101d	TCGA	Normal	Rectum Adenocarcinoma	Colorectal	Colorectal	male
SRR1349190	GTEx	Normal	Normal	Colorectal	transverse colon	female
SRR1466770	GTEx	Normal	Normal	Colorectal	sigmoid colon	male
SRR1420413	GTEx	Normal	Normal	Colorectal	transverse colon	female
SRR1338280	GTEx	Normal	Normal	Colorectal	transverse colon	female
SRR1407693	GTEx	Normal	Normal	Colorectal	transverse colon	male
SRR1444701	GTEx	Normal	Normal	Colorectal	sigmoid colon	female
SRR1353118	GTEx	Normal	Normal	Colorectal	transverse colon	male
SRR1432783	GTEx	Normal	Normal	Colorectal	sigmoid colon	male
SRR1409326	GTEx	Normal	Normal	Colorectal	sigmoid colon	female
SRR1321377	GTEx	Normal	Normal	Colorectal	sigmoid colon	female
SRR1479370	GTEx	Normal	Normal	Colorectal	sigmoid colon	male
SRR1073899	GTEx	Normal	Normal	Colorectal	transverse colon	male
SRR1120733	GTEx	Normal	Normal	Colorectal	transverse colon	male
SRR1075729	GTEx	Normal	Normal	Colorectal	transverse colon	female
SRR1084505	GTEx	Normal	Normal	Colorectal	sigmoid colon	female
SRR1102198	GTEx	Normal	Normal	Colorectal	sigmoid colon	male
SRR1383674	GTEx	Normal	Normal	Colorectal	transverse colon	male
SRR1077380	GTEx	Normal	Normal	Colorectal	sigmoid colon	female
SRR1083678	GTEx	Normal	Normal	Colorectal	sigmoid colon	male
SRR1437514	GTEx	Normal	Normal	Colorectal	transverse colon	female
SRR1393529	GTEx	Normal	Normal	Colorectal	transverse colon	female
SRR1399291	GTEx	Normal	Normal	Colorectal	sigmoid colon	male
SRR1388722	GTEx	Normal	Normal	Colorectal	transverse colon	male
SRR1340966	GTEx	Normal	Normal	Colorectal	sigmoid colon	female
37339a90-2406-4dd9-af4d-d701df7e9b1d	TCGA	Normal	Esophageal Carcinoma	Esophagus	Esophagus	male
962f2a4f-94ff-4c7c-b90a-831cf27900fe	TCGA	Normal	Esophageal Carcinoma	Esophagus	Esophagus	male
241a9e1b-3f1a-4eca-90be-d5d48fedce6d	TCGA	Normal	Esophageal Carcinoma	Esophagus	Esophagus	male
d9a7ae54-cd1c-4b9a-a86e-1dfa19e90351	TCGA	Normal	Esophageal Carcinoma	Esophagus	Esophagus	male
4a644bab-fe70-450d-a055-d007c6495ff8	TCGA	Normal	Esophageal Carcinoma	Esophagus	Esophagus	male
cb8bef0c-012a-4eb2-8583-edd2d6cba8d6	TCGA	Normal	Esophageal Carcinoma	Esophagus	Esophagus	male
4dc12fc9-ec5c-4a7c-8c65-404c5a8737ff	TCGA	Normal	Esophageal Carcinoma	Esophagus	Esophagus	male
dccd7b9a-b12d-491d-812c-8ba41a787612	TCGA	Normal	Esophageal Carcinoma	Esophagus	Esophagus	female
9bf3db35-d868-4d76-8dd5-e0b5a3a28f2d	TCGA	Normal	Esophageal Carcinoma	Esophagus	Esophagus	male
5f7ddd47-5b4f-493b-a647-8f78321ad76b	TCGA	Normal	Esophageal Carcinoma	Esophagus	Esophagus	female
93c095f7-60d5-4ef8-8807-06fa4eb5e06b	TCGA	Normal	Esophageal Carcinoma	Esophagus	Esophagus	female
SRR1469769	GTEx	Normal	Normal	Esophagus	esophagogastric junction	female
SRR1487255	GTEx	Normal	Normal	Esophagus	esophagus mucosa	female
SRR1414708	GTEx	Normal	Normal	Esophagus	esophagus mucosa	male
SRR1321744	GTEx	Normal	Normal	Esophagus	esophagus mucosa	female
SRR1415615	GTEx	Normal	Normal	Esophagus	esophagus mucosa	male
SRR1359565	GTEx	Normal	Normal	Esophagus	esophagogastric junction	female
SRR1392922	GTEx	Normal	Normal	Esophagus	esophagus muscularis mucosa	male
SRR1414016	GTEx	Normal	Normal	Esophagus	esophagus muscularis mucosa	male
SRR1418183	GTEx	Normal	Normal	Esophagus	esophagogastric junction	male
SRR1454247	GTEx	Normal	Normal	Esophagus	esophagus muscularis mucosa	female
SRR1331730	GTEx	Normal	Normal	Esophagus	esophagus muscularis mucosa	male
SRR1416207	GTEx	Normal	Normal	Esophagus	esophagus mucosa	female
SRR1456674	GTEx	Normal	Normal	Esophagus	esophagus mucosa	male
SRR1321591	GTEx	Normal	Normal	Esophagus	esophagus muscularis mucosa	female
SRR1327769	GTEx	Normal	Normal	Esophagus	esophagus muscularis mucosa	female
SRR1323470	GTEx	Normal	Normal	Esophagus	esophagogastric junction	male
SRR813505	GTEx	Normal	Normal	Esophagus	esophagus mucosa	female
SRR1099144	GTEx	Normal	Normal	Esophagus	esophagus mucosa	male
SRR1084742	GTEx	Normal	Normal	Esophagus	esophagus muscularis mucosa	male
SRR1071011	GTEx	Normal	Normal	Esophagus	esophagus muscularis mucosa	female
SRR1080648	GTEx	Normal	Normal	Esophagus	esophagus mucosa	male
SRR1096267	GTEx	Normal	Normal	Esophagus	esophagus mucosa	male
SRR1087127	GTEx	Normal	Normal	Esophagus	esophagogastric junction	male
SRR1076535	GTEx	Normal	Normal	Esophagus	esophagus muscularis mucosa	male
SRR1096432	GTEx	Normal	Normal	Esophagus	esophagogastric junction	male
SRR1355554	GTEx	Normal	Normal	Esophagus	esophagogastric junction	female
SRR1089078	GTEx	Normal	Normal	Esophagus	esophagus muscularis mucosa	male
SRR1097954	GTEx	Normal	Normal	Esophagus	esophagus mucosa	female
SRR1416025	GTEx	Normal	Normal	Esophagus	esophagogastric junction	female
SRR1405569	GTEx	Normal	Normal	Esophagus	esophagus muscularis mucosa	female
SRR1445023	GTEx	Normal	Normal	Esophagus	esophagogastric junction	male
SRR1474374	GTEx	Normal	Normal	Esophagus	esophagogastric junction	female
SRR1479175	GTEx	Normal	Normal	Esophagus	esophagus muscularis mucosa	female
SRR1441934	GTEx	Normal	Normal	Esophagus	esophagogastric junction	female
SRR1375394	GTEx	Normal	Normal	Esophagus	esophagogastric junction	male
SRR1434161	GTEx	Normal	Normal	Esophagus	esophagus mucosa	female
3feaa12e-0757-4f34-b68d-818e3adc6321	TCGA	Normal	Head and Neck Squamous Cell Carcinoma	Head and Neck	Head and Neck	male
6aa0a3c3-7a88-4401-b00d-b444334a9f4c	TCGA	Normal	Head and Neck Squamous Cell Carcinoma	Head and Neck	Head and Neck	male
6998dbbb-4db5-4e25-a970-2535fb4c2795	TCGA	Normal	Head and Neck Squamous Cell Carcinoma	Head and Neck	Head and Neck	male
51006178-1d95-4fff-ab12-55946a3e0eb6	TCGA	Normal	Head and Neck Squamous Cell Carcinoma	Head and Neck	Head and Neck	female
f8bedde0-97eb-4ad8-b50c-0f29c43b8482	TCGA	Normal	Head and Neck Squamous Cell Carcinoma	Head and Neck	Head and Neck	female
abc53910-8d01-40fd-8fd4-0dd753ddeba0	TCGA	Normal	Head and Neck Squamous Cell Carcinoma	Head and Neck	Head and Neck	female
706020d5-dc4c-4f6b-ab37-2c8d6770a528	TCGA	Normal	Head and Neck Squamous Cell Carcinoma	Head and Neck	Head and Neck	male
b297ec81-8329-488d-8368-2353ac3b5f73	TCGA	Normal	Head and Neck Squamous Cell Carcinoma	Head and Neck	Head and Neck	male
2219f518-6d0f-445a-9364-d8a1981f7bfc	TCGA	Normal	Head and Neck Squamous Cell Carcinoma	Head and Neck	Head and Neck	female
8f0e40ca-fffd-4c44-9190-2d8bbbe2795b	TCGA	Normal	Head and Neck Squamous Cell Carcinoma	Head and Neck	Head and Neck	male
6418f97a-2596-400b-b16c-45f0c05a178c	TCGA	Normal	Head and Neck Squamous Cell Carcinoma	Head and Neck	Head and Neck	male
83da07b9-8480-4eec-96ab-90de03c784b6	TCGA	Normal	Head and Neck Squamous Cell Carcinoma	Head and Neck	Head and Neck	male
40887a1c-9035-4bdd-98f6-8ede8c000916	TCGA	Normal	Kidney Renal Clear Cell Carcinoma	Kidney	Kidney	male
170d6409-f0b3-4c29-b74e-2677f2802963	TCGA	Normal	Kidney Renal Clear Cell Carcinoma	Kidney	Kidney	male
d246addc-2634-449a-8940-086cc752415f	TCGA	Normal	Kidney Renal Clear Cell Carcinoma	Kidney	Kidney	male
3f684e89-a2c5-469f-8271-32312440cce3	TCGA	Normal	Kidney Renal Clear Cell Carcinoma	Kidney	Kidney	male
c51333cf-d7a1-425e-936b-c95e456aff76	TCGA	Normal	Kidney Renal Clear Cell Carcinoma	Kidney	Kidney	male
9aa5248e-6e60-440d-bc7e-47afc639e72b	TCGA	Normal	Kidney Renal Clear Cell Carcinoma	Kidney	Kidney	female
af8d5dc2-d607-43fe-b05a-ace5f78d6d3f	TCGA	Normal	Kidney Renal Clear Cell Carcinoma	Kidney	Kidney	male
bd087e8d-c7f1-4d9e-92f5-6826f18fcbfb	TCGA	Normal	Kidney Renal Clear Cell Carcinoma	Kidney	Kidney	male
aa669f77-ef16-4290-a390-7892d2bad455	TCGA	Normal	Kidney Renal Clear Cell Carcinoma	Kidney	Kidney	male
e3c14754-0156-4cb4-88ef-d1c27af56730	TCGA	Normal	Kidney Renal Clear Cell Carcinoma	Kidney	Kidney	male
fa935206-889d-4b51-b538-2bf48de48726	TCGA	Normal	Kidney Renal Clear Cell Carcinoma	Kidney	Kidney	male
ab85be8b-c8d2-4959-92fe-f454da968ff5	TCGA	Normal	Kidney Renal Clear Cell Carcinoma	Kidney	Kidney	male
fc84d313-14f6-49ee-8dab-5cffeea4a923	TCGA	Normal	Kidney Renal Papillary Cell Carcinoma	Kidney	Kidney	male
d0fd90b0-2df9-4cc5-8f26-f9248b9676e9	TCGA	Normal	Kidney Renal Papillary Cell Carcinoma	Kidney	Kidney	male
34d8892b-a089-46db-89c1-0d6646a107b8	TCGA	Normal	Kidney Renal Papillary Cell Carcinoma	Kidney	Kidney	male
6789650a-d287-406a-a0b2-1c7c103bc4ad	TCGA	Normal	Kidney Renal Papillary Cell Carcinoma	Kidney	Kidney	male
a90bca93-d97e-4af6-8c0a-269b0cf8f9df	TCGA	Normal	Kidney Renal Papillary Cell Carcinoma	Kidney	Kidney	male
742b8696-e382-47f9-8ec8-f9fd8a51e694	TCGA	Normal	Kidney Renal Papillary Cell Carcinoma	Kidney	Kidney	male
075ace13-49ad-4aef-85e5-69a7ddcdd3cf	TCGA	Normal	Kidney Renal Papillary Cell Carcinoma	Kidney	Kidney	female
4f495956-4b59-4c6e-9e1b-0feb04f692cc	TCGA	Normal	Kidney Renal Papillary Cell Carcinoma	Kidney	Kidney	male
b71fe2c1-139f-4dd7-b6af-3c9983ebe802	TCGA	Normal	Kidney Renal Papillary Cell Carcinoma	Kidney	Kidney	male
598a6d58-515e-468e-900f-81b7b46825e7	TCGA	Normal	Kidney Renal Papillary Cell Carcinoma	Kidney	Kidney	female
c7c12dca-70bc-46b9-be57-35407f83fd61	TCGA	Normal	Kidney Renal Papillary Cell Carcinoma	Kidney	Kidney	female
6964d1cf-b7c3-4990-9eaf-b8db98c1b869	TCGA	Normal	Kidney Renal Papillary Cell Carcinoma	Kidney	Kidney	female
SRR1416516	GTEx	Normal	Normal	Kidney	cortex of kidney	male
SRR1465871	GTEx	Normal	Normal	Kidney	cortex of kidney	female
SRR1377578	GTEx	Normal	Normal	Kidney	cortex of kidney	female
SRR1486080	GTEx	Normal	Normal	Kidney	cortex of kidney	female
SRR1314940	GTEx	Normal	Normal	Kidney	cortex of kidney	female
SRR1325483	GTEx	Normal	Normal	Kidney	cortex of kidney	male
SRR810007	GTEx	Normal	Normal	Kidney	cortex of kidney	male
SRR1089504	GTEx	Normal	Normal	Kidney	cortex of kidney	male
SRR1071807	GTEx	Normal	Normal	Kidney	cortex of kidney	male
SRR1437274	GTEx	Normal	Normal	Kidney	cortex of kidney	female
SRR1490658	GTEx	Normal	Normal	Kidney	cortex of kidney	male
SRR1435730	GTEx	Normal	Normal	Kidney	cortex of kidney	female
704e2cee-ed01-4c98-99c6-745ae4864781	TCGA	Normal	Liver Hepatocellular Carcinoma	Liver	Liver	male
95675a63-1eab-455e-9725-dc15563e3487	TCGA	Normal	Liver Hepatocellular Carcinoma	Liver	Liver	female
3916f71c-19da-44e1-b967-c81db579e130	TCGA	Normal	Liver Hepatocellular Carcinoma	Liver	Liver	male
bd63c124-f645-4191-94d4-415ce2dc48aa	TCGA	Normal	Liver Hepatocellular Carcinoma	Liver	Liver	female
a25514b8-d845-4a6e-a611-cafac5b48550	TCGA	Normal	Liver Hepatocellular Carcinoma	Liver	Liver	male
108b6ade-fc49-4084-acb2-4f4d984a8cef	TCGA	Normal	Liver Hepatocellular Carcinoma	Liver	Liver	male
04eea324-164f-46a1-9869-5f78276c7ef5	TCGA	Normal	Liver Hepatocellular Carcinoma	Liver	Liver	female
bb1c8ac1-e42d-49c0-a25b-3d2c7e3bb250	TCGA	Normal	Liver Hepatocellular Carcinoma	Liver	Liver	male
b7f59990-bb5e-43b3-bdc8-09f6c6f67f8e	TCGA	Normal	Liver Hepatocellular Carcinoma	Liver	Liver	male
d3b84872-b301-4f29-be6e-d91cb61e6c52	TCGA	Normal	Liver Hepatocellular Carcinoma	Liver	Liver	male
a5d2cab6-4893-4aea-abf0-e3a3c332fcce	TCGA	Normal	Liver Hepatocellular Carcinoma	Liver	Liver	male
fb3e8cf5-88fa-4cf9-9346-450e34ca74a3	TCGA	Normal	Liver Hepatocellular Carcinoma	Liver	Liver	female
SRR1376852	GTEx	Normal	Normal	Liver	liver	female
SRR1317554	GTEx	Normal	Normal	Liver	liver	female
SRR1444083	GTEx	Normal	Normal	Liver	liver	male
SRR1412969	GTEx	Normal	Normal	Liver	liver	male
SRR1414515	GTEx	Normal	Normal	Liver	liver	male
SRR1375721	GTEx	Normal	Normal	Liver	liver	male
SRR1071668	GTEx	Normal	Normal	Liver	liver	female
SRR1073435	GTEx	Normal	Normal	Liver	liver	male
SRR1089446	GTEx	Normal	Normal	Liver	liver	female
SRR1389384	GTEx	Normal	Normal	Liver	liver	female
SRR1349479	GTEx	Normal	Normal	Liver	liver	male
SRR1490546	GTEx	Normal	Normal	Liver	liver	female
821336cd-4fc5-4050-8e19-92549c352dce	TCGA	Normal	Lung Adenocarcinoma	Lung	Lung	male
766f3ef2-d1a3-46a8-9881-966e8e2b9b02	TCGA	Normal	Lung Adenocarcinoma	Lung	Lung	female
fb58711e-3506-44e3-b668-e69a823a2f81	TCGA	Normal	Lung Adenocarcinoma	Lung	Lung	male
e3d8e66a-e824-4cd9-8286-82ea6e89c61b	TCGA	Normal	Lung Adenocarcinoma	Lung	Lung	female
4f4a304b-0e65-467e-b07e-155c528ceb15	TCGA	Normal	Lung Adenocarcinoma	Lung	Lung	female
db070141-5d9d-448c-9f97-a0737762c9c2	TCGA	Normal	Lung Adenocarcinoma	Lung	Lung	male
1b9642cd-d963-4251-a929-b499516a3f82	TCGA	Normal	Lung Adenocarcinoma	Lung	Lung	female
17d3f67c-7d54-4866-88d5-96272a8b8bee	TCGA	Normal	Lung Adenocarcinoma	Lung	Lung	female
d0979620-999f-44c7-9e8b-44548f7927ef	TCGA	Normal	Lung Adenocarcinoma	Lung	Lung	female
a4a5c7e9-c536-4e87-b337-eb5a003ba9fe	TCGA	Normal	Lung Adenocarcinoma	Lung	Lung	male
0daa1a31-b86c-4353-b403-59db8ebcb851	TCGA	Normal	Lung Adenocarcinoma	Lung	Lung	male
e3c8680d-9811-46f6-ad67-fcbe90a7643c	TCGA	Normal	Lung Adenocarcinoma	Lung	Lung	female
42ada204-c264-408d-a6f3-9ed3c8257a1f	TCGA	Normal	Lung Squamous Cell Carcinoma	Lung	Lung	female
d8a237bb-450e-44cd-8c1a-81ca6cd443f0	TCGA	Normal	Lung Squamous Cell Carcinoma	Lung	Lung	male
5cbe1295-051e-457c-afab-55b41a8d31b6	TCGA	Normal	Lung Squamous Cell Carcinoma	Lung	Lung	female
11de73cd-dc49-4247-9c3a-1c88d3748d2b	TCGA	Normal	Lung Squamous Cell Carcinoma	Lung	Lung	male
c7bd91b0-6e2c-4a35-95f0-c7249423026a	TCGA	Normal	Lung Squamous Cell Carcinoma	Lung	Lung	male
a2aa88fc-1e08-478c-99ad-cc4da64efda9	TCGA	Normal	Lung Squamous Cell Carcinoma	Lung	Lung	female
1d6a9841-eb31-44de-a5a2-e03533ca4992	TCGA	Normal	Lung Squamous Cell Carcinoma	Lung	Lung	male
9e023932-81a2-4bcd-90c5-c4c65ed573cd	TCGA	Normal	Lung Squamous Cell Carcinoma	Lung	Lung	female
99e4c0b7-efb1-43b8-8f3a-62a7a75b87f1	TCGA	Normal	Lung Squamous Cell Carcinoma	Lung	Lung	female
d6d77689-b81e-499e-a59c-780ca45d3c38	TCGA	Normal	Lung Squamous Cell Carcinoma	Lung	Lung	male
529ed74f-b681-4fc8-9a1d-b14506f4e1ab	TCGA	Normal	Lung Squamous Cell Carcinoma	Lung	Lung	male
99b903cc-a88c-4563-8aeb-252d68736388	TCGA	Normal	Lung Squamous Cell Carcinoma	Lung	Lung	male
SRR1309468	GTEx	Normal	Normal	Lung	lung	male
SRR1417088	GTEx	Normal	Normal	Lung	lung	female
SRR1443677	GTEx	Normal	Normal	Lung	lung	male
SRR1381161	GTEx	Normal	Normal	Lung	lung	male
SRR663549	GTEx	Normal	Normal	Lung	lung	male
SRR600900	GTEx	Normal	Normal	Lung	lung	female
SRR604390	GTEx	Normal	Normal	Lung	lung	female
SRR665658	GTEx	Normal	Normal	Lung	lung	female
SRR1098998	GTEx	Normal	Normal	Lung	lung	female
SRR1434048	GTEx	Normal	Normal	Lung	lung	male
SRR1471989	GTEx	Normal	Normal	Lung	lung	female
SRR1439719	GTEx	Normal	Normal	Lung	lung	male
SRR1355512	GTEx	Normal	Normal	Ovary	ovary	female
SRR1430507	GTEx	Normal	Normal	Ovary	ovary	female
SRR1458870	GTEx	Normal	Normal	Ovary	ovary	female
SRR809897	GTEx	Normal	Normal	Ovary	ovary	female
SRR814293	GTEx	Normal	Normal	Ovary	ovary	female
SRR1101859	GTEx	Normal	Normal	Ovary	ovary	female
SRR1086212	GTEx	Normal	Normal	Ovary	ovary	female
SRR1451820	GTEx	Normal	Normal	Ovary	ovary	female
SRR1356078	GTEx	Normal	Normal	Ovary	ovary	female
SRR1454607	GTEx	Normal	Normal	Ovary	ovary	female
SRR1347518	GTEx	Normal	Normal	Ovary	ovary	female
SRR1469997	GTEx	Normal	Normal	Ovary	ovary	female
d5c17ebd-f997-464e-9ffc-c4f9f8fe0dc1	TCGA	Normal	Pancreatic Adenocarcinoma	Pancreas	Pancreas	female
d4f15225-b2f4-47f4-8147-a7a6f0b62e65	TCGA	Normal	Pancreatic Adenocarcinoma	Pancreas	Pancreas	female
3e3ea95f-36e4-47a1-8e37-6a83ae711c06	TCGA	Normal	Pancreatic Adenocarcinoma	Pancreas	Pancreas	male
606c0bba-703f-4b10-813b-38ef08da90e5	TCGA	Normal	Pancreatic Adenocarcinoma	Pancreas	Pancreas	male
SRR1360766	GTEx	Normal	Normal	Pancreas	pancreas	male
SRR1374739	GTEx	Normal	Normal	Pancreas	pancreas	male
SRR811607	GTEx	Normal	Normal	Pancreas	pancreas	male
SRR1088537	GTEx	Normal	Normal	Pancreas	pancreas	female
SRR657077	GTEx	Normal	Normal	Pancreas	pancreas	female
SRR1324519	GTEx	Normal	Normal	Pancreas	pancreas	female
SRR1435857	GTEx	Normal	Normal	Pancreas	pancreas	male
SRR1087728	GTEx	Normal	Normal	Pancreas	pancreas	female
SRR1330746	GTEx	Normal	Normal	Pancreas	pancreas	male
SRR1338513	GTEx	Normal	Normal	Pancreas	pancreas	male
SRR1394275	GTEx	Normal	Normal	Pancreas	pancreas	female
SRR1481146	GTEx	Normal	Normal	Pancreas	pancreas	female
8b3d4a3d-2bfa-48f8-b31f-901f49a5bf6b	TCGA	Normal	Prostate Adenocarcinoma	Prostate	Prostate	male
f4c1b2b1-ba1f-4355-a1ac-3e952cf351a5	TCGA	Normal	Prostate Adenocarcinoma	Prostate	Prostate	male
01428246-ae4b-47ea-a910-fe299883a42d	TCGA	Normal	Prostate Adenocarcinoma	Prostate	Prostate	male
3ce23096-520f-457e-81bc-d39edd4c530c	TCGA	Normal	Prostate Adenocarcinoma	Prostate	Prostate	male
e06cc092-c476-46b6-b287-fc90b95f4db4	TCGA	Normal	Prostate Adenocarcinoma	Prostate	Prostate	male
7701d6c4-fc1d-4724-9dab-6c6c96147bbc	TCGA	Normal	Prostate Adenocarcinoma	Prostate	Prostate	male
8a36555b-9e27-40ee-a8df-4b15d6580a02	TCGA	Normal	Prostate Adenocarcinoma	Prostate	Prostate	male
93020b3a-9cef-40fb-8584-1203c9b86794	TCGA	Normal	Prostate Adenocarcinoma	Prostate	Prostate	male
8fe5d893-dba0-48a4-b824-3e57bbedfdc8	TCGA	Normal	Prostate Adenocarcinoma	Prostate	Prostate	male
d22a8636-cffc-40b7-8809-8ffb425cbbce	TCGA	Normal	Prostate Adenocarcinoma	Prostate	Prostate	male
306d4fe1-1515-44e0-b527-eee0e83412bf	TCGA	Normal	Prostate Adenocarcinoma	Prostate	Prostate	male
e4b5a7e7-9f33-4daa-8b85-8b354e9d3e9a	TCGA	Normal	Prostate Adenocarcinoma	Prostate	Prostate	male
SRR1486348	GTEx	Normal	Normal	Prostate	prostate gland	male
SRR1400100	GTEx	Normal	Normal	Prostate	prostate gland	male
SRR1317751	GTEx	Normal	Normal	Prostate	prostate gland	male
SRR1465375	GTEx	Normal	Normal	Prostate	prostate gland	male
SRR813108	GTEx	Normal	Normal	Prostate	prostate gland	male
SRR1091990	GTEx	Normal	Normal	Prostate	prostate gland	male
SRR1078684	GTEx	Normal	Normal	Prostate	prostate gland	male
SRR1098686	GTEx	Normal	Normal	Prostate	prostate gland	male
SRR1476507	GTEx	Normal	Normal	Prostate	prostate gland	male
SRR1489631	GTEx	Normal	Normal	Prostate	prostate gland	male
SRR1434545	GTEx	Normal	Normal	Prostate	prostate gland	male
SRR1430928	GTEx	Normal	Normal	Prostate	prostate gland	male
7e083358-486e-45c2-a954-1e88b9283bdf	TCGA	Normal	Skin Cutaneous Melanoma	Skin	Skin	male
SRR1312082	GTEx	Normal	Normal	Skin	transformed skin fibroblast	female
SRR1400078	GTEx	Normal	Normal	Skin	lower leg skin	male
SRR1329400	GTEx	Normal	Normal	Skin	lower leg skin	female
SRR1366081	GTEx	Normal	Normal	Skin	suprapubic skin	female
SRR1443507	GTEx	Normal	Normal	Skin	lower leg skin	female
SRR1401510	GTEx	Normal	Normal	Skin	suprapubic skin	female
SRR1434355	GTEx	Normal	Normal	Skin	lower leg skin	female
SRR1476426	GTEx	Normal	Normal	Skin	suprapubic skin	female
SRR1324165	GTEx	Normal	Normal	Skin	lower leg skin	male
SRR1314137	GTEx	Normal	Normal	Skin	suprapubic skin	male
SRR1332117	GTEx	Normal	Normal	Skin	lower leg skin	female
SRR1487846	GTEx	Normal	Normal	Skin	lower leg skin	male
SRR1335489	GTEx	Normal	Normal	Skin	suprapubic skin	male
SRR1479216	GTEx	Normal	Normal	Skin	suprapubic skin	female
SRR1381973	GTEx	Normal	Normal	Skin	suprapubic skin	male
SRR816839	GTEx	Normal	Normal	Skin	transformed skin fibroblast	male
SRR612659	GTEx	Normal	Normal	Skin	lower leg skin	male
SRR612503	GTEx	Normal	Normal	Skin	lower leg skin	male
SRR1075923	GTEx	Normal	Normal	Skin	transformed skin fibroblast	female
SRR660522	GTEx	Normal	Normal	Skin	lower leg skin	male
SRR1098761	GTEx	Normal	Normal	Skin	transformed skin fibroblast	male
SRR1085334	GTEx	Normal	Normal	Skin	transformed skin fibroblast	male
SRR1091278	GTEx	Normal	Normal	Skin	transformed skin fibroblast	female
SRR1094003	GTEx	Normal	Normal	Skin	transformed skin fibroblast	female
SRR657575	GTEx	Normal	Normal	Skin	lower leg skin	female
SRR1093794	GTEx	Normal	Normal	Skin	transformed skin fibroblast	male
SRR1094216	GTEx	Normal	Normal	Skin	suprapubic skin	male
SRR819844	GTEx	Normal	Normal	Skin	suprapubic skin	female
SRR1407624	GTEx	Normal	Normal	Skin	transformed skin fibroblast	male
SRR1099212	GTEx	Normal	Normal	Skin	transformed skin fibroblast	male
SRR1077826	GTEx	Normal	Normal	Skin	transformed skin fibroblast	female
SRR1075247	GTEx	Normal	Normal	Skin	suprapubic skin	male
SRR1321696	GTEx	Normal	Normal	Skin	suprapubic skin	female
SRR1478921	GTEx	Normal	Normal	Skin	transformed skin fibroblast	female
SRR1440268	GTEx	Normal	Normal	Skin	suprapubic skin	male
SRR1479866	GTEx	Normal	Normal	Skin	lower leg skin	female
8e940ae4-a294-4f74-914b-2f05949298b5	TCGA	Normal	Stomach Adenocarcinoma	Stomach	Stomach	male
bb1c5011-448f-4ff7-b329-a51064b866d7	TCGA	Normal	Stomach Adenocarcinoma	Stomach	Stomach	male
350d22ba-4371-40b9-bc83-cacfb9109b49	TCGA	Normal	Stomach Adenocarcinoma	Stomach	Stomach	male
9f3cba19-0559-447e-a5c9-1904b7d8fc02	TCGA	Normal	Stomach Adenocarcinoma	Stomach	Stomach	male
089a6966-9e76-4442-98a3-0c2cea364978	TCGA	Normal	Stomach Adenocarcinoma	Stomach	Stomach	male
8672ce81-5df8-4464-bbf4-ac124d58ced5	TCGA	Normal	Stomach Adenocarcinoma	Stomach	Stomach	female
c8375df3-03d2-43da-a262-718a810031c9	TCGA	Normal	Stomach Adenocarcinoma	Stomach	Stomach	male
9bf70fda-4b07-41b4-86f5-0293cbb80f78	TCGA	Normal	Stomach Adenocarcinoma	Stomach	Stomach	male
524ebba1-4074-4e58-9163-7f9fda69b6c3	TCGA	Normal	Stomach Adenocarcinoma	Stomach	Stomach	female
4105cc38-24a5-421c-b9f3-1562c4e8e82f	TCGA	Normal	Stomach Adenocarcinoma	Stomach	Stomach	female
b0ecb001-e045-4f1a-92ea-f27eb4aa6a09	TCGA	Normal	Stomach Adenocarcinoma	Stomach	Stomach	male
7e24f6fc-e341-43a7-b1b3-7688c6b30f15	TCGA	Normal	Stomach Adenocarcinoma	Stomach	Stomach	male
SRR1347082	GTEx	Normal	Normal	Stomach	stomach	male
SRR1331858	GTEx	Normal	Normal	Stomach	stomach	female
SRR1417749	GTEx	Normal	Normal	Stomach	stomach	female
SRR1364641	GTEx	Normal	Normal	Stomach	stomach	male
SRR1476760	GTEx	Normal	Normal	Stomach	stomach	female
SRR814195	GTEx	Normal	Normal	Stomach	stomach	female
SRR1083262	GTEx	Normal	Normal	Stomach	stomach	male
SRR1071761	GTEx	Normal	Normal	Stomach	stomach	female
SRR1089737	GTEx	Normal	Normal	Stomach	stomach	male
SRR1430860	GTEx	Normal	Normal	Stomach	stomach	female
SRR1478855	GTEx	Normal	Normal	Stomach	stomach	male
SRR1343175	GTEx	Normal	Normal	Stomach	stomach	male
SRR1358260	GTEx	Normal	Normal	Testis	testis	male
SRR1389018	GTEx	Normal	Normal	Testis	testis	male
SRR1335338	GTEx	Normal	Normal	Testis	testis	male
SRR1328125	GTEx	Normal	Normal	Testis	testis	male
SRR807517	GTEx	Normal	Normal	Testis	testis	male
SRR1380699	GTEx	Normal	Normal	Testis	testis	male
SRR1081449	GTEx	Normal	Normal	Testis	testis	male
SRR1120847	GTEx	Normal	Normal	Testis	testis	male
SRR1081614	GTEx	Normal	Normal	Testis	testis	male
SRR1486439	GTEx	Normal	Normal	Testis	testis	male
SRR1352597	GTEx	Normal	Normal	Testis	testis	male
SRR1345347	GTEx	Normal	Normal	Testis	testis	male
0a3215fd-7ee8-4379-be19-e18332f94beb	TCGA	Normal	Thymoma	Thymus	Thymus	female
dbb2a989-3b5c-4c42-8097-ce20470f6846	TCGA	Normal	Thymoma	Thymus	Thymus	female
4bc43cce-75ca-40eb-990f-a00ce0add413	TCGA	Normal	Thyroid Carcinoma	Thyroid	Thyroid	female
b9a2466b-34b9-48ac-95ad-15927cb026df	TCGA	Normal	Thyroid Carcinoma	Thyroid	Thyroid	male
b5e42ffc-c342-466e-a542-7a2177e4338d	TCGA	Normal	Thyroid Carcinoma	Thyroid	Thyroid	male
58daefa9-b7bb-4285-bc16-cc56fbafaddd	TCGA	Normal	Thyroid Carcinoma	Thyroid	Thyroid	female
cabc2632-e822-444a-a229-d64a9cd5760a	TCGA	Normal	Thyroid Carcinoma	Thyroid	Thyroid	female
8df7ff21-c6d1-48a4-98a9-47197d7f17fb	TCGA	Normal	Thyroid Carcinoma	Thyroid	Thyroid	female
f36730b4-d8aa-4b2d-9dc5-73c663a6f686	TCGA	Normal	Thyroid Carcinoma	Thyroid	Thyroid	female
3180d879-a1c2-40fd-b42d-95c617202cd6	TCGA	Normal	Thyroid Carcinoma	Thyroid	Thyroid	female
a35e65c0-7a64-46d4-abcb-a5c640bf12b9	TCGA	Normal	Thyroid Carcinoma	Thyroid	Thyroid	female
2a8dd221-b95a-4d6b-baaa-573f9b6ce1cc	TCGA	Normal	Thyroid Carcinoma	Thyroid	Thyroid	female
08115b44-0266-4b4f-8772-1579f0dc7a9d	TCGA	Normal	Thyroid Carcinoma	Thyroid	Thyroid	male
e2847248-97d3-4cfc-8cb1-2cee0a0181e8	TCGA	Normal	Thyroid Carcinoma	Thyroid	Thyroid	female
SRR1409875	GTEx	Normal	Normal	Thyroid	thyroid gland	female
SRR1419211	GTEx	Normal	Normal	Thyroid	thyroid gland	female
SRR1376497	GTEx	Normal	Normal	Thyroid	thyroid gland	female
SRR603834	GTEx	Normal	Normal	Thyroid	thyroid gland	male
SRR601962	GTEx	Normal	Normal	Thyroid	thyroid gland	male
SRR661409	GTEx	Normal	Normal	Thyroid	thyroid gland	female
SRR1095937	GTEx	Normal	Normal	Thyroid	thyroid gland	female
SRR1435113	GTEx	Normal	Normal	Thyroid	thyroid gland	female
SRR1343433	GTEx	Normal	Normal	Thyroid	thyroid gland	male
SRR1327366	GTEx	Normal	Normal	Thyroid	thyroid gland	male
SRR1434760	GTEx	Normal	Normal	Thyroid	thyroid gland	male
SRR1441483	GTEx	Normal	Normal	Thyroid	thyroid gland	male
6bc83e0e-bb0e-4f05-a065-3c575f031ab8	TCGA	Normal	Uterine Corpus Endometrial Carcinoma	Uterus	Uterus	female
d11ab86d-cbe1-4d6c-8920-bb6c71df44da	TCGA	Normal	Uterine Corpus Endometrial Carcinoma	Uterus	Uterus	female
d2ebbba7-3092-4168-a1f1-55c61f73daeb	TCGA	Normal	Uterine Corpus Endometrial Carcinoma	Uterus	Uterus	female
88d62d29-a483-4500-8d94-d71b799feba1	TCGA	Normal	Uterine Corpus Endometrial Carcinoma	Uterus	Uterus	female
1369838c-39b4-4afa-a2b4-ed54713918c4	TCGA	Normal	Uterine Corpus Endometrial Carcinoma	Uterus	Uterus	female
2c062d4f-48a8-4599-abc4-4bc8a73ad939	TCGA	Normal	Uterine Corpus Endometrial Carcinoma	Uterus	Uterus	female
d98b9d1d-fe97-44ae-b268-a18156ef50b9	TCGA	Normal	Uterine Corpus Endometrial Carcinoma	Uterus	Uterus	female
b97c08e9-0b6b-4993-8cbd-c5dfd69a85dc	TCGA	Normal	Uterine Corpus Endometrial Carcinoma	Uterus	Uterus	female
7e503dd3-a77d-461f-8783-e0afef2e6566	TCGA	Normal	Uterine Corpus Endometrial Carcinoma	Uterus	Uterus	female
ff6f4200-7c6e-4781-8e27-042816453d95	TCGA	Normal	Uterine Corpus Endometrial Carcinoma	Uterus	Uterus	female
09175ec3-1677-4728-8e3c-9f01b1aafda9	TCGA	Normal	Uterine Corpus Endometrial Carcinoma	Uterus	Uterus	female
5e23152e-c24b-408c-baaa-cd1969be10e5	TCGA	Normal	Uterine Corpus Endometrial Carcinoma	Uterus	Uterus	female
8c439104-4268-4ce1-adf2-1fdd825d35d3	TCGA	Normal	Uterine Corpus Endometrial Carcinoma	Uterus	Uterus	female
SRR1336682	GTEx	Normal	Normal	Uterus	uterus	female
SRR1387132	GTEx	Normal	Normal	Uterus	uterus	female
SRR1498726	GTEx	Normal	Normal	Uterus	uterus	female
SRR1360280	GTEx	Normal	Normal	Uterus	uterus	female
SRR1475086	GTEx	Normal	Normal	Uterus	uterus	female
SRR1339258	GTEx	Normal	Normal	Uterus	uterus	female
SRR818139	GTEx	Normal	Normal	Uterus	uterus	female
SRR817817	GTEx	Normal	Normal	Uterus	uterus	female
SRR815256	GTEx	Normal	Normal	Uterus	uterus	female
SRR1071737	GTEx	Normal	Normal	Uterus	uterus	female
SRR1363718	GTEx	Normal	Normal	Uterus	uterus	female
SRR1388257	GTEx	Normal	Normal	Uterus	uterus	female
SRR1455038	GTEx	Normal	Normal	Adipose Tissue	subcutaneous adipose tissue	female
SRR1309248	GTEx	Normal	Normal	Adipose Tissue	greater omentum	female
SRR1329027	GTEx	Normal	Normal	Adipose Tissue	greater omentum	male
SRR1377423	GTEx	Normal	Normal	Adipose Tissue	subcutaneous adipose tissue	male
SRR1315165	GTEx	Normal	Normal	Adipose Tissue	greater omentum	male
SRR1398074	GTEx	Normal	Normal	Adipose Tissue	greater omentum	male
SRR1333395	GTEx	Normal	Normal	Adipose Tissue	greater omentum	female
SRR1346773	GTEx	Normal	Normal	Adipose Tissue	subcutaneous adipose tissue	female
SRR1397366	GTEx	Normal	Normal	Adipose Tissue	subcutaneous adipose tissue	female
SRR661108	GTEx	Normal	Normal	Adipose Tissue	subcutaneous adipose tissue	female
SRR665310	GTEx	Normal	Normal	Adipose Tissue	subcutaneous adipose tissue	male
SRR1099096	GTEx	Normal	Normal	Adipose Tissue	subcutaneous adipose tissue	female
SRR810295	GTEx	Normal	Normal	Adipose Tissue	greater omentum	male
SRR1094457	GTEx	Normal	Normal	Adipose Tissue	greater omentum	female
SRR1081209	GTEx	Normal	Normal	Adipose Tissue	greater omentum	female
SRR1323577	GTEx	Normal	Normal	Adipose Tissue	greater omentum	male
SRR1500472	GTEx	Normal	Normal	Adipose Tissue	subcutaneous adipose tissue	female
SRR1433392	GTEx	Normal	Normal	Adipose Tissue	subcutaneous adipose tissue	male
SRR1485830	GTEx	Normal	Normal	Adipose Tissue	greater omentum	male
SRR1404909	GTEx	Normal	Normal	Adipose Tissue	greater omentum	female
SRR1408393	GTEx	Normal	Normal	Adipose Tissue	subcutaneous adipose tissue	male
SRR1414139	GTEx	Normal	Normal	Adipose Tissue	greater omentum	female
SRR1442464	GTEx	Normal	Normal	Adipose Tissue	subcutaneous adipose tissue	male
SRR1360695	GTEx	Normal	Normal	Adipose Tissue	subcutaneous adipose tissue	male
SRR1333330	GTEx	Normal	Normal	Blood	EBV-transformed lymphocyte	male
SRR1356248	GTEx	Normal	Normal	Blood	blood	female
SRR1487089	GTEx	Normal	Normal	Blood	blood	male
SRR1465018	GTEx	Normal	Normal	Blood	blood	male
SRR598172	GTEx	Normal	Normal	Blood	blood	female
SRR601038	GTEx	Normal	Normal	Blood	blood	female
SRR1351166	GTEx	Normal	Normal	Blood	blood	female
SRR1392547	GTEx	Normal	Normal	Blood	blood	male
SRR1341164	GTEx	Normal	Normal	Blood	blood	female
SRR659295	GTEx	Normal	Normal	Blood	blood	female
SRR816945	GTEx	Normal	Normal	Blood	EBV-transformed lymphocyte	female
SRR809259	GTEx	Normal	Normal	Blood	EBV-transformed lymphocyte	female
SRR814679	GTEx	Normal	Normal	Blood	EBV-transformed lymphocyte	female
SRR815637	GTEx	Normal	Normal	Blood	EBV-transformed lymphocyte	male
SRR2164650	GTEx	Normal	Normal	Blood	blood	male
SRR1356397	GTEx	Normal	Normal	Blood	EBV-transformed lymphocyte	male
SRR1091918	GTEx	Normal	Normal	Blood	EBV-transformed lymphocyte	male
SRR1086585	GTEx	Normal	Normal	Blood	EBV-transformed lymphocyte	female
SRR1105369	GTEx	Normal	Normal	Blood	EBV-transformed lymphocyte	male
SRR1400054	GTEx	Normal	Normal	Blood	blood	male
SRR1367432	GTEx	Normal	Normal	Blood	blood	male
SRR1489862	GTEx	Normal	Normal	Blood	EBV-transformed lymphocyte	female
SRR1469169	GTEx	Normal	Normal	Blood	EBV-transformed lymphocyte	female
SRR1379133	GTEx	Normal	Normal	Blood	EBV-transformed lymphocyte	male
SRR1488388	GTEx	Normal	Normal	Blood Vessel	aorta	female
SRR1435982	GTEx	Normal	Normal	Blood Vessel	coronary artery	female
SRR1311833	GTEx	Normal	Normal	Blood Vessel	tibial artery	male
SRR1443161	GTEx	Normal	Normal	Blood Vessel	tibial artery	male
SRR1315739	GTEx	Normal	Normal	Blood Vessel	coronary artery	male
SRR1359803	GTEx	Normal	Normal	Blood Vessel	aorta	female
SRR1486698	GTEx	Normal	Normal	Blood Vessel	tibial artery	male
SRR1337155	GTEx	Normal	Normal	Blood Vessel	tibial artery	female
SRR1384258	GTEx	Normal	Normal	Blood Vessel	aorta	male
SRR1446050	GTEx	Normal	Normal	Blood Vessel	coronary artery	male
SRR1466709	GTEx	Normal	Normal	Blood Vessel	tibial artery	male
SRR1337302	GTEx	Normal	Normal	Blood Vessel	tibial artery	female
SRR1319520	GTEx	Normal	Normal	Blood Vessel	aorta	male
SRR1476863	GTEx	Normal	Normal	Blood Vessel	aorta	female
SRR1351521	GTEx	Normal	Normal	Blood Vessel	coronary artery	female
SRR1465587	GTEx	Normal	Normal	Blood Vessel	aorta	male
SRR1479014	GTEx	Normal	Normal	Blood Vessel	tibial artery	male
SRR1407386	GTEx	Normal	Normal	Blood Vessel	aorta	male
SRR1072948	GTEx	Normal	Normal	Blood Vessel	coronary artery	female
SRR1102443	GTEx	Normal	Normal	Blood Vessel	aorta	female
SRR1395857	GTEx	Normal	Normal	Blood Vessel	coronary artery	male
SRR1380952	GTEx	Normal	Normal	Blood Vessel	aorta	male
SRR656758	GTEx	Normal	Normal	Blood Vessel	tibial artery	male
SRR1081473	GTEx	Normal	Normal	Blood Vessel	coronary artery	female
SRR655301	GTEx	Normal	Normal	Blood Vessel	tibial artery	female
SRR1392835	GTEx	Normal	Normal	Blood Vessel	coronary artery	male
SRR1096149	GTEx	Normal	Normal	Blood Vessel	aorta	female
SRR812625	GTEx	Normal	Normal	Blood Vessel	tibial artery	female
SRR1456114	GTEx	Normal	Normal	Blood Vessel	aorta	female
SRR1102680	GTEx	Normal	Normal	Blood Vessel	coronary artery	male
SRR1403072	GTEx	Normal	Normal	Blood Vessel	coronary artery	female
SRR1498885	GTEx	Normal	Normal	Blood Vessel	tibial artery	female
SRR1384754	GTEx	Normal	Normal	Blood Vessel	coronary artery	female
SRR1397971	GTEx	Normal	Normal	Blood Vessel	aorta	male
SRR1353136	GTEx	Normal	Normal	Blood Vessel	tibial artery	female
SRR1487993	GTEx	Normal	Normal	Blood Vessel	coronary artery	male
SRR811938	GTEx	Normal	Normal	Fallopian Tube	fallopian tube	female
SRR1076584	GTEx	Normal	Normal	Fallopian Tube	fallopian tube	female
SRR1082520	GTEx	Normal	Normal	Fallopian Tube	fallopian tube	female
SRR1101693	GTEx	Normal	Normal	Fallopian Tube	fallopian tube	female
SRR1083776	GTEx	Normal	Normal	Fallopian Tube	fallopian tube	female
SRR1074140	GTEx	Normal	Normal	Fallopian Tube	fallopian tube	female
SRR1071359	GTEx	Normal	Normal	Fallopian Tube	fallopian tube	female
SRR1458358	GTEx	Normal	Normal	Heart	heart left ventricle	female
SRR1310373	GTEx	Normal	Normal	Heart	heart left ventricle	female
SRR1378131	GTEx	Normal	Normal	Heart	atrium auricular region	female
SRR1442648	GTEx	Normal	Normal	Heart	atrium auricular region	male
SRR1455326	GTEx	Normal	Normal	Heart	heart left ventricle	female
SRR1318662	GTEx	Normal	Normal	Heart	atrium auricular region	male
SRR1333414	GTEx	Normal	Normal	Heart	atrium auricular region	female
SRR1430420	GTEx	Normal	Normal	Heart	heart left ventricle	female
SRR808772	GTEx	Normal	Normal	Heart	heart left ventricle	female
SRR1352936	GTEx	Normal	Normal	Heart	heart left ventricle	male
SRR661120	GTEx	Normal	Normal	Heart	heart left ventricle	male
SRR661337	GTEx	Normal	Normal	Heart	heart left ventricle	female
SRR2164847	GTEx	Normal	Normal	Heart	heart left ventricle	male
SRR1321505	GTEx	Normal	Normal	Heart	heart left ventricle	male
SRR1102756	GTEx	Normal	Normal	Heart	atrium auricular region	male
SRR662150	GTEx	Normal	Normal	Heart	heart left ventricle	male
SRR810051	GTEx	Normal	Normal	Heart	atrium auricular region	male
SRR1084892	GTEx	Normal	Normal	Heart	atrium auricular region	female
SRR812649	GTEx	Normal	Normal	Heart	atrium auricular region	female
SRR807727	GTEx	Normal	Normal	Heart	atrium auricular region	male
SRR1088340	GTEx	Normal	Normal	Heart	atrium auricular region	male
SRR1408072	GTEx	Normal	Normal	Heart	atrium auricular region	female
SRR1349433	GTEx	Normal	Normal	Heart	atrium auricular region	female
SRR1400889	GTEx	Normal	Normal	Heart	heart left ventricle	male
SRR1321987	GTEx	Normal	Normal	Muscle	skeletal muscle tissue	male
SRR1347937	GTEx	Normal	Normal	Muscle	skeletal muscle tissue	male
SRR1318839	GTEx	Normal	Normal	Muscle	skeletal muscle tissue	female
SRR1402153	GTEx	Normal	Normal	Muscle	skeletal muscle tissue	female
SRR1377862	GTEx	Normal	Normal	Muscle	skeletal muscle tissue	male
SRR1490037	GTEx	Normal	Normal	Muscle	skeletal muscle tissue	male
SRR627439	GTEx	Normal	Normal	Muscle	skeletal muscle tissue	female
SRR1388873	GTEx	Normal	Normal	Muscle	skeletal muscle tissue	male
SRR1480038	GTEx	Normal	Normal	Muscle	skeletal muscle tissue	male
SRR1402328	GTEx	Normal	Normal	Muscle	skeletal muscle tissue	female
SRR1458220	GTEx	Normal	Normal	Muscle	skeletal muscle tissue	female
SRR1458683	GTEx	Normal	Normal	Muscle	skeletal muscle tissue	female
SRR1322227	GTEx	Normal	Normal	Nerve	tibial nerve	female
SRR1419985	GTEx	Normal	Normal	Nerve	tibial nerve	male
SRR1480200	GTEx	Normal	Normal	Nerve	tibial nerve	male
SRR1457015	GTEx	Normal	Normal	Nerve	tibial nerve	male
SRR612911	GTEx	Normal	Normal	Nerve	tibial nerve	female
SRR612203	GTEx	Normal	Normal	Nerve	tibial nerve	female
SRR820938	GTEx	Normal	Normal	Nerve	tibial nerve	male
SRR1097055	GTEx	Normal	Normal	Nerve	tibial nerve	male
SRR1432049	GTEx	Normal	Normal	Nerve	tibial nerve	female
SRR1326427	GTEx	Normal	Normal	Nerve	tibial nerve	male
SRR1380336	GTEx	Normal	Normal	Nerve	tibial nerve	female
SRR1500360	GTEx	Normal	Normal	Nerve	tibial nerve	female
SRR1336029	GTEx	Normal	Normal	Pituitary	pituitary gland	male
SRR1340241	GTEx	Normal	Normal	Pituitary	pituitary gland	female
SRR1350792	GTEx	Normal	Normal	Pituitary	pituitary gland	male
SRR1435372	GTEx	Normal	Normal	Pituitary	pituitary gland	male
SRR1485042	GTEx	Normal	Normal	Pituitary	pituitary gland	female
SRR1343720	GTEx	Normal	Normal	Pituitary	pituitary gland	female
SRR1445132	GTEx	Normal	Normal	Pituitary	pituitary gland	male
SRR1384713	GTEx	Normal	Normal	Pituitary	pituitary gland	male
SRR1077968	GTEx	Normal	Normal	Pituitary	pituitary gland	female
SRR816517	GTEx	Normal	Normal	Pituitary	pituitary gland	female
SRR1347389	GTEx	Normal	Normal	Pituitary	pituitary gland	male
SRR1430991	GTEx	Normal	Normal	Pituitary	pituitary gland	female
SRR1406135	GTEx	Normal	Normal	Salivary Gland	minor salivary gland	female
SRR1429540	GTEx	Normal	Normal	Salivary Gland	minor salivary gland	female
SRR1469390	GTEx	Normal	Normal	Salivary Gland	minor salivary gland	male
SRR1413307	GTEx	Normal	Normal	Salivary Gland	minor salivary gland	male
SRR1407044	GTEx	Normal	Normal	Salivary Gland	minor salivary gland	male
SRR1469062	GTEx	Normal	Normal	Salivary Gland	minor salivary gland	male
SRR1386927	GTEx	Normal	Normal	Salivary Gland	minor salivary gland	female
SRR1429429	GTEx	Normal	Normal	Salivary Gland	minor salivary gland	female
SRR1444370	GTEx	Normal	Normal	Salivary Gland	minor salivary gland	female
SRR1381185	GTEx	Normal	Normal	Salivary Gland	minor salivary gland	male
SRR1486322	GTEx	Normal	Normal	Salivary Gland	minor salivary gland	male
SRR1405147	GTEx	Normal	Normal	Salivary Gland	minor salivary gland	female
SRR1340782	GTEx	Normal	Normal	Small Intestine	Small Intestine Peyers patch	female
SRR1359587	GTEx	Normal	Normal	Small Intestine	Small Intestine Peyers patch	female
SRR1313664	GTEx	Normal	Normal	Small Intestine	Small Intestine Peyers patch	male
SRR1413119	GTEx	Normal	Normal	Small Intestine	Small Intestine Peyers patch	female
SRR1409772	GTEx	Normal	Normal	Small Intestine	Small Intestine Peyers patch	male
SRR1473611	GTEx	Normal	Normal	Small Intestine	Small Intestine Peyers patch	male
SRR1087680	GTEx	Normal	Normal	Small Intestine	Small Intestine Peyers patch	male
SRR1085378	GTEx	Normal	Normal	Small Intestine	Small Intestine Peyers patch	male
SRR1445170	GTEx	Normal	Normal	Small Intestine	Small Intestine Peyers patch	female
SRR1436262	GTEx	Normal	Normal	Small Intestine	Small Intestine Peyers patch	male
SRR1454225	GTEx	Normal	Normal	Small Intestine	Small Intestine Peyers patch	female
SRR1460095	GTEx	Normal	Normal	Small Intestine	Small Intestine Peyers patch	female
SRR1324062	GTEx	Normal	Normal	Spleen	spleen	male
SRR1378045	GTEx	Normal	Normal	Spleen	spleen	female
SRR1499503	GTEx	Normal	Normal	Spleen	spleen	male
SRR1318732	GTEx	Normal	Normal	Spleen	spleen	female
SRR1074526	GTEx	Normal	Normal	Spleen	spleen	male
SRR1092257	GTEx	Normal	Normal	Spleen	spleen	female
SRR1094073	GTEx	Normal	Normal	Spleen	spleen	female
SRR1085087	GTEx	Normal	Normal	Spleen	spleen	female
SRR1389522	GTEx	Normal	Normal	Spleen	spleen	male
SRR1069400	GTEx	Normal	Normal	Spleen	spleen	male
SRR1415956	GTEx	Normal	Normal	Spleen	spleen	female
SRR1401972	GTEx	Normal	Normal	Spleen	spleen	male
SRR1397030	GTEx	Normal	Normal	Vagina	vagina	female
SRR1334791	GTEx	Normal	Normal	Vagina	vagina	female
SRR1344185	GTEx	Normal	Normal	Vagina	vagina	female
SRR1447172	GTEx	Normal	Normal	Vagina	vagina	female
SRR811403	GTEx	Normal	Normal	Vagina	vagina	female
SRR811675	GTEx	Normal	Normal	Vagina	vagina	female
SRR1318390	GTEx	Normal	Normal	Vagina	vagina	female
SRR1089106	GTEx	Normal	Normal	Vagina	vagina	female
SRR1095599	GTEx	Normal	Normal	Vagina	vagina	female
SRR1487638	GTEx	Normal	Normal	Vagina	vagina	female
SRR1417296	GTEx	Normal	Normal	Vagina	vagina	female
SRR1445920	GTEx	Normal	Normal	Vagina	vagina	female

## Sheet: Supplemental_Table_S3
Supplemental_Table_S3. Summary of cancer and normal control samples from TCGA and GTEx used in this study
project_disease_type	disease_code	TCGA Cancer	TCGA Normal			tissue_origin	GTEx Normal
Adrenocortical Carcinoma	ACC	24	0			Adrenal Gland	12
Bladder Urothelial Carcinoma	BLCA	24	12			Bladder	11
Brain Lower Grade Glioma	LGG	24	0			Brain	156
Breast Invasive Carcinoma	BRCA	24	12			Breast	12
Cervical Squamous Cell Carcinoma and Endocervical Adenocarcinoma	CESC	24	3			Cervix	11
Cholangiocarcinoma	CHOL	24	9			Colorectal	24
Colon Adenocarcinoma	COAD	24	12			Esophagus	36
Esophageal Carcinoma	ESCA	24	11			Kidney	12
Glioblastoma Multiforme	GBM	24	0			Liver	12
Head and Neck Squamous Cell Carcinoma	HNSC	24	12			Lung	12
Kidney Renal Clear Cell Carcinoma	KIRC	24	12			Ovary	12
Kidney Renal Papillary Cell Carcinoma	KIRP	24	12			Pancreas	12
Liver Hepatocellular Carcinoma	LIHC	24	12			Prostate	12
Lung Adenocarcinoma	LUAD	24	12			Skin	36
Lung Squamous Cell Carcinoma	LUSC	24	12			Stomach	12
Lymphoid Neoplasm Diffuse Large B-cell Lymphoma	DLBC	24	0			Testis	12
Mesothelioma	MESO	24	0			Thyroid	12
Ovarian Serous Cystadenocarcinoma	OV	24	0			Uterus	12
Pancreatic Adenocarcinoma	PAAD	24	4			Adipose Tissue	24
Pheochromocytoma and Paraganglioma	PCPG	24	3			Blood	24
Prostate Adenocarcinoma	PRAD	24	12			Blood Vessel	36
Rectum Adenocarcinoma	READ	24	6			Fallopian Tube	7
Sarcoma	SARC	24	0			Heart	24
Skin Cutaneous Melanoma_primary	SKCM	24	1			Muscle	12
Skin Cutaneous Melanoma_metastatic	SKCM_m	24	0			Nerve	12
Stomach Adenocarcinoma	STAD	24	12			Pituitary	12
Testicular Germ Cell Tumors	TGCT	24	0			Salivary Gland	12
Thymoma	THYM	24	2			Small Intestine	12
Thyroid Carcinoma	THCA	24	12			Spleen	12
Uterine Carcinosarcoma	UCS	24	0			Vagina	12
Uterine Corpus Endometrial Carcinoma	UCEC	24	13
Uveal Melanoma	UVM	24	0

## Sheet: Supplemental_Table_S4
Supplemental_Table_S4. Properties of the 5,923 CLTs (CLTs expressed in more than one cancer type are listed in separete rows for each cancer type)
transcript	project_disease_type	tissue_origin	tumourbenign	upperQuartile	maxmedianbenign	maxRespectiveBenign	exonNumber	gene_name	repeatIDs	seqnames	start	end	strand	likely_strand	geneID	gene_type	transcript_type
trans001cfff345c5d253	Skin Cutaneous Melanoma	Skin	Primary	1.57317	0	0	4	NA	LTR/ERV1|MER34|21|15236028|15236504;LTR/ERVL-MaLR|MSTB|21|15239165|15239585	chr21	15236360	15239526	*	*	NA	NA	NA
trans001cfff345c5d253	Uveal Melanoma	Eye	Primary	3.69055	0	NA	4	NA	LTR/ERV1|MER34|21|15236028|15236504;LTR/ERVL-MaLR|MSTB|21|15239165|15239585	chr21	15236360	15239526	*	*	NA	NA	NA
trans002340a0c8909a19	Esophageal Carcinoma	Esophagus	Primary	0.623708	0	0.140323	2	SLC3A2	LTR/ERVK|LTR5B|11|62860432|62861080	chr11	62860831	62861660	*	*	ENSG00000168003.16	protein_coding	protein_coding
trans1be1e1bc39e0256c	Adrenocortical Carcinoma	Adrenal Gland	Primary	2.42324	0.0518634	0.0321752	23	Y_RNA	LTR/ERV1|LTR65|10|32057510|32058000	chr10	32015148	32058047	-	-	ENSG00000206660.1	misc_RNA	misc_RNA
trans00527554273a6451	Lung Squamous Cell Carcinoma	Lung	Primary	0.951668	0.262167	0	4	DLEU1-AS1	LTR/ERVL|LTR33|13|50389866|50390340	chr13	50390196	50589520	*	*	ENSG00000229323.1	lincRNA	lincRNA
transe9b9629c9adf3947	Testicular Germ Cell Tumors	Testis	Primary	5.33972	0.0133875	0.0441553	2	A2ML1-AS1	LTR/ERV1|HERVH-int~LTR7|12|8804879|8810577	chr12	8805276	8808362	*	+	ENSG00000256661.1	antisense	antisense
trans4e71b17c9bb844cc	Thymoma	Thymus	Primary	879.263	26.7214	46.9595	2	CCL25	LTR/ERVL-MaLR|MLT1K|19|8057644|8058065	chr19	8057739	8062662	*	*	ENSG00000131142.13	protein_coding	protein_coding
trans01bca0fa1797fe1e	Testicular Germ Cell Tumors	Testis	Primary	5.98645	0	0.151343	1	RP11-572M11.4	LTR/ERVK|HERVK-int~LTR5_Hs|3|113024277|113033435	chr3	113026608	113027828	*	*	ENSG00000240057.5	antisense	antisense
trans0299a7992ad67b6b	Esophageal Carcinoma	Esophagus	Primary	1.47453	0.116011	0.296697	3	RP11-731D1.1	LTR/ERVL-MaLR|MLT1F2|4|151264457|151264567	chr4	151155735	151265551	*	*	ENSG00000249012.2	unprocessed_pseudogene	unprocessed_pseudogene
trans02e4174eed1c40ff	Testicular Germ Cell Tumors	Testis	Primary	52.1991	0	0.132395	3	NA	LTR/ERV1|HERVH-int~LTR7|6|94553919|94559610	chr6	94553966	94559596	*	*	NA	NA	NA
transe3d671b113317f22	Esophageal Carcinoma	Esophagus	Primary	1.20589	0.0227678	0.19221	2	ABTB2	LTR|EUTREP8|11|34280503|34280632;LTR/ERVL-MaLR|MLT1A0|11|34281975|34282286	chr11	34273892	34282512	*	+	ENSG00000166016.5	protein_coding	protein_coding
trans49fae8cab1376dbb	Esophageal Carcinoma	Esophagus	Primary	69.2793	0	0.359846	2	NA	LTR/ERV1|HERVH-int~LTR7Y|X|4540474|4546320	chrX	4541538	4545907	*	*	NA	NA	NA
trans4e4b3f61796e53e1	Prostate Adenocarcinoma	Prostate	Primary	38.7396	0.723059	1.43796	1	AC006033.22	LTR/ERVL|LTR33|7|38313061|38313454	chr7	38311434	38313681	*	*	ENSG00000231916.1	processed_pseudogene	processed_pseudogene
transfb1357c2a41f8415	Lymphoid Neoplasm Diffuse Large B-cell Lymphoma	Lymph Nodes	Primary	10.2926	0.220956	0.164086	2	AC006509.4	LTR/ERV1|MER61E|2|47695915|47696011;LTR/ERV1|LTR49|2|47696085|47696404;LTR/ERVL-MaLR|MLT1A|2|47709160|47709322;LTR/ERVL-MaLR|MLT1A|2|47709604|47709880	chr2	47695871	47709833	*	+	ENSG00000224443.1	processed_pseudogene	processed_pseudogene
trans043bc6a41824c84a	Skin Cutaneous Melanoma	Skin	Primary	32.0665	0.514044	0	2	RP11-599J14.2	LTR/ERV1|HERVE-int|12|9406304|9406453;LTR/ERV1|HERVE-int|12|9407305|9407906	chr12	9406326	9407454	*	*	ENSG00000256673.1	unprocessed_pseudogene	unprocessed_pseudogene
transda2b1ab001d9cd1f	Mesothelioma	Pleura	Primary	504.774	24.1615	NA	2	PMS2P10	LTR/ERVL-MaLR|MSTA|7|75292723|75293109	chr7	75292803	75296128	*	*	ENSG00000276840.1	unprocessed_pseudogene	unprocessed_pseudogene
trans043bc6a41824c84a	Uveal Melanoma	Eye	Primary	6.40579	0.514044	NA	2	RP11-599J14.2	LTR/ERV1|HERVE-int|12|9406304|9406453;LTR/ERV1|HERVE-int|12|9407305|9407906	chr12	9406326	9407454	*	*	ENSG00000256673.1	unprocessed_pseudogene	unprocessed_pseudogene
trans950d281b6b8a110b	Esophageal Carcinoma	Esophagus	Primary	53.0322	0.0243041	0.0720087	2	NA	LTR/ERV1|HERVH-int~LTR7Y|X|4540474|4546320	chrX	4540920	4542591	*	*	NA	NA	NA
transfb1357c2a41f8415	Testicular Germ Cell Tumors	Testis	Primary	7.97032	0.220956	0.0747536	2	AC006509.4	LTR/ERV1|MER61E|2|47695915|47696011;LTR/ERV1|LTR49|2|47696085|47696404;LTR/ERVL-MaLR|MLT1A|2|47709160|47709322;LTR/ERVL-MaLR|MLT1A|2|47709604|47709880	chr2	47695871	47709833	*	+	ENSG00000224443.1	processed_pseudogene	processed_pseudogene
trans15360418e4747c5a	Testicular Germ Cell Tumors	Testis	Primary	63.2137	0.387678	0.841503	2	RP11-320N7.2	LTR/ERV1|HERVH-int~LTR7|12|4018541|4023694	chr12	4019116	4023311	*	*	ENSG00000256969.1	lincRNA	lincRNA
trans04f4d94443272245	Esophageal Carcinoma	Esophagus	Primary	4.48135	0.108799	1.40411	1	SSH2	LTR/ERV1|LTR8|17|29782521|29782581	chr17	29782104	29782582	*	*	ENSG00000141298.17	protein_coding	protein_coding
trans05691997201f9e76	Head and Neck Squamous Cell Carcinoma	Head and Neck	Primary	11.9321	0	0.275907	3	NA	LTR/ERV1|HERVH-int~LTR7Y|1|68386004|68391994	chr1	68386401	68387391	*	*	NA	NA	NA
trans84c888a7764ec988	Kidney Renal Papillary Cell Carcinoma	Kidney	Primary	87.1621	1.57096	12.9999	2	UGT2B11	LTR/ERV1|Harlequin-int~LTR2B|4|69050860|69051710	chr4	69051230	69064044	*	*	ENSG00000213759.8	protein_coding	protein_coding
transdc91a198f74994c8	Head and Neck Squamous Cell Carcinoma	Head and Neck	Primary	52.8216	0.113217	1.69919	2	NA	LTR/ERV1|HERVH-int~LTR7Y|1|68386004|68391994	chr1	68386251	68391833	*	*	NA	NA	NA
trans060ea13699d23e57	Stomach Adenocarcinoma	Stomach	Primary	1.96964	0.0820019	0.445243	2	NA	LTR/ERV1|LTR44|7|150192703|150193178	chr7	150192369	150194014	*	*	NA	NA	NA
trans06968d42c81fb297	Prostate Adenocarcinoma	Prostate	Primary	10.6875	0.158957	1.31039	2	ABCC4	LTR/ERVL-MaLR|THE1B|13|95273923|95274128	chr13	95273904	95278127	*	*	ENSG00000125257.13	protein_coding	protein_coding
trans0702a7bcadd1d9b6	Testicular Germ Cell Tumors	Testis	Primary	41.2195	0.0171929	0.16499	2	LIM2	LTR/ERVL|MER21C|19|51380841|51381028	chr19	51379910	51380857	-	-	ENSG00000105370.7	protein_coding	protein_coding
trans070f3cc3002f16e9	Kidney Renal Papillary Cell Carcinoma	Kidney	Primary	10.7698	0.69938	1.54531	2	RP11-149I23.3	LTR/ERV1|MER57B2|10|89283042|89283439;LTR/ERVL-MaLR|MLT1J2-int|10|89291441|89292169	chr10	89283312	89292124	*	*	ENSG00000232110.7	antisense	antisense
trans0722dc43d6a36aa8	Ovarian Serous Cystadenocarcinoma	Ovary	Primary	1.11343	0	0	2	NA	LTR/ERV1|HERVH-int~LTR7C|2|41377833|41385713	chr2	41380073	41391414	*	*	NA	NA	NA
transfd7f95c69c1b55ab	Testicular Germ Cell Tumors	Testis	Primary	89.0498	1.79122	2.812	4	RP11-257K9.8	LTR/ERV1|MER110-int|6|73226711|73226755	chr6	73223547	73226790	-	-	ENSG00000243501.5	protein_coding	nonsense_mediated_decay
trans5b6e0366fd6ce5d5	Kidney Renal Papillary Cell Carcinoma	Kidney	Primary	77.2573	1.39724	10.4118	3	UGT2B11	LTR/ERV1|Harlequin-int~LTR2B|4|69050860|69051710;LTR/ERV1|LTR76|4|69064124|69064798	chr4	69051234	69065996	*	*	ENSG00000213759.8	protein_coding	protein_coding
trans07c5a0879fbc4fc3	Prostate Adenocarcinoma	Prostate	Primary	2.33192	0	0	2	NA	LTR/ERVK|LTR5_Hs|1|156179223|156180190;LTR/ERVK|LTR5_Hs|1|156181461|156182421	chr1	156179581	156182023	*	*	NA	NA	NA
trans2ddb78f6a825203b	Bladder Urothelial Carcinoma	Bladder	Primary	134.722	4.73816	37.499	3	UCA1	LTR/ERV1|HERVH-int~LTR7C|19|15828738|15834726;LTR/ERV1|HERV30-int|19|15834956|15835435;LTR/ERV1|LTR7C|19|15835691|15836170	chr19	15829316	15836778	+	+	ENSG00000214049.6	processed_transcript	lincRNA
trans07daeb47dab32ff5	Mesothelioma	Pleura	Primary	2.53196	0.0595077	NA	1	RP11-497K15.1	LTR/ERV1|MER57B2|9|87423024|87423375	chr9	87422568	87424132	*	*	ENSG00000228373.2	processed_pseudogene	processed_pseudogene
trans07e163debf5160de	Testicular Germ Cell Tumors	Testis	Primary	23.1056	0	0	2	NA	LTR/ERV1|LTR7|X|114466672|114467121;LTR/ERV1|HERVH-int~LTR7|X|114467791|114472531	chrX	114466670	114472477	*	*	NA	NA	NA
trans0899b28c6024951e	Esophageal Carcinoma	Esophagus	Primary	7.5206	0.0370853	0.110597	2	NA	LTR/ERV1|HERVH-int~LTR7Y|1|68386004|68391994	chr1	68389781	68390926	*	*	NA	NA	NA
trans93c8820e75f1e91f	Head and Neck Squamous Cell Carcinoma	Head and Neck	Primary	41.0247	0.0590911	0.00913857	2	PDLIM5	LTR/ERVL-MaLR|MLT1A1|4|94506338|94506678;LTR/ERVL|MLT2B3|4|94506690|94507288;LTR/ERVL-MaLR|MLT1A1-int|4|94507289|94507511;LTR/ERVL|MLT2A1|4|94509559|94509995	chr4	94506447	94665481	*	*	ENSG00000163110.14	protein_coding	protein_coding
trans08adba3b08b55d88	Testicular Germ Cell Tumors	Testis	Primary	20.2472	0	0	2	NA	LTR/ERV1|HERVH-int~LTR7Y|19|5548576|5552763;LTR/ERV1|LTR7Y|19|5552772|5553212	chr19	5548710	5553134	*	*	NA	NA	NA
trans09c4d0a7adf9b26e	Bladder Urothelial Carcinoma	Bladder	Primary	2.83698	0.0392652	0.100177	5	NA	LTR/ERVL|LTR16D2|16|52297410|52297700;LTR/ERVL-MaLR|MLT1A|16|52356191|52356640	chr16	52296538	52356389	*	*	NA	NA	NA
transb89c2c5a90b057a2	Lymphoid Neoplasm Diffuse Large B-cell Lymphoma	Lymph Nodes	Primary	124.66	5.01918	0.69231	4	XRCC6	LTR/ERVL|LTR50|22|41656680|41656850	chr22	41656508	41664040	+	+	ENSG00000196419.12	protein_coding	protein_coding
trans11852e751b0774f7	Mesothelioma	Pleura	Primary	251.089	14.8999	NA	3	PMS2P10	LTR/ERVL-MaLR|MSTA|7|75292723|75293109;LTR/ERV1|MER66-int|7|75293110|75293132	chr7	75292763	75303796	*	*	ENSG00000276840.1	unprocessed_pseudogene	unprocessed_pseudogene
trans0a7566bd483736bd	Esophageal Carcinoma	Esophagus	Primary	1.1818	0	0.12593	2	DIAPH3	LTR/ERVL-MaLR|MLT1F|13|59762359|59762505	chr13	59757652	59762723	*	*	ENSG00000139734.17	protein_coding	protein_coding
trans0a7566bd483736bd	Stomach Adenocarcinoma	Stomach	Primary	0.653493	0	0.0312332	2	DIAPH3	LTR/ERVL-MaLR|MLT1F|13|59762359|59762505	chr13	59757652	59762723	*	*	ENSG00000139734.17	protein_coding	protein_coding
trans0aec9079e249bed8	Testicular Germ Cell Tumors	Testis	Primary	56.5926	0	0.233733	1	AC007326.1	LTR/ERVK|HERVK-int~LTR5_Hs|22|18939648|18947848	chr22	18946350	18947769	*	+	ENSG00000279560.1	protein_coding	protein_coding
trans0b3f1846e92dc0af	Uveal Melanoma	Eye	Primary	2.95926	0.0982066	NA	2	NA	LTR/ERV1|LTR12E|21|9663370|9664618	chr21	9663590	9665843	*	*	NA	NA	NA
transf363848758f1b31f	Testicular Germ Cell Tumors	Testis	Primary	73.8935	2.08215	0.0219064	4	RP11-320N7.2	LTR/ERV1|HERVH-int~LTR7|12|4018541|4023694	chr12	4012767	4023654	*	*	ENSG00000256969.1	lincRNA	lincRNA
transec20a8600e3566a1	Kidney Renal Papillary Cell Carcinoma	Kidney	Primary	229.637	14.4744	33.3077	6	C1QTNF3-AMACR	LTR/ERVL|LTR33A|5|33986535|33986963;LTR/ERVL-MaLR|MLT1L|5|33988059|33988546	chr5	33984987	34007994	-	-	ENSG00000273294.1	protein_coding	nonsense_mediated_decay
trans0bca9fdd57248f7f	Uterine Carcinosarcoma	Uterus	Primary	8.60888	2.77057	0	3	DSCR8	LTR/ERV1|LTR9|21|38121187|38121602	chr21	38121409	38156510	*	*	ENSG00000198054.11	protein_coding	protein_coding
trans3713af040f04549d	Esophageal Carcinoma	Esophagus	Primary	313.582	23.722	73.2498	7	VDAC2	LTR/ERVL-MaLR|MLT1E3|10|75336538|75337041	chr10	75229689	75337381	*	*	ENSG00000165637.13	protein_coding	protein_coding
trans0be31212a111d3c8	Testicular Germ Cell Tumors	Testis	Primary	9.64025	0	0	2	NA	LTR/ERVK|LTR5_Hs|22|18938674|18939641;LTR/ERVK|HERVK-int~LTR5_Hs|22|18939648|18947848	chr22	18939516	18945093	*	*	NA	NA	NA
trans0c189a47b456b749	Testicular Germ Cell Tumors	Testis	Primary	3.41718	0	0	3	NA	LTR/ERV1|HERVH-int~LTR7|11|68625994|68632796;LTR/ERV1|HERVH-int~LTR7|11|68633778|68639439	chr11	68626547	68636345	*	*	NA	NA	NA
transdc91a198f74994c8	Esophageal Carcinoma	Esophagus	Primary	35.3083	0.113217	0.941693	2	NA	LTR/ERV1|HERVH-int~LTR7Y|1|68386004|68391994	chr1	68386251	68391833	*	*	NA	NA	NA
trans0d8e0f47d68630f9	Testicular Germ Cell Tumors	Testis	Primary	6.13776	0.100238	0.184186	3	RP11-146I2.1	LTR/ERVL-MaLR|MLT1C|6|14977024|14977372	chr6	14976696	15009018	-	-	ENSG00000234261.3	lincRNA	lincRNA
trans0e93cf7c9a6c531b	Testicular Germ Cell Tumors	Testis	Primary	119.79	0	0.210129	2	NA	LTR/ERV1|HERVH-int~LTR7|15|96871835|96877666	chr15	96871878	96877544	*	*	NA	NA	NA
transeef143afcebe5a7d	Uveal Melanoma	Eye	Primary	45.1761	0.730765	NA	2	CTD-2380F24.1	LTR/ERVL-MaLR|MLT1J|16|19761764|19762277	chr16	19761820	19762775	*	*	ENSG00000261195.1	antisense	antisense
trans6570adb04cce5489	Testicular Germ Cell Tumors	Testis	Primary	24.2424	0.0963239	0.349674	3	AC007326.1	LTR/ERVK|HERVK-int~LTR5_Hs|22|18939648|18947848	chr22	18939671	18946936	*	+	ENSG00000279560.1	protein_coding	protein_coding
trans0effe7a5e81e0419	Esophageal Carcinoma	Esophagus	Primary	1.55694	0.0285021	0.0516825	2	MIR4652	LTR/ERVL-MaLR|MLT1D|7|93680520|93680977	chr7	93680315	93742139	*	*	ENSG00000265423.1	miRNA	miRNA
trans0effe7a5e81e0419	Lung Squamous Cell Carcinoma	Lung	Primary	0.693246	0.0285021	0.0525711	2	MIR4652	LTR/ERVL-MaLR|MLT1D|7|93680520|93680977	chr7	93680315	93742139	*	*	ENSG00000265423.1	miRNA	miRNA
transab022439db95634c	Testicular Germ Cell Tumors	Testis	Primary	40.9004	0.51655	0.341101	2	RP11-63A11.1	LTR/ERV1|HERV17-int~LTR17|4|42285437|42292896	chr4	42285824	42292625	*	*	ENSG00000250781.1	antisense	antisense
trans9a45595f68ecabf1	Testicular Germ Cell Tumors	Testis	Primary	47.8506	0.935913	2.70645	3	PCAT14	LTR/ERVK|HERVK-int~LTR5_Hs|22|23536062|23537205;LTR/ERVK|HERVK-int~LTR5B|22|23537740|23546004;LTR/ERVK|HERVK-int|22|23546306|23546576;LTR/ERVK|LTR5B|22|23546583|23546900;LTR/ERVK|MER11A|22|23546901|23547896	chr22	23536600	23547797	*	*	ENSG00000280623.1	lincRNA	lincRNA
trans1056b86ce2f3d853	Kidney Renal Papillary Cell Carcinoma	Kidney	Primary	1.47967	0	0.25477	5	RP11-3B12.2	LTR/ERVL-MaLR|MLT1J2|7|125431293|125431669	chr7	125347122	125466475	*	*	ENSG00000237764.2	lincRNA	lincRNA
trans112013303ca0670e	Glioblastoma Multiforme	Brain	Primary	8.31308	0	0	3	NA	LTR/ERV1|MER41B~MER57-int|2|103479700|103481010	chr2	103449849	103480518	*	*	NA	NA	NA
trans8c8f81cc648a3ebb	Testicular Germ Cell Tumors	Testis	Primary	8.18404	0.0267313	0.0582702	2	AC007326.1	LTR/ERVK|LTR5_Hs|22|18938674|18939641;LTR/ERVK|HERVK-int~LTR5_Hs|22|18939648|18947848	chr22	18938980	18947151	*	+	ENSG00000279560.1	protein_coding	protein_coding
transbfe2feec2d023ce8	Testicular Germ Cell Tumors	Testis	Primary	9.24278	0.0149482	0.156606	2	AC007326.1	LTR/ERVK|HERVK-int~LTR5_Hs|22|18939648|18947848	chr22	18943827	18947663	*	+	ENSG00000279560.1	protein_coding	protein_coding
trans03069b8ceb94c604	Testicular Germ Cell Tumors	Testis	Primary	30.2868	0.0277242	0.0230962	3	AC007381.1	LTR/ERV1|LTR7|2|60417435|60417833;LTR/ERV1|HERVH-int~LTR7Y|2|60418526|60422485;LTR/ERVL-MaLR|MLT1F1|2|60424110|60424655;LTR/ERV1|MER4A1|2|60424995|60425499	chr2	60417719	60425543	*	+	ENSG00000276812.1	miRNA	miRNA
trans4b94d1dc6bdfa52e	Esophageal Carcinoma	Esophagus	Primary	106.784	5.52897	0.905444	3	S100A7	LTR/ERVL-MaLR|THE1A|1|153506015|153506369	chr1	153457609	153506160	-	-	ENSG00000143556.8	protein_coding	protein_coding
trans749199973bd5a6d9	Uveal Melanoma	Eye	Primary	107.139	5.59762	NA	9	TBC1D16	LTR/ERVL-MaLR|MLT1H|17|79938643|79939068	chr17	79937085	79952005	-	-	ENSG00000167291.15	protein_coding	protein_coding
trans1721821eecb0bc9d	Prostate Adenocarcinoma	Prostate	Primary	1.32011	0	0.149116	3	AC011523.2	LTR/ERVL|LTR40a|19|50850470|50851070	chr19	50844623	50851053	*	-	ENSG00000267968.1	antisense	antisense
trans16357572534e1e0f	Breast Invasive Carcinoma	Breast	Primary	2.03284	0.633406	0.37062	1	POTEKP	LTR/ERVL-MaLR|THE1D|2|131621039|131621374	chr2	131618871	131624029	*	*	ENSG00000204434.5	unprocessed_pseudogene	unprocessed_pseudogene
trans14c29bdecf459c8c	Head and Neck Squamous Cell Carcinoma	Head and Neck	Primary	5.8884	0.606813	0.659188	1	NA	LTR/ERV1|MER41B|1|21389812|21390167	chr1	21389822	21390209	*	*	NA	NA	NA
trans6f2b5a01b7e99f36	Skin Cutaneous Melanoma	Skin	Primary	947.725	116.037	7.63817	6	MIA-RAB4B	LTR/ERVL-MaLR|MLT1F2|19|40771712|40771932	chr19	40771913	40777440	+	+	ENSG00000268975.1	protein_coding	nonsense_mediated_decay
trans1500f4d3a8ae3fc5	Testicular Germ Cell Tumors	Testis	Primary	14.25	0	0	1	NA	LTR/ERV1|HERVH-int~LTR7|4|179166476|179170568	chr4	179166666	179166939	*	*	NA	NA	NA
trans47e5ddcd89fac06e	Rectum Adenocarcinoma	Colorectal	Primary	89.4086	9.96386	13.1318	5	CCL20	LTR/ERV1|LTR2C|2|227805691|227806180	chr2	227805946	227817535	+	+	ENSG00000115009.11	protein_coding	protein_coding
trans008b4b198d3e15ff	Ovarian Serous Cystadenocarcinoma	Ovary	Primary	91.318	4.57798	0	2	NA	LTR/ERV1|HERVH-int~LTR7|3|112418412|112423365	chr3	112418466	112422797	*	*	NA	NA	NA
trans57ed8012a5332f75	Mesothelioma	Pleura	Primary	99.5845	5.42743	NA	17	MSLN	LTR/ERVL|MER54B|16|760973|761306	chr16	760799	769198	+	+	ENSG00000102854.14	protein_coding	protein_coding
trans6cc9ffadaafba1a4	Kidney Renal Clear Cell Carcinoma	Kidney	Primary	33.2386	0.28956	0.160002	4	RP11-728F11.3	LTR/Gypsy|MamGypLTR3a|11|117819626|117820111	chr11	117815276	117830186	-	-	ENSG00000254844.4	antisense	antisense
trans73585f74d3ffe1aa	Mesothelioma	Pleura	Primary	194.66	15.4852	NA	9	SLC12A8	LTR/ERVL-MaLR|THE1B|3|125123515|125123811	chr3	125082638	125123599	-	-	ENSG00000221955.10	protein_coding	protein_coding
trans154c11854eac8661	Uveal Melanoma	Eye	Primary	21.0801	3.05464	NA	4	LINC01531	LTR/ERVL?|LTR89|19|35409114|35409182;LTR/ERVL-MaLR|MLT1K|19|35418934|35419418	chr19	35408930	35419380	+	+	ENSG00000205786.8	lincRNA	lincRNA
trans04b631de9ba0dcaa	Stomach Adenocarcinoma	Stomach	Primary	37.4271	0.643205	11.8204	2	NA	LTR/ERV1|HERVH-int~LTR7Y|X|4540474|4546320	chrX	4541446	4542986	*	*	NA	NA	NA
trans15501be39604c999	Testicular Germ Cell Tumors	Testis	Primary	40.1859	0.191595	0.446814	4	AC226119.5	LTR/ERVL|MLT2A1|4|3921511|3921609;LTR/ERV1|HERVH-int~LTR7|4|3927446|3933080	chr4	3921583	3933039	-	-	ENSG00000253917.4	processed_transcript	processed_transcript
trans156172bed953815e	Testicular Germ Cell Tumors	Testis	Primary	26.5288	0	0.0252999	2	NA	LTR/ERV1|HERVH-int~LTR7|19|53832340|53837348	chr19	53832297	53833833	*	*	NA	NA	NA
trans4569d8bc812d5598	Rectum Adenocarcinoma	Colorectal	Primary	86.6017	9.94213	16.4635	5	CCL20	LTR/ERV1|LTR2C|2|227805691|227806180	chr2	227805946	227817535	+	+	ENSG00000115009.11	protein_coding	protein_coding
trans160434974c016308	Testicular Germ Cell Tumors	Testis	Primary	4.8402	0.0149943	0.0190199	1	NA	LTR/ERV1|HERVH-int~LTR7|7|24396245|24401985	chr7	24399773	24401433	*	*	NA	NA	NA
trans3713af040f04549d	Ovarian Serous Cystadenocarcinoma	Ovary	Primary	250.773	23.722	14.1852	7	VDAC2	LTR/ERVL-MaLR|MLT1E3|10|75336538|75337041	chr10	75229689	75337381	*	*	ENSG00000165637.13	protein_coding	protein_coding
trans0ea40a5d53f5ddb7	Mesothelioma	Pleura	Primary	1.07189	0.0637585	NA	5	AC067959.1	LTR/ERVL-MaLR|MLT1A|2|21799156|21799555	chr2	21650739	21808079	+	+	ENSG00000233005.1	lincRNA	lincRNA
transd8ac3ff88a9cb87a	Uveal Melanoma	Eye	Primary	38.4061	0.834203	NA	3	IQCK	LTR/ERV1|MER41A|16|19760682|19761227;LTR/ERVL-MaLR|MLT1C|16|19761228|19761302;LTR/ERVL|LTR33|16|19761312|19761476;LTR/ERVL-MaLR|MLT1J|16|19761764|19762277	chr16	19760762	19766308	-	-	ENSG00000174628.16	protein_coding	protein_coding
trans9465c0d657ba1430	Testicular Germ Cell Tumors	Testis	Primary	32.0968	0.401818	0.535161	3	ATP12A	LTR/Gypsy?|LTR85a|13|24711832|24711972	chr13	24710789	24712372	+	+	ENSG00000075673.11	protein_coding	protein_coding
transb9459c9655a2449e	Brain Lower Grade Glioma	Brain	Primary	84.267	4.91606	9.4129	16	PHYHIPL	LTR/ERV1|MER39B|10|59173295|59173996;LTR/Gypsy|LTR81B|10|59174065|59174647;LTR?|MamRep605|10|59174957|59175194	chr10	59173963	59362569	*	*	ENSG00000165443.11	protein_coding	protein_coding
trans167a661d77a601e4	Lung Squamous Cell Carcinoma	Lung	Primary	1.9612	0.0550783	0.0426919	2	NA	LTR/ERVL-MaLR|THE1D|3|115370402|115370779	chr3	115317901	115370723	*	*	NA	NA	NA
trans16f77bf6b85adf65	Prostate Adenocarcinoma	Prostate	Primary	15.8457	0	0.293738	2	PCAT14	LTR/ERVK|HERVK-int~LTR5_Hs|22|23536062|23537205;LTR/ERVK|HERVK-int~LTR5B|22|23537740|23546004	chr22	23536168	23538078	*	*	ENSG00000280623.1	lincRNA	lincRNA
trans7247aa1662b3eb91	Uveal Melanoma	Eye	Primary	31.0357	0.394068	NA	2	RGS20	LTR/ERVL-MaLR|MLT1C2|8|53913412|53913861	chr8	53880027	53913842	*	*	ENSG00000147509.13	protein_coding	protein_coding
trans1af5e150cb2a3166	Testicular Germ Cell Tumors	Testis	Primary	26.7414	0.209559	0.220984	2	NA	LTR/ERV1|HERVH-int|2|71162044|71164534	chr2	71161307	71162066	*	*	NA	NA	NA
transa6ee6b2e20444e8f	Skin Cutaneous Melanoma	Skin	Primary	66.1101	3.30234	2.03438	2	NA	LTR/ERV1|MER39|1|235872320|235872648	chr1	235872320	235883721	*	*	NA	NA	NA
trans4b200bce0001b752	Mesothelioma	Pleura	Primary	163.151	13.8977	NA	4	UPK3B	LTR/ERVL-MaLR|MSTA|7|76527548|76527931	chr7	76513953	76532728	+	+	ENSG00000243566.6	protein_coding	protein_coding
transeba34621342878ac	Kidney Renal Papillary Cell Carcinoma	Kidney	Primary	82.5931	5.04724	21.4237	3	UGT2B11	LTR/ERV1|Harlequin-int~LTR2B|4|69050860|69051710;LTR/ERV1|LTR76|4|69064124|69064798	chr4	69051332	69065998	*	*	ENSG00000213759.8	protein_coding	protein_coding
trans16f77bf6b85adf65	Testicular Germ Cell Tumors	Testis	Primary	3.42982	0	0.347063	2	PCAT14	LTR/ERVK|HERVK-int~LTR5_Hs|22|23536062|23537205;LTR/ERVK|HERVK-int~LTR5B|22|23537740|23546004	chr22	23536168	23538078	*	*	ENSG00000280623.1	lincRNA	lincRNA
trans7bb3eb9f3fa74df0	Testicular Germ Cell Tumors	Testis	Primary	86.0116	5.44108	9.301	3	NLRP2	LTR/ERVL-MaLR|MLT1D|19|54993827|54994134	chr19	54993767	55001135	+	+	ENSG00000022556.15	protein_coding	protein_coding
trans6719a66c80455eac	Kidney Renal Papillary Cell Carcinoma	Kidney	Primary	42.4541	1.37357	6.14736	6	RP11-3B12.2	LTR/ERVL-MaLR|MLT1J2|7|125431293|125431669	chr7	125347121	125466737	+	+	ENSG00000237764.2	lincRNA	lincRNA
transbe8aec08a2cc9cba	Lung Squamous Cell Carcinoma	Lung	Primary	31.6463	0.529235	1.89399	4	U8	LTR/ERVL-MaLR|MSTA-int|10|5016141|5018153	chr10	5001556	5018070	-	-	ENSG00000239148.1	snoRNA	snoRNA
transb89c2c5a90b057a2	Testicular Germ Cell Tumors	Testis	Primary	81.2714	5.01918	3.84916	4	XRCC6	LTR/ERVL|LTR50|22|41656680|41656850	chr22	41656508	41664040	+	+	ENSG00000196419.12	protein_coding	protein_coding
trans3c9f3dd3449fced9	Esophageal Carcinoma	Esophagus	Primary	1.31724	0.0560193	0.147577	1	AC068491.2	LTR/ERVL|MER21A|2|111267604|111268148;LTR/ERVL|MER21A|2|111268644|111269006	chr2	111263838	111271032	*	*	ENSG00000229118.1	lincRNA	lincRNA
trans9c8406864f42691a	Testicular Germ Cell Tumors	Testis	Primary	27.3898	0.237746	0.497004	3	ACOT13	LTR/ERV1|MER4-int~MER4A1|6|24669089|24670946;LTR/ERVL-MaLR|MSTB|6|24686326|24686537	chr6	24669135	24686485	*	*	ENSG00000112304.10	protein_coding	protein_coding
trans4569d8bc812d5598	Esophageal Carcinoma	Esophagus	Primary	78.7409	9.94213	3.51777	5	CCL20	LTR/ERV1|LTR2C|2|227805691|227806180	chr2	227805946	227817535	+	+	ENSG00000115009.11	protein_coding	protein_coding
trans62fce9061ceac841	Head and Neck Squamous Cell Carcinoma	Head and Neck	Primary	23.8808	0	0.710817	2	NA	LTR/ERV1|HERVH-int~LTR7Y|1|68386004|68391994	chr1	68386990	68387312	*	*	NA	NA	NA
trans0637729723453729	Esophageal Carcinoma	Esophagus	Primary	23.7685	0.143133	0.965585	2	YWHAZ	LTR/ERV1|MER34B-int|8|100919659|100920019	chr8	100919656	100920205	*	*	ENSG00000164924.17	protein_coding	protein_coding
trans7d277fcf39e4f2ac	Kidney Renal Papillary Cell Carcinoma	Kidney	Primary	85.1576	5.64097	9.86536	4	AMACR	LTR/ERVL|LTR33A|5|33986535|33986963;LTR/ERVL-MaLR|MLT1L|5|33988059|33988546	chr5	33986200	34008146	-	-	ENSG00000242110.7	protein_coding	protein_coding
trans170e9c6ac28afb54	Bladder Urothelial Carcinoma	Bladder	Primary	3.1568	0.0795984	0.926349	4	AC098973.2	LTR/ERVL-MaLR|MLT1H|3|27859892|27860354	chr3	27821574	27860663	+	+	ENSG00000225548.5	lincRNA	lincRNA
transfbbfcf07e8e0ba42	Brain Lower Grade Glioma	Brain	Primary	231.944	24.4084	53.8019	12	SCG3	LTR/ERV1|LTR12F|15|51720625|51721139	chr15	51680799	51721025	+	+	ENSG00000104112.8	protein_coding	protein_coding
trans171b8b32a340f9b8	Lung Squamous Cell Carcinoma	Lung	Primary	0.913081	0.240866	0	3	NA	LTR/ERV1|MER4D1|8|114669285|114669853	chr8	114636923	114669823	*	*	NA	NA	NA
trans1c50d57e62d45ff6	Breast Invasive Carcinoma	Breast	Primary	1071.86	174.944	113.395	4	COX6C	LTR/ERV1|LTR23|8|99892051|99892180	chr8	99878152	99893659	-	-	ENSG00000164919.10	protein_coding	protein_coding
trans171bb5b54cdd7b43	Esophageal Carcinoma	Esophagus	Primary	2.67564	0	0.122806	2	NA	LTR/ERV1|HERVH-int~LTR7Y|1|68386004|68391994	chr1	68386279	68388674	*	*	NA	NA	NA
trans16c071fb3d314acd	Testicular Germ Cell Tumors	Testis	Primary	22.9293	5.16655e-06	0	2	NA	LTR/ERV1|HERVH-int~LTR7Y|19|5548576|5552763;LTR/ERV1|LTR7Y|19|5552772|5553212	chr19	5548982	5553151	*	*	NA	NA	NA
trans47e5ddcd89fac06e	Stomach Adenocarcinoma	Stomach	Primary	71.8599	9.96386	17.2721	5	CCL20	LTR/ERV1|LTR2C|2|227805691|227806180	chr2	227805946	227817535	+	+	ENSG00000115009.11	protein_coding	protein_coding
trans170e9c6ac28afb54	Lung Squamous Cell Carcinoma	Lung	Primary	1.71228	0.0795984	0	4	AC098973.2	LTR/ERVL-MaLR|MLT1H|3|27859892|27860354	chr3	27821574	27860663	+	+	ENSG00000225548.5	lincRNA	lincRNA
transe5d7d481d9becbc8	Lymphoid Neoplasm Diffuse Large B-cell Lymphoma	Lymph Nodes	Primary	1.83313	0.0643833	0	2	AC020743.3	LTR/ERVL-MaLR|MLT1H|7|50202508|50202938	chr7	50201782	50204138	*	-	ENSG00000231681.1	lincRNA	lincRNA
trans1768741dd95a3f1c	Lymphoid Neoplasm Diffuse Large B-cell Lymphoma	Lymph Nodes	Primary	29.9415	1.44487	0.0830004	2	GM2A	LTR/ERV1|MER84|5|151269470|151269544;LTR/ERV1|MER84|5|151269545|151269954	chr5	151268259	151280261	*	*	ENSG00000196743.8	protein_coding	protein_coding
trans17e40f6db686fad0	Skin Cutaneous Melanoma	Skin	Primary	5.50183	0.0452086	0.0315095	4	LINC01474	LTR/ERVL-MaLR|MLT1O|9|72871977|72872167;LTR/ERVL-MaLR|MSTA|9|72873938|72874322	chr9	72871739	72874247	-	-	ENSG00000236849.5	lincRNA	lincRNA
trans25e9bbf991830922	Skin Cutaneous Melanoma	Skin	Metastasis	40.785	1.50716	0.416552	5	RP1-90G24.10	LTR/ERVL-MaLR|THE1C|22|32216936|32217320	chr22	32184934	32218079	*	*	ENSG00000242082.1	antisense	antisense
transa049c63c97c2bf45	Prostate Adenocarcinoma	Prostate	Primary	46.4145	2.02815	12.4324	2	RPL7P16	LTR/ERVL|LTR33|3|132259705|132260166	chr3	132244048	132260298	*	*	ENSG00000242899.1	processed_pseudogene	processed_pseudogene
trans180e343a1d5791fc	Testicular Germ Cell Tumors	Testis	Primary	3.67306	0	0	2	NA	LTR/ERV1|HERVH-int~LTR7Y|9|82701562|82706286	chr9	82701603	82701846	*	*	NA	NA	NA
trans47e5ddcd89fac06e	Esophageal Carcinoma	Esophagus	Primary	69.0733	9.96386	3.83911	5	CCL20	LTR/ERV1|LTR2C|2|227805691|227806180	chr2	227805946	227817535	+	+	ENSG00000115009.11	protein_coding	protein_coding
trans61b6e0dcc052c582	Brain Lower Grade Glioma	Brain	Primary	415.434	55.4131	120.436	4	LINC00945	LTR/ERVL|LTR33|21|32913710|32913833	chr21	32833150	33072419	*	*	ENSG00000232539.1	lincRNA	lincRNA
transec20a8600e3566a1	Prostate Adenocarcinoma	Prostate	Primary	149.966	14.4744	7.66212	6	C1QTNF3-AMACR	LTR/ERVL|LTR33A|5|33986535|33986963;LTR/ERVL-MaLR|MLT1L|5|33988059|33988546	chr5	33984987	34007994	-	-	ENSG00000273294.1	protein_coding	nonsense_mediated_decay
transb394b1afccb46423	Skin Cutaneous Melanoma	Skin	Primary	9.93651	0.0547637	0.0347143	4	AC145110.1	LTR/ERVL-MaLR|MSTA|8|29747935|29748353;LTR/ERVL-MaLR|MLT1B|8|29748354|29748657	chr8	29748286	29798488	+	+	ENSG00000253490.5	lincRNA	lincRNA
trans97b3c51bf6a62bc9	Skin Cutaneous Melanoma	Skin	Primary	2.01426	0.0280931	0.0289241	2	AC145110.1	LTR/Gypsy|LTR104_Mam|8|29792177|29792477;LTR/ERV1|MER31B|8|29792625|29792982	chr8	29790239	29793260	*	-	ENSG00000253490.5	lincRNA	lincRNA
transb0dd42102677e710	Testicular Germ Cell Tumors	Testis	Primary	43.8396	1.88862	0.0099135	2	RP11-320N7.2	LTR/ERV1|HERVH-int~LTR7|12|4018541|4023694	chr12	4018992	4026749	*	*	ENSG00000256969.1	lincRNA	lincRNA
trans196f4f058204af5b	Testicular Germ Cell Tumors	Testis	Primary	1.86206	0	0	2	LINC01090	LTR/ERV1|LTR7|2|188033498|188033915;LTR/ERV1|HERVH-int~LTR7|2|188034375|188039140	chr2	188033621	188039099	*	*	ENSG00000231689.2	lincRNA	lincRNA
trans29fa75a2f9189d8d	Lymphoid Neoplasm Diffuse Large B-cell Lymphoma	Lymph Nodes	Primary	160.589	16.2057	9.04474	2	OR2I1P	LTR/ERV1|MER57F|6|29552528|29552933	chr6	29552554	29559936	*	*	ENSG00000237988.3	unprocessed_pseudogene	unprocessed_pseudogene
trans19c1868ab68aac75	Skin Cutaneous Melanoma	Skin	Primary	16.1153	2.64271	0.48988	2	LINC01317	LTR/ERVL-MaLR|MLT1C2|2|33926749|33927110	chr2	33926885	33944555	*	*	ENSG00000203386.6	lincRNA	lincRNA
trans1a6388ec984eee3d	Prostate Adenocarcinoma	Prostate	Primary	33.8374	0.710539	1.15145	2	PCAT14	LTR/ERVK|HERVK-int~LTR5B|22|23537740|23546004;LTR/ERVK|HERVK-int|22|23546306|23546576;LTR/ERVK|LTR5B|22|23546583|23546900	chr22	23545729	23546764	*	*	ENSG00000280623.1	lincRNA	lincRNA
trans1a6388ec984eee3d	Testicular Germ Cell Tumors	Testis	Primary	27.4767	0.710539	1.5304	2	PCAT14	LTR/ERVK|HERVK-int~LTR5B|22|23537740|23546004;LTR/ERVK|HERVK-int|22|23546306|23546576;LTR/ERVK|LTR5B|22|23546583|23546900	chr22	23545729	23546764	*	*	ENSG00000280623.1	lincRNA	lincRNA
transbc2cb9416cf409ac	Esophageal Carcinoma	Esophagus	Primary	21.2724	0	0	2	NA	LTR/ERV1|HERVH-int~LTR7Y|X|4540474|4546320	chrX	4544921	4545528	*	*	NA	NA	NA
transc3d80b34207cff4d	Prostate Adenocarcinoma	Prostate	Primary	35.0842	1.14341	7.05615	3	MIPEP	LTR/ERV1|HUERS-P3-int~LTR9B|13|23734563|23735363	chr13	23715139	23736311	*	*	ENSG00000027001.9	protein_coding	protein_coding
transd014537c3d3d0839	Testicular Germ Cell Tumors	Testis	Primary	21.0778	0	0	2	AC016743.1	LTR/ERV1|HERVH-int~LTR7|2|209299313|209304932	chr2	209299370	209304768	*	*	ENSG00000276683.1	miRNA	miRNA
transa9ba8f5af6c9b983	Testicular Germ Cell Tumors	Testis	Primary	21.6632	0.0525747	0.165592	3	LSAMP	LTR/ERV1|HERVH-int~LTR7Y|3|116105357|116111228	chr3	116105864	116110032	*	*	ENSG00000185565.11	protein_coding	protein_coding
trans2245ce039cf578d6	Mesothelioma	Pleura	Primary	32.5572	0.98097	NA	2	LINC01615	LTR/ERVL-MaLR|MLT1B|6|169160797|169161165	chr6	169158040	169161272	*	*	ENSG00000223485.2	lincRNA	lincRNA
trans1ea49dad67a4367b	Ovarian Serous Cystadenocarcinoma	Ovary	Primary	62.2264	4.01943	0.145123	16	MSLN	LTR/ERVL|MER54B|16|760973|761306	chr16	760799	769198	+	+	ENSG00000102854.14	protein_coding	protein_coding
transff4682f767b8ddd3	Prostate Adenocarcinoma	Prostate	Primary	50.0142	2.76227	14.5167	2	RPL7P16	LTR/ERVL|LTR33|3|132259705|132260166	chr3	132244081	132259913	*	*	ENSG00000242899.1	processed_pseudogene	processed_pseudogene
trans007de961699127fc	Head and Neck Squamous Cell Carcinoma	Head and Neck	Primary	28.7673	0.68448	4.45011	5	CXCL11	LTR/ERVL-MaLR|MLT1N2|4|76033093|76033323	chr4	76030246	76036185	-	-	ENSG00000169248.12	protein_coding	protein_coding
trans309e345b61b6bd87	Cervical Squamous Cell Carcinoma and Endocervical Adenocarcinoma	Cervix	Primary	860.699	145.141	72.4841	2	APOL1	LTR/ERVL|LTR57|22|36267213|36267606	chr22	36266560	36267523	*	*	ENSG00000100342.20	protein_coding	protein_coding
trans1a8943257e4bc12b	Lung Squamous Cell Carcinoma	Lung	Primary	4.11473	0.0791909	0.0216554	1	RP11-758M4.4	LTR/ERV1|MER41B|8|74796422|74797044	chr8	74793854	74799038	*	*	ENSG00000253706.5	antisense	antisense
transfe685227d08869e4	Glioblastoma Multiforme	Brain	Primary	21.8714	0.113194	1.64118	2	TCEB1P18	LTR/ERV1|LTR17|1|68392098|68392789	chr1	68366462	68392536	*	*	ENSG00000237622.1	processed_pseudogene	processed_pseudogene
trans1195818c844ed2d9	Prostate Adenocarcinoma	Prostate	Primary	76.2311	5.80604	21.9973	5	TRGC1	LTR/ERV1|MER4C|7|38258953|38259025	chr7	38257919	38269602	*	*	ENSG00000211689.7	TR_C_gene	TR_C_gene
transc033b570f12b9fdd	Prostate Adenocarcinoma	Prostate	Primary	32.1945	0.0525328	0.944843	12	ACSM1	LTR/ERVL-MaLR|MLT1O|16|20691586|20692112	chr16	20624178	20691680	-	-	ENSG00000166743.9	protein_coding	protein_coding
trans4569d8bc812d5598	Stomach Adenocarcinoma	Stomach	Primary	67.3331	9.94213	15.6565	5	CCL20	LTR/ERV1|LTR2C|2|227805691|227806180	chr2	227805946	227817535	+	+	ENSG00000115009.11	protein_coding	protein_coding
trans7300b6826e029fcf	Testicular Germ Cell Tumors	Testis	Primary	20.1791	0	0	2	RP3-399L15.3	LTR/ERV1|HERVH-int~LTR7|6|114422439|114427032;LTR/ERV1|HERVH-int~LTR7|6|114427165|114428297	chr6	114425829	114427449	*	*	ENSG00000228624.7	antisense	antisense
trans29fa75a2f9189d8d	Stomach Adenocarcinoma	Stomach	Primary	151.455	16.2057	14.6657	2	OR2I1P	LTR/ERV1|MER57F|6|29552528|29552933	chr6	29552554	29559936	*	*	ENSG00000237988.3	unprocessed_pseudogene	unprocessed_pseudogene
transd31c250788456127	Uveal Melanoma	Eye	Primary	20.1742	0.00728385	NA	44	MYO9B	LTR/ERV1|LTR10E|19|16221234|16221785;LTR/ERVL|LTR16A1|19|17184032|17184354	chr19	16069430	17192993	+	+	ENSG00000099331.13	protein_coding	protein_coding
transc1d3efc6553dcd55	Glioblastoma Multiforme	Brain	Primary	21.095	0.086193	0.30265	2	ZNF280D	LTR/ERVL-MaLR|MLT1L|15|56916698|56917113	chr15	56916696	56918557	*	*	ENSG00000137871.19	protein_coding	protein_coding
transd6b3da5ed8e5a8b4	Kidney Renal Papillary Cell Carcinoma	Kidney	Primary	58.6485	9.49347	8.7489	6	C1QTNF3-AMACR	LTR/ERVL|LTR33A|5|33986535|33986963;LTR/ERVL-MaLR|MLT1L|5|33988059|33988546	chr5	33984920	34008182	-	-	ENSG00000273294.1	protein_coding	nonsense_mediated_decay
trans1b33af76c00c3fc0	Head and Neck Squamous Cell Carcinoma	Head and Neck	Primary	1.91719	0.0272421	0.165599	3	NA	LTR/ERVL|MLT2D|7|42383674|42384088;LTR/ERVL|MLT2C2|7|42385085|42385222;LTR/ERVL-MaLR|MLT1E3|7|42385223|42385254;LTR/Gypsy|LTR104_Mam|7|42385951|42386458	chr7	42383134	42389815	*	*	NA	NA	NA
trans3846526f14dcda98	Testicular Germ Cell Tumors	Testis	Primary	21.268	0.12164	0.0570682	3	LSAMP	LTR/ERV1|HERVH-int~LTR7Y|3|116105357|116111228	chr3	116105414	116111005	*	*	ENSG00000185565.11	protein_coding	protein_coding
trans1b4216b57a457d3e	Testicular Germ Cell Tumors	Testis	Primary	12.0861	0	0	2	NA	LTR/ERV1|HERVH-int~LTR7Y|10|90294983|90300722	chr10	90295099	90300618	*	*	NA	NA	NA
trans2ddb78f6a825203b	Cholangiocarcinoma	Bile Duct	Primary	64.99	4.73816	1.3196	3	UCA1	LTR/ERV1|HERVH-int~LTR7C|19|15828738|15834726;LTR/ERV1|HERV30-int|19|15834956|15835435;LTR/ERV1|LTR7C|19|15835691|15836170	chr19	15829316	15836778	+	+	ENSG00000214049.6	processed_transcript	lincRNA
trans1b61a15f5866d051	Testicular Germ Cell Tumors	Testis	Primary	25.3149	0	0	2	SEMA3E	LTR/ERV1|HERVH-int~LTR7|7|83459668|83465383	chr7	83460185	83465089	*	*	ENSG00000170381.12	protein_coding	protein_coding
trans1bbbe1e021c107b9	Testicular Germ Cell Tumors	Testis	Primary	88.0677	0.158159	0	2	RP11-320N7.2	LTR/ERV1|HERVH-int~LTR7|12|4018541|4023694	chr12	4022345	4024045	*	*	ENSG00000256969.1	lincRNA	lincRNA
trans1bd121be6f64e754	Lung Squamous Cell Carcinoma	Lung	Primary	4.14607	0.0954351	0.0224898	2	AKR1C3	LTR/ERV1|LTR26|10|5080791|5081340	chr10	5077574	5080903	*	*	ENSG00000196139.12	protein_coding	protein_coding
trans24bf8ee9780319bd	Bladder Urothelial Carcinoma	Bladder	Primary	4.98243	0.29723	0.602333	9	TRPM2	LTR/ERV1|LTR45C|21|44414530|44414996	chr21	44414595	44442807	+	+	ENSG00000142185.16	protein_coding	protein_coding
trans1519c7aa41821d56	Testicular Germ Cell Tumors	Testis	Primary	27.3414	0.714348	0	4	ESRG	LTR/ERV1|MER110A|3|54632465|54632901;LTR/ERV1|HERVH-int~LTR7|3|54634484|54640204	chr3	54632143	54637713	-	-	ENSG00000265992.1	sense_intronic	sense_intronic
transa81aa55c07885ccb	Esophageal Carcinoma	Esophagus	Primary	19.1208	0	0	2	NA	LTR/ERV1|HERVH-int~LTR7Y|X|4540474|4546320	chrX	4544802	4545462	*	*	NA	NA	NA
trans1bdc98abcffcab4e	Lymphoid Neoplasm Diffuse Large B-cell Lymphoma	Lymph Nodes	Primary	4.45035	0.144835	0.122986	2	AC006509.4	LTR/ERVL-MaLR|MLT1A|2|47709604|47709880	chr2	47702776	47709816	*	*	ENSG00000224443.1	processed_pseudogene	processed_pseudogene
trans24bf8ee9780319bd	Breast Invasive Carcinoma	Breast	Primary	1.3647	0.29723	4.77854e-05	9	TRPM2	LTR/ERV1|LTR45C|21|44414530|44414996	chr21	44414595	44442807	+	+	ENSG00000142185.16	protein_coding	protein_coding
trans1bdc98abcffcab4e	Testicular Germ Cell Tumors	Testis	Primary	5.34626	0.144835	0	2	AC006509.4	LTR/ERVL-MaLR|MLT1A|2|47709604|47709880	chr2	47702776	47709816	*	*	ENSG00000224443.1	processed_pseudogene	processed_pseudogene
transa2af6789a9a5c31a	Esophageal Carcinoma	Esophagus	Primary	19.4646	0.0704225	0.492251	2	NA	LTR/ERV1|HERVH-int~LTR7Y|X|3553142|3557554;LTR/ERV1|LTR7Y|X|3559728|3560161	chrX	3553216	3560161	*	*	NA	NA	NA
trans1c5f78931fc804a0	Esophageal Carcinoma	Esophagus	Primary	1.01794	0.0383471	0.218463	1	AGFG1	LTR/ERVL-MaLR|MLT1H2|2|227494758|227494863	chr2	227491665	227495309	*	*	ENSG00000173744.17	protein_coding	protein_coding
trans9591835f73742232	Head and Neck Squamous Cell Carcinoma	Head and Neck	Primary	22.3621	0.350793	1.5886	4	RP4-620F22.2	LTR/ERV1|LTR12C|1|89272453|89273890	chr1	89269386	89274143	*	*	ENSG00000237568.1	antisense	antisense
transa166f9858272ec14	Testicular Germ Cell Tumors	Testis	Primary	84.8854	7.94749	15.8214	7	RBM48	LTR/ERV1|HERV17-int~LTR17|7|92467971|92475579	chr7	92468381	92568035	*	*	ENSG00000127993.14	protein_coding	protein_coding
trans12e0574064807000	Testicular Germ Cell Tumors	Testis	Primary	21.5834	0.283412	0.468676	3	NA	LTR/ERVL-MaLR|MLT1C2|13|42850308|42850709;LTR/ERVL|LTR16A|13|42865885|42866151;LTR/ERVL|MLT2B3|13|42866152|42866692;LTR/ERVL|LTR16A|13|42866693|42866819	chr13	42849704	42866876	*	*	NA	NA	NA
trans62fce9061ceac841	Esophageal Carcinoma	Esophagus	Primary	18.2732	0	0.277055	2	NA	LTR/ERV1|HERVH-int~LTR7Y|1|68386004|68391994	chr1	68386990	68387312	*	*	NA	NA	NA
trans76accbc863272209	Uterine Carcinosarcoma	Uterus	Primary	371.562	64.6784	62.6324	10	RP1-37C10.3	LTR/ERV1|LTR64|1|16981568|16981905	chr1	16974503	16981652	-	-	ENSG00000226526.1	antisense	antisense
trans7fbdff6e0198ab92	Mesothelioma	Pleura	Primary	659.817	117.407	NA	5	LY6E	LTR/ERVL|MER21A|8|143016840|143017196	chr8	143016943	143022408	+	+	ENSG00000160932.10	protein_coding	protein_coding
trans02b38bca9cadd89a	Uveal Melanoma	Eye	Primary	20.8083	0.249429	NA	2	NA	LTR/ERVL|HERVL66-int~LTR66|1|226535600|226543017	chr1	226536012	226536506	*	*	NA	NA	NA
transb8b4e20d151b1663	Prostate Adenocarcinoma	Prostate	Primary	3.53277	0.20017	0.110715	4	ADAM2	LTR/ERV1|HERVI-int~LTR10G|8|39848199|39853109	chr8	39824806	39852475	-	-	ENSG00000104755.14	protein_coding	protein_coding
trans7fbdff6e0198ab92	Ovarian Serous Cystadenocarcinoma	Ovary	Primary	650.548	117.407	82.1402	5	LY6E	LTR/ERVL|MER21A|8|143016840|143017196	chr8	143016943	143022408	+	+	ENSG00000160932.10	protein_coding	protein_coding
trans24bf8ee9780319bd	Cervical Squamous Cell Carcinoma and Endocervical Adenocarcinoma	Cervix	Primary	1.27298	0.29723	0.208061	9	TRPM2	LTR/ERV1|LTR45C|21|44414530|44414996	chr21	44414595	44442807	+	+	ENSG00000142185.16	protein_coding	protein_coding
transf5463099fed89a2d	Ovarian Serous Cystadenocarcinoma	Ovary	Primary	110.232	12.1099	0.155374	2	NA	LTR/ERV1|HERV30-int~LTR30|10|53025174|53026354;LTR/ERV1|HERV30-int~LTR30|10|53026355|53030661	chr10	53025291	53030136	*	*	NA	NA	NA
trans1cde5340618b4793	Testicular Germ Cell Tumors	Testis	Primary	8.38653	0.0300419	0.0140299	4	AC092846.1	LTR/ERV1|HERVH-int~LTR7Y|4|24323284|24328212;LTR/ERV1|HERVH-int~LTR7|4|24500975|24506750;LTR/ERVL-MaLR|MLT1K|4|24506965|24507075;LTR/ERVL|LTR16C|4|24507529|24507859	chr4	24327651	24508373	*	*	ENSG00000222262.1	miRNA	miRNA
trans24bf8ee9780319bd	Colon Adenocarcinoma	Colorectal	Primary	3.64805	0.29723	0.0561877	9	TRPM2	LTR/ERV1|LTR45C|21|44414530|44414996	chr21	44414595	44442807	+	+	ENSG00000142185.16	protein_coding	protein_coding
transfe7942292326f669	Ovarian Serous Cystadenocarcinoma	Ovary	Primary	47.9336	3.30351	0	4	C1orf186	LTR/ERV1|LTR2B|1|206052519|206053000	chr1	206052822	206061896	*	*	ENSG00000263961.6	protein_coding	protein_coding
trans24bf8ee9780319bd	Lung Squamous Cell Carcinoma	Lung	Primary	2.44585	0.29723	0	9	TRPM2	LTR/ERV1|LTR45C|21|44414530|44414996	chr21	44414595	44442807	+	+	ENSG00000142185.16	protein_coding	protein_coding
transb89c2c5a90b057a2	Sarcoma	Soft Tissue	Primary	60.9525	5.01918	NA	4	XRCC6	LTR/ERVL|LTR50|22|41656680|41656850	chr22	41656508	41664040	+	+	ENSG00000196419.12	protein_coding	protein_coding
transb89c2c5a90b057a2	Thymoma	Thymus	Primary	60.9295	5.01918	2.21648	4	XRCC6	LTR/ERVL|LTR50|22|41656680|41656850	chr22	41656508	41664040	+	+	ENSG00000196419.12	protein_coding	protein_coding
trans24bf8ee9780319bd	Rectum Adenocarcinoma	Colorectal	Primary	4.13458	0.29723	0.0561877	9	TRPM2	LTR/ERV1|LTR45C|21|44414530|44414996	chr21	44414595	44442807	+	+	ENSG00000142185.16	protein_coding	protein_coding
transb73331a90073af06	Pheochromocytoma and Paraganglioma	Adrenal Gland	Primary	14.5411	0.0716679	0.789819	45	ADAMTSL2	LTR/ERV1|MER39|9|133483549|133484175;LTR/ERVL-MaLR|THE1D|9|133500230|133500555	chr9	133483602	133667216	*	*	ENSG00000197859.9	protein_coding	protein_coding
transa0083d08d2c0aeb5	Lymphoid Neoplasm Diffuse Large B-cell Lymphoma	Lymph Nodes	Primary	66.9193	5.89591	8.9092	13	LILRB4	LTR/ERVL-MaLR|MLT1D|19|54662132|54662619	chr19	54662411	54668141	+	+	ENSG00000186818.12	protein_coding	protein_coding
trans98adcca99e22ffbb	Testicular Germ Cell Tumors	Testis	Primary	33.9204	1.68833	0.385626	2	ZNF486	LTR/ERV1|LTR70|19|20220441|20221668	chr19	20060060	20222033	*	*	ENSG00000256229.7	protein_coding	protein_coding
transa904972c8916b953	Testicular Germ Cell Tumors	Testis	Primary	207.419	29.2237	20.0009	2	SERPINB9	LTR/ERV1|MER50|6|2887878|2887989	chr6	2887847	2898790	*	*	ENSG00000170542.5	protein_coding	protein_coding
trans1dbee9772befdf29	Esophageal Carcinoma	Esophagus	Primary	1.49152	0.0219073	0.189104	3	TMC5	LTR/ERVL-MaLR|MLT1B|16|19486678|19486853	chr16	19486646	19490498	+	+	ENSG00000103534.16	protein_coding	protein_coding
transf1185eb032b0100f	Testicular Germ Cell Tumors	Testis	Primary	25.6322	0.81538	0	2	PYGL	LTR/ERV1|HERVH-int~LTR7|14|50893162|50896881	chr14	50895699	50896821	*	*	ENSG00000100504.16	protein_coding	protein_coding
trans42c6cf1574e07bd2	Pheochromocytoma and Paraganglioma	Adrenal Gland	Primary	19.1533	0.17412	0	2	CH17-340M24.3	LTR/ERVL-MaLR|MLT1C|X|154424336|154424711	chrX	154424387	154428539	*	*	ENSG00000197180.2	lincRNA	lincRNA
trans70976c9e6a2e45fc	Rectum Adenocarcinoma	Colorectal	Primary	18.8263	2.15168	3.47676	36	PLCB4	LTR/Gypsy|MamGypLTR2c|20|9481093|9481466	chr20	9332962	9481241	+	+	ENSG00000101333.16	protein_coding	protein_coding
trans274f7cd0d9096082	Testicular Germ Cell Tumors	Testis	Primary	17.7197	0.0519117	0.0856966	4	LMNB1	LTR/ERV1|HERVH-int~LTR7|5|126839337|126844266	chr5	126803263	126844334	*	*	ENSG00000113368.11	protein_coding	protein_coding
trans29fa75a2f9189d8d	Liver Hepatocellular Carcinoma	Liver	Primary	131.382	16.2057	15.9179	2	OR2I1P	LTR/ERV1|MER57F|6|29552528|29552933	chr6	29552554	29559936	*	*	ENSG00000237988.3	unprocessed_pseudogene	unprocessed_pseudogene
trans1dbee9772befdf29	Stomach Adenocarcinoma	Stomach	Primary	1.76393	0.0219073	0.223772	3	TMC5	LTR/ERVL-MaLR|MLT1B|16|19486678|19486853	chr16	19486646	19490498	+	+	ENSG00000103534.16	protein_coding	protein_coding
transe6479c565a196c8d	Uveal Melanoma	Eye	Primary	272.098	42.1773	NA	2	PRCD	LTR/ERVL-MaLR|THE1B|17|76564566|76564680	chr17	76476033	76565347	*	*	ENSG00000214140.10	protein_coding	protein_coding
trans1dd807b272808700	Lung Squamous Cell Carcinoma	Lung	Primary	2.72486	0	0	3	NA	LTR/ERVL-MaLR|MLT1B|8|114673660|114674048	chr8	114636927	114673914	*	*	NA	NA	NA
transf1eac0f2b2167e39	Testicular Germ Cell Tumors	Testis	Primary	18.5829	0.151272	3.7001e-07	2	HLA-DPB2	LTR/ERV1|HUERS-P3b-int~LTR9C|6|33117740|33118640;LTR/ERV1|MER83B-int|6|33118933|33119102;LTR/ERV1|HUERS-P3b-int|6|33119104|33121937	chr6	33116853	33119159	*	*	ENSG00000224557.7	transcribed_unprocessed_pseudogene	transcribed_unprocessed_pseudogene
transfe4b1767297a0c6d	Sarcoma	Soft Tissue	Primary	69.8161	19.3118	NA	14	CPXM1	LTR/ERV1|MER84~MER84-int|20|2800876|2801724	chr20	2794075	2801029	-	-	ENSG00000088882.7	protein_coding	protein_coding
transc0a1337c8d7250d4	Glioblastoma Multiforme	Brain	Primary	54.7398	4.55795	16.2484	2	RNU1-27P	LTR/ERVL-MaLR|MLT1L|14|34542885|34543223	chr14	34543121	34546850	*	*	ENSG00000206596.1	snRNA	snRNA
transc0a1ecaf9a3492ff	Uterine Corpus Endometrial Carcinoma	Uterus	Primary	184.147	26.0816	17.5843	4	IFI27	LTR?|Eutr5|14|94110371|94110617	chr14	94110543	94116695	+	+	ENSG00000165949.12	protein_coding	protein_coding
trans1dd807b272808700	Thymoma	Thymus	Primary	1.9239	0	0	3	NA	LTR/ERVL-MaLR|MLT1B|8|114673660|114674048	chr8	114636927	114673914	*	*	NA	NA	NA
transc37fe09460cb1013	Kidney Renal Papillary Cell Carcinoma	Kidney	Primary	53.4597	4.39635	13.1253	2	UGT2B11	LTR/ERV1|HERV3-int|4|69063344|69063382;LTR/ERV1|LTR76|4|69064124|69064798	chr4	69063344	69065763	*	*	ENSG00000213759.8	protein_coding	protein_coding
trans24bf8ee9780319bd	Skin Cutaneous Melanoma	Skin	Primary	3.00966	0.29723	0.0104061	9	TRPM2	LTR/ERV1|LTR45C|21|44414530|44414996	chr21	44414595	44442807	+	+	ENSG00000142185.16	protein_coding	protein_coding
trans4569d8bc812d5598	Colon Adenocarcinoma	Colorectal	Primary	56.4235	9.94213	16.4635	5	CCL20	LTR/ERV1|LTR2C|2|227805691|227806180	chr2	227805946	227817535	+	+	ENSG00000115009.11	protein_coding	protein_coding
transcb08fa26a9b086a6	Uveal Melanoma	Eye	Primary	17.4945	0.0775765	NA	43	MYO9B	LTR/ERV1|LTR10E|19|16221234|16221785;LTR/ERVL|LTR16A1|19|17184032|17184354	chr19	16069430	17192993	+	+	ENSG00000099331.13	protein_coding	protein_coding
transfea942ee027cf30f	Kidney Renal Papillary Cell Carcinoma	Kidney	Primary	42.1006	2.90512	11.201	2	UGT2B11	LTR/ERV1|Harlequin-int~LTR2B|4|69050860|69051710;LTR/ERV1|LTR76|4|69064124|69064798	chr4	69051323	69065848	*	*	ENSG00000213759.8	protein_coding	protein_coding
transa2af6789a9a5c31a	Head and Neck Squamous Cell Carcinoma	Head and Neck	Primary	17.3121	0.0704225	0.671991	2	NA	LTR/ERV1|HERVH-int~LTR7Y|X|3553142|3557554;LTR/ERV1|LTR7Y|X|3559728|3560161	chrX	3553216	3560161	*	*	NA	NA	NA
trans24bf8ee9780319bd	Stomach Adenocarcinoma	Stomach	Primary	1.05181	0.29723	0	9	TRPM2	LTR/ERV1|LTR45C|21|44414530|44414996	chr21	44414595	44442807	+	+	ENSG00000142185.16	protein_coding	protein_coding
trans1e899a2851178de9	Kidney Renal Papillary Cell Carcinoma	Kidney	Primary	1.65255	0	0.429083	2	RP5-887A10.1	LTR/ERVL|LTR40a|1|80628866|80629279;LTR/ERVL-MaLR|MLT1D|1|80630829|80631273	chr1	80628902	80630857	*	*	ENSG00000234184.5	lincRNA	lincRNA
trans7a565cf595205870	Brain Lower Grade Glioma	Brain	Primary	40.9128	2.82779	6.97314	23	RP3-518E13.2	LTR/ERV1|HERVFH21-int|1|175743596|175743785	chr1	175320702	175743762	-	-	ENSG00000260990.1	antisense	antisense
trans5ad5d3606788e8c3	Testicular Germ Cell Tumors	Testis	Primary	48.5095	3.85917	0.221394	2	KLRG2	LTR/ERVL-MaLR|MLT1G1|7|139450821|139451217	chr7	139450657	139478504	*	*	ENSG00000188883.4	protein_coding	protein_coding
transc0a1ecaf9a3492ff	Uterine Carcinosarcoma	Uterus	Primary	180.375	26.0816	17.5843	4	IFI27	LTR?|Eutr5|14|94110371|94110617	chr14	94110543	94116695	+	+	ENSG00000165949.12	protein_coding	protein_coding
trans0d1d95c3522a5441	Testicular Germ Cell Tumors	Testis	Primary	23.4037	0.730862	0.730323	2	RP11-215E13.1	LTR/ERV1|HERVH-int~LTR7Y|17|34183191|34188563;LTR/ERV1|LTR7Y|17|34188574|34188994	chr17	34183191	34188902	*	*	ENSG00000261156.6	lincRNA	lincRNA
trans2f40c5c9f3e9385e	Head and Neck Squamous Cell Carcinoma	Head and Neck	Primary	16.1957	0	0.335751	2	NA	LTR/ERV1|HERVH-int~LTR7Y|1|68386004|68391994	chr1	68386357	68387072	*	*	NA	NA	NA
trans91da794c560fd374	Uveal Melanoma	Eye	Primary	33.643	1.96097	NA	2	PNMA6B	LTR/Gypsy|MamGyp-int|X|153076012|153076969	chrX	153076478	153077516	*	*	ENSG00000268883.2	unprocessed_pseudogene	unprocessed_pseudogene
transaa937643b5a0c4b5	Uveal Melanoma	Eye	Primary	16.657	0.0545293	NA	4	RNU6-628P	LTR/ERVL-MaLR|MSTA|8|123250890|123251381	chr8	123251002	123274468	-	-	ENSG00000222607.1	snRNA	snRNA
trans85425d26d392ade2	Brain Lower Grade Glioma	Brain	Primary	20.1932	0.413355	5.74592	10	ETV1	LTR/ERVL-MaLR|MLT1D|7|13892530|13892985	chr7	13890687	13986556	-	-	ENSG00000006468.13	protein_coding	protein_coding
trans1ed88e6d89a9d8f5	Rectum Adenocarcinoma	Colorectal	Primary	842.351	176.008	185.012	6	CEACAM6	LTR/ERV1|MER65-int|19|41770580|41771854;LTR/ERV1|LTR54B|19|41771856|41772234	chr19	41755458	41772208	+	+	ENSG00000086548.8	protein_coding	protein_coding
transad66600ab2456ab4	Mesothelioma	Pleura	Primary	34.7116	2.12213	NA	8	UPK1B	LTR/ERVL|LTR16A|3|119172358|119172754	chr3	119171387	119204646	+	+	ENSG00000114638.7	protein_coding	protein_coding
trans3d7e74dff6c21ced	Testicular Germ Cell Tumors	Testis	Primary	24.7679	0.926014	0.870363	3	LINC00467	LTR/ERVK|MER11C|1|211398779|211399312;LTR/ERVK|HERVK11-int|1|211399313|211400600	chr1	211398636	211432795	+	+	ENSG00000153363.12	lincRNA	lincRNA
transa307e4f6401f3c0c	Ovarian Serous Cystadenocarcinoma	Ovary	Primary	28.0361	1.31515	0	4	C1orf186	LTR/ERV1|LTR2B|1|206052519|206053000;LTR/ERV1|Harlequin-int~LTR2B|1|206054886|206058912	chr1	206052526	206058712	*	*	ENSG00000263961.6	protein_coding	protein_coding
trans528435ad73cdb490	Testicular Germ Cell Tumors	Testis	Primary	18.3417	0.244345	2.37461	2	NA	LTR/Gypsy|MamGypLTR1c|7|77514580|77515103;LTR/ERVL-MaLR|MLT1F|7|77515106|77515621	chr7	77515085	77534391	*	*	NA	NA	NA
trans1eceda2acab8125d	Uterine Corpus Endometrial Carcinoma	Uterus	Primary	3.11239	0	0.147246	2	NA	LTR/ERVK|HERVK14-int~LTR14B|1|225800614|225801391	chr1	225796291	225801033	*	*	NA	NA	NA
trans7029220268a67a95	Pheochromocytoma and Paraganglioma	Adrenal Gland	Primary	357.888	63.6329	19.9091	5	CHRNA5	LTR/ERVL-MaLR|MLT1A0|15|78595690|78596031	chr15	78595255	78618916	-	-	ENSG00000169684.13	protein_coding	protein_coding
trans1f73e9f88616d8e3	Testicular Germ Cell Tumors	Testis	Primary	179.92	0.0090393	0.0677379	1	RP3-399L15.3	LTR/ERV1|HERVH-int~LTR7|6|114422439|114427032	chr6	114422470	114423467	*	*	ENSG00000228624.7	antisense	antisense
trans1f932e8c7d1d084b	Testicular Germ Cell Tumors	Testis	Primary	11.3587	0	0	2	NA	LTR/ERV1|HERVH-int~LTR7Y|6|102292727|102297331	chr6	102293793	102294183	*	*	NA	NA	NA
trans47e5ddcd89fac06e	Colon Adenocarcinoma	Colorectal	Primary	50.0329	9.96386	13.1318	5	CCL20	LTR/ERV1|LTR2C|2|227805691|227806180	chr2	227805946	227817535	+	+	ENSG00000115009.11	protein_coding	protein_coding
trans20a96214fc1102db	Head and Neck Squamous Cell Carcinoma	Head and Neck	Primary	3.65871	0	0	2	NA	LTR/ERV1|HERVH-int~LTR7|9|85458320|85466437	chr9	85459237	85459686	*	*	NA	NA	NA
trans95bd0cb0be654369	Testicular Germ Cell Tumors	Testis	Primary	28.227	0.360407	0.0709454	24	ALPPL2	LTR/ERV1|MER65-int~MER65A|2|232422437|232422992;LTR/ERV1|MER65-int|2|232425143|232426432	chr2	232406734	232466031	+	+	ENSG00000163286.7	protein_coding	protein_coding
trans331534ad189a541d	Lymphoid Neoplasm Diffuse Large B-cell Lymphoma	Lymph Nodes	Primary	74.4214	8.29522	0.266366	3	PARP1	LTR/ERVL-MaLR|MLT1O|1|226363461|226363822	chr1	226360692	226363532	-	-	ENSG00000143799.12	protein_coding	protein_coding
transcf63a3d7a431a097	Uveal Melanoma	Eye	Primary	15.4272	0.00899855	NA	56	MYO9B	LTR/ERV1|LTR10E|19|16221234|16221785;LTR/ERVL|LTR16A1|19|17184032|17184354	chr19	16069364	17192993	+	+	ENSG00000099331.13	protein_coding	protein_coding
trans64cebfc26093a187	Testicular Germ Cell Tumors	Testis	Primary	38.4294	2.83072	0.0876742	2	KLRG2	LTR/ERVL-MaLR|MLT1G1|7|139450821|139451217	chr7	139450559	139460959	*	*	ENSG00000188883.4	protein_coding	protein_coding
transd3a5367fa7a3adfc	Uveal Melanoma	Eye	Primary	41.8304	3.31529	NA	3	RP11-386M24.9	LTR/ERVL-MaLR|MSTC|15|92678052|92678466	chr15	92617451	92678325	-	-	ENSG00000271763.1	antisense	antisense
trans1bbffe553de2436a	Thyroid Carcinoma	Thyroid	Primary	48.8197	4.34837	1.25209	10	CLDN16	LTR/ERVL|MLT2A1|3|190370640|190371280	chr3	190306867	190412155	-	-	ENSG00000113946.3	protein_coding	protein_coding
trans114cffc0a048c085	Ovarian Serous Cystadenocarcinoma	Ovary	Primary	74.4722	8.53786	0	2	NA	LTR/ERV1|HERV30-int~LTR30|10|53025174|53026354;LTR/ERV1|HERV30-int~LTR30|10|53026355|53030661	chr10	53025291	53030136	*	*	NA	NA	NA
transc521804d31254445	Testicular Germ Cell Tumors	Testis	Primary	15.9371	0.100829	0.270536	2	NA	LTR/ERVL-MaLR|MLT1J|6|152688148|152688573	chr6	152641786	152689112	*	*	NA	NA	NA
transe21ead6425e08a33	Testicular Germ Cell Tumors	Testis	Primary	22.9752	0.0584407	0.0681779	2	AC226119.5	LTR/ERV1|HERVH-int~LTR7|4|3927446|3933080	chr4	3927972	3930938	*	+	ENSG00000253917.4	processed_transcript	processed_transcript
trans212bfc9c687599ee	Testicular Germ Cell Tumors	Testis	Primary	2.46375	0.0266254	0.0376236	4	GRID2	LTR/ERV1|HERVH-int~LTR7|4|92271492|92277648;LTR/ERV1|HERVH-int~LTR7|4|92438954|92444654	chr4	92262858	92439398	*	*	ENSG00000152208.11	protein_coding	protein_coding
trans5e567f4b83146d24	Kidney Renal Papillary Cell Carcinoma	Kidney	Primary	29.6795	1.77153	2.65727	12	WDR13	LTR/ERVL|LTR75|X|48589882|48590356	chrX	48589971	48622012	+	+	ENSG00000101940.17	protein_coding	protein_coding
transed9cc7c3a0ad5685	Uveal Melanoma	Eye	Primary	27.2973	2.12528	NA	4	MYO1D	LTR/ERVL-MaLR|MLT1C2|17|32747389|32747554	chr17	32712102	32747677	-	-	ENSG00000176658.16	protein_coding	protein_coding
transbe5e25ad351de5ba	Cervical Squamous Cell Carcinoma and Endocervical Adenocarcinoma	Cervix	Primary	450.091	90.2964	57.0446	5	AC007919.18	LTR/ERVL-MaLR|MLT1C2|3|172505310|172505469	chr3	172505382	172523558	-	-	ENSG00000224611.1	processed_pseudogene	processed_pseudogene
trans5242a12e7c32a678	Rectum Adenocarcinoma	Colorectal	Primary	76.6402	16.9743	20.9475	4	FERMT1	LTR/Gypsy|MamGypLTR1d|20|6075836|6076782	chr20	6075065	6085650	-	-	ENSG00000101311.15	protein_coding	protein_coding
transab455da7883e3ecd	Uterine Corpus Endometrial Carcinoma	Uterus	Primary	357.519	68.7362	45.3483	5	IFI27	LTR?|Eutr5|14|94110371|94110617	chr14	94110536	94116695	+	+	ENSG00000165949.12	protein_coding	protein_coding
transf03446130afafe94	Kidney Renal Clear Cell Carcinoma	Kidney	Primary	60.3518	6.5058	0.567071	6	TNFAIP6	LTR/ERV1|LTR54|2|151380467|151380905;LTR/ERV1|MER39|2|151381022|151381191	chr2	151357527	151381240	+	+	ENSG00000123610.4	protein_coding	protein_coding
transc208a5a4d2dd9142	Testicular Germ Cell Tumors	Testis	Primary	21.952	0.864283	0.200303	3	RP3-467D16.3	LTR/ERV1|HERVH-int~LTR7|6|16259012|16264893	chr6	16259115	16262578	*	*	ENSG00000282024.1	antisense	antisense
trans24bf8ee9780319bd	Uterine Carcinosarcoma	Uterus	Primary	1.64109	0.29723	0.201714	9	TRPM2	LTR/ERV1|LTR45C|21|44414530|44414996	chr21	44414595	44442807	+	+	ENSG00000142185.16	protein_coding	protein_coding
transc0d1c3e59dfb2d2e	Testicular Germ Cell Tumors	Testis	Primary	53.9453	5.52515	8.78019	2	UNG	LTR/ERV1|MER52C|12|109103269|109103327	chr12	109103221	109110992	+	+	ENSG00000076248.10	protein_coding	protein_coding
trans043f5739f27f3bb9	Testicular Germ Cell Tumors	Testis	Primary	21.3822	0.799551	0	4	ESRG	LTR/ERV1|MER110A|3|54632465|54632901;LTR/ERV1|MER61A|3|54633394|54633720;LTR/ERV1|HERVH-int~LTR7|3|54634484|54640204	chr3	54632143	54638033	-	-	ENSG00000265992.1	sense_intronic	sense_intronic
transa617c337cb3d15f3	Mesothelioma	Pleura	Primary	17.464	0.337243	NA	2	NA	LTR/ERV1|HERVH-int~LTR7|3|187466298|187472000	chr3	187466338	187469590	*	*	NA	NA	NA
transad27e359d26ca2bc	Pheochromocytoma and Paraganglioma	Adrenal Gland	Primary	38.1675	3.1147	0.593944	2	PRCD	LTR/ERVL-MaLR|MLT1L|17|76552998|76553448	chr17	76540500	76553600	*	*	ENSG00000214140.10	protein_coding	protein_coding
trans386a804845ee1ccd	Prostate Adenocarcinoma	Prostate	Primary	21.8906	0.885656	5.34676	4	AC006033.22	LTR/Gypsy|LTR81A|7|38304643|38305560	chr7	38304070	38319195	*	*	ENSG00000231916.1	processed_pseudogene	processed_pseudogene
transaa57c91ad56af446	Testicular Germ Cell Tumors	Testis	Primary	14.4674	0.0232621	0.547789	2	NA	LTR/ERV1|LTR7B|8|104285912|104286339;LTR/ERV1|HERVH-int~LTR7B|8|104286863|104292093	chr8	104285915	104291889	*	*	NA	NA	NA
trans280cfbd529d001cf	Skin Cutaneous Melanoma	Skin	Primary	14.8018	0.0630945	0	4	CSAG1	LTR/ERVL|MLT2C2|X|152728209|152728479	chrX	152727484	152733744	-	-	ENSG00000198930.12	protein_coding	protein_coding
transa50ff071ee2b79ab	Testicular Germ Cell Tumors	Testis	Primary	14.1367	0	0.1315	2	MIR3681HG	LTR/ERV1|HERVH-int~LTR7Y|2|12569680|12570735;LTR/ERV1|HERVH-int|2|12570843|12574997;LTR/ERV1|LTR7Y|2|12575007|12575439	chr2	12570231	12575262	*	*	ENSG00000224184.5	lincRNA	lincRNA
transcc36acd108e31f9a	Testicular Germ Cell Tumors	Testis	Primary	14.6265	0.0562131	0.121925	4	RP11-568A7.4	LTR/ERV1|HUERS-P1-int|6|167227675|167231799;LTR/ERV1|HUERS-P1-int|6|167232115|167232501;LTR/ERV1|MER4E|6|167236775|167237536	chr6	167227685	167237426	+	+	ENSG00000280707.2	lincRNA	lincRNA
transbbb5b6f94250f8c1	Uveal Melanoma	Eye	Primary	15.3676	0.139101	NA	49	MYO9B	LTR/ERV1|LTR10E|19|16221234|16221785;LTR/ERVL-MaLR|MLT1G1|19|16826248|16826528;LTR/ERVL|LTR16A1|19|17184032|17184354	chr19	16069236	17192993	+	+	ENSG00000099331.13	protein_coding	protein_coding
trans212eb4af55936d51	Ovarian Serous Cystadenocarcinoma	Ovary	Primary	4.8265	0.167762	0	2	NA	LTR/ERV1|HERV9NC-int~LTR12C|17|74906692|74908787	chr17	74906586	74907074	*	*	NA	NA	NA
transc9f09f5adb00aab3	Testicular Germ Cell Tumors	Testis	Primary	18.6299	0.525999	1.03672	5	PCAT14	LTR/ERVK|HERVK-int~LTR5_Hs|22|23536062|23537205;LTR/ERVK|HERVK-int~LTR5B|22|23537740|23546004;LTR/ERVK|HERVK-int|22|23546306|23546576;LTR/ERVK|LTR5B|22|23546583|23546900	chr22	23527542	23546764	+	+	ENSG00000280623.1	lincRNA	lincRNA
transbca1b29b0b05a399	Brain Lower Grade Glioma	Brain	Primary	39.1109	3.38894	8.96774	2	CX3CR1	LTR/ERVL-MaLR|MLT1K|3|39264800|39265214	chr3	39263496	39280105	*	*	ENSG00000168329.13	protein_coding	protein_coding
trans870dce3b4f24fda2	Uveal Melanoma	Eye	Primary	86.1979	11.5705	NA	9	RP13-735L24.1	LTR/ERV1|HERVE-int|12|9406304|9406453;LTR/ERV1|HERVE-int|12|9407305|9407906	chr12	9397063	9407347	-	-	ENSG00000260423.1	lincRNA	lincRNA
trans21cf20fc68651152	Head and Neck Squamous Cell Carcinoma	Head and Neck	Primary	2.5694	0.0356791	0.569817	1	SNX27	LTR/ERV1|LTR49-int|1|151647075|151647138;LTR/ERV1|LTR49-int|1|151647450|151647998	chr1	151647056	151648003	*	*	ENSG00000143376.12	protein_coding	protein_coding
transfe4b1767297a0c6d	Mesothelioma	Pleura	Primary	58.6859	19.3118	NA	14	CPXM1	LTR/ERV1|MER84~MER84-int|20|2800876|2801724	chr20	2794075	2801029	-	-	ENSG00000088882.7	protein_coding	protein_coding
trans24bf8ee9780319bd	Uterine Corpus Endometrial Carcinoma	Uterus	Primary	6.15943	0.29723	0.201714	9	TRPM2	LTR/ERV1|LTR45C|21|44414530|44414996	chr21	44414595	44442807	+	+	ENSG00000142185.16	protein_coding	protein_coding
trans331534ad189a541d	Testicular Germ Cell Tumors	Testis	Primary	68.0399	8.29522	8.72718	3	PARP1	LTR/ERVL-MaLR|MLT1O|1|226363461|226363822	chr1	226360692	226363532	-	-	ENSG00000143799.12	protein_coding	protein_coding
transae9caac928415bab	Kidney Renal Clear Cell Carcinoma	Kidney	Primary	322.454	63.6604	26.6554	9	RNASET2	LTR/ERVL-MaLR|MLT1C2|6|166951883|166952324	chr6	166929535	166956408	-	-	ENSG00000026297.15	protein_coding	protein_coding
trans5a5db390115dc0e6	Testicular Germ Cell Tumors	Testis	Primary	20.8693	0.852416	2.08157	2	NA	LTR/ERV1|HERVH-int~LTR7|8|144953919|144959586;LTR/ERV1|LTR7|8|144959589|144959998	chr8	144954096	144959976	*	*	NA	NA	NA
trans22239086ed79e56d	Kidney Renal Papillary Cell Carcinoma	Kidney	Primary	1.01116	0.0913234	0.157766	3	ERVH-1	LTR/ERV1|HERVH-int~LTR7|4|23722873|23726866;LTR/ERV1|LTR7|4|23727420|23727866	chr4	23722918	23733609	*	*	ENSG00000251292.1	lincRNA	lincRNA
transb3dcecc17bd07472	Testicular Germ Cell Tumors	Testis	Primary	15.7535	0.228074	0	2	NA	LTR/ERV1|HERVH-int~LTR7Y|1|233683447|233688285	chr1	233683621	233686636	*	*	NA	NA	NA
trans22cd066444614206	Stomach Adenocarcinoma	Stomach	Primary	2.0427	0.0910532	0.4103	1	PHACTR2	LTR/ERV1|MER31A|6|143603234|143603418	chr6	143603148	143603893	*	*	ENSG00000112419.14	protein_coding	protein_coding
transc90689da0e17bc12	Thyroid Carcinoma	Thyroid	Primary	75.8507	9.86886	7.64821	10	RP11-734K2.4	LTR/ERVL-MaLR|MLT1K|12|89400584|89400867	chr12	89348062	89532784	-	-	ENSG00000270344.2	antisense	antisense
trans3fa4db44387cb768	Mesothelioma	Pleura	Primary	36.3125	3.12612	NA	16	MSLN	LTR/ERVL|MER54B|16|760973|761306	chr16	760799	768861	+	+	ENSG00000102854.14	protein_coding	protein_coding
trans853a1367a15feabe	Bladder Urothelial Carcinoma	Bladder	Primary	16.5288	0.350029	0.332983	2	RP11-54H7.4	LTR/ERV1|LTR7Y|13|109264649|109265089;LTR/ERV1|LTR7Y|13|109265090|109265520;LTR/ERV1|HERVH-int~LTR7Y|13|109265521|109271116	chr13	109265052	109271076	*	*	ENSG00000275216.1	lincRNA	lincRNA
transbe5e25ad351de5ba	Kidney Renal Papillary Cell Carcinoma	Kidney	Primary	421.746	90.2964	116.248	5	AC007919.18	LTR/ERVL-MaLR|MLT1C2|3|172505310|172505469	chr3	172505382	172523558	-	-	ENSG00000224611.1	processed_pseudogene	processed_pseudogene
trans97a79e9a8bf9e75b	Ovarian Serous Cystadenocarcinoma	Ovary	Primary	25.3845	1.52809	0.0524477	4	C1orf186	LTR/ERV1|Harlequin-int~LTR2B|1|206054886|206058912	chr1	206055428	206061896	*	*	ENSG00000263961.6	protein_coding	protein_coding
transbc2cb9416cf409ac	Stomach Adenocarcinoma	Stomach	Primary	13.5064	0	0	2	NA	LTR/ERV1|HERVH-int~LTR7Y|X|4540474|4546320	chrX	4544921	4545528	*	*	NA	NA	NA
transc17b774084d73d69	Head and Neck Squamous Cell Carcinoma	Head and Neck	Primary	26.4812	1.68485	3.07971	2	NA	LTR/ERV1|HERVH-int~LTR7Y|4|182814310|182818919	chr4	182815251	182816498	*	*	NA	NA	NA
trans236622aefd8b5101	Lymphoid Neoplasm Diffuse Large B-cell Lymphoma	Lymph Nodes	Primary	3.41894	0	0	2	NA	LTR/ERVL-MaLR|THE1D|2|197356015|197356367	chr2	197348606	197356204	*	*	NA	NA	NA
trans29e4e6a54555f599	Mesothelioma	Pleura	Primary	15.1703	0.196812	NA	2	AC093673.5	LTR|LTR90A|7|143378876|143379324	chr7	143378848	143380361	*	*	ENSG00000232533.1	antisense	antisense
transf821bce495b58ce3	Ovarian Serous Cystadenocarcinoma	Ovary	Primary	45.4405	4.70589	4.28731	3	LINC00665	LTR/ERV1|LTR6B|19|36324873|36325429;LTR/ERV1|HERVS71-int~LTR6B|19|36327346|36331043	chr19	36324910	36331864	-	-	ENSG00000232677.6	lincRNA	lincRNA
trans46afcd89663b9fb6	Testicular Germ Cell Tumors	Testis	Primary	13.6218	0.0320804	0.289468	2	NA	LTR/ERV1|LTR7|6|152682945|152683394;LTR/ERVL-MaLR|MLT1J|6|152688148|152688573	chr6	152683149	152689198	*	*	NA	NA	NA
trans7e25821dd01cca39	Kidney Renal Papillary Cell Carcinoma	Kidney	Primary	21.2758	1.00806	3.65541	2	C1orf186	LTR/ERV1|Harlequin-int~LTR2B|1|206054886|206058912	chr1	206056482	206058002	*	*	ENSG00000263961.6	protein_coding	protein_coding
trans159869d471024062	Uveal Melanoma	Eye	Primary	26.3561	2.87969	NA	4	NA	LTR/ERV1|HERVIP10F-int~LTR10G|9|88037418|88040139;LTR/ERV1|HERVI-int~LTR10G|9|88043651|88044802;LTR/ERVL|ERVL-E-int|9|88059468|88060161;LTR/ERVL|LTR66|9|88065275|88065849	chr9	88037522	88066370	*	*	NA	NA	NA
trans9cb102f4aa971cdd	Brain Lower Grade Glioma	Brain	Primary	15.3947	0.264809	1.85581	2	NA	LTR/ERV1|HERVH-int~LTR7|10|25716423|25722927	chr10	25716821	25732935	+	+	NA	NA	NA
trans7b23b48f090106ec	Testicular Germ Cell Tumors	Testis	Primary	13.1739	0	0	7	HEXDC	LTR/ERV1|LOR1a|17|82507501|82507971	chr17	82410916	82508185	*	*	ENSG00000169660.15	protein_coding	protein_coding
transd6daa2f2b11740ac	Testicular Germ Cell Tumors	Testis	Primary	20.0914	0.875564	1.55773	2	RP11-265D19.6	LTR/ERVL|HERVL-int~MLT2A1|X|135394530|135395574	chrX	135394872	135397745	*	*	ENSG00000229015.1	lincRNA	lincRNA
trans23ac7f8adf014b36	Brain Lower Grade Glioma	Brain	Primary	1.47775	0.0135969	0.0359947	1	NA	LTR/ERVL-MaLR|MLT1J|20|48280695|48280727;LTR/ERVL-MaLR|MLT1N2|20|48281173|48281312	chr20	48280649	48282196	*	*	NA	NA	NA
transfb4ae09461d1eb0d	Testicular Germ Cell Tumors	Testis	Primary	17.3137	0.524626	1.35685	5	MEG3	LTR|LTR91A|14|100829097|100829404	chr14	100826074	100834653	+	+	ENSG00000214548.14	lincRNA	lincRNA
trans23ac7f8adf014b36	Glioblastoma Multiforme	Brain	Primary	0.556798	0.0135969	0.0359947	1	NA	LTR/ERVL-MaLR|MLT1J|20|48280695|48280727;LTR/ERVL-MaLR|MLT1N2|20|48281173|48281312	chr20	48280649	48282196	*	*	NA	NA	NA
trans2472346986efbd24	Esophageal Carcinoma	Esophagus	Primary	1.02131	0	0.0105181	5	RPE65	LTR/ERV1|HERVH-int~LTR7Y|1|68386004|68391994;LTR/ERV1|LTR17|1|68392098|68392789;LTR/ERVL-MaLR|MLT1N2|1|68451003|68451238	chr1	68388793	68452076	*	*	ENSG00000116745.6	protein_coding	protein_coding
transb89c2c5a90b057a2	Pheochromocytoma and Paraganglioma	Adrenal Gland	Primary	46.0693	5.01918	15.2213	4	XRCC6	LTR/ERVL|LTR50|22|41656680|41656850	chr22	41656508	41664040	+	+	ENSG00000196419.12	protein_coding	protein_coding
trans1db9e41c7d0353e9	Glioblastoma Multiforme	Brain	Primary	56.8487	6.97274	2.56296	3	LINC00396	LTR/ERV1|MER90|13|110036737|110036857;LTR/ERV1|LTR58|13|110056668|110057319	chr13	110036044	110057381	*	*	ENSG00000231428.2	lincRNA	lincRNA
trans2472346986efbd24	Head and Neck Squamous Cell Carcinoma	Head and Neck	Primary	1.30903	0	0.00374945	5	RPE65	LTR/ERV1|HERVH-int~LTR7Y|1|68386004|68391994;LTR/ERV1|LTR17|1|68392098|68392789;LTR/ERVL-MaLR|MLT1N2|1|68451003|68451238	chr1	68388793	68452076	*	*	ENSG00000116745.6	protein_coding	protein_coding
trans4569d8bc812d5598	Cholangiocarcinoma	Bile Duct	Primary	44.6503	9.94213	12.9828	5	CCL20	LTR/ERV1|LTR2C|2|227805691|227806180	chr2	227805946	227817535	+	+	ENSG00000115009.11	protein_coding	protein_coding
transfd6cb7795ea459ad	Esophageal Carcinoma	Esophagus	Primary	12.8928	0	0.185941	3	NA	LTR/ERV1|HERVH-int~LTR7Y|1|68386004|68391994	chr1	68386562	68388697	*	*	NA	NA	NA
trans9aaa87a49003bae7	Testicular Germ Cell Tumors	Testis	Primary	12.7199	0	0	2	MAML2	LTR/ERV1|LTR7Y|11|96180739|96181218	chr11	96180818	96181106	*	*	ENSG00000184384.13	protein_coding	protein_coding
trans24ff6d1064903314	Skin Cutaneous Melanoma	Skin	Primary	66.3036	0.772749	1.3968	8	RP13-735L24.1	LTR/ERV1|HERVE-int|12|9407305|9407906	chr12	9397063	9407568	-	-	ENSG00000260423.1	lincRNA	lincRNA
trans2597a81b1d7710ee	Prostate Adenocarcinoma	Prostate	Primary	19.1302	0.837936	3.68526	2	PRCAT47	LTR|LTR91|16|80828572|80828764;LTR|LTR91|16|80829038|80829523;LTR/ERVL-MaLR|MLT1C2|16|80830389|80830720	chr16	80828735	80840223	-	-	ENSG00000260896.5	lincRNA	lincRNA
transc1d3efc6553dcd55	Brain Lower Grade Glioma	Brain	Primary	13.3779	0.086193	0.30265	2	ZNF280D	LTR/ERVL-MaLR|MLT1L|15|56916698|56917113	chr15	56916696	56918557	*	*	ENSG00000137871.19	protein_coding	protein_coding
trans5f9b6c8a86d5e762	Testicular Germ Cell Tumors	Testis	Primary	29.8078	2.47511	6.74707	4	SPANXA2-OT1	LTR/ERV1|LTR17|X|141502748|141503604	chrX	141503095	141520519	+	+	ENSG00000277215.1	lincRNA	lincRNA
transc1df0f7064d07ef6	Stomach Adenocarcinoma	Stomach	Primary	58.5491	7.57174	1.03845	11	IDO1	LTR/ERV1|LTR48B~LTR49-int|8|39901784|39904186	chr8	39902035	39928732	+	+	ENSG00000131203.12	protein_coding	protein_coding
trans24ff6d1064903314	Uveal Melanoma	Eye	Primary	56.5603	0.772749	NA	8	RP13-735L24.1	LTR/ERV1|HERVE-int|12|9407305|9407906	chr12	9397063	9407568	-	-	ENSG00000260423.1	lincRNA	lincRNA
transdad017f2b36864c3	Stomach Adenocarcinoma	Stomach	Primary	12.5575	0	0.168034	2	NA	LTR/ERV1|HERVH-int~LTR7Y|19|43323511|43329384	chr19	43328297	43328582	*	*	NA	NA	NA
trans4eb85a0e1f89478d	Uveal Melanoma	Eye	Primary	20.3454	1.04195	NA	3	RP11-1055B8.2	LTR/ERVL|MLT2D|17|81375748|81376170	chr17	81369483	81379743	*	*	ENSG00000263154.1	lincRNA	lincRNA
trans250d49cc1e2fd542	Testicular Germ Cell Tumors	Testis	Primary	5.44144	0	0	5	AC226119.5	LTR/ERVL|MLT2A1|4|3921511|3921609;LTR/ERV1|HERVH-int~LTR7|4|3927446|3933080	chr4	3921583	3933039	*	*	ENSG00000253917.4	processed_transcript	processed_transcript
trans58253659a1428707	Testicular Germ Cell Tumors	Testis	Primary	12.508	0	0.242394	2	METTL20	LTR/ERV1|MER34D|12|31651632|31651758;LTR/ERV1|LTR9|12|31651759|31652361	chr12	31627546	31652047	*	*	ENSG00000139160.13	protein_coding	protein_coding
transc40e0980f3c2c12d	Prostate Adenocarcinoma	Prostate	Primary	28.7808	2.34531	6.77074	2	AQP4-AS1	LTR|LTR91A|18|26689887|26690183	chr18	26689353	26703672	*	*	ENSG00000260372.6	antisense	antisense
trans52ff54f40e589aed	Kidney Renal Papillary Cell Carcinoma	Kidney	Primary	33.4785	3.15293	7.84997	7	UGT2B7	LTR/ERV1|Harlequin-int~LTR2B|4|69050860|69051710	chr4	69051154	69112836	+	+	ENSG00000171234.13	protein_coding	protein_coding
transbaa8d81b0d6e4c54	Uterine Corpus Endometrial Carcinoma	Uterus	Primary	64.4679	8.94328	18.7901	2	C1orf186	LTR/ERV1|LTR2B|1|206052519|206053000;LTR/ERV1|Harlequin-int~LTR2B|1|206054886|206058912	chr1	206052624	206058864	*	*	ENSG00000263961.6	protein_coding	protein_coding
trans993d580434770915	Adrenocortical Carcinoma	Adrenal Gland	Primary	25.7215	1.91846	2.25772	5	SPINK13	LTR/ERVL|LTR79|5|148286111|148286608	chr5	148268781	148286254	+	+	ENSG00000214510.9	protein_coding	protein_coding
transc45ac756592d1852	Prostate Adenocarcinoma	Prostate	Primary	12.7206	0.0542013	1.68754	4	C1QTNF3-AMACR	LTR/ERVL|LTR33A|5|33986535|33986963;LTR/ERVL-MaLR|MLT1L|5|33988059|33988546	chr5	33985641	34004625	-	-	ENSG00000273294.1	protein_coding	nonsense_mediated_decay
transfc7e8cbef2abec56	Testicular Germ Cell Tumors	Testis	Primary	12.2152	0.0057352	0.0132466	2	NA	LTR/ERV1|HERVH-int~LTR7Y|8|90090224|90095426;LTR/ERV1|LTR7Y|8|90095435|90095868	chr8	90090761	90095472	*	*	NA	NA	NA
transb1421270f8cca6e2	Prostate Adenocarcinoma	Prostate	Primary	4.99409	0.168119	0.221253	3	AP006748.1	LTR/ERVL-MaLR|MLT1F2|21|41576176|41576646;LTR/ERVL-MaLR|MLT1L|21|41582341|41582818	chr21	41576140	41584173	*	*	ENSG00000223400.1	lincRNA	lincRNA
trans25bce55fda110513	Uveal Melanoma	Eye	Primary	4.52006	0	NA	3	NA	LTR/ERVL-MaLR|MLT1G1|4|169044807|169045078;LTR/ERVL-MaLR|MLT1J|4|169045746|169045874;LTR/ERVL|MER76|4|169045952|169046540;LTR/ERVL-MaLR|MLT1A0|4|169074137|169074398	chr4	169044757	169074316	*	*	NA	NA	NA
trans31db3baf6cb74910	Testicular Germ Cell Tumors	Testis	Primary	12.0785	0	0.0396011	2	NA	LTR/ERV1|LTR7Y|7|26024200|26024639;LTR/ERV1|HERVH-int|7|26024641|26029351	chr7	26024243	26025017	*	*	NA	NA	NA
trans2605c079a588dae2	Head and Neck Squamous Cell Carcinoma	Head and Neck	Primary	3.7687	0	0.328623	2	NA	LTR/ERV1|HERVH-int~LTR7Y|13|109265521|109271116	chr13	109266044	109266347	*	*	NA	NA	NA
trans76accbc863272209	Sarcoma	Soft Tissue	Primary	267.908	64.6784	NA	10	RP1-37C10.3	LTR/ERV1|LTR64|1|16981568|16981905	chr1	16974503	16981652	-	-	ENSG00000226526.1	antisense	antisense
trans0637729723453729	Lymphoid Neoplasm Diffuse Large B-cell Lymphoma	Lymph Nodes	Primary	12.0574	0.143133	0.461857	2	YWHAZ	LTR/ERV1|MER34B-int|8|100919659|100920019	chr8	100919656	100920205	*	*	ENSG00000164924.17	protein_coding	protein_coding
trans81057c08aba0eb98	Uterine Corpus Endometrial Carcinoma	Uterus	Primary	17.5289	5.00817	4.39852	3	NA	LTR/ERV1|HERV3-int|19|566440|567724;LTR/ERV1|HERVIP10B3-int~LTR10B2|19|571374|571897	chr19	566438	572450	-	-	NA	NA	NA
trans418ceb160aba5add	Uveal Melanoma	Eye	Primary	105.816	18.2301	NA	4	NA	LTR/ERVL-MaLR|THE1B|17|76564566|76564680	chr17	76557774	76564688	+	+	NA	NA	NA
trans2f40c5c9f3e9385e	Esophageal Carcinoma	Esophagus	Primary	11.9518	0	0.255931	2	NA	LTR/ERV1|HERVH-int~LTR7Y|1|68386004|68391994	chr1	68386357	68387072	*	*	NA	NA	NA
trans26a655f7c9bf176a	Testicular Germ Cell Tumors	Testis	Primary	5.87118	0	0.138912	2	NANOGP1	LTR/ERVL|LTR102_Mam|12|7799157|7799579;LTR/ERVL|LTR102_Mam|12|7906118|7906525	chr12	7799123	7906526	*	*	ENSG00000176654.12	transcribed_unprocessed_pseudogene	processed_transcript
transb606803a7fa055f3	Brain Lower Grade Glioma	Brain	Primary	21.927	1.86123	3.5334	6	KCNN3	LTR/ERVL-MaLR|MLT1I|1|154632069|154632439	chr1	154630944	154702723	*	*	ENSG00000143603.18	protein_coding	protein_coding
trans26cd58c846e29c2e	Lung Squamous Cell Carcinoma	Lung	Primary	4.181	0.95809	0.0329448	3	RNA5SP99	LTR/ERV1|LTR2752|2|81481148|81482372	chr2	81481414	81570561	*	*	ENSG00000200890.1	rRNA	rRNA
transb9ddd7ff2f697e12	Skin Cutaneous Melanoma	Skin	Primary	1.68629	0.0733138	0.00605432	5	BCAS3	LTR/ERV1|LTR12|17|61237098|61237650;LTR/ERVL-MaLR|THE1C|17|61244999|61245371	chr17	61232339	61392830	*	+	ENSG00000141376.20	protein_coding	protein_coding
trans268f55184cda0090	Testicular Germ Cell Tumors	Testis	Primary	16.7217	0.690104	1.45528	2	AP001065.15	LTR/ERV1|HUERS-P2-int~LTR1A2|21|44485340|44491111	chr21	44485678	44491141	*	*	ENSG00000228709.1	lincRNA	lincRNA
transa6558c355ce29e6c	Prostate Adenocarcinoma	Prostate	Primary	28.5698	0.227519	0.223052	1	C1QTNF3-AMACR	LTR/ERVK|MER11A|5|34010063|34010460	chr5	34005824	34010285	*	*	ENSG00000273294.1	protein_coding	nonsense_mediated_decay
trans60a58daa1aaec6de	Uveal Melanoma	Eye	Primary	13.1707	0.190787	NA	2	NA	LTR/ERVL-MaLR|MLT1C2|8|53913412|53913861	chr8	53879787	53913809	*	*	NA	NA	NA
trans5afadc13de7251bc	Testicular Germ Cell Tumors	Testis	Primary	15.8664	0.570456	0	3	AC092057.1	LTR/ERV1|HERVH-int~LTR7|3|54634484|54640204	chr3	54631173	54639892	*	*	ENSG00000276927.1	miRNA	miRNA
trans5b483426c583a54f	Ovarian Serous Cystadenocarcinoma	Ovary	Primary	12.3698	0.087091	0.930251	8	RP1-37C10.3	LTR/ERV1|LTR64|1|16981568|16981905	chr1	16975269	16981652	-	-	ENSG00000226526.1	antisense	antisense
trans2864b0c5491ab4c1	Thymoma	Thymus	Primary	2.67485	0	0	3	HLA-DPB2	LTR/ERV1|HUERS-P3b-int~LTR9C|6|33117740|33118640;LTR/ERV1|HUERS-P3b-int|6|33119104|33121937;LTR/ERV1|HUERS-P3b-int~LTR9C|6|33122933|33125003	chr6	33117823	33124594	*	*	ENSG00000224557.7	transcribed_unprocessed_pseudogene	processed_transcript
trans2897f61e6a313458	Glioblastoma Multiforme	Brain	Primary	46.2364	7.47818	11.2154	9	WSCD1	LTR/ERVL-MaLR|MLT1K|17|6123957|6124465	chr17	6070484	6124427	+	+	ENSG00000179314.13	protein_coding	protein_coding
transefa254304db02f03	Uveal Melanoma	Eye	Primary	16.2433	0.633285	NA	2	NA	LTR/ERV1|LTR2|14|33963270|33963707	chr14	33963315	33973781	*	*	NA	NA	NA
trans5e567f4b83146d24	Liver Hepatocellular Carcinoma	Liver	Primary	23.5637	1.77153	5.33211	12	WDR13	LTR/ERVL|LTR75|X|48589882|48590356	chrX	48589971	48622012	+	+	ENSG00000101940.17	protein_coding	protein_coding
trans40c7d29f93199f6e	Testicular Germ Cell Tumors	Testis	Primary	14.435	0.382564	0.643097	2	ERVW-1	LTR/ERV1|HERV17-int~LTR17|7|92467971|92475579;LTR/ERV1|LTR17|7|92477413|92478192	chr7	92468923	92477849	*	*	ENSG00000242950.6	protein_coding	protein_coding
trans35690778b01f14c0	Uveal Melanoma	Eye	Primary	33.6711	3.54049	NA	10	NSG1	LTR/ERV1|LTR12|4|4348399|4349146	chr4	4348297	4419057	+	+	ENSG00000168824.14	protein_coding	protein_coding
trans8639010506f790b6	Lymphoid Neoplasm Diffuse Large B-cell Lymphoma	Lymph Nodes	Primary	18.6558	1.00997	0.738727	12	SCARNA16	LTR/ERV1|MER4B|1|9085179|9085738	chr1	9036879	9085279	-	-	ENSG00000252404.1	scaRNA	scaRNA
trans584903f96f65325e	Testicular Germ Cell Tumors	Testis	Primary	11.5919	0	0.0457987	2	NA	LTR/ERV1|HERVH-int~LTR7Y|5|117046415|117051080;LTR/ERV1|HERVH-int~LTR7Y|5|117051083|117052246	chr5	117046588	117051744	*	*	NA	NA	NA
transd708e95747601ae5	Testicular Germ Cell Tumors	Testis	Primary	11.5568	0	0.156692	2	RP11-596D21.1	LTR/ERV1|MER34A|14|31244656|31244962	chr14	31244736	31255130	*	*	ENSG00000257831.1	antisense	antisense
trans11771b6cdaefebdd	Uveal Melanoma	Eye	Primary	15.8577	0.603465	NA	4	RP11-3M1.1	LTR/ERVL-MaLR|MLT1K|16|48166032|48166576	chr16	48164824	48192348	*	*	ENSG00000261538.1	sense_overlapping	sense_overlapping
trans119efff65676bb59	Testicular Germ Cell Tumors	Testis	Primary	19.7595	1.32055	1.71487	2	LINC01160	LTR/ERVL|MER21B|1|111599505|111599754;LTR/ERVL-MaLR|MSTB|1|111599755|111600184	chr1	111589851	111599815	*	*	ENSG00000231346.5	lincRNA	lincRNA
trans4e063e2ceedb27fd	Testicular Germ Cell Tumors	Testis	Primary	17.5946	0	0.0280105	13	CALB1	LTR/ERV1|HERVH-int~LTR7Y|8|90090224|90095426	chr8	90058610	90091580	-	-	ENSG00000104327.7	protein_coding	protein_coding
trans29fa75a2f9189d8d	Kidney Renal Clear Cell Carcinoma	Kidney	Primary	93.1677	16.2057	12.4783	2	OR2I1P	LTR/ERV1|MER57F|6|29552528|29552933	chr6	29552554	29559936	*	*	ENSG00000237988.3	unprocessed_pseudogene	unprocessed_pseudogene
trans3b642ebf6688558e	Skin Cutaneous Melanoma	Skin	Primary	12.0047	0.076281	0	4	CSAG1	LTR/ERVL|MLT2C2|X|152728209|152728479	chrX	152727492	152733749	-	-	ENSG00000198930.12	protein_coding	protein_coding
trans6e8321bc81461e21	Esophageal Carcinoma	Esophagus	Primary	1.10811	0.0527438	0.311056	3	CAB39	LTR/ERVL-MaLR|MSTB2|2|230750142|230750503;LTR/ERVL-MaLR|MSTD|2|230752319|230752668	chr2	230748956	230763404	*	-	ENSG00000135932.10	protein_coding	protein_coding
transf05b8c55e92c251b	Testicular Germ Cell Tumors	Testis	Primary	12.5432	0.15192	0.146069	2	NA	LTR/ERV1|HERVH-int~LTR7Y|19|36155475|36161023	chr19	36155532	36159883	*	*	NA	NA	NA
transf5463099fed89a2d	Bladder Urothelial Carcinoma	Bladder	Primary	74.6624	12.1099	9.34198	2	NA	LTR/ERV1|HERV30-int~LTR30|10|53025174|53026354;LTR/ERV1|HERV30-int~LTR30|10|53026355|53030661	chr10	53025291	53030136	*	*	NA	NA	NA
trans4e7a9d065ba5fa31	Uterine Carcinosarcoma	Uterus	Primary	2.70095	0	0	4	CCDC144NL-AS1	LTR/ERVL-MaLR|MLT1L|17|20924184|20924497	chr17	20868464	20930039	+	+	ENSG00000233098.8	antisense	antisense
transf4d26758ee34965b	Breast Invasive Carcinoma	Breast	Primary	208.735	45.6499	35.2099	4	VPS13B	LTR/ERV1|LTR23|8|99892051|99892180	chr8	99877116	99894055	-	-	ENSG00000132549.18	protein_coding	protein_coding
trans30f8b645f0d34ae9	Esophageal Carcinoma	Esophagus	Primary	1.36552	9.18802e-06	0.00477438	19	CBX3	LTR/ERVL-MaLR|MLT1F|7|26188946|26189142	chr7	26152202	26212606	*	*	ENSG00000122565.18	protein_coding	protein_coding
transfe7942292326f669	Kidney Renal Papillary Cell Carcinoma	Kidney	Primary	31.4961	3.30351	6.13102	4	C1orf186	LTR/ERV1|LTR2B|1|206052519|206053000	chr1	206052822	206061896	*	*	ENSG00000263961.6	protein_coding	protein_coding
transab76e14091f69883	Testicular Germ Cell Tumors	Testis	Primary	13.3783	0.292024	0.762252	4	AC078899.3	LTR/ERV1|LTR70|19|20220441|20221668;LTR/ERV1|HERVE_a-int~LTR2|19|20243740|20248490;LTR/ERV1|LTR70|19|20415015|20416290	chr19	20220452	20417689	*	*	ENSG00000269274.1	unprocessed_pseudogene	unprocessed_pseudogene
transc271e38d36e05341	Testicular Germ Cell Tumors	Testis	Primary	14.112	0.401581	0.658177	3	NA	LTR/ERV1|HERVH-int~LTR7|2|76573625|76579704	chr2	76575109	76589961	*	*	NA	NA	NA
trans2fd827f17dccfdb0	Head and Neck Squamous Cell Carcinoma	Head and Neck	Primary	22.1444	1.67174	0.301009	2	RP4-620F22.2	LTR/ERV1|LTR12C|1|89272453|89273890	chr1	89269385	89272931	*	*	ENSG00000237568.1	antisense	antisense
trans853065c18a87a2f5	Mesothelioma	Pleura	Primary	20.4446	1.3982	NA	2	CH17-360D5.2	LTR/ERVL-MaLR|MLT1D|10|47957574|47958085	chr10	47957649	47985907	*	*	ENSG00000276850.4	lincRNA	lincRNA
trans567eb8947a68cf31	Brain Lower Grade Glioma	Brain	Primary	18.2496	1.05077	1.75897	15	ADGRG1	LTR/ERV1|LTR78B|16|57665497|57666359	chr16	57639028	57665566	+	+	ENSG00000205336.11	protein_coding	protein_coding
trans76accbc863272209	Uterine Corpus Endometrial Carcinoma	Uterus	Primary	251.54	64.6784	62.6324	10	RP1-37C10.3	LTR/ERV1|LTR64|1|16981568|16981905	chr1	16974503	16981652	-	-	ENSG00000226526.1	antisense	antisense
trans291961f6f9d96461	Testicular Germ Cell Tumors	Testis	Primary	4.13805	0.0060534	0	2	NA	LTR/ERV1|HERVH-int~LTR7|5|76357256|76362624	chr5	76357830	76359759	*	*	NA	NA	NA
transa5fc074870096182	Lung Squamous Cell Carcinoma	Lung	Primary	87.1094	15.36	2.01102	5	NTS	LTR/ERVL-MaLR|THE1B|12|85855752|85856110	chr12	85855934	85882985	+	+	ENSG00000133636.10	protein_coding	protein_coding
trans6e40be93eae1aaa4	Testicular Germ Cell Tumors	Testis	Primary	34.7907	4.03123	3.96692	7	RP11-627K11.3	LTR/ERV1|PRIMA4-int|12|31304738|31305696	chr12	31280380	31326336	-	-	ENSG00000256176.1	processed_pseudogene	processed_pseudogene
trans88c0d9be1e6199c5	Glioblastoma Multiforme	Brain	Primary	11.4511	0.0534693	0.0282082	2	GNG12-AS1	LTR/ERVL|LTR16C|1|68119487|68119775;LTR?|MamRep605b|1|68121907|68122233	chr1	68119004	68125383	*	*	ENSG00000232284.7	antisense	antisense
trans31268d5db643f752	Uveal Melanoma	Eye	Primary	12.3597	0.184457	NA	2	RGS20	LTR/ERVL-MaLR|MLT1C2|8|53913412|53913861	chr8	53880851	53913809	*	*	ENSG00000147509.13	protein_coding	protein_coding
trans84c25a72ca224174	Lymphoid Neoplasm Diffuse Large B-cell Lymphoma	Lymph Nodes	Primary	44.1043	5.90081	0.662767	7	SLAMF8	LTR/ERVL-MaLR|MLT1G3|1|159836232|159836385	chr1	159826694	159854920	*	*	ENSG00000158714.10	protein_coding	protein_coding
trans29432b987ee422c7	Brain Lower Grade Glioma	Brain	Primary	5.41695	0.248168	0.57874	1	NKAIN3	LTR/ERVL-MaLR|MLT1J|8|62970912|62971355;LTR/ERVL-MaLR|MLT1J|8|62971642|62971712	chr8	62970250	62972212	*	*	ENSG00000185942.11	protein_coding	protein_coding
trans2951008f2ff3db3d	Testicular Germ Cell Tumors	Testis	Primary	25.9964	0	0.397874	3	AC226119.5	LTR/ERV1|HERVH-int~LTR7|4|3927446|3933080	chr4	3927472	3932682	*	*	ENSG00000253917.4	processed_transcript	processed_transcript
transffaf93698082ff77	Prostate Adenocarcinoma	Prostate	Primary	13.7902	0.419371	0.528993	2	PCAT14	LTR/ERVK|HERVK-int~LTR5B|22|23537740|23546004;LTR/ERVK|LTR5B|22|23546583|23546900	chr22	23537767	23546787	*	*	ENSG00000280623.1	lincRNA	lincRNA
transbca1b29b0b05a399	Glioblastoma Multiforme	Brain	Primary	31.2166	3.38894	8.96774	2	CX3CR1	LTR/ERVL-MaLR|MLT1K|3|39264800|39265214	chr3	39263496	39280105	*	*	ENSG00000168329.13	protein_coding	protein_coding
transbad40d190b389a5f	Adrenocortical Carcinoma	Adrenal Gland	Primary	68.752	11.2593	15.3681	3	AKAP9	LTR/ERVL?|LTR89B|7|92110952|92111253;LTR/ERVL?|LTR89B|7|92111546|92111799	chr7	92109761	92125855	*	*	ENSG00000127914.16	protein_coding	protein_coding
trans9d7a560aadaa91ab	Brain Lower Grade Glioma	Brain	Primary	16.6487	0.844438	2.71665	7	GALNT13	LTR/ERV1|LTR12D|2|153871945|153872416	chr2	153872263	154245983	+	+	ENSG00000144278.14	protein_coding	protein_coding
trans62d3e8f65c3b5bdb	Testicular Germ Cell Tumors	Testis	Primary	13.7339	0.407592	0.633862	2	CLEC12A	LTR/ERV1|LOR1-int|12|9955387|9955637;LTR/ERV1|LOR1-int|12|9956196|9956465;LTR/ERV1|LOR1-int|12|9956475|9957026	chr12	9947682	9956985	*	*	ENSG00000172322.13	protein_coding	protein_coding
trans65e8fdac28d96489	Testicular Germ Cell Tumors	Testis	Primary	16.3131	0.807331	1.52379	2	RIMKLB	LTR/ERV1|MER41A|12|8679820|8680161	chr12	8679866	8755027	*	*	ENSG00000166532.15	protein_coding	protein_coding
trans296918219b186b21	Head and Neck Squamous Cell Carcinoma	Head and Neck	Primary	1.76743	0	0.0928513	3	NA	LTR/ERVL|ERV3-16A3_I-int~ERV3-16A3_LTR|22|34674246|34675925	chr22	34674183	34684794	*	*	NA	NA	NA
trans4b94d1dc6bdfa52e	Cervical Squamous Cell Carcinoma and Endocervical Adenocarcinoma	Cervix	Primary	41.7532	5.52897	0.873056	3	S100A7	LTR/ERVL-MaLR|THE1A|1|153506015|153506369	chr1	153457609	153506160	-	-	ENSG00000143556.8	protein_coding	protein_coding
trans35690778b01f14c0	Skin Cutaneous Melanoma	Skin	Primary	31.7017	3.54049	2.45389	10	NSG1	LTR/ERV1|LTR12|4|4348399|4349146	chr4	4348297	4419057	+	+	ENSG00000168824.14	protein_coding	protein_coding
trans296918219b186b21	Lung Squamous Cell Carcinoma	Lung	Primary	0.741403	0	0	3	NA	LTR/ERVL|ERV3-16A3_I-int~ERV3-16A3_LTR|22|34674246|34675925	chr22	34674183	34684794	*	*	NA	NA	NA
trans2979353c7f9f1156	Rectum Adenocarcinoma	Colorectal	Primary	1.01558	0	0	5	AC123023.1	LTR/ERVL-MaLR|THE1D|3|34184557|34184932	chr3	34184743	34206685	*	*	ENSG00000236452.1	lincRNA	lincRNA
trans0141e3208a398c3b	Kidney Renal Clear Cell Carcinoma	Kidney	Primary	16.2102	0.818837	0.390649	2	UBE2D2	LTR/ERV1|Harlequin-int~LTR2B|5|139526721|139531564	chr5	139527878	139535164	*	*	ENSG00000131508.15	protein_coding	protein_coding
trans7fbdff6e0198ab92	Uterine Corpus Endometrial Carcinoma	Uterus	Primary	445.012	117.407	144.29	5	LY6E	LTR/ERVL|MER21A|8|143016840|143017196	chr8	143016943	143022408	+	+	ENSG00000160932.10	protein_coding	protein_coding
trans78034124bcd32d6a	Kidney Renal Papillary Cell Carcinoma	Kidney	Primary	11.7417	0.143269	3.52601	2	RP11-44D5.1	LTR/ERVK|MER11B|3|15738768|15739435	chr3	15661021	15740963	*	*	ENSG00000270409.1	transcribed_unprocessed_pseudogene	transcribed_unprocessed_pseudogene
trans3baa471a56bd5524	Uveal Melanoma	Eye	Primary	11.9315	0.171578	NA	3	AL590226.1	LTR/ERV1|MER51B|9|136693088|136693434	chr9	136693177	136697692	*	*	ENSG00000221693.1	miRNA	miRNA
transc1df0f7064d07ef6	Cervical Squamous Cell Carcinoma and Endocervical Adenocarcinoma	Cervix	Primary	50.6183	7.57174	3.31964	11	IDO1	LTR/ERV1|LTR48B~LTR49-int|8|39901784|39904186	chr8	39902035	39928732	+	+	ENSG00000131203.12	protein_coding	protein_coding
trans298b4f035966c25f	Uveal Melanoma	Eye	Primary	2.46716	0.181058	NA	2	NA	LTR/ERVL|LTR66|1|214859637|214860130	chr1	214847545	214859880	*	*	NA	NA	NA
transcd389d9ab5403c0f	Ovarian Serous Cystadenocarcinoma	Ovary	Primary	156.915	33.9852	28.9451	2	AP000350.10	LTR/ERVL-MaLR|MLT1E1|22|23891139|23891668;LTR/ERV1|LTR19A|22|23892306|23892720	chr22	23891185	23895173	*	*	ENSG00000251357.4	protein_coding	protein_coding
trans3f56c5450a3e1395	Brain Lower Grade Glioma	Brain	Primary	13.2606	0.385927	3.11269	2	NEU4	LTR/ERV1|PABL_A|2|241808249|241808863	chr2	241807939	241809368	*	*	ENSG00000204099.11	protein_coding	protein_coding
transfbb8809e0189d3a4	Lymphoid Neoplasm Diffuse Large B-cell Lymphoma	Lymph Nodes	Primary	11.7342	0.15924	3.4948	3	RP11-567J20.3	LTR/ERVL-MaLR|THE1A|8|48517924|48518278	chr8	48515855	48518216	*	*	ENSG00000253140.1	lincRNA	lincRNA
trans3a3e4b1eafbea956	Pheochromocytoma and Paraganglioma	Adrenal Gland	Primary	24.2524	2.26937	3.70633	2	TRPV4	LTR/ERVL-MaLR|MLT1H|12|109777723|109777875	chr12	109777592	109799957	*	*	ENSG00000111199.10	protein_coding	protein_coding
transf27c4d5024d0f06d	Brain Lower Grade Glioma	Brain	Primary	14.0938	0.525784	1.66088	3	FLJ16779	LTR/ERVL-MaLR|MLT1C2|20|63258112|63258463	chr20	63254658	63258779	*	*	ENSG00000275620.1	antisense	antisense
transef3eba9d94454a02	Uveal Melanoma	Eye	Primary	12.3837	0.263114	NA	4	RP11-1055B8.3	LTR/ERVL|MLT2D|17|81375748|81376170	chr17	81376151	81381889	-	-	ENSG00000262223.6	lincRNA	lincRNA
transab455da7883e3ecd	Head and Neck Squamous Cell Carcinoma	Head and Neck	Primary	278.985	68.7362	43.445	5	IFI27	LTR?|Eutr5|14|94110371|94110617	chr14	94110536	94116695	+	+	ENSG00000165949.12	protein_coding	protein_coding
trans29cbd5cb6b98bef1	Lymphoid Neoplasm Diffuse Large B-cell Lymphoma	Lymph Nodes	Primary	5.3589	0.230901	0.44349	5	NA	LTR/ERVL-MaLR|MLT1A1|2|142865357|142865823;LTR/ERV1|LTR27E|2|142869364|142869554	chr2	142865536	142871573	*	*	NA	NA	NA
trans92e8479ebc822ae7	Skin Cutaneous Melanoma	Skin	Primary	42.127	0.0833071	0.685225	2	CDH4	LTR/ERVL-MaLR|THE1A|20|61754916|61755267	chr20	61738201	61755164	*	-	ENSG00000179242.15	protein_coding	protein_coding
trans92e8479ebc822ae7	Uveal Melanoma	Eye	Primary	17.5719	0.0833071	NA	2	CDH4	LTR/ERVL-MaLR|THE1A|20|61754916|61755267	chr20	61738201	61755164	*	-	ENSG00000179242.15	protein_coding	protein_coding
transfbbfcf07e8e0ba42	Pheochromocytoma and Paraganglioma	Adrenal Gland	Primary	118.79	24.4084	3.4498	12	SCG3	LTR/ERV1|LTR12F|15|51720625|51721139	chr15	51680799	51721025	+	+	ENSG00000104112.8	protein_coding	protein_coding
transe7e33abbe3d42246	Pheochromocytoma and Paraganglioma	Adrenal Gland	Primary	87.7983	16.616	4.16111	11	UCHL1	LTR/ERVL|MLT2A2|4|41268745|41269252	chr4	41248247	41268888	+	+	ENSG00000154277.12	protein_coding	protein_coding
trans47ff83528fed13dc	Pheochromocytoma and Paraganglioma	Adrenal Gland	Primary	57.1305	9.33583	1.02563	6	SLC22A17	LTR/ERVL-MaLR|MLT1N2|14|23345901|23346037	chr14	23346001	23349293	-	-	ENSG00000092096.14	protein_coding	protein_coding
transb47138a3b9dabec9	Testicular Germ Cell Tumors	Testis	Primary	10.3652	0	0.644667	2	IL34	LTR/ERV1|HERVH-int~LTR7|16|70616524|70622062;LTR/ERV1|HERVH-int~LTR7Y|16|70622063|70626119	chr16	70621506	70626120	*	*	ENSG00000157368.10	protein_coding	protein_coding
transb14da1cd5997ac2d	Glioblastoma Multiforme	Brain	Primary	1.5023	0.0361718	0	4	CHRNA9	LTR/ERVL-MaLR|MLT1N2|4|40347889|40348121	chr4	40335656	40355303	+	+	ENSG00000174343.5	protein_coding	protein_coding
transa82055ea7babe218	Pheochromocytoma and Paraganglioma	Adrenal Gland	Primary	8.69684	0.324682	0.202894	3	CFAP61	LTR/ERVL-MaLR|MLT1G3|20|20277584|20278091	chr20	20270834	20277653	*	-	ENSG00000089101.17	protein_coding	protein_coding
trans791a2a3c1840668f	Kidney Renal Papillary Cell Carcinoma	Kidney	Primary	8.12445	0.354751	0.972631	4	CRLS1	LTR/ERVL-MaLR|MLT1C2|20|6039583|6040030	chr20	6039281	6054638	-	-	ENSG00000088766.11	protein_coding	protein_coding
trans3296c3bd094f60d2	Esophageal Carcinoma	Esophagus	Primary	25.0458	2.53851	3.38476	5	KRBOX1	LTR/ERV1|MER39|3|42809253|42809581	chr3	42784094	42809494	-	-	ENSG00000240747.7	protein_coding	protein_coding
trans16cb9e3d5da28be8	Rectum Adenocarcinoma	Colorectal	Primary	126.497	27.8066	30.5347	3	RBCK1	LTR/ERVL-MaLR|MLT1J|20|410265|410665	chr20	408031	410763	+	+	ENSG00000125826.19	protein_coding	protein_coding
trans749199973bd5a6d9	Skin Cutaneous Melanoma	Skin	Primary	39.7675	5.59762	5.59372	9	TBC1D16	LTR/ERVL-MaLR|MLT1H|17|79938643|79939068	chr17	79937085	79952005	-	-	ENSG00000167291.15	protein_coding	protein_coding
trans0bdc237de5c997f2	Ovarian Serous Cystadenocarcinoma	Ovary	Primary	118.928	25.0728	16.7914	5	RP11-514P8.7	LTR/ERVL-MaLR|MSTA|7|102566918|102567301	chr7	102566963	102572547	-	-	ENSG00000270249.1	protein_coding	protein_coding
trans2b9001244e654688	Ovarian Serous Cystadenocarcinoma	Ovary	Primary	1.54061	0.0505688	0.0676857	2	NA	LTR/ERV1|LTR2B|6|111290145|111290629	chr6	111288310	111290323	*	*	NA	NA	NA
trans2bfc38c5d6da1e05	Thyroid Carcinoma	Thyroid	Primary	1.85482	0.0358816	0.170639	5	NA	LTR/ERVL-MaLR|MLT1J|1|115543204|115543689	chr1	115505382	115556525	*	*	NA	NA	NA
trans0637729723453729	Ovarian Serous Cystadenocarcinoma	Ovary	Primary	10.1503	0.143133	0	2	YWHAZ	LTR/ERV1|MER34B-int|8|100919659|100920019	chr8	100919656	100920205	*	*	ENSG00000164924.17	protein_coding	protein_coding
transfe685227d08869e4	Brain Lower Grade Glioma	Brain	Primary	10.8545	0.113194	1.64118	2	TCEB1P18	LTR/ERV1|LTR17|1|68392098|68392789	chr1	68366462	68392536	*	*	ENSG00000237622.1	processed_pseudogene	processed_pseudogene
trans2c2de4929c80aad4	Kidney Renal Papillary Cell Carcinoma	Kidney	Primary	5.97271	0	0	2	NA	LTR/ERV1|LTR2B|13|22880290|22880761;LTR/ERV1|Harlequin-int~LTR2B|13|22883560|22889835	chr13	22880333	22883979	*	*	NA	NA	NA
transd532c5d9e03f3044	Prostate Adenocarcinoma	Prostate	Primary	4.718	0.0995923	0.563919	1	COMT	LTR/ERVK|HERVK11-int|22|19940268|19940687	chr22	19940268	19941724	*	+	ENSG00000093010.11	protein_coding	protein_coding
transbb055c21fb9c5f4c	Head and Neck Squamous Cell Carcinoma	Head and Neck	Primary	12.9813	0.451408	0.68816	2	RP11-54H7.4	LTR/ERV1|HERVH-int~LTR7Y|13|109265521|109271116	chr13	109266393	109275084	*	*	ENSG00000275216.1	lincRNA	lincRNA
trans2c767245a9555ada	Lymphoid Neoplasm Diffuse Large B-cell Lymphoma	Lymph Nodes	Primary	3.93438	0	0	2	MIR3681HG	LTR/ERVL|ERV3-16A3_I-int|2|11865438|11865888;LTR/ERVL|LTR16A1|2|11865942|11866327	chr2	11853169	11866283	*	*	ENSG00000224184.5	lincRNA	lincRNA
trans03c554bc64386317	Kidney Renal Papillary Cell Carcinoma	Kidney	Primary	30.6989	3.80102	6.42026	5	C1orf186	LTR/ERV1|Harlequin-int~LTR2B|1|206054886|206058912	chr1	206035113	206061911	*	*	ENSG00000263961.6	protein_coding	protein_coding
trans0c954c81f9904006	Lymphoid Neoplasm Diffuse Large B-cell Lymphoma	Lymph Nodes	Primary	27.7654	3.22135	1.85279	2	APOBEC3C	LTR/ERV1|MER49|22|39020095|39020372	chr22	39016316	39020351	*	*	ENSG00000244509.3	protein_coding	protein_coding
trans2c937382b3f7a266	Kidney Renal Clear Cell Carcinoma	Kidney	Primary	10.4204	0.129282	0.281666	1	ENPP3	LTR/ERVL-MaLR|MLT1N2|6|131702094|131702203	chr6	131702159	131702904	*	*	ENSG00000154269.14	protein_coding	protein_coding
trans456b7767c247a13c	Ovarian Serous Cystadenocarcinoma	Ovary	Primary	111.856	23.7686	12.2066	3	HIST1H4I	LTR/ERV1|LTR48B|6|27138224|27138814	chr6	27138370	27146037	*	*	ENSG00000276180.1	protein_coding	protein_coding
transbe8aec08a2cc9cba	Liver Hepatocellular Carcinoma	Liver	Primary	13.2957	0.529235	1.93462	4	U8	LTR/ERVL-MaLR|MSTA-int|10|5016141|5018153	chr10	5001556	5018070	-	-	ENSG00000239148.1	snoRNA	snoRNA
transab455da7883e3ecd	Ovarian Serous Cystadenocarcinoma	Ovary	Primary	266.466	68.7362	14.0059	5	IFI27	LTR?|Eutr5|14|94110371|94110617	chr14	94110536	94116695	+	+	ENSG00000165949.12	protein_coding	protein_coding
trans47e5ddcd89fac06e	Cholangiocarcinoma	Bile Duct	Primary	33.2877	9.96386	8.18337	5	CCL20	LTR/ERV1|LTR2C|2|227805691|227806180	chr2	227805946	227817535	+	+	ENSG00000115009.11	protein_coding	protein_coding
trans674c073e2ef80ade	Glioblastoma Multiforme	Brain	Primary	15.9095	2.80902	2.28527	7	AC078842.4	LTR/ERV1|MER41B|7|137345641|137346278	chr7	137227206	137345879	-	-	ENSG00000231114.1	lincRNA	lincRNA
trans2ec8a073913de93d	Testicular Germ Cell Tumors	Testis	Primary	14.1106	0.683211	1.38375	7	RP11-713C19.1	LTR/ERVL-MaLR|MLT1A0|4|188098201|188098522	chr4	188091248	188109662	-	-	ENSG00000241011.1	processed_pseudogene	processed_pseudogene
trans456b7767c247a13c	Esophageal Carcinoma	Esophagus	Primary	110.808	23.7686	16.552	3	HIST1H4I	LTR/ERV1|LTR48B|6|27138224|27138814	chr6	27138370	27146037	*	*	ENSG00000276180.1	protein_coding	protein_coding
trans853a1367a15feabe	Mesothelioma	Pleura	Primary	12.0604	0.350029	NA	2	RP11-54H7.4	LTR/ERV1|LTR7Y|13|109264649|109265089;LTR/ERV1|LTR7Y|13|109265090|109265520;LTR/ERV1|HERVH-int~LTR7Y|13|109265521|109271116	chr13	109265052	109271076	*	*	ENSG00000275216.1	lincRNA	lincRNA
trans4a62be7377242078	Testicular Germ Cell Tumors	Testis	Primary	16.5812	1.13034	2.16392	3	NA	LTR/Gypsy|MamGypLTR1c|7|77514580|77515103;LTR/ERVL-MaLR|MLT1F|7|77515106|77515621	chr7	77515088	77534456	*	*	NA	NA	NA
trans0ab2c5d89afaf1c6	Lymphoid Neoplasm Diffuse Large B-cell Lymphoma	Lymph Nodes	Primary	14.0191	0.680145	0.791325	3	RNU6-475P	LTR/ERV1|LTR12F|6|114997820|114998372;LTR/ERV1|HERV17-int~LTR12F|6|114998386|115002374	chr6	114822955	115002282	*	*	ENSG00000251882.1	snRNA	snRNA
transfb51142ed355ed28	Ovarian Serous Cystadenocarcinoma	Ovary	Primary	17.4785	1.2971	0	3	NA	LTR|MamRep1527|10|84165054|84165868;LTR/ERV1|LTR2B|10|84167188|84167669;LTR/ERV1|Harlequin-int|10|84168503|84170027;LTR/ERV1|LTR2B|10|84171987|84172465	chr10	84164688	84172137	*	*	NA	NA	NA
trans853a1367a15feabe	Cervical Squamous Cell Carcinoma and Endocervical Adenocarcinoma	Cervix	Primary	12.0181	0.350029	1.82868	2	RP11-54H7.4	LTR/ERV1|LTR7Y|13|109264649|109265089;LTR/ERV1|LTR7Y|13|109265090|109265520;LTR/ERV1|HERVH-int~LTR7Y|13|109265521|109271116	chr13	109265052	109271076	*	*	ENSG00000275216.1	lincRNA	lincRNA
trans2d185900f3585203	Esophageal Carcinoma	Esophagus	Primary	1.60217	0.0640746	0.115602	1	EPSTI1	LTR/ERVL|MER21C|13|42986772|42987351;LTR|LTR91A|13|42987990|42988187	chr13	42986776	42988525	*	*	ENSG00000133106.14	protein_coding	protein_coding
transe5d189d7ef1d23a7	Kidney Renal Papillary Cell Carcinoma	Kidney	Primary	31.2395	4.08042	9.01984	2	UGT2B11	LTR/ERV1|Harlequin-int~LTR2B|4|69050860|69051710;LTR/ERV1|HERV3-int|4|69058437|69063049	chr4	69051563	69063075	*	*	ENSG00000213759.8	protein_coding	protein_coding
transb0e0a1300612cc6e	Skin Cutaneous Melanoma	Skin	Metastasis	26.7956	3.14848	0	5	AF277315.13	LTR/ERV1|LOR1b|X|154654643|154655089	chrX	154651978	154655242	-	-	ENSG00000226141.1	unprocessed_pseudogene	unprocessed_pseudogene
trans2d185900f3585203	Stomach Adenocarcinoma	Stomach	Primary	1.66147	0.0640746	0.219837	1	EPSTI1	LTR/ERVL|MER21C|13|42986772|42987351;LTR|LTR91A|13|42987990|42988187	chr13	42986776	42988525	*	*	ENSG00000133106.14	protein_coding	protein_coding
trans6307fb5c7c3431ae	Cholangiocarcinoma	Bile Duct	Primary	93.0024	19.2407	3.64065	2	NA	LTR/ERVL-MaLR|MLT1D|2|91545560|91545960	chr2	91545837	91546138	*	*	NA	NA	NA
transc66b1eb2952da9ca	Kidney Renal Clear Cell Carcinoma	Kidney	Primary	31.5555	4.17863	0.367412	9	GATM-AS1	LTR/ERVL|MER21C|15|45397086|45398013	chr15	45361560	45397382	-	-	ENSG00000275672.1	antisense	antisense
trans9d68bf9d9365cbbe	Lung Squamous Cell Carcinoma	Lung	Primary	9.69601	0	0	2	NA	LTR/ERV1|HERVH-int~LTR7Y|5|136540943|136541750;LTR/ERV1|HERVH-int~LTR7Y|5|136546329|136547136	chr5	136541211	136547125	*	*	NA	NA	NA
trans03101fc7246cd586	Mesothelioma	Pleura	Primary	28.2381	3.48442	NA	19	MSLN	LTR/ERVL|MER54B|16|760973|761306	chr16	759956	768861	+	+	ENSG00000102854.14	protein_coding	protein_coding
trans61f4fe8ea969fedc	Testicular Germ Cell Tumors	Testis	Primary	36.9067	5.37258	1.76198	2	TSPAN9	LTR/Gypsy?|LTR85a|12|3045384|3045472	chr12	3044972	3106794	*	*	ENSG00000011105.11	protein_coding	protein_coding
trans2d1930da2e62f90e	Kidney Renal Papillary Cell Carcinoma	Kidney	Primary	1.40646	0	0.281195	2	OR4F13P	LTR/ERVL-MaLR|THE1D|15|101807254|101807625	chr15	101807437	101913905	*	*	ENSG00000214344.4	transcribed_unprocessed_pseudogene	processed_transcript
trans2d64f4947423e9ed	Ovarian Serous Cystadenocarcinoma	Ovary	Primary	2.13705	0.0938907	0.392352	3	NA	LTR/ERVL-MaLR|MLT1J2|3|176275249|176275564	chr3	176275250	176284141	*	*	NA	NA	NA
trans2d775369c2d504b2	Skin Cutaneous Melanoma	Skin	Primary	2.79261	0.116375	0	2	RP11-59E19.3	LTR/ERV1|MER51E|3|109193017|109193441;LTR/ERVL-MaLR|THE1A~THE1A-int|3|109245490|109247451	chr3	109192678	109245651	*	*	ENSG00000239288.1	processed_pseudogene	processed_pseudogene
trans8d9b5ee697689137	Glioblastoma Multiforme	Brain	Primary	18.8846	1.62739	2.2701	11	CHI3L2	LTR/ERV1|MER4B|1|111215037|111215621	chr1	111215217	111243438	+	+	ENSG00000064886.13	protein_coding	protein_coding
transc1d3d723cbe17e11	Mesothelioma	Pleura	Primary	14.9195	0.893914	NA	2	NA	LTR/ERVL-MaLR|MLT1H1|13|105597519|105597771	chr13	105597425	105597892	*	*	NA	NA	NA
trans7108ed23fc466644	Testicular Germ Cell Tumors	Testis	Primary	12.7042	0.506921	0	2	RP11-174G6.1	LTR/ERV1|HERVH-int~LTR7Y|12|14705419|14710640	chr12	14705546	14710539	*	*	ENSG00000214772.2	antisense	antisense
trans28f8e2570c44c09e	Ovarian Serous Cystadenocarcinoma	Ovary	Primary	15.0314	0.917845	0	3	BTLA	LTR/ERV1|HERVH-int~LTR7|3|112418412|112423365;LTR/ERVL-MaLR|MLT1B|3|112518000|112518194	chr3	112418451	112518143	*	*	ENSG00000186265.9	protein_coding	protein_coding
trans2d7bd2a52ca29161	Breast Invasive Carcinoma	Breast	Primary	7.53642	0.291278	0.857423	3	NA	LTR/ERVL|LTR33A|2|131568415|131568806	chr2	131565024	131572933	*	*	NA	NA	NA
transb89c2c5a90b057a2	Bladder Urothelial Carcinoma	Bladder	Primary	34.9264	5.01918	1.20361	4	XRCC6	LTR/ERVL|LTR50|22|41656680|41656850	chr22	41656508	41664040	+	+	ENSG00000196419.12	protein_coding	protein_coding
transa1fca8085ef2fcea	Glioblastoma Multiforme	Brain	Primary	146.522	34.9898	5.69949	12	CHI3L2	LTR/ERV1|MER4B|1|111215037|111215621	chr1	111215217	111243438	+	+	ENSG00000064886.13	protein_coding	protein_coding
trans343ad11af02aee4c	Head and Neck Squamous Cell Carcinoma	Head and Neck	Primary	21.3738	2.18425	3.90321	12	SLC2A1-AS1	LTR/ERVL-MaLR|MLT1O|1|42970093|42970492	chr1	42924912	42974302	-	-	ENSG00000227533.5	lincRNA	lincRNA
transa36c1bacc536cc24	Testicular Germ Cell Tumors	Testis	Primary	9.50939	0.0114788	0.251986	2	NA	LTR/ERVK|HERVK-int~LTR5_Hs|7|4583400|4599422	chr7	4591795	4593806	*	*	NA	NA	NA
trans8f634d46d671b274	Testicular Germ Cell Tumors	Testis	Primary	9.50939	0.0114788	0.252025	2	NA	LTR/ERVK|LTR5_Hs|7|4582426|4583393;LTR/ERVK|HERVK-int~LTR5_Hs|7|4583400|4599422	chr7	4583291	4585302	*	*	NA	NA	NA
trans2b223958e905092d	Cervical Squamous Cell Carcinoma and Endocervical Adenocarcinoma	Cervix	Primary	8.69455	0.694963	0.067707	3	CTA-384D8.31	LTR/ERV1|MER57F|22|50542170|50542481	chr22	50542327	50551022	*	+	ENSG00000226738.1	antisense	antisense
trans2e42920ce45acb78	Rectum Adenocarcinoma	Colorectal	Primary	3.77537	0.122968	0.17925	2	AC018359.1	LTR/ERVL-MaLR|THE1D|3|34184557|34184932;LTR/ERVL|LTR16A|3|34189048|34189460	chr3	34184763	34189437	*	*	ENSG00000226320.5	lincRNA	lincRNA
trans4b94d1dc6bdfa52e	Skin Cutaneous Melanoma	Skin	Primary	36.7308	5.52897	5.16479	3	S100A7	LTR/ERVL-MaLR|THE1A|1|153506015|153506369	chr1	153457609	153506160	-	-	ENSG00000143556.8	protein_coding	protein_coding
transb8e6b9a224356516	Thymoma	Thymus	Primary	20.1486	1.95061	2.12887	2	NA	LTR/ERV1|LTR9A1|5|181113118|181113405	chr5	181113099	181113681	*	*	NA	NA	NA
trans0c117feef01daf13	Head and Neck Squamous Cell Carcinoma	Head and Neck	Primary	12.2523	0.474557	1.18069	3	MYO1B	LTR/ERVL-MaLR|MLT1G3|2|191243555|191244013	chr2	191242587	191277030	+	+	ENSG00000128641.18	protein_coding	protein_coding
trans3aa45cac6c469290	Cervical Squamous Cell Carcinoma and Endocervical Adenocarcinoma	Cervix	Primary	3.67697	0.219035	0.0454899	4	CTA-384D8.31	LTR/ERV1|MER57F|22|50542170|50542481	chr22	50542289	50547965	*	+	ENSG00000226738.1	antisense	antisense
trans2e51c0d287c70294	Esophageal Carcinoma	Esophagus	Primary	5.00173	0	0.886595	2	NA	LTR/ERV1|HERVH-int~LTR7Y|4|182814310|182818919	chr4	182815372	182815626	*	*	NA	NA	NA
trans2e62a4cb283bf552	Testicular Germ Cell Tumors	Testis	Primary	8.24943	0.0207122	0.0304775	1	NA	LTR/ERV1|HERVH-int~LTR7|20|13357880|13362222;LTR/ERV1|LTR7|20|13362239|13362689	chr20	13360136	13362531	*	*	NA	NA	NA
trans2e70c21bbcbc8dd2	Kidney Renal Clear Cell Carcinoma	Kidney	Primary	10.63	0.0983283	0.106837	3	NA	LTR/ERVL|MLT2B4|X|96500720|96501158;LTR/ERVL-MaLR|MLT1F|X|96516853|96517343	chrX	96500859	96518053	*	*	NA	NA	NA
trans2ec400f8befb70ea	Breast Invasive Carcinoma	Breast	Primary	2.01853	0.607658	0.394075	1	NA	LTR/ERVL-MaLR|MLT1L|2|131662627|131662806	chr2	131661662	131664393	*	*	NA	NA	NA
trans87afa67590288332	Thymoma	Thymus	Primary	17.4539	1.4652	1.76827	2	NNMT	LTR?|Eutr18|11|114262935|114263148	chr11	114257771	114262935	*	*	ENSG00000166741.7	protein_coding	protein_coding
transe608f064c0845809	Testicular Germ Cell Tumors	Testis	Primary	29.2599	4.24825	3.03514	2	RP11-253E3.3	LTR/Gypsy?|LTR85a|12|3045764|3046161	chr12	3044903	3046023	*	*	ENSG00000250899.3	lincRNA	lincRNA
transe0b684eef8aea919	Uveal Melanoma	Eye	Primary	9.62862	0.056455	NA	24	RP11-353N14.4	LTR/ERVL-MaLR|MLT1H|17|79938643|79939068	chr17	79881027	80035861	-	-	ENSG00000262188.1	lincRNA	lincRNA
trans15bf4eec622d54e3	Lymphoid Neoplasm Diffuse Large B-cell Lymphoma	Lymph Nodes	Primary	120.956	28.2296	0.283229	3	CCL18	LTR/ERVL-MaLR|MLT1K-int|17|36071877|36071990;LTR/ERVL-MaLR|MLT1K-int|17|36072148|36072275;LTR/ERVL-MaLR|MLT1K-int|17|36072450|36072803;LTR/ERVL|MLT2B3|17|36072804|36073389;LTR/ERVL-MaLR|MLT1K-int|17|36073390|36074286	chr17	36064382	36073404	+	+	ENSG00000275385.1	protein_coding	protein_coding
transba4ebc7abc37b4a4	Skin Cutaneous Melanoma	Skin	Primary	17.968	1.57984	0.26082	2	NA	LTR/ERVL-MaLR|THE1D|6|134398445|134398809	chr6	134398587	134406906	*	*	NA	NA	NA
trans2f353dffb473cc29	Testicular Germ Cell Tumors	Testis	Primary	4.082	0	0	3	NA	LTR/ERV1|HERVH-int|13|54268142|54270406	chr13	54245252	54269265	*	*	NA	NA	NA
trans1bbffe553de2436a	Ovarian Serous Cystadenocarcinoma	Ovary	Primary	30.8942	4.34837	0.206995	10	CLDN16	LTR/ERVL|MLT2A1|3|190370640|190371280	chr3	190306867	190412155	-	-	ENSG00000113946.3	protein_coding	protein_coding
trans1f4c1e63ca4f4b28	Lymphoid Neoplasm Diffuse Large B-cell Lymphoma	Lymph Nodes	Primary	11.056	0.30708	2.3494	6	AIM2	LTR/ERV1|MER41G|1|159077080|159077679	chr1	159061837	159077158	-	-	ENSG00000163568.13	protein_coding	protein_coding
trans2f64420119bc853a	Esophageal Carcinoma	Esophagus	Primary	2.93642	0	0.213152	2	ZNF320	LTR/ERV1|LTR7|19|52905176|52905448	chr19	52879653	52905206	*	*	ENSG00000182986.12	protein_coding	protein_coding
trans2f64420119bc853a	Ovarian Serous Cystadenocarcinoma	Ovary	Primary	2.48465	0	0.0135254	2	ZNF320	LTR/ERV1|LTR7|19|52905176|52905448	chr19	52879653	52905206	*	*	ENSG00000182986.12	protein_coding	protein_coding
trans2c5a02ebcafc0b37	Uveal Melanoma	Eye	Primary	9.68514	0.0821026	NA	10	GPR143	LTR/ERVL-MaLR|MLT1N2|X|9722657|9723192	chrX	9722848	9766070	-	-	ENSG00000101850.12	protein_coding	protein_coding
trans33daa40dfbc58a3d	Mesothelioma	Pleura	Primary	66.2702	13.1914	NA	5	CRLS1	LTR/ERVL-MaLR|MLT1C2|20|6039583|6040030	chr20	6039262	6053885	-	-	ENSG00000088766.11	protein_coding	protein_coding
trans2f64420119bc853a	Stomach Adenocarcinoma	Stomach	Primary	2.62815	0	0.47622	2	ZNF320	LTR/ERV1|LTR7|19|52905176|52905448	chr19	52879653	52905206	*	*	ENSG00000182986.12	protein_coding	protein_coding
trans2f9bf3a65eaf9de9	Glioblastoma Multiforme	Brain	Primary	3.9445	0.0856669	0.122822	4	RP11-698N11.2	LTR/ERVL-MaLR|MLT1K|11|35918485|35918994	chr11	35891629	35918748	-	-	ENSG00000254919.1	antisense	antisense
trans2fbeb243195fb377	Kidney Renal Papillary Cell Carcinoma	Kidney	Primary	3.9295	0.0759393	0.340641	2	NA	LTR/ERV1|Harlequin-int~LTR2B|13|22883560|22889835	chr13	22883800	22890008	*	*	NA	NA	NA
trans76f93c7e485a48ba	Testicular Germ Cell Tumors	Testis	Primary	11.2138	0.355789	0.223754	2	RP3-467D16.3	LTR/ERV1|HERVH-int~LTR7|6|16259012|16264893	chr6	16262210	16264137	*	*	ENSG00000282024.1	antisense	antisense
trans49fe859d38af18e5	Lymphoid Neoplasm Diffuse Large B-cell Lymphoma	Lymph Nodes	Primary	15.9808	1.24791	0.315935	2	AC133644.2	LTR/ERVL-MaLR|MLT1J~MLT1J-int|2|87439465|87440304	chr2	87439522	87445732	*	*	ENSG00000280721.1	lincRNA	lincRNA
transd7df7c7e30fae892	Uveal Melanoma	Eye	Primary	31.6685	4.63197	NA	3	PIK3CD-AS2	LTR/ERVL-MaLR|MLT1F1|1|9680798|9681231	chr1	9672706	9687574	-	-	ENSG00000231789.2	antisense	antisense
transa24065763a5c83d0	Bladder Urothelial Carcinoma	Bladder	Primary	55.0922	10.4661	12.989	5	SPINK1	LTR/ERVL-MaLR|THE1C|5|147839015|147839391	chr5	147824582	147839249	-	-	ENSG00000164266.10	protein_coding	protein_coding
transed369f412d545b64	Testicular Germ Cell Tumors	Testis	Primary	24.0558	2.95162	0.612583	2	BNIP3P17	LTR/ERV1|LTR70|19|20220441|20221668	chr19	20218669	20222942	*	*	ENSG00000271524.1	processed_pseudogene	processed_pseudogene
transb6600115bb03a9c3	Ovarian Serous Cystadenocarcinoma	Ovary	Primary	30.2611	4.3524	2.77512	10	MX1	LTR/ERV1|MER4CL34|21|41421877|41421982;LTR/ERV1|MER41A|21|41422024|41422448	chr21	41421967	41440919	+	+	ENSG00000157601.13	protein_coding	protein_coding
transb50474f3d6c4f4d4	Testicular Germ Cell Tumors	Testis	Primary	33.4843	5.10431	7.35194	5	DNALI1	LTR/ERVL-MaLR|MSTD|1|37569719|37569760;LTR/ERVL-MaLR|THE1B|1|37569761|37570116;LTR/ERVL-MaLR|MSTD|1|37570117|37570249	chr1	37566820	37579877	-	-	ENSG00000163879.10	protein_coding	protein_coding
trans58c26606e3ccc85a	Stomach Adenocarcinoma	Stomach	Primary	13.1828	0.737627	0.215784	3	NA	LTR/ERV1|HERVH-int~LTR7B|1|178040241|178045930	chr1	178041795	178045682	*	*	NA	NA	NA
trans06dd758f4a156617	Uveal Melanoma	Eye	Primary	9.45458	0.076378	NA	6	LINC01531	LTR/ERVL?|LTR89|19|35408609|35408812;LTR/ERVL?|LTR89|19|35409114|35409182	chr19	35408226	35411193	+	+	ENSG00000205786.8	lincRNA	lincRNA
trans306716a7d6013359	Uterine Carcinosarcoma	Uterus	Primary	1.73995	0.154708	0.0580746	2	LINC00871	LTR/ERVL-MaLR|MLT1B|14|46061732|46062117;LTR/ERV1|LTR9|14|46063783|46064404	chr14	46061737	46063915	*	*	ENSG00000258700.5	lincRNA	lincRNA
trans167c0eacfd2ffd29	Skin Cutaneous Melanoma	Skin	Primary	8.95493	0	0.359356	8	RP11-599J14.2	LTR/ERV1|HERVE-int|12|9406304|9406453;LTR/ERV1|HERVE-int|12|9407305|9407906	chr12	9397669	9407353	-	-	ENSG00000256673.1	unprocessed_pseudogene	unprocessed_pseudogene
transb89c2c5a90b057a2	Uterine Carcinosarcoma	Uterus	Primary	32.8888	5.01918	1.91911	4	XRCC6	LTR/ERVL|LTR50|22|41656680|41656850	chr22	41656508	41664040	+	+	ENSG00000196419.12	protein_coding	protein_coding
trans30125d7719d25fad	Testicular Germ Cell Tumors	Testis	Primary	9.76752	0.140148	0.267588	3	HLA-DPB2	LTR/ERV1|HUERS-P3b-int~LTR9C|6|33117740|33118640	chr6	33116814	33118412	+	+	ENSG00000224557.7	transcribed_unprocessed_pseudogene	transcribed_unprocessed_pseudogene
trans84b475944cbe2f16	Rectum Adenocarcinoma	Colorectal	Primary	13.8959	0.892205	0.0741397	7	PCCA	LTR/ERVL|LTR47B2|13|100438448|100438840	chr13	100438628	100588791	+	+	ENSG00000175198.14	protein_coding	protein_coding
transac0fb25873bacd1e	Kidney Renal Clear Cell Carcinoma	Kidney	Primary	18.4238	1.80182	4.5472	3	UGT2B11	LTR/ERV1|Harlequin-int~LTR2B|4|69050860|69051710;LTR/ERV1|HERV3-int|4|69058437|69063049	chr4	69051323	69063848	*	*	ENSG00000213759.8	protein_coding	protein_coding
transc9027d14556c593b	Testicular Germ Cell Tumors	Testis	Primary	34.7946	5.49432	8.44468	2	ERVW-1	LTR/ERV1|HERV17-int~LTR17|7|92467971|92475579	chr7	92468923	92477404	*	*	ENSG00000242950.6	protein_coding	protein_coding
transc5f0edd36605cb7e	Ovarian Serous Cystadenocarcinoma	Ovary	Primary	11.4046	0.438715	0	2	C1orf186	LTR/ERV1|MER72B|1|206066259|206066334	chr1	206064281	206066357	*	*	ENSG00000263961.6	protein_coding	protein_coding
transa6712e1f98fa3ba8	Uveal Melanoma	Eye	Primary	37.9077	6.31081	NA	2	P2RX7	LTR/ERVL-MaLR|MLT1H1|12|121186078|121186352	chr12	121183051	121186619	*	*	ENSG00000089041.16	protein_coding	protein_coding
transe63ccea43bef1b4d	Testicular Germ Cell Tumors	Testis	Primary	18.5286	2.2673	0.966178	2	LINC00665	LTR/ERV1|LTR6B|19|36324873|36325429;LTR/ERV1|HERVS71-int~LTR6B|19|36327346|36331043	chr19	36324894	36330997	*	*	ENSG00000232677.6	lincRNA	lincRNA
trans47e5ddcd89fac06e	Cervical Squamous Cell Carcinoma and Endocervical Adenocarcinoma	Cervix	Primary	29.9523	9.96386	1.36509	5	CCL20	LTR/ERV1|LTR2C|2|227805691|227806180	chr2	227805946	227817535	+	+	ENSG00000115009.11	protein_coding	protein_coding
transa617c337cb3d15f3	Kidney Renal Clear Cell Carcinoma	Kidney	Primary	10.7181	0.337243	0.087378	2	NA	LTR/ERV1|HERVH-int~LTR7|3|187466298|187472000	chr3	187466338	187469590	*	*	NA	NA	NA
transc480d7ba7ec977cf	Uveal Melanoma	Eye	Primary	12.2637	0.622502	NA	4	RP11-726G1.1	LTR/ERV1|HERVE-int|12|9567036|9567633	chr12	9567570	9573222	+	+	ENSG00000214776.9	transcribed_unprocessed_pseudogene	transcribed_unprocessed_pseudogene
transf4fba5f55d0c6673	Uveal Melanoma	Eye	Primary	16.6128	1.49213	NA	7	RNF219-AS1	LTR/ERVL-MaLR|THE1B|13|77924679|77925036	chr13	77895487	77925271	-	-	ENSG00000234377.7	antisense	antisense
transb89c2c5a90b057a2	Uterine Corpus Endometrial Carcinoma	Uterus	Primary	32.2621	5.01918	1.91911	4	XRCC6	LTR/ERVL|LTR50|22|41656680|41656850	chr22	41656508	41664040	+	+	ENSG00000196419.12	protein_coding	protein_coding
transbdff4164660d5ab0	Ovarian Serous Cystadenocarcinoma	Ovary	Primary	23.9568	3.42914	3.49689	2	PHACTR4	LTR/ERV1|MER51B|1|28497600|28497686	chr1	28497530	28498905	*	*	ENSG00000204138.12	protein_coding	protein_coding
transbc963221c9e20afd	Skin Cutaneous Melanoma	Skin	Primary	10.4024	0.29291	0.134606	8	RP13-735L24.1	LTR/ERV1|HERVE-int|12|9407305|9407906	chr12	9397063	9407586	-	-	ENSG00000260423.1	lincRNA	lincRNA
trans1afdf0b4b98da19a	Mesothelioma	Pleura	Primary	11.2728	0.455739	NA	17	MSLN	LTR/ERVL|MER54B|16|760973|761306	chr16	760799	769198	+	+	ENSG00000102854.14	protein_coding	protein_coding
trans7a58b1bbb2e26624	Esophageal Carcinoma	Esophagus	Primary	8.71325	0	0	2	RP11-297P16.4	LTR/ERVL-MaLR|MLT1H|4|103550693|103551146	chr4	103551011	103552149	*	*	ENSG00000250920.1	lincRNA	lincRNA
transbb8d045692769a9e	Uveal Melanoma	Eye	Primary	10.8803	0.385148	NA	4	RP11-386M24.9	LTR/ERVL-MaLR|MSTC|15|92678052|92678466	chr15	92617451	92678367	-	-	ENSG00000271763.1	antisense	antisense
trans360259f6fc3746c3	Head and Neck Squamous Cell Carcinoma	Head and Neck	Primary	33.4548	5.35065	4.3819	16	OAS3	LTR/ERVL-MaLR|MLT1N2|12|112971074|112971446;LTR/ERVL|ERV3-16A3_I-int|12|112972626|112972877	chr12	112937910	112973247	+	+	ENSG00000111331.12	protein_coding	protein_coding
transae89fd88830760c3	Ovarian Serous Cystadenocarcinoma	Ovary	Primary	19.8554	2.20144	3.18187	3	LINC00665	LTR/ERV1|LTR6B|19|36324873|36325429;LTR/ERV1|HERVS71-int~LTR6B|19|36327346|36331043	chr19	36324910	36331766	-	-	ENSG00000232677.6	lincRNA	lincRNA
trans8936c7e67fedf72c	Uterine Corpus Endometrial Carcinoma	Uterus	Primary	32.426	7.46521	8.2718	7	SPON1	LTR/ERVL-MaLR|MSTB2|11|14268266|14268701	chr11	14256124	14268903	+	+	ENSG00000262655.3	protein_coding	protein_coding
transe63ccea43bef1b4d	Uterine Carcinosarcoma	Uterus	Primary	18.1108	2.2673	2.46014	2	LINC00665	LTR/ERV1|LTR6B|19|36324873|36325429;LTR/ERV1|HERVS71-int~LTR6B|19|36327346|36331043	chr19	36324894	36330997	*	*	ENSG00000232677.6	lincRNA	lincRNA
trans421e7d461bd222f6	Testicular Germ Cell Tumors	Testis	Primary	109.456	26.7799	36.2497	9	KAT7	LTR?|Eutr18|17|49815068|49815355	chr17	49814943	49829094	+	+	ENSG00000136504.11	protein_coding	protein_coding
trans30d05a0b6386d08a	Glioblastoma Multiforme	Brain	Primary	1.69384	0	0	4	NAALADL2	LTR/ERV1|MER41C|3|175398828|175399385;LTR/ERV1|MER41A|3|175399388|175399850	chr3	175398929	175433244	*	*	ENSG00000177694.14	protein_coding	protein_coding
trans5e91af207580ca22	Kidney Renal Clear Cell Carcinoma	Kidney	Primary	44.6933	8.31526	2.29682	2	HILPDA	LTR/ERVL-MaLR|MLT1I|7|128459167|128459738	chr7	128455798	128460390	*	*	ENSG00000135245.9	protein_coding	protein_coding
transca5a98a1ef93a5e3	Uveal Melanoma	Eye	Primary	14.195	1.05877	NA	2	P2RX7	LTR/ERVL-MaLR|MLT1H1|12|121185542|121185773	chr12	121185096	121190201	*	*	ENSG00000089041.16	protein_coding	protein_coding
transc8034a128ec5add8	Pheochromocytoma and Paraganglioma	Adrenal Gland	Primary	302.751	90.786	67.0859	11	ATP6AP1	LTR/ERVL-MaLR|MLT1C|X|154424336|154424711	chrX	154424384	154436516	+	+	ENSG00000071553.16	protein_coding	protein_coding
trans2eb9bb46c5afa014	Uveal Melanoma	Eye	Primary	10.4542	0.335928	NA	2	NA	LTR/ERVL-MaLR|MSTA|GL000009.2|61237|61571	chr14_GL000009v2_random	59758	61237	*	*	NA	NA	NA
transa487ae341b096acb	Ovarian Serous Cystadenocarcinoma	Ovary	Primary	76.856	17.2358	5.48283	5	IFI27	LTR/ERV1|MER65B|14|94109400|94109807	chr14	94109525	94116695	+	+	ENSG00000165949.12	protein_coding	protein_coding
transbce81ff47ee1f3aa	Uveal Melanoma	Eye	Primary	39.8777	7.08225	NA	4	APOC1	LTR/ERV1|LTR2|19|44913972|44914427	chr19	44914054	44919349	+	+	ENSG00000130208.9	protein_coding	protein_coding
trans8dc4d1e3cb01e387	Pheochromocytoma and Paraganglioma	Adrenal Gland	Primary	12.2381	0.900544	0.208756	6	PRCD	LTR/ERVL-MaLR|MLT1L|17|76552998|76553448	chr17	76538006	76553578	+	+	ENSG00000214140.10	protein_coding	protein_coding
transbaa8d81b0d6e4c54	Kidney Renal Papillary Cell Carcinoma	Kidney	Primary	46.9736	8.94328	9.38831	2	C1orf186	LTR/ERV1|LTR2B|1|206052519|206053000;LTR/ERV1|Harlequin-int~LTR2B|1|206054886|206058912	chr1	206052624	206058864	*	*	ENSG00000263961.6	protein_coding	protein_coding
transc3e94254899536e4	Thyroid Carcinoma	Thyroid	Primary	23.8947	3.95219	5.23659	2	PHEX	LTR/Gypsy?|LTR88c|X|22270441|22270820	chrX	22249456	22270469	*	*	ENSG00000102174.8	protein_coding	protein_coding
transd5e0fb7a65b7e9bf	Ovarian Serous Cystadenocarcinoma	Ovary	Primary	10.4012	0.332794	0.00521142	2	MACROD2	LTR/ERVL-MaLR|MLT1G1|20|15886047|15886564;LTR/ERVL|LTR16C|20|15887427|15887655;LTR/ERVL|LTR16C|20|15887977|15888177;LTR/ERVL|LTR33|20|15891919|15892194;LTR/ERVL|LTR16B1|20|15893795|15894182;LTR/ERVL|LTR79|20|15894217|15894655;LTR/ERV1|Harlequin-int~LTR2B|20|15979869|15986246	chr20	15885817	15985845	*	*	ENSG00000172264.16	protein_coding	protein_coding
transbacbb2bd25634697	Brain Lower Grade Glioma	Brain	Primary	18.7127	2.02	2.51902	13	ETV1	LTR/ERVL-MaLR|MLT1D|7|13892530|13892985	chr7	13890687	13990130	-	-	ENSG00000006468.13	protein_coding	protein_coding
transec4528d35950815b	Cervical Squamous Cell Carcinoma and Endocervical Adenocarcinoma	Cervix	Primary	4.16316	0.246644	0.327668	4	CTA-384D8.31	LTR/ERV1|MER57F|22|50542170|50542481	chr22	50542138	50550920	*	+	ENSG00000226738.1	antisense	antisense
trans6258055444b36751	Lung Squamous Cell Carcinoma	Lung	Primary	10.1682	0.298605	0	2	CLEC2L	LTR/ERVL-MaLR|MLT1J|7|139542288|139542619	chr7	139542522	139544984	+	+	ENSG00000236279.6	protein_coding	protein_coding
trans53410eb48c417255	Testicular Germ Cell Tumors	Testis	Primary	14.1399	2.50976	0.541511	2	NA	LTR/Gypsy?|LTR85c|2|202368889|202369074	chr2	202359594	202369098	*	*	NA	NA	NA
trans8b1d278d8193c417	Uveal Melanoma	Eye	Primary	9.57368	0.191637	NA	2	IQCK	LTR/ERVL-MaLR|MLT1J|16|19761764|19762277	chr16	19761658	19766274	*	*	ENSG00000174628.16	protein_coding	protein_coding
trans92e4ce2c01da2949	Testicular Germ Cell Tumors	Testis	Primary	10.864	0.432252	0.569685	2	NA	LTR/ERVL-MaLR|MLT1H|22|27666470|27666961	chr22	27666881	27669432	*	*	NA	NA	NA
trans5089a21c9aef935e	Testicular Germ Cell Tumors	Testis	Primary	9.41435	0.164696	0.425732	2	NA	LTR/ERV1|HERVH-int~LTR7Y|22|32502754|32508503	chr22	32505287	32508246	*	*	NA	NA	NA
transc5dca333e5008a2b	Rectum Adenocarcinoma	Colorectal	Primary	18.8322	3.14997	4.78724	2	CEACAM6	LTR/ERV1|MER65-int|19|41730434|41731833;LTR/ERV1|MER65-int|19|41770580|41771854;LTR/ERV1|LTR54B|19|41771856|41772234	chr19	41730413	41772208	*	*	ENSG00000086548.8	protein_coding	protein_coding
transd498bdda5e57fc07	Kidney Renal Papillary Cell Carcinoma	Kidney	Primary	9.90668	0.257297	1.52849	2	LINC00621	LTR/ERV1|MER4-int~MER4C|13|22902695|22902961;LTR/ERVK|MER9a1|13|22902962|22903451;LTR/ERVL-MaLR|MLT1A1-int|13|22908296|22909109;LTR/ERV1|MER110-int|13|22909129|22909703	chr13	22902631	22909702	*	*	ENSG00000262619.1	lincRNA	lincRNA
transc9c2ae8f9a2ce66b	Pheochromocytoma and Paraganglioma	Adrenal Gland	Primary	28.2393	4.26519	2.24064	6	CHRNA5	LTR/ERVL-MaLR|MLT1A0|15|78595690|78596031	chr15	78594552	78620813	-	-	ENSG00000169684.13	protein_coding	protein_coding
trans04bac9f2d3d472f4	Uveal Melanoma	Eye	Primary	27.5543	4.10145	NA	2	P2RX7	LTR/ERVL-MaLR|MLT1H1|12|121185542|121185773	chr12	121184956	121193090	*	*	ENSG00000089041.16	protein_coding	protein_coding
transfafea4fbbd73b3be	Liver Hepatocellular Carcinoma	Liver	Primary	12.2948	0.716515	2.01767	2	PFN1P11	LTR/ERVK|HERVK11-int~MER11B|10|102838114|102845149	chr10	102838266	102844402	*	*	ENSG00000213061.2	processed_pseudogene	processed_pseudogene
trans84f476db248c3007	Pheochromocytoma and Paraganglioma	Adrenal Gland	Primary	8.50983	0.0128941	0.0799243	3	TMEM114	LTR/ERVL-MaLR|THE1B|16|8584948|8585308	chr16	8569500	8585185	-	-	ENSG00000232258.6	protein_coding	protein_coding
transec51d5bc9b945f83	Testicular Germ Cell Tumors	Testis	Primary	9.51657	0.19449	0	2	PYGL	LTR/ERV1|HERVH-int~LTR7|14|50893162|50896881	chr14	50893575	50896472	*	*	ENSG00000100504.16	protein_coding	protein_coding
trans70a53323dae4f417	Ovarian Serous Cystadenocarcinoma	Ovary	Primary	8.94639	0.092234	0	2	MACROD2	LTR/ERVL|LTR16B1|20|15893795|15894182;LTR/ERVL|LTR79|20|15894217|15894655;LTR/ERV1|Harlequin-int~LTR2B|20|15979869|15986246	chr20	15893583	15985976	*	*	ENSG00000172264.16	protein_coding	protein_coding
transf626686a8092e46e	Sarcoma	Soft Tissue	Primary	8.48078	0.0132625	NA	2	COL6A2	LTR/ERVL-MaLR|MLT1C2|21|46129568|46129880	chr21	46126502	46131973	*	*	ENSG00000142173.14	protein_coding	protein_coding
trans5da77f603f16d0af	Skin Cutaneous Melanoma	Skin	Primary	12.0221	0.678882	0.189805	8	RP11-726G1.1	LTR/ERV1|HERVE-int|12|9567036|9567633;LTR/ERV1|HERVE-int|12|9568604|9569205	chr12	9567588	9575663	+	+	ENSG00000214776.9	transcribed_unprocessed_pseudogene	transcribed_unprocessed_pseudogene
transe5d189d7ef1d23a7	Kidney Renal Clear Cell Carcinoma	Kidney	Primary	27.2828	4.08042	9.01984	2	UGT2B11	LTR/ERV1|Harlequin-int~LTR2B|4|69050860|69051710;LTR/ERV1|HERV3-int|4|69058437|69063049	chr4	69051563	69063075	*	*	ENSG00000213759.8	protein_coding	protein_coding
trans67aebccd85827d83	Testicular Germ Cell Tumors	Testis	Primary	8.43215	0.00737195	0.122961	2	NA	LTR/ERVK|LTR5_Hs|7|4582426|4583393;LTR/ERVK|HERVK-int~LTR5_Hs|7|4583400|4599422;LTR/ERVK|LTR5_Hs|7|4599433|4600400	chr7	4583106	4600155	*	*	NA	NA	NA
trans310de894644aa4e3	Cholangiocarcinoma	Bile Duct	Primary	1.58725	0.0329016	0.0167326	2	MIR4532	LTR/ERVL|MLT2D|20|57891821|57892186;LTR/ERVL-MaLR|MSTC|20|57914895|57915312	chr20	57890563	57915130	*	*	ENSG00000263453.1	miRNA	miRNA
transb5e2d1b05f7d0b7b	Testicular Germ Cell Tumors	Testis	Primary	8.32881	0	0	2	AC007381.1	LTR/ERV1|LTR7|2|60417435|60417833;LTR/ERV1|HERVH-int~LTR7Y|2|60418526|60422485	chr2	60417730	60419934	*	*	ENSG00000276812.1	miRNA	miRNA
trans87af42e77873f060	Esophageal Carcinoma	Esophagus	Primary	49.8408	10.0196	6.60214	4	CKS2	LTR/ERVL-MaLR|MLT1H|9|89304625|89304853;LTR/ERV1|MER41A|9|89308867|89309386	chr9	89304717	89316702	+	+	ENSG00000123975.4	protein_coding	protein_coding
trans3056cceac6a2f01b	Testicular Germ Cell Tumors	Testis	Primary	8.32867	0	0	2	AC008753.1	LTR/ERV1|LTR7|19|53831404|53831854;LTR/ERV1|HERVH-int~LTR7|19|53832340|53837348	chr19	53831852	53834106	*	*	ENSG00000274524.1	miRNA	miRNA
trans11385bb804f44cf8	Kidney Renal Clear Cell Carcinoma	Kidney	Primary	9.53259	0.21964	0.0982637	2	UBE2D2	LTR/ERV1|Harlequin-int~LTR2B|5|139525866|139526720;LTR/ERV1|Harlequin-int~LTR2B|5|139526721|139531564	chr5	139526504	139527447	*	*	ENSG00000131508.15	protein_coding	protein_coding
trans99a67540ebc94800	Mesothelioma	Pleura	Primary	36.5782	6.48193	NA	2	SLC28A3	LTR/ERVL-MaLR|MLT1I|9|84277343|84277623	chr9	84276860	84278185	*	*	ENSG00000197506.7	protein_coding	protein_coding
trans331534ad189a541d	Uterine Carcinosarcoma	Uterus	Primary	43.432	8.29522	4.29947	3	PARP1	LTR/ERVL-MaLR|MLT1O|1|226363461|226363822	chr1	226360692	226363532	-	-	ENSG00000143799.12	protein_coding	protein_coding
trans31268d5db643f752	Skin Cutaneous Melanoma	Skin	Primary	8.44885	0.184457	0.536786	2	RGS20	LTR/ERVL-MaLR|MLT1C2|8|53913412|53913861	chr8	53880851	53913809	*	*	ENSG00000147509.13	protein_coding	protein_coding
trans747dd898e1aa44c1	Uterine Corpus Endometrial Carcinoma	Uterus	Primary	49.0062	9.81241	12.3697	15	ELP3	LTR/ERVL|LTR66|8|28089942|28090341	chr8	28090311	28191150	+	+	ENSG00000134014.16	protein_coding	protein_coding
trans08a436c590d0a04b	Thyroid Carcinoma	Thyroid	Primary	20.7938	2.60434	0.042238	7	SYT12	LTR/ERVL|LTR16A1|11|67049912|67050185	chr11	67030118	67050862	+	+	ENSG00000173227.13	protein_coding	protein_coding
trans5c2b6a6dc8ffc0e9	Ovarian Serous Cystadenocarcinoma	Ovary	Primary	11.2406	0.551004	0	3	BTLA	LTR/ERV1|HERVH-int~LTR7|3|112418412|112423365;LTR/ERVL-MaLR|MLT1B|3|112518000|112518194	chr3	112418451	112518143	*	*	ENSG00000186265.9	protein_coding	protein_coding
trans5e1c306092df18bd	Glioblastoma Multiforme	Brain	Primary	43.5361	8.34323	0	7	PEBP1	LTR/ERV1|MER41E|12|118117691|118117878;LTR/ERVL-MaLR|MLT1F2|12|118126475|118126728	chr12	118111441	118145168	*	*	ENSG00000089220.4	protein_coding	protein_coding
transca5a98a1ef93a5e3	Skin Cutaneous Melanoma	Skin	Metastasis	13.7425	1.05877	2.03678	2	P2RX7	LTR/ERVL-MaLR|MLT1H1|12|121185542|121185773	chr12	121185096	121190201	*	*	ENSG00000089041.16	protein_coding	protein_coding
trans9d6bbad1e074899c	Cervical Squamous Cell Carcinoma and Endocervical Adenocarcinoma	Cervix	Primary	32.7569	7.56791	7.31342	13	CLEC9A	LTR?|MamRep605b|12|10062174|10062412	chr12	9853062	10117470	-	-	ENSG00000197992.6	protein_coding	protein_coding
trans43194a2f3d0934de	Liver Hepatocellular Carcinoma	Liver	Primary	12.7532	0.8611	0.994081	8	FETUB	LTR?|MamRep605b|3|186636017|186636182;LTR/ERVL|LTR84b|3|186653040|186653592;LTR/ERVL|LTR33|3|186653595|186653658	chr3	186635929	186653694	+	+	ENSG00000090512.11	protein_coding	protein_coding
trans6a48314bd253f8d6	Pheochromocytoma and Paraganglioma	Adrenal Gland	Primary	1.20447	0.015751	0.151128	2	DBH	LTR/ERVL|MER74B|9|133638450|133638692;LTR/ERVL|MER74B|9|133640696|133641066	chr9	133636688	133640967	*	-	ENSG00000123454.10	protein_coding	protein_coding
trans28e73d21fac2213a	Cervical Squamous Cell Carcinoma and Endocervical Adenocarcinoma	Cervix	Primary	22.1879	2.94903	0.974162	2	NA	LTR/ERV1|HERVH-int~LTR7Y|4|182814310|182818919	chr4	182814388	182818841	*	*	NA	NA	NA
transc4140b1617693520	Testicular Germ Cell Tumors	Testis	Primary	9.39177	1.21856e-06	0	4	DENND3	LTR/ERVL-MaLR|MLT1C2|8|141197160|141197602	chr8	141195010	141202855	*	+	ENSG00000105339.10	protein_coding	protein_coding
transd7dea9aca006390e	Testicular Germ Cell Tumors	Testis	Primary	9.58663	0.245001	0.560678	3	CTD-2354A18.1	LTR/ERV1|HERVH-int~LTR7Y|18|73325619|73330362;LTR/ERV1|LTR78B|18|73332403|73332770	chr18	73327000	73349878	+	+	ENSG00000261780.2	processed_transcript	lincRNA
transf71ee95e62821134	Testicular Germ Cell Tumors	Testis	Primary	8.24412	0	0	4	NA	LTR/ERV1|HERVH-int~LTR7Y|8|97175029|97180739;LTR/ERV1|HERVH-int~LTR7|8|97200770|97206656	chr8	97177234	97206238	*	*	NA	NA	NA
trans3432467c3b86f62d	Cholangiocarcinoma	Bile Duct	Primary	1.70387	0.052874	0.559869	2	RP11-462L8.1	LTR/Gypsy|MamGypLTR3a|10|32990725|32991275	chr10	32990473	33004769	*	*	ENSG00000229656.6	lincRNA	lincRNA
trans3029e562e2dd6f3e	Skin Cutaneous Melanoma	Skin	Primary	46.2354	9.20187	5.41544	15	ADGRG1	LTR/ERV1|LTR78B|16|57665497|57666359	chr16	57628705	57665571	+	+	ENSG00000205336.11	protein_coding	protein_coding
transbc0cdf7b309841a3	Testicular Germ Cell Tumors	Testis	Primary	19.1671	2.28511	1.55905	4	RP11-320N7.2	LTR/ERV1|HERVH-int~LTR7|12|4018541|4023694	chr12	4012951	4026650	*	*	ENSG00000256969.1	lincRNA	lincRNA
transf03446130afafe94	Kidney Renal Papillary Cell Carcinoma	Kidney	Primary	36.1773	6.5058	0.567071	6	TNFAIP6	LTR/ERV1|LTR54|2|151380467|151380905;LTR/ERV1|MER39|2|151381022|151381191	chr2	151357527	151381240	+	+	ENSG00000123610.4	protein_coding	protein_coding
trans786c3b072fa4b5ce	Esophageal Carcinoma	Esophagus	Primary	8.18482	0	0	2	NA	LTR/ERV1|HERVH-int~LTR7Y|X|4540474|4546320	chrX	4545047	4546135	*	*	NA	NA	NA
trans585c1bf35f78177e	Testicular Germ Cell Tumors	Testis	Primary	8.99061	0.148921	0.365651	9	Metazoa_SRP	LTR/ERV1|MER34A1|3|109300184|109300371	chr3	109293785	109315052	-	-	ENSG00000277635.1	misc_RNA	misc_RNA
transe022a8c9a8ca66ab	Testicular Germ Cell Tumors	Testis	Primary	13.7077	1.09394	0.0458752	5	AC092057.1	LTR/ERV1|MER110A|3|54632465|54632901;LTR/ERV1|MER61A|3|54633394|54633720;LTR/ERV1|HERVH-int~LTR7|3|54634484|54640204	chr3	54632126	54639787	-	-	ENSG00000276927.1	miRNA	miRNA
transcd56dccbc8bb3ff2	Testicular Germ Cell Tumors	Testis	Primary	12.2059	0.782614	1.48327	2	RP11-415G4.1	LTR/ERV1|HERVH-int~LTR7|13|55578228|55584087	chr13	55578476	55584087	*	*	ENSG00000274090.1	lincRNA	lincRNA
trans0c1c30fd8130e94d	Uveal Melanoma	Eye	Primary	8.89119	0.136859	NA	31	LONP2	LTR/Gypsy|LTR81B|16|48234580|48235160	chr16	48166669	48247561	-	-	ENSG00000102910.13	protein_coding	protein_coding
transa58d75e1332ff88b	Testicular Germ Cell Tumors	Testis	Primary	22.8885	3.18961	1.03563	2	NA	LTR/ERVK|HERVK-int~LTR5B|20|34133703|34136578	chr20	34132456	34136450	*	*	NA	NA	NA
trans7aa076a41839b883	Esophageal Carcinoma	Esophagus	Primary	255.819	78.1924	4.68896	6	EPCAM	LTR/ERVL-MaLR|MLT1O|2|47374935|47374978	chr2	47374845	47387018	+	+	ENSG00000119888.10	protein_coding	protein_coding
transf5d6b44156f0aaf3	Stomach Adenocarcinoma	Stomach	Primary	8.11059	0	1.59984	2	NA	LTR/ERV1|HERVH-int~LTR7B|4|163093170|163097474;LTR/ERV1|HERVH-int~LTR7Y|4|163099941|163103875	chr4	163096858	163101190	*	*	NA	NA	NA
transcd40d86cf8f8f327	Lymphoid Neoplasm Diffuse Large B-cell Lymphoma	Lymph Nodes	Primary	33.2362	5.83227	4.76242	5	RP4-620F22.2	LTR/ERVL-MaLR|THE1B|1|89257094|89257453;LTR/ERVL-MaLR|MLT1D|1|89257769|89257944;LTR/ERV1|LTR21B|1|89259774|89259994	chr1	89256190	89264790	-	-	ENSG00000237568.1	antisense	antisense
transcaf7037ecd0921c8	Testicular Germ Cell Tumors	Testis	Primary	37.7801	7.07195	0.400151	2	NA	LTR/ERV1|HERVH-int~LTR7Y|19|5548576|5552763;LTR/ERV1|LTR7Y|19|5552772|5553212	chr19	5548655	5553120	*	*	NA	NA	NA
transa36c1bacc536cc24	Uveal Melanoma	Eye	Primary	8.10778	0.0114788	NA	2	NA	LTR/ERVK|HERVK-int~LTR5_Hs|7|4583400|4599422	chr7	4591795	4593806	*	*	NA	NA	NA
trans8f634d46d671b274	Uveal Melanoma	Eye	Primary	8.10778	0.0114788	NA	2	NA	LTR/ERVK|LTR5_Hs|7|4582426|4583393;LTR/ERVK|HERVK-int~LTR5_Hs|7|4583400|4599422	chr7	4583291	4585302	*	*	NA	NA	NA
trans350462a12644b3ee	Kidney Renal Papillary Cell Carcinoma	Kidney	Primary	16.8433	0.860772	1.89495	2	NA	LTR/ERVL-MaLR|MLT1J2|7|53377733|53378101	chr7	53377345	53398777	*	*	NA	NA	NA
trans2dfb3dc4afec0c59	Brain Lower Grade Glioma	Brain	Primary	11.5217	0.148838	0.575846	9	DLL3	LTR/ERVL-MaLR|MLT1K|19|39508547|39508616	chr19	39498860	39508649	+	+	ENSG00000090932.10	protein_coding	protein_coding
transbe9614240d0bc77d	Lung Squamous Cell Carcinoma	Lung	Primary	2.00579	0.0656113	0.00627615	3	DMP1	LTR/ERVL-MaLR|THE1B|4|87672907|87673287	chr4	87618819	87710819	-	-	ENSG00000152592.13	protein_coding	protein_coding
transcfd808a9c4470468	Testicular Germ Cell Tumors	Testis	Primary	8.01027	0	0.594672	2	NA	LTR/ERVL-MaLR|THE1A-int|15|45297782|45298586;LTR/ERVL-MaLR|THE1A-int|15|45298894|45299572	chr15	45298440	45299054	*	*	NA	NA	NA
trans3607be16e4144751	Kidney Renal Clear Cell Carcinoma	Kidney	Primary	4.11403	0	0.429204	2	RP4-764O22.1	LTR/ERVL|LTR67B|20|7069555|7069827	chr20	7067844	7069694	*	*	ENSG00000232271.1	lincRNA	lincRNA
trans03c554bc64386317	Ovarian Serous Cystadenocarcinoma	Ovary	Primary	24.997	3.80102	0.0600827	5	C1orf186	LTR/ERV1|Harlequin-int~LTR2B|1|206054886|206058912	chr1	206035113	206061911	*	*	ENSG00000263961.6	protein_coding	protein_coding
trans32635eb5f4e71a1b	Esophageal Carcinoma	Esophagus	Primary	1.19408	0.118428	0.0917154	1	DLEU1-AS1	LTR/ERV1|LTR37B|13|50515844|50516323	chr13	50512238	50519631	*	-	ENSG00000229323.1	lincRNA	lincRNA
trans7fbdff6e0198ab92	Skin Cutaneous Melanoma	Skin	Primary	359.87	117.407	119.768	5	LY6E	LTR/ERVL|MER21A|8|143016840|143017196	chr8	143016943	143022408	+	+	ENSG00000160932.10	protein_coding	protein_coding
transfc05feddeb80dbcc	Lymphoid Neoplasm Diffuse Large B-cell Lymphoma	Lymph Nodes	Primary	19.3888	2.4546	0.804098	8	RP11-367J7.3	LTR/Gypsy?|LTR88b|1|157676958|157677469	chr1	157676489	157695534	-	-	ENSG00000227217.1	antisense	antisense
trans78034124bcd32d6a	Uveal Melanoma	Eye	Primary	8.72171	0.143269	NA	2	RP11-44D5.1	LTR/ERVK|MER11B|3|15738768|15739435	chr3	15661021	15740963	*	*	ENSG00000270409.1	transcribed_unprocessed_pseudogene	transcribed_unprocessed_pseudogene
transafb12815476cedf8	Lung Squamous Cell Carcinoma	Lung	Primary	8.66824	0.133833	0.372007	2	NA	LTR/ERV1|HERVH-int~LTR7Y|6|144923175|144928858	chr6	144923642	144928767	*	*	NA	NA	NA
trans36be4f09cb3553c0	Testicular Germ Cell Tumors	Testis	Primary	33.3185	0	0.407018	2	PCDH11X	LTR/ERV1|HERVH-int~LTR7|X|92100240|92101062;LTR/ERV1|HERVH-int~LTR7Y|X|92101064|92105917	chrX	92100386	92105842	*	*	ENSG00000102290.21	protein_coding	protein_coding
trans0d1e07344d58786e	Testicular Germ Cell Tumors	Testis	Primary	21.9685	3.1002	4.2421	2	ZNF528	LTR/ERV1|LTR7B|19|52516488|52516920	chr19	52380019	52516877	*	*	ENSG00000167555.13	protein_coding	protein_coding
trans7ce442f47379f901	Uveal Melanoma	Eye	Primary	25.9479	4.09854	NA	23	ABHD12B	LTR/ERVL-MaLR|MLT1A0|14|50904682|50905016;LTR/Gypsy?|LTR88b|14|50955550|50956103	chr14	50903009	50956775	-	-	ENSG00000131969.14	protein_coding	protein_coding
trans9e46161282678471	Uterine Corpus Endometrial Carcinoma	Uterus	Primary	121.601	33.0564	34.2414	2	NR2F6	LTR/ERVL-MaLR|MLT1K|19|17231872|17231891	chr19	17231884	17236116	*	*	ENSG00000160113.5	protein_coding	protein_coding
trans7001742329e4f628	Testicular Germ Cell Tumors	Testis	Primary	13.5897	1.15845	0	5	CACNA2D3	LTR/ERV1|MER110A|3|54632465|54632901;LTR/ERV1|MER61A|3|54633394|54633720;LTR/ERV1|HERVH-int~LTR7|3|54634484|54640204	chr3	54632333	54642151	-	-	ENSG00000157445.14	protein_coding	protein_coding
trans36e6606c3fd2ab55	Kidney Renal Papillary Cell Carcinoma	Kidney	Primary	3.52189	0.154212	0.375233	2	NA	LTR/ERV1|MER67C|5|28523698|28524297;LTR/ERVK|HERVK14C-int~LTR14B|5|28547371|28548117	chr5	28524219	28548236	*	*	NA	NA	NA
transa63c946ef19489bf	Bladder Urothelial Carcinoma	Bladder	Primary	25.1794	3.92484	3.07205	8	DKFZp434J0226	LTR/ERVL|MER70B|19|46208911|46208986	chr19	46204898	46231241	+	+	ENSG00000268460.1	processed_transcript	lincRNA
transabe6ec9553833531	Uveal Melanoma	Eye	Primary	52.3448	11.3979	NA	2	RP11-353N14.7	LTR/Gypsy|MamGypLTR1b|17|79933346|79933643	chr17	79932344	79971084	*	*	ENSG00000275516.1	antisense	antisense
trans5aff0ef287f92ff2	Rectum Adenocarcinoma	Colorectal	Primary	21.1764	5.3784	6.60172	3	AP003774.1	LTR/ERV1|LTR23|11|64325018|64325218;LTR/ERVL-MaLR|MLT1J|11|64327415|64327797	chr11	64324832	64329498	-	-	ENSG00000236935.1	antisense	antisense
transc4f671c468fbc763	Testicular Germ Cell Tumors	Testis	Primary	21.55	3.02614	0.0965711	4	PLA2G2D	LTR/ERVL|LTR16A1|1|20112609|20113064	chr1	20112224	20119579	-	-	ENSG00000117215.14	protein_coding	protein_coding
trans72096b821086e220	Ovarian Serous Cystadenocarcinoma	Ovary	Primary	14.8644	1.45415	2.01374	2	HIST1H4I	LTR/ERV1|LTR48B|6|27138224|27138814	chr6	27138370	27146765	*	*	ENSG00000276180.1	protein_coding	protein_coding
trans7d277fcf39e4f2ac	Prostate Adenocarcinoma	Prostate	Primary	31.7082	5.64097	4.33831	4	AMACR	LTR/ERVL|LTR33A|5|33986535|33986963;LTR/ERVL-MaLR|MLT1L|5|33988059|33988546	chr5	33986200	34008146	-	-	ENSG00000242110.7	protein_coding	protein_coding
trans49fae8cab1376dbb	Rectum Adenocarcinoma	Colorectal	Primary	7.86548	0	0.118064	2	NA	LTR/ERV1|HERVH-int~LTR7Y|X|4540474|4546320	chrX	4541538	4545907	*	*	NA	NA	NA
transb5176d2311fd99b6	Uveal Melanoma	Eye	Primary	8.54637	0.130221	NA	6	COG2	LTR/ERVL-MaLR|MLT1F|1|230621279|230621742	chr1	230621632	230667384	+	+	ENSG00000135775.13	protein_coding	protein_coding
transd189f12bdb7a2c12	Esophageal Carcinoma	Esophagus	Primary	7.87329	1.24335	3.2932e-05	5	SNRPD1	LTR/ERV1|MER57B2|18|21629397|21629777	chr18	21612247	21793609	+	+	ENSG00000167088.10	protein_coding	protein_coding
trans3296c3bd094f60d2	Ovarian Serous Cystadenocarcinoma	Ovary	Primary	19.4395	2.53851	0.804004	5	KRBOX1	LTR/ERV1|MER39|3|42809253|42809581	chr3	42784094	42809494	-	-	ENSG00000240747.7	protein_coding	protein_coding
transf59f6cd76e2f4adf	Lymphoid Neoplasm Diffuse Large B-cell Lymphoma	Lymph Nodes	Primary	11.6068	0.757146	0.177051	2	SQRDL	LTR/ERVL-MaLR|THE1A|15|45630954|45631306	chr15	45631024	45632019	*	*	ENSG00000137767.13	protein_coding	protein_coding
trans81476bc1a4e595d8	Liver Hepatocellular Carcinoma	Liver	Primary	8.96532	0.228834	1.47584	2	NA	LTR/ERV1|LTR12E|1|154677855|154679190;LTR/ERV1|LTR12C|1|154679191|154679312	chr1	154679029	154684701	*	*	NA	NA	NA
trans114cffc0a048c085	Bladder Urothelial Carcinoma	Bladder	Primary	41.8592	8.53786	5.18083	2	NA	LTR/ERV1|HERV30-int~LTR30|10|53025174|53026354;LTR/ERV1|HERV30-int~LTR30|10|53026355|53030661	chr10	53025291	53030136	*	*	NA	NA	NA
trans8bf5b945812483be	Pheochromocytoma and Paraganglioma	Adrenal Gland	Primary	22.8269	3.41888	0.762472	23	EGFLAM	LTR/ERVL-MaLR|MLT1H|5|38466128|38466632	chr5	38258519	38468428	+	+	ENSG00000164318.17	protein_coding	protein_coding
trans370a28867bc7fee5	Kidney Renal Papillary Cell Carcinoma	Kidney	Primary	19.8906	0.255452	2.67912	1	LINC00621	LTR/ERV1|MER110-int|13|22910012|22910257	chr13	22909979	22910378	*	*	ENSG00000262619.1	lincRNA	lincRNA
transc0a1ecaf9a3492ff	Bladder Urothelial Carcinoma	Bladder	Primary	98.6825	26.0816	15.7841	4	IFI27	LTR?|Eutr5|14|94110371|94110617	chr14	94110543	94116695	+	+	ENSG00000165949.12	protein_coding	protein_coding
trans7ec37ab94ce8564c	Uveal Melanoma	Eye	Primary	64.5302	15.3351	NA	4	SNHG16	LTR/ERVL-MaLR|THE1B|17|76564566|76564680	chr17	76564380	76570587	-	-	ENSG00000163597.14	processed_transcript	lincRNA
trans2785fe15df551272	Kidney Renal Clear Cell Carcinoma	Kidney	Primary	20.2498	3.07237	2.66617	10	NETO2	LTR/ERV1|LTR12E|16|47143725|47143941	chr16	47080803	47144035	-	-	ENSG00000171208.9	protein_coding	protein_coding
trans5578b41e5b68e0ba	Pheochromocytoma and Paraganglioma	Adrenal Gland	Primary	13.9224	1.30259	0.211138	3	KCNB2	LTR/ERV1|PABL_A|8|72932095|72932746	chr8	72932449	72950443	*	*	ENSG00000182674.5	protein_coding	protein_coding
trans372ca3c6a347a814	Skin Cutaneous Melanoma	Skin	Primary	56.3621	0.553703	0.0880189	3	BANCR	LTR/ERV1|MER41-int|9|69304826|69305247;LTR/ERV1|MER41-int~MER41B|9|69306160|69307567	chr9	69296715	69307186	-	-	ENSG00000278910.3	lincRNA	lincRNA
trans61e1a0df303027d5	Uveal Melanoma	Eye	Primary	19.5104	2.63217	NA	6	RP11-1055B8.2	LTR/ERVL|MLT2D|17|81375748|81376170	chr17	81357252	81380565	-	-	ENSG00000263154.1	lincRNA	lincRNA
transef3eba9d94454a02	Skin Cutaneous Melanoma	Skin	Primary	9.03813	0.263114	0.694522	4	RP11-1055B8.3	LTR/ERVL|MLT2D|17|81375748|81376170	chr17	81376151	81381889	-	-	ENSG00000262223.6	lincRNA	lincRNA
transadfbd429001c9bf8	Pancreatic Adenocarcinoma	Pancreas	Primary	159.131	46.9721	3.96476	4	CEACAM5	LTR/ERV1|MER65-int|19|41770580|41771854;LTR/ERV1|LTR54B|19|41771856|41772234	chr19	41719992	41772208	+	+	ENSG00000105388.15	protein_coding	protein_coding
transa6712e1f98fa3ba8	Skin Cutaneous Melanoma	Skin	Metastasis	33.441	6.31081	10.2888	2	P2RX7	LTR/ERVL-MaLR|MLT1H1|12|121186078|121186352	chr12	121183051	121186619	*	*	ENSG00000089041.16	protein_coding	protein_coding
trans0141e3208a398c3b	Ovarian Serous Cystadenocarcinoma	Ovary	Primary	11.6311	0.818837	0	2	UBE2D2	LTR/ERV1|Harlequin-int~LTR2B|5|139526721|139531564	chr5	139527878	139535164	*	*	ENSG00000131508.15	protein_coding	protein_coding
trans372ca3c6a347a814	Uveal Melanoma	Eye	Primary	16.2339	0.553703	NA	3	BANCR	LTR/ERV1|MER41-int|9|69304826|69305247;LTR/ERV1|MER41-int~MER41B|9|69306160|69307567	chr9	69296715	69307186	-	-	ENSG00000278910.3	lincRNA	lincRNA
transe6479c565a196c8d	Testicular Germ Cell Tumors	Testis	Primary	144.541	42.1773	23.9003	2	PRCD	LTR/ERVL-MaLR|THE1B|17|76564566|76564680	chr17	76476033	76565347	*	*	ENSG00000214140.10	protein_coding	protein_coding
trans28e73d21fac2213a	Head and Neck Squamous Cell Carcinoma	Head and Neck	Primary	20.5645	2.94903	3.53974	2	NA	LTR/ERV1|HERVH-int~LTR7Y|4|182814310|182818919	chr4	182814388	182818841	*	*	NA	NA	NA
transbb055c21fb9c5f4c	Esophageal Carcinoma	Esophagus	Primary	9.81941	0.451408	0.874004	2	RP11-54H7.4	LTR/ERV1|HERVH-int~LTR7Y|13|109265521|109271116	chr13	109266393	109275084	*	*	ENSG00000275216.1	lincRNA	lincRNA
trans2f728ad81a1ee980	Brain Lower Grade Glioma	Brain	Primary	11.1357	0.73553	1.76621	2	FLJ16779	LTR/ERVL-MaLR|MLT1C2|20|63258112|63258463	chr20	63254581	63261764	*	*	ENSG00000275620.1	antisense	antisense
trans5250daaceb366920	Testicular Germ Cell Tumors	Testis	Primary	8.27247	0.138169	0.226504	3	AC005062.2	LTR/ERVL-MaLR|MLT1J2|7|20007149|20007559;LTR/ERVL|ERV3-16A3_I-int|7|20045336|20045899	chr7	20006751	20045561	-	-	ENSG00000243004.5	sense_overlapping	sense_overlapping
transd037193613e79cf3	Uterine Carcinosarcoma	Uterus	Primary	2.64936	0.876333	0	3	DSCR4	LTR/ERVL|MLT2C1|21|38120215|38120578;LTR/ERVL|LTR16A|21|38121048|38121185;LTR/ERV1|LTR9|21|38121187|38121602	chr21	38006532	38121395	-	-	ENSG00000184029.9	protein_coding	protein_coding
trans83198a2952d21aa0	Skin Cutaneous Melanoma	Skin	Primary	18.7672	2.54128	1.65431	14	ADGRG1	LTR/ERV1|LTR78B|16|57665497|57666359	chr16	57628176	57665571	+	+	ENSG00000205336.11	protein_coding	protein_coding
trans869591ebc540bdee	Testicular Germ Cell Tumors	Testis	Primary	8.1805	0.127734	0.252887	4	MIR520H	LTR/ERVK|LTR13|19|53745804|53746838	chr19	53742209	53748312	*	*	ENSG00000207861.1	miRNA	miRNA
trans333de72f32d9d72e	Kidney Renal Papillary Cell Carcinoma	Kidney	Primary	9.64959	0.431096	1.01141	2	CTD-2503O16.4	LTR/ERVL-MaLR|MLT1I|5|74975430|74975818	chr5	74948101	74975755	*	*	ENSG00000249856.1	lincRNA	lincRNA
trans43f6b49c70eda026	Colon Adenocarcinoma	Colorectal	Primary	31.6708	5.96563	6.81213	3	DMBT1	LTR/ERVL|LTR86A2|10|122578088|122578358	chr10	122577817	122578760	*	*	ENSG00000187908.15	protein_coding	protein_coding
trans3785035165bc5fd9	Lung Squamous Cell Carcinoma	Lung	Primary	1.12718	0	0	2	RP11-382A18.3	LTR/ERVL-MaLR|MLT1G1|8|127289762|127290390	chr8	127289679	127312158	*	*	ENSG00000271509.1	processed_pseudogene	processed_pseudogene
trans7244bc60038d13ed	Esophageal Carcinoma	Esophagus	Primary	34.7806	6.86386	3.92097	3	PLAUR	LTR/ERV1|LTR19A|19|43648362|43648413	chr19	43648310	43655460	*	*	ENSG00000011422.11	protein_coding	protein_coding
trans5c04f9ca1aaa43f0	Kidney Renal Papillary Cell Carcinoma	Kidney	Primary	13.1935	1.22117	4.22593	4	C1orf186	LTR/ERV1|Harlequin-int~LTR2B|1|206054886|206058912	chr1	206035210	206057323	*	*	ENSG00000263961.6	protein_coding	protein_coding
trans1976eac65f6bec3a	Pheochromocytoma and Paraganglioma	Adrenal Gland	Primary	11.6423	0.990519	0.476392	14	TIAM1	LTR/ERVL-MaLR|MLT1A|21|31165287|31165663	chr21	31118442	31165661	-	-	ENSG00000156299.12	protein_coding	protein_coding
trans3792b226d2b1df53	Esophageal Carcinoma	Esophagus	Primary	1.08076	0	0.00719146	1	NA	LTR/ERVL-MaLR|MLT1D|5|104125722|104126150;LTR/ERVL-MaLR|MLT1A1|5|104129715|104130104	chr5	104125447	104130924	*	*	NA	NA	NA
transd5f50e32cb8cc4a6	Lymphoid Neoplasm Diffuse Large B-cell Lymphoma	Lymph Nodes	Primary	17.593	2.28742	0.95867	2	NA	LTR/ERVL-MaLR|MLT1K|16|21390685|21390777	chr16	21390646	21397638	*	*	NA	NA	NA
transcd389d9ab5403c0f	Uveal Melanoma	Eye	Primary	119.029	33.9852	NA	2	AP000350.10	LTR/ERVL-MaLR|MLT1E1|22|23891139|23891668;LTR/ERV1|LTR19A|22|23892306|23892720	chr22	23891185	23895173	*	*	ENSG00000251357.4	protein_coding	protein_coding
trans3114531fe26d22a4	Testicular Germ Cell Tumors	Testis	Primary	9.16177	0.380351	1.85481	5	PRCD	LTR/ERVL-MaLR|THE1B|17|76564566|76564680	chr17	76521670	76565347	*	*	ENSG00000214140.10	protein_coding	protein_coding
trans3849b14685857cde	Prostate Adenocarcinoma	Prostate	Primary	1.78321	0	0	3	PCAT14	LTR/ERVK|HERVK-int~LTR5_Hs|22|23536062|23537205;LTR/ERVK|HERVK-int~LTR5B|22|23537740|23546004	chr22	23536930	23544250	+	+	ENSG00000280623.1	lincRNA	lincRNA
trans0ee92152ab410860	Testicular Germ Cell Tumors	Testis	Primary	12.1639	1.00834	1.96615	6	LINC01160	LTR/ERVL|MER21B|1|111599505|111599754;LTR/ERVL-MaLR|MSTB|1|111599755|111600184	chr1	111599428	111608405	-	-	ENSG00000231346.5	lincRNA	lincRNA
trans393293fe2dbd6609	Lung Adenocarcinoma	Lung	Primary	1.77404	0.041853	0.115431	2	AC098592.7	LTR/ERVL|MER70B|7|16915696|16916121;LTR/ERV1|LTR78|7|16916122|16916862	chr7	16916039	16958060	*	*	ENSG00000223867.1	processed_pseudogene	processed_pseudogene
trans96232a44d5dc6cfc	Uveal Melanoma	Eye	Primary	7.43008	0	NA	2	NA	LTR/ERVK|HERVK-int~LTR5_Hs|7|4583400|4599422;LTR/ERVK|LTR5_Hs|7|4599433|4600400	chr7	4593975	4599771	*	*	NA	NA	NA
trans85396592e026d5ff	Uveal Melanoma	Eye	Primary	9.82348	0.493903	NA	7	AC104667.3	LTR/Gypsy|LTR81A|2|237591838|237591969	chr2	237574324	237592107	-	-	ENSG00000234949.2	antisense	antisense
transb892c133dcfecb86	Brain Lower Grade Glioma	Brain	Primary	34.0158	6.73008	6.59569	3	MARCKS	LTR/ERVL|MLT2B2|6|113868078|113868554;LTR/ERV1|MER66B|6|113868985|113869044;LTR/ERVL-MaLR|THE1B|6|113869354|113869688;LTR/ERVL-MaLR|MLT1G|6|113873036|113873571	chr6	113862435	113873381	-	-	ENSG00000277443.1	protein_coding	protein_coding
trans5c04f9ca1aaa43f0	Ovarian Serous Cystadenocarcinoma	Ovary	Primary	13.0323	1.22117	0.0302856	4	C1orf186	LTR/ERV1|Harlequin-int~LTR2B|1|206054886|206058912	chr1	206035210	206057323	*	*	ENSG00000263961.6	protein_coding	protein_coding
trans16cb9e3d5da28be8	Colon Adenocarcinoma	Colorectal	Primary	97.6573	27.8066	30.5347	3	RBCK1	LTR/ERVL-MaLR|MLT1J|20|410265|410665	chr20	408031	410763	+	+	ENSG00000125826.19	protein_coding	protein_coding
trans9888d75a8de3e698	Head and Neck Squamous Cell Carcinoma	Head and Neck	Primary	13.6082	1.36923	1.53874	2	NA	LTR/ERV1|HERVH-int~LTR7Y|4|182814310|182818919	chr4	182815005	182816735	*	*	NA	NA	NA
transcf9b06aa1f00b766	Uveal Melanoma	Eye	Primary	7.93455	0.11484	NA	4	NA	LTR/ERVL-MaLR|MLT1I|14|34126176|34126447	chr14	34092272	34169648	*	*	NA	NA	NA
trans742dc10992ff885a	Ovarian Serous Cystadenocarcinoma	Ovary	Primary	2.19252	0.0411442	0.0217871	8	DNAJB13	LTR/ERVL|LTR16B1|11|73957783|73958194	chr11	73957672	73970719	*	+	ENSG00000187726.8	protein_coding	protein_coding
trans3980d1d38d1f128b	Testicular Germ Cell Tumors	Testis	Primary	4.95207	0.0238501	0.056518	2	CTC-254B4.1	LTR/ERV1|HERVH-int~LTR7|5|106978588|106984086	chr5	106979163	106981931	*	*	ENSG00000251027.1	lincRNA	lincRNA
trans3989a7e5bc009fad	Pheochromocytoma and Paraganglioma	Adrenal Gland	Primary	1.72032	0.0288756	0.0774512	2	HMGB1P28	LTR/ERVL|LTR50|4|41826422|41826932	chr4	41826548	41843106	*	*	ENSG00000249745.1	processed_pseudogene	processed_pseudogene
trans39afe5d4668736c3	Testicular Germ Cell Tumors	Testis	Primary	32.0886	0.0261708	0.102419	2	NA	LTR/ERV1|HERVH-int~LTR7|6|94553919|94559610	chr6	94554990	94559195	*	*	NA	NA	NA
trans2ddfe63fb79d3158	Testicular Germ Cell Tumors	Testis	Primary	16.3352	2.05597	2.75122	2	NA	LTR/ERV1|LTR7Y|3|187185155|187185626	chr3	187185183	187185446	*	*	NA	NA	NA
trans39c30787d935b53a	Testicular Germ Cell Tumors	Testis	Primary	13.1368	0.131738	0.247542	1	NA	LTR/ERV1|LTR7|21|44341537|44341947	chr21	44341515	44341998	*	*	NA	NA	NA
transbfb8b236f0924762	Testicular Germ Cell Tumors	Testis	Primary	18.365	2.57721	0.655889	23	ATP12A	LTR/Gypsy?|LTR85a|13|24711832|24711972	chr13	24680425	24712553	+	+	ENSG00000075673.11	protein_coding	protein_coding
transa88d0f27c3605542	Sarcoma	Soft Tissue	Primary	16.1628	2.22053	NA	3	CH17-13I23.3	LTR/ERVL-MaLR|MLT1J2|1|143401462|143401793	chr1	143401196	143424875	-	-	ENSG00000277702.1	unprocessed_pseudogene	unprocessed_pseudogene
trans7f04408b321f5dd5	Testicular Germ Cell Tumors	Testis	Primary	7.98972	0.140707	0.0507509	5	A2ML1-AS2	LTR/ERV1|HERVH-int~LTR7|12|8804879|8810577;LTR/ERV1|LTR8|12|8820734|8821194	chr12	8805977	8821087	*	*	ENSG00000256904.1	antisense	antisense
trans67aebccd85827d83	Uveal Melanoma	Eye	Primary	7.29412	0.00737195	NA	2	NA	LTR/ERVK|LTR5_Hs|7|4582426|4583393;LTR/ERVK|HERVK-int~LTR5_Hs|7|4583400|4599422;LTR/ERVK|LTR5_Hs|7|4599433|4600400	chr7	4583106	4600155	*	*	NA	NA	NA
transbf5337a0cb946453	Skin Cutaneous Melanoma	Skin	Primary	16.3059	2.08487	2.39864	2	NA	LTR/ERV1|MER39|1|235872320|235872648	chr1	235872320	235872726	*	*	NA	NA	NA
trans766dee31a0940aab	Stomach Adenocarcinoma	Stomach	Primary	14.6778	1.68362	3.26963	3	PACS1	LTR/ERVL-MaLR|MLT1F|11|66172994|66173027	chr11	66172993	66180440	*	*	ENSG00000175115.11	protein_coding	protein_coding
trans2cbca579c257de8d	Uveal Melanoma	Eye	Primary	35.8199	7.48189	NA	2	PNMA6A	LTR/ERV1|MER65A|X|153070070|153070527;LTR/Gypsy|MamGyp-int|X|153073062|153074019	chrX	153070085	153074848	*	*	ENSG00000235961.5	protein_coding	protein_coding
trans0a799d46adeab61a	Testicular Germ Cell Tumors	Testis	Primary	7.22559	0	0	2	LINC00371	LTR/ERV1|HERVH-int~LTR7|13|51169866|51175006	chr13	51170048	51174991	*	*	ENSG00000226792.6	lincRNA	lincRNA
trans7f0d1b0288039995	Skin Cutaneous Melanoma	Skin	Primary	8.81023	0.33373	0.217389	4	VLDLR	LTR/ERVL-MaLR|THE1B~THE1B-int|9|2665636|2668053;LTR/ERVL-MaLR|MLT1A1|9|2731878|2732255	chr9	2652926	2732146	*	*	ENSG00000147852.15	protein_coding	protein_coding
trans3a23b97027d96a39	Liver Hepatocellular Carcinoma	Liver	Primary	8.34936	0.414527	0	2	LINC01419	LTR/ERV1|LTR12E|8|83402758|83404051;LTR/ERV1|LTR37-int|8|83404052|83404212;LTR/ERV1|LTR37-int|8|83404495|83407719;LTR/ERV1|LTR37-int|8|83407842|83408895	chr8	83403732	83408895	*	*	ENSG00000253898.1	lincRNA	lincRNA
trans67dd30047021efbb	Kidney Renal Clear Cell Carcinoma	Kidney	Primary	13.1243	1.32505	3.17983	2	NA	LTR/ERV1|LTR2B|19|20432121|20432598	chr19	20408999	20432134	*	*	NA	NA	NA
transfdd822ebe79c3afa	Ovarian Serous Cystadenocarcinoma	Ovary	Primary	40.2808	8.86362	5.95404	6	YWHAZ	LTR/ERV1|MER34B-int|8|100919659|100920019	chr8	100919158	100953291	-	-	ENSG00000164924.17	protein_coding	protein_coding
transb7cac9131cc9e03b	Pheochromocytoma and Paraganglioma	Adrenal Gland	Primary	9.15235	0.163756	0.546139	23	EGFLAM	LTR/ERVL-MaLR|MLT1H|5|38466128|38466632	chr5	38258019	38466912	+	+	ENSG00000164318.17	protein_coding	protein_coding
trans3b78edbfdcefdf0b	Pheochromocytoma and Paraganglioma	Adrenal Gland	Primary	1.7633	0.0371767	0.0324313	2	RP11-227F19.1	LTR/ERVL-MaLR|THE1B|4|41801850|41802061	chr4	41801815	41804513	*	*	ENSG00000250467.1	antisense	antisense
transe63ccea43bef1b4d	Ovarian Serous Cystadenocarcinoma	Ovary	Primary	15.2099	2.2673	1.6159	2	LINC00665	LTR/ERV1|LTR6B|19|36324873|36325429;LTR/ERV1|HERVS71-int~LTR6B|19|36327346|36331043	chr19	36324894	36330997	*	*	ENSG00000232677.6	lincRNA	lincRNA
trans3b7d8adf021b43de	Adrenocortical Carcinoma	Adrenal Gland	Primary	0.19437	0.0506113	0.0598611	4	LINC01587	LTR/ERV1|MER31-int~MER34|4|5525246|5526095	chr4	5518238	5527796	+	+	ENSG00000082929.8	processed_transcript	lincRNA
trans3b9758607f933900	Testicular Germ Cell Tumors	Testis	Primary	5.70108	0.0472996	0.0799594	2	NA	LTR/ERV1|MER61D|9|39929563|39929739;LTR/ERV1|LTR25-int~MER61D|9|39930029|39933088;LTR/ERV1|LTR25-int|9|39935226|39935853	chr9	39929674	39935993	*	*	NA	NA	NA
transde8eb4e6b7337024	Ovarian Serous Cystadenocarcinoma	Ovary	Primary	8.13209	0.206546	0	2	NA	LTR/ERV1|HERVH-int~LTR7|3|187466298|187472000	chr3	187466340	187470169	*	*	NA	NA	NA
trans65e7423321046b41	Testicular Germ Cell Tumors	Testis	Primary	7.52278	0.080268	0.388386	2	NA	LTR/ERV1|MER61-int~MER61B|7|22801905|22804089;LTR/ERV1|MER61-int~MER61B|7|22805097|22808600	chr7	22802254	22806025	*	*	NA	NA	NA
trans3b7aa2c739a4412f	Cholangiocarcinoma	Bile Duct	Primary	9.81015	0.576259	0.201444	2	RP11-554I8.2	LTR/ERVL-MaLR|MLT1H|10|6737297|6737713	chr10	6736958	6739516	*	*	ENSG00000223784.1	lincRNA	lincRNA
trans3c07989d51248dfa	Skin Cutaneous Melanoma	Skin	Primary	39.3728	1.83919	0.198963	4	RP11-599J14.2	LTR/ERV1|HERVE-int|12|9406304|9406453;LTR/ERV1|HERVE-int|12|9407305|9407906	chr12	9406307	9408671	*	*	ENSG00000256673.1	unprocessed_pseudogene	unprocessed_pseudogene
trans3be36f1c03b11cbd	Mesothelioma	Pleura	Primary	38.0969	8.30413	NA	7	LOX	LTR/ERVL-MaLR|MLT1K|5|122060441|122060917	chr5	122059573	122078638	-	-	ENSG00000113083.12	protein_coding	protein_coding
trans4a7773aa688a478c	Pancreatic Adenocarcinoma	Pancreas	Primary	9.14889	0.434719	0.0519818	8	CEACAM5	LTR/ERV1|MER65-int|19|41770580|41771854;LTR/ERV1|LTR54B|19|41771856|41772234	chr19	41708589	41772208	+	+	ENSG00000105388.15	protein_coding	protein_coding
trans3c07989d51248dfa	Uveal Melanoma	Eye	Primary	10.5855	1.83919	NA	4	RP11-599J14.2	LTR/ERV1|HERVE-int|12|9406304|9406453;LTR/ERV1|HERVE-int|12|9407305|9407906	chr12	9406307	9408671	*	*	ENSG00000256673.1	unprocessed_pseudogene	unprocessed_pseudogene
trans61e1a0df303027d5	Skin Cutaneous Melanoma	Skin	Primary	18.133	2.63217	1.02773	6	RP11-1055B8.2	LTR/ERVL|MLT2D|17|81375748|81376170	chr17	81357252	81380565	-	-	ENSG00000263154.1	lincRNA	lincRNA
trans0b0db045bc668c08	Brain Lower Grade Glioma	Brain	Primary	9.29082	0.469441	1.96147	14	GALNT13	LTR/ERV1|LTR12D|2|153871945|153872416	chr2	153871907	154456140	+	+	ENSG00000144278.14	protein_coding	protein_coding
trans8cd36f63ce1e67bb	Uveal Melanoma	Eye	Primary	12.1876	1.14129	NA	2	C12orf76	LTR/ERV1|LTR8|12|110055530|110055953	chr12	110055458	110057212	*	*	ENSG00000174456.13	protein_coding	protein_coding
transec821eff7e8200a3	Ovarian Serous Cystadenocarcinoma	Ovary	Primary	7.09609	0	0.202129	2	KCNMB2	LTR/ERVL-MaLR|THE1D~THE1D-int|3|178839497|178841831	chr3	178748966	178841618	*	*	ENSG00000197584.11	protein_coding	protein_coding
trans1ea49dad67a4367b	Mesothelioma	Pleura	Primary	23.2435	4.01943	NA	16	MSLN	LTR/ERVL|MER54B|16|760973|761306	chr16	760799	769198	+	+	ENSG00000102854.14	protein_coding	protein_coding
trans42897b020a170afa	Uveal Melanoma	Eye	Primary	15.3751	1.92792	NA	12	BMX	LTR/ERVL-MaLR|THE1B|X|15499073|15499438	chrX	15384804	15499346	-	-	ENSG00000102010.14	protein_coding	protein_coding
trans343ad11af02aee4c	Lung Squamous Cell Carcinoma	Lung	Primary	16.364	2.18425	0.170364	12	SLC2A1-AS1	LTR/ERVL-MaLR|MLT1O|1|42970093|42970492	chr1	42924912	42974302	-	-	ENSG00000227533.5	lincRNA	lincRNA
trans7e25821dd01cca39	Ovarian Serous Cystadenocarcinoma	Ovary	Primary	11.6115	1.00806	0	2	C1orf186	LTR/ERV1|Harlequin-int~LTR2B|1|206054886|206058912	chr1	206056482	206058002	*	*	ENSG00000263961.6	protein_coding	protein_coding
transf03446130afafe94	Sarcoma	Soft Tissue	Primary	31.859	6.5058	NA	6	TNFAIP6	LTR/ERV1|LTR54|2|151380467|151380905;LTR/ERV1|MER39|2|151381022|151381191	chr2	151357527	151381240	+	+	ENSG00000123610.4	protein_coding	protein_coding
trans893bd4098c3c42fe	Bladder Urothelial Carcinoma	Bladder	Primary	31.8206	6.53116	9.27257	5	OAS2	LTR/ERVL|MER21C|12|113011190|113011980	chr12	113005025	113011722	+	+	ENSG00000111335.12	protein_coding	protein_coding
transd42228d1706f0742	Testicular Germ Cell Tumors	Testis	Primary	11.4291	0.982633	1.73548	5	LINC01160	LTR/ERVL-MaLR|MSTB|1|111599755|111600184	chr1	111599798	111608548	-	-	ENSG00000231346.5	lincRNA	lincRNA
trans73c517dea34ba402	Testicular Germ Cell Tumors	Testis	Primary	10.1272	0.678198	1.53207	2	LINC01160	LTR/ERVL|MER21B|1|111598589|111599197	chr1	111598375	111613473	*	*	ENSG00000231346.5	lincRNA	lincRNA
transb7cf4cc15e0701c1	Uveal Melanoma	Eye	Primary	9.70298	0.583503	NA	2	COMT	LTR/ERV1|MER31-int|22|19950382|19951078	chr22	19950665	19952852	*	*	ENSG00000093010.11	protein_coding	protein_coding
transaa75727639b9f319	Glioblastoma Multiforme	Brain	Primary	14.1233	1.64523	2.14848	3	LINC01579	LTR/ERVL-MaLR|MLT1J1-int|15|94064755|94065617;LTR/ERVL-MaLR|MLT1J|15|94066705|94067147	chr15	94064398	94070966	-	-	ENSG00000258754.7	lincRNA	lincRNA
trans1f038a922110fae0	Pheochromocytoma and Paraganglioma	Adrenal Gland	Primary	19.1356	2.95033	0.444555	12	SYT1	LTR/ERVL-MaLR|MLT1A0|12|78955385|78955684	chr12	78864662	79449908	+	+	ENSG00000067715.13	protein_coding	protein_coding
transd44cd4aea58bc92b	Kidney Renal Clear Cell Carcinoma	Kidney	Primary	10.707	0.16338	0.068347	26	ENPP3	LTR/ERVL-MaLR|THE1D|6|131747815|131748199	chr6	131637106	131751328	+	+	ENSG00000154269.14	protein_coding	protein_coding
trans78cdc8db72a12613	Kidney Renal Clear Cell Carcinoma	Kidney	Primary	8.01047	0.217316	0.569581	3	NA	LTR/ERVL-MaLR|MLT1I|13|42485269|42485695	chr13	42435151	42485944	*	*	NA	NA	NA
trans98129942b1880eb1	Testicular Germ Cell Tumors	Testis	Primary	8.84685	0.408609	0.111099	3	NA	LTR/ERV1|LTR7|14|48262396|48262802;LTR/ERV1|HERVH-int~LTR7|14|48263181|48268282	chr14	48262145	48274882	*	*	NA	NA	NA
trans567eb8947a68cf31	Glioblastoma Multiforme	Brain	Primary	11.5858	1.05077	1.75897	15	ADGRG1	LTR/ERV1|LTR78B|16|57665497|57666359	chr16	57639028	57665566	+	+	ENSG00000205336.11	protein_coding	protein_coding
trans7230111a9021f1e3	Uveal Melanoma	Eye	Primary	42.4353	9.91273	NA	22	ABHD12B	LTR/ERVL-MaLR|MLT1A0|14|50904682|50905016	chr14	50903009	50945155	-	-	ENSG00000131969.14	protein_coding	protein_coding
trans3ca6c2f462ef6aa1	Esophageal Carcinoma	Esophagus	Primary	7.99328	0.0184855	0.287419	2	NA	LTR/ERV1|HERVH-int~LTR7Y|1|68386004|68391994	chr1	68387132	68388084	*	*	NA	NA	NA
trans4eb85a0e1f89478d	Skin Cutaneous Melanoma	Skin	Primary	11.5174	1.04195	0.52133	3	RP11-1055B8.2	LTR/ERVL|MLT2D|17|81375748|81376170	chr17	81369483	81379743	*	*	ENSG00000263154.1	lincRNA	lincRNA
trans202177cc3b4f6488	Rectum Adenocarcinoma	Colorectal	Primary	106.796	31.9366	32.7953	8	EIF2S2	LTR/ERV1|LTR9D|20|34091787|34091869	chr20	34091780	34112395	-	-	ENSG00000125977.6	protein_coding	protein_coding
trans102af3e965b1faa5	Testicular Germ Cell Tumors	Testis	Primary	7.00331	0.0203989	0.026731	24	ABHD12B	LTR/ERV1|HERVH-int~LTR7|14|50893162|50896881;LTR/ERVL-MaLR|MLT1A0|14|50904682|50905016	chr14	50894221	50945500	*	*	ENSG00000131969.14	protein_coding	protein_coding
transe54a2558ff64924f	Thymoma	Thymus	Primary	12.9286	1.39322	2.08157	2	CCL25	LTR/ERVL-MaLR|MLT1K|19|8057644|8058065	chr19	8056477	8057848	*	*	ENSG00000131142.13	protein_coding	protein_coding
transa29ed9225cd09b69	Cholangiocarcinoma	Bile Duct	Primary	8.05146	0.243181	0	4	VNN1	LTR/ERVL-MaLR|MLT1B|6|132682335|132682693	chr6	132681905	132687722	-	-	ENSG00000112299.7	protein_coding	protein_coding
trans8936c7e67fedf72c	Kidney Renal Papillary Cell Carcinoma	Kidney	Primary	26.5756	7.46521	7.29027	7	SPON1	LTR/ERVL-MaLR|MSTB2|11|14268266|14268701	chr11	14256124	14268903	+	+	ENSG00000262655.3	protein_coding	protein_coding
transcd5293e0e0b5da7a	Head and Neck Squamous Cell Carcinoma	Head and Neck	Primary	9.06519	0.474404	0.559979	2	NA	LTR/ERV1|HERVH-int~LTR7Y|4|182814310|182818919	chr4	182815535	182815970	*	*	NA	NA	NA
trans33f27447ae441dbd	Brain Lower Grade Glioma	Brain	Primary	15.3151	2.01046	5.01818	2	RP11-517I3.2	LTR/ERVL-MaLR|MLT1N2|5|126495777|126495978	chr5	126495043	126505113	*	*	ENSG00000279118.1	TEC	TEC
transd6423d99c3b5c846	Thyroid Carcinoma	Thyroid	Primary	11.4745	1.29764	3.32809	2	NA	LTR/ERVL-MaLR|THE1B|9|81561019|81561394	chr9	81561224	81573140	*	*	NA	NA	NA
trans547af87f05e9021f	Ovarian Serous Cystadenocarcinoma	Ovary	Primary	10.0489	0.705091	0.0172852	3	NA	LTR/ERV1|LTR2B|13|22880290|22880761;LTR/ERV1|Harlequin-int~LTR2B|13|22883560|22889835;LTR/ERV1|MER4-int~MER4A1|13|22891259|22893203;LTR/ERV1|MER50|13|22893204|22893721;LTR/ERV1|LTR39-int|13|22893754|22894062;LTR/ERV1|MER4C|13|22894085|22894537	chr13	22880313	22894340	*	*	NA	NA	NA
trans01bd0e552198df56	Testicular Germ Cell Tumors	Testis	Primary	10.177	0.740285	2.33892	7	FAM9C	LTR/ERVL-MaLR|THE1B~THE1B-int|X|13061250|13063519	chrX	13038215	13061409	-	-	ENSG00000187268.11	protein_coding	protein_coding
trans3d79b83d9b97c145	Head and Neck Squamous Cell Carcinoma	Head and Neck	Primary	10.0874	0	0.298828	4	RPE65	LTR/ERV1|HERVH-int~LTR7Y|1|68386004|68391994;LTR/ERV1|LTR17|1|68392098|68392789	chr1	68387234	68448846	*	*	ENSG00000116745.6	protein_coding	protein_coding
trans3e3b0b845b5849ef	Uveal Melanoma	Eye	Primary	2.84659	0.0938423	NA	3	NA	LTR/ERV1|LTR12C|21|9659853|9661394	chr21	9658843	9661364	*	*	NA	NA	NA
transa2443c603ffe51f2	Lung Squamous Cell Carcinoma	Lung	Primary	6.94127	0.0394638	0.0766253	2	NA	LTR/ERV1|HERVH-int~LTR7Y|5|136540943|136541750;LTR/ERV1|HERVH-int|5|136541922|136544962;LTR/ERV1|HERVH-int~LTR7|5|136566160|136571245	chr5	136541361	136568553	*	*	NA	NA	NA
trans04bac9f2d3d472f4	Skin Cutaneous Melanoma	Skin	Metastasis	22.8765	4.10145	7.25427	2	P2RX7	LTR/ERVL-MaLR|MLT1H1|12|121185542|121185773	chr12	121184956	121193090	*	*	ENSG00000089041.16	protein_coding	protein_coding
trans75fc59241e2db5db	Skin Cutaneous Melanoma	Skin	Primary	72.9908	20.1965	15.3802	2	FOXRED2	LTR/ERV1|LTR10A|22|36487143|36487638	chr22	36487194	36496951	*	*	ENSG00000100350.14	protein_coding	protein_coding
trans713fc68eb770ff5d	Testicular Germ Cell Tumors	Testis	Primary	9.08867	0.491602	0.0633119	2	NA	LTR/ERVL-MaLR|MLT1F|9|87419296|87419815;LTR/ERVL-MaLR|MLT1N2|9|87419897|87420095;LTR/ERVL-MaLR|THE1D|9|87420391|87420758;LTR/ERV1|MER57B2|9|87423024|87423375	chr9	87419206	87423086	*	*	NA	NA	NA
transee24f75687448a88	Testicular Germ Cell Tumors	Testis	Primary	9.12429	0.500193	1.05438	2	ZNF385D-AS1	LTR/ERV1|MER61-int~MER61A|3|21542642|21543030	chr3	21542755	21579247	*	*	ENSG00000225542.1	antisense	antisense
trans3eb83142870b9928	Lymphoid Neoplasm Diffuse Large B-cell Lymphoma	Lymph Nodes	Primary	3.17057	0.075979	0.491253	2	NA	LTR/ERVL-MaLR|THE1A|20|57483200|57483552	chr20	57483287	57484732	*	*	NA	NA	NA
transe4a909d86c4748ff	Testicular Germ Cell Tumors	Testis	Primary	9.43575	0.5756	0.365781	2	SERPINB9	LTR/ERVL?|LTR89|6|2832275|2832524	chr6	2832332	2889698	*	*	ENSG00000170542.5	protein_coding	protein_coding
trans22c58c5b1db339fd	Testicular Germ Cell Tumors	Testis	Primary	6.84631	0	0.227626	2	RP11-17P16.2	LTR/ERVL-MaLR|THE1D-int|4|67659682|67661263	chr4	67632864	67661246	*	*	ENSG00000270257.1	processed_pseudogene	processed_pseudogene
transd12b7687ae4912ad	Testicular Germ Cell Tumors	Testis	Primary	8.24241	0.310973	0.841883	2	NA	LTR/ERV1|HERVH-int~LTR7|13|42868004|42872703;LTR/ERV1|LTR7|13|42872706|42873158	chr13	42868231	42873183	*	*	NA	NA	NA
transbc963221c9e20afd	Uveal Melanoma	Eye	Primary	8.15556	0.29291	NA	8	RP13-735L24.1	LTR/ERV1|HERVE-int|12|9407305|9407906	chr12	9397063	9407586	-	-	ENSG00000260423.1	lincRNA	lincRNA
trans56bc15fdf5d41a90	Testicular Germ Cell Tumors	Testis	Primary	9.74507	0.660763	0.367598	3	BICD1	LTR/ERVL-MaLR|MLT1A1|12|32222641|32222966	chr12	32106699	32222959	+	+	ENSG00000151746.13	protein_coding	protein_coding
trans3f373706e6c77db8	Esophageal Carcinoma	Esophagus	Primary	1.79604	0	0	2	RP11-297P16.3	LTR/ERV1|HERVH-int~LTR7Y|4|103553770|103559474	chr4	103552126	103553807	*	*	ENSG00000251577.5	antisense	antisense
transcf9df8d37b1575b7	Brain Lower Grade Glioma	Brain	Primary	6.83828	2.20383	0.631586	11	EIF5	LTR/ERV1|MER65A|14|103345006|103345333	chr14	103333154	103345022	+	+	ENSG00000100664.10	protein_coding	protein_coding
trans72058e33ad416969	Ovarian Serous Cystadenocarcinoma	Ovary	Primary	9.94384	0.714105	0.279698	10	IL13RA1	LTR/ERV1|LOR1a|X|118804807|118805304	chrX	118741016	118804988	+	+	ENSG00000131724.10	protein_coding	protein_coding
transc0c4da14ac4c464e	Ovarian Serous Cystadenocarcinoma	Ovary	Primary	8.42473	0.36392	0.214307	2	NA	LTR/ERV1|PABL_A|14|19092954|19093152	chr14	19092939	19104277	*	*	NA	NA	NA
trans97b43a13b86aac49	Lymphoid Neoplasm Diffuse Large B-cell Lymphoma	Lymph Nodes	Primary	27.1289	5.42601	6.02885	7	PCED1B	LTR/ERV1|LTR8|12|47205794|47206481	chr12	47205898	47236658	-	-	ENSG00000179715.12	protein_coding	protein_coding
trans88392a185ec8532d	Sarcoma	Soft Tissue	Primary	31.5135	6.75026	NA	15	P4HA2-AS1	LTR/ERVL-MaLR|MLT1A0|5|132191537|132191583	chr5	132191533	132227990	-	-	ENSG00000237714.1	antisense	antisense
transf769b1909d76f6ed	Esophageal Carcinoma	Esophagus	Primary	14.8142	1.94965	3.99179	7	RP11-1223D19.1	LTR/ERV1|LTR12F|2|110424711|110425162	chr2	110085116	110425119	-	-	ENSG00000261760.6	lincRNA	lincRNA
transd7df7c7e30fae892	Skin Cutaneous Melanoma	Skin	Primary	24.3894	4.63197	3.16232	3	PIK3CD-AS2	LTR/ERVL-MaLR|MLT1F1|1|9680798|9681231	chr1	9672706	9687574	-	-	ENSG00000231789.2	antisense	antisense
trans7e25821dd01cca39	Uterine Corpus Endometrial Carcinoma	Uterus	Primary	11.101	1.00806	3.37987	2	C1orf186	LTR/ERV1|Harlequin-int~LTR2B|1|206054886|206058912	chr1	206056482	206058002	*	*	ENSG00000263961.6	protein_coding	protein_coding
trans04b631de9ba0dcaa	Pancreatic Adenocarcinoma	Pancreas	Primary	9.59153	0.643205	0.092675	2	NA	LTR/ERV1|HERVH-int~LTR7Y|X|4540474|4546320	chrX	4541446	4542986	*	*	NA	NA	NA
trans3029e562e2dd6f3e	Brain Lower Grade Glioma	Brain	Primary	39.2401	9.20187	6.79622	15	ADGRG1	LTR/ERV1|LTR78B|16|57665497|57666359	chr16	57628705	57665571	+	+	ENSG00000205336.11	protein_coding	protein_coding
transa0f136b4b15fd5b5	Mesothelioma	Pleura	Primary	8.08463	0.294901	NA	2	NA	LTR?|MamRep605|7|67670916|67671382	chr7	67671022	67681869	*	*	NA	NA	NA
transfb51142ed355ed28	Kidney Renal Clear Cell Carcinoma	Kidney	Primary	12.2341	1.2971	1.41746	3	NA	LTR|MamRep1527|10|84165054|84165868;LTR/ERV1|LTR2B|10|84167188|84167669;LTR/ERV1|Harlequin-int|10|84168503|84170027;LTR/ERV1|LTR2B|10|84171987|84172465	chr10	84164688	84172137	*	*	NA	NA	NA
transc914ded0ecb34444	Lymphoid Neoplasm Diffuse Large B-cell Lymphoma	Lymph Nodes	Primary	6.82532	0.493909	0.43848	1	DTNBP1	LTR/ERV1|MER41-int|6|15558567|15558816	chr6	15558532	15560055	*	+	ENSG00000047579.19	protein_coding	protein_coding
transb9874998623268a4	Uveal Melanoma	Eye	Primary	1.62692	1.16196e-07	NA	25	ENPP7	LTR/ERVL|MLT2C1|17|79769820|79770124;LTR/ERVL|LTR16|17|79900715|79900825;LTR/ERVL-MaLR|MLT1H|17|79938643|79939068	chr17	79711159	80013614	*	*	ENSG00000182156.9	protein_coding	protein_coding
trans115149aa1e6964be	Rectum Adenocarcinoma	Colorectal	Primary	7.482	0.313269	0.434124	3	NTMT1	LTR/ERVL-MaLR|MLT1A0|9|129608433|129608584	chr9	129608389	129634075	*	*	ENSG00000148335.14	protein_coding	protein_coding
trans1313bbffa49cca6f	Testicular Germ Cell Tumors	Testis	Primary	29.6173	6.23607	6.77703	2	NA	LTR/ERVK|HERVK-int~LTR5_Hs|3|101691893|101701013	chr3	101697909	101700925	*	*	NA	NA	NA
transb8bdde5859db9454	Brain Lower Grade Glioma	Brain	Primary	10.8683	0.964807	0.703452	2	RP5-1056H1.2	LTR/ERVL-MaLR|MLT1I|20|6069667|6070040;LTR/ERVL-MaLR|MLT1C2|20|6070241|6070506	chr20	6062927	6070603	*	*	ENSG00000278192.1	lincRNA	lincRNA
trans97a79e9a8bf9e75b	Kidney Renal Papillary Cell Carcinoma	Kidney	Primary	13.0901	1.52809	2.62512	4	C1orf186	LTR/ERV1|Harlequin-int~LTR2B|1|206054886|206058912	chr1	206055428	206061896	*	*	ENSG00000263961.6	protein_coding	protein_coding
trans4a824fef38dc19ed	Cholangiocarcinoma	Bile Duct	Primary	55.5416	14.6524	0.552672	15	ITIH5	LTR/ERVL-MaLR|MLT1A|10|7560150|7560306	chr10	7560043	7667020	-	-	ENSG00000123243.14	protein_coding	protein_coding
transf4f7c999e2640e53	Uveal Melanoma	Eye	Primary	10.3712	0.852195	NA	2	NA	LTR/ERVL-MaLR|MSTA|KI270706.1|64349|64638;LTR/ERVL-MaLR|MSTA|KI270706.1|66131|66477	chr1_KI270706v1_random	64296	67051	*	*	NA	NA	NA
transcd389d9ab5403c0f	Uterine Corpus Endometrial Carcinoma	Uterus	Primary	109.625	33.9852	35.9244	2	AP000350.10	LTR/ERVL-MaLR|MLT1E1|22|23891139|23891668;LTR/ERV1|LTR19A|22|23892306|23892720	chr22	23891185	23895173	*	*	ENSG00000251357.4	protein_coding	protein_coding
transc30279e1dc036af2	Uveal Melanoma	Eye	Primary	40.2768	9.63349	NA	2	RP11-770G2.2	LTR/ERV1|MER49|11|65773823|65774235;LTR/ERVL|ERVL-E-int|11|65774236|65774298;LTR/ERVL-MaLR|MLT1I|11|65774305|65774412	chr11	65768811	65774522	*	*	ENSG00000255557.1	lincRNA	lincRNA
trans34d544f8cd0f290b	Kidney Renal Clear Cell Carcinoma	Kidney	Primary	10.6769	0.930797	0.0301836	4	FABP7	LTR/ERV1|HERVE_a-int~LTR2|6|122745509|122749262	chr6	122748936	122784071	+	+	ENSG00000164434.11	protein_coding	protein_coding
trans7ce442f47379f901	Skin Cutaneous Melanoma	Skin	Primary	22.3205	4.09854	4.0538	23	ABHD12B	LTR/ERVL-MaLR|MLT1A0|14|50904682|50905016;LTR/Gypsy?|LTR88b|14|50955550|50956103	chr14	50903009	50956775	-	-	ENSG00000131969.14	protein_coding	protein_coding
trans43f6b49c70eda026	Esophageal Carcinoma	Esophagus	Primary	28.5863	5.96563	0.0926736	3	DMBT1	LTR/ERVL|LTR86A2|10|122578088|122578358	chr10	122577817	122578760	*	*	ENSG00000187908.15	protein_coding	protein_coding
trans8c10d64d359a7fb8	Prostate Adenocarcinoma	Prostate	Primary	18.2895	2.95014	4.69441	5	DRAIC	LTR/ERV1|LTR48B|15|69570551|69570782;LTR/ERVL|MLT2C2|15|69571043|69571567	chr15	69468172	69571440	+	+	ENSG00000245750.7	lincRNA	lincRNA
trans18b3ee883d8710c8	Testicular Germ Cell Tumors	Testis	Primary	6.68359	0	0.243815	2	ENAH	LTR/ERVL|MER21B|1|225614359|225614834	chr1	225614709	225615435	*	*	ENSG00000154380.17	protein_coding	protein_coding
transad523c4dc4093845	Testicular Germ Cell Tumors	Testis	Primary	6.68281	0.212203	0	2	TPTEP1	LTR/ERV1|HERVFH21-int~LTR7Y|22|16611308|16615147	chr22	16611443	16615081	*	*	ENSG00000100181.21	lincRNA	lincRNA
transa1cd698f4536f0b7	Cholangiocarcinoma	Bile Duct	Primary	50.1065	12.9294	0.514966	14	ITIH5	LTR/ERVL-MaLR|MLT1A|10|7559625|7559844;LTR/ERVL-MaLR|MLT1A|10|7560150|7560306	chr10	7558480	7666989	-	-	ENSG00000123243.14	protein_coding	protein_coding
trans0eea881ecfea4311	Sarcoma	Soft Tissue	Primary	17.2986	3.42661	NA	3	NA	LTR/ERVL-MaLR|MLT1H1|1|143382425|143382936	chr1	143382497	143420207	-	-	NA	NA	NA
trans331534ad189a541d	Uterine Corpus Endometrial Carcinoma	Uterus	Primary	35.8261	8.29522	4.29947	3	PARP1	LTR/ERVL-MaLR|MLT1O|1|226363461|226363822	chr1	226360692	226363532	-	-	ENSG00000143799.12	protein_coding	protein_coding
trans3fb12f3d0338e981	Cholangiocarcinoma	Bile Duct	Primary	0.724498	0	0	3	NA	LTR/ERV1|MER57-int|GL000214.1|35169|35279	chrUn_GL000214v1	35277	35671	*	*	NA	NA	NA
trans9577c6c503cb12da	Thymoma	Thymus	Primary	25.9964	5.25461	7.24748	4	LA16c-380H5.3	LTR?|MamRep1151|16|3001936|3002124	chr16	3000334	3001997	+	+	ENSG00000270168.2	protein_coding	protein_coding
trans40a841b4f01e78f8	Mesothelioma	Pleura	Primary	3.80813	0.136489	NA	5	RP11-298A8.2	LTR/ERV1|MER39B|X|140966453|140966893;LTR/ERV1|MER4-int~MER4A|X|140996209|140997386;LTR/ERV1|LTR10E|X|140997391|140997927	chrX	140966467	141003583	+	+	ENSG00000229269.1	lincRNA	lincRNA
trans74bf957bb864f247	Stomach Adenocarcinoma	Stomach	Primary	19.0039	3.20404	0.877244	7	DNAJC15	LTR/ERV1|HERVH-int~LTR7B|13|43059672|43061604;LTR/ERVL|LTR33|13|43062026|43062495	chr13	43059695	43107547	+	+	ENSG00000120675.5	protein_coding	protein_coding
transcbfa5abe68bd4da9	Uveal Melanoma	Eye	Primary	6.6101	0	NA	2	C12orf76	LTR/ERV1|LTR7B|12|110049329|110049773	chr12	110049373	110049768	*	*	ENSG00000174456.13	protein_coding	protein_coding
transda2e289bf98ce4ac	Testicular Germ Cell Tumors	Testis	Primary	12.3941	1.40022	1.07632	2	WBSCR16	LTR/ERVL-MaLR|MLT1F|7|75030490|75030883	chr7	75028296	75031511	*	*	ENSG00000274523.4	protein_coding	protein_coding
trans0c46652076bae965	Testicular Germ Cell Tumors	Testis	Primary	7.08924	0.107368	0.191347	3	NA	LTR/ERVL-MaLR|MLT1C2|8|141197160|141197602	chr8	141194204	141202855	*	*	NA	NA	NA
trans83198a2952d21aa0	Brain Lower Grade Glioma	Brain	Primary	16.599	2.54128	3.74252	14	ADGRG1	LTR/ERV1|LTR78B|16|57665497|57666359	chr16	57628176	57665571	+	+	ENSG00000205336.11	protein_coding	protein_coding
trans42c6cf1574e07bd2	Ovarian Serous Cystadenocarcinoma	Ovary	Primary	7.36765	0.17412	0	2	CH17-340M24.3	LTR/ERVL-MaLR|MLT1C|X|154424336|154424711	chrX	154424387	154428539	*	*	ENSG00000197180.2	lincRNA	lincRNA
transcd3ec8265a83ca1a	Glioblastoma Multiforme	Brain	Primary	115.433	36.6683	31.3131	6	RP11-514P8.7	LTR/ERV1|PABL_B-int|7|102566591|102566750;LTR/ERVL-MaLR|MSTA|7|102566918|102567301	chr7	102566713	102572547	-	-	ENSG00000270249.1	protein_coding	protein_coding
transf8332e3751f1105d	Brain Lower Grade Glioma	Brain	Primary	9.1779	0.600062	2.51456	2	BMP2K	LTR/ERV1|MER90|4|78866879|78866930;LTR/ERV1|MER90|4|78867200|78867485	chr4	78687804	78867872	*	*	ENSG00000138756.17	protein_coding	protein_coding
trans410dd0946c135f1b	Head and Neck Squamous Cell Carcinoma	Head and Neck	Primary	4.03134	0.060697	0.285236	3	NA	LTR/ERV1|HERVH-int~LTR7Y|13|109265521|109271116	chr13	109266192	109266917	*	*	NA	NA	NA
trans9d68bf9d9365cbbe	Esophageal Carcinoma	Esophagus	Primary	6.58221	0	0	2	NA	LTR/ERV1|HERVH-int~LTR7Y|5|136540943|136541750;LTR/ERV1|HERVH-int~LTR7Y|5|136546329|136547136	chr5	136541211	136547125	*	*	NA	NA	NA
transe16ddfc2521c239f	Ovarian Serous Cystadenocarcinoma	Ovary	Primary	7.21331	0.142377	1.57967	4	BTN3A2	LTR/ERVL|MER70-int|6|26353815|26354375	chr6	26349496	26378311	*	*	ENSG00000186470.13	protein_coding	protein_coding
trans4193feeeaae4510c	Pheochromocytoma and Paraganglioma	Adrenal Gland	Primary	1.11066	0	0	5	AP000593.6	LTR/ERVL-MaLR|THE1B|11|72252592|72252896	chr11	72252754	72302324	*	*	ENSG00000213365.3	processed_pseudogene	processed_pseudogene
trans41b4b6913697c0e8	Mesothelioma	Pleura	Primary	54.2604	0.876398	NA	1	NA	LTR/ERVL-MaLR|MLT1I-int|1|160869492|160869785	chr1	160868698	160869924	*	*	NA	NA	NA
transdf3858f900182dfb	Pheochromocytoma and Paraganglioma	Adrenal Gland	Primary	12.1797	1.35914	0.18299	2	CDS2	LTR/Gypsy|MamGypLTR1b|20|5199033|5199294	chr20	5195020	5276519	*	*	ENSG00000101290.13	protein_coding	protein_coding
trans4220274f72a00c41	Uveal Melanoma	Eye	Primary	1.08853	0	NA	4	FAM157C	LTR/ERV1|MER57A-int~MER57C2|16|90109722|90110518;LTR/ERV1|LTR56|16|90110562|90110748	chr16	90110372	90131941	-	-	ENSG00000260528.3	lincRNA	lincRNA
transc75c56477aaeb819	Thymoma	Thymus	Primary	7.6609	0.985368	0	2	NA	LTR/ERVL|MLT2A1|18|62395326|62395767	chr18	62395538	62410021	*	*	NA	NA	NA
transddd502bf72398f20	Ovarian Serous Cystadenocarcinoma	Ovary	Primary	8.23546	0.385431	0	3	SLC25A3P1	LTR/ERV1|HERVH-int~LTR49|1|53424337|53429599	chr1	53413164	53426804	-	-	ENSG00000236253.7	transcribed_processed_pseudogene	processed_transcript
trans4a8bb94562cff841	Testicular Germ Cell Tumors	Testis	Primary	6.55176	0	1.93353e-09	2	UMPS	LTR/Gypsy|MamGypLTR2b|3|124748521|124749280	chr3	124739526	124749396	*	*	ENSG00000114491.13	protein_coding	protein_coding
trans51283ac2e530fb82	Testicular Germ Cell Tumors	Testis	Primary	8.08434	0.351657	0.524546	2	NA	LTR/ERVL|MLT2A1|X|78062813|78063242	chrX	78060100	78063100	*	*	NA	NA	NA
trans4262fd0e44277242	Testicular Germ Cell Tumors	Testis	Primary	4.71134	0.0130505	0	3	PCDH11X	LTR/ERV1|HERVH-int~LTR7|X|92100240|92101062;LTR/ERV1|HERVH-int~LTR7Y|X|92101064|92105917	chrX	92100550	92105800	*	*	ENSG00000102290.21	protein_coding	protein_coding
trans42f73e5d477b1b61	Testicular Germ Cell Tumors	Testis	Primary	3.28624	0.0179251	0.272692	2	CTD-2306M5.1	LTR/ERV1|LTR7|5|25445822|25446221	chr5	25433831	25446052	*	*	ENSG00000248605.5	lincRNA	lincRNA
transdf234c2e79eb251f	Thyroid Carcinoma	Thyroid	Primary	8.82738	0.531355	0.27011	4	DCSTAMP	LTR/ERVL-MaLR|MLT1D|8|104349781|104350221;LTR/ERV1|MER66D|8|104351379|104351909	chr8	104339063	104356894	*	*	ENSG00000164935.6	protein_coding	protein_coding
trans92289493817e2f5a	Lung Squamous Cell Carcinoma	Lung	Primary	84.2167	25.3021	18.522	3	RP5-850E9.3	LTR/ERVL-MaLR|MLT1H|20|647365|647847;LTR/ERVL-MaLR|MLT1L|20|647850|648370;LTR/ERVL-MaLR|MLT1L|20|654769|654893	chr20	646626	654925	-	-	ENSG00000270299.1	protein_coding	protein_coding
trans819543e5285b7e5c	Prostate Adenocarcinoma	Prostate	Primary	7.8592	0.481425	1.90763	2	COMT	LTR/ERV1|MER31-int~MER67A|22|19942676|19943365	chr22	19943207	19952061	*	*	ENSG00000093010.11	protein_coding	protein_coding
trans50a0c11e8afb5b69	Testicular Germ Cell Tumors	Testis	Primary	8.39964	0.435248	0	3	HLA-DPB2	LTR/ERV1|HUERS-P3b-int~LTR9C|6|33117740|33118640	chr6	33116625	33118411	*	*	ENSG00000224557.7	transcribed_unprocessed_pseudogene	transcribed_unprocessed_pseudogene
trans4e112b9ac91281e4	Testicular Germ Cell Tumors	Testis	Primary	7.15477	0.144188	0	2	NA	LTR/ERV1|LTR7|1|212910008|212910445;LTR/ERV1|HERVH-int~LTR7Y|1|212910475|212914683	chr1	212910008	212914339	*	*	NA	NA	NA
trans622cc7187c5ebc26	Kidney Renal Clear Cell Carcinoma	Kidney	Primary	50.5502	13.3791	0.54572	2	UBE2D2	LTR/ERV1|LTR12C|5|139549171|139550957	chr5	139549998	139551102	*	*	ENSG00000131508.15	protein_coding	protein_coding
trans2a83f4b44469d6ca	Kidney Renal Papillary Cell Carcinoma	Kidney	Primary	65.2827	18.5228	21.7103	12	AKR1C1	LTR/ERVL|LTR84a|10|4943962|4943989;LTR/ERVL-MaLR|MSTA|10|4943990|4944407	chr10	4943987	4980726	+	+	ENSG00000187134.12	protein_coding	protein_coding
trans15ead26bc041e52b	Testicular Germ Cell Tumors	Testis	Primary	8.05176	0.358894	1.02916	2	NA	LTR/ERV1|HERVH-int~LTR7Y|1|230601216|230609094	chr1	230601316	230608984	*	*	NA	NA	NA
trans44b1b530ad7168d5	Kidney Renal Clear Cell Carcinoma	Kidney	Primary	12.9014	1.5882	3.95988	2	LINC01426	LTR/ERVL-MaLR|THE1B|21|34781911|34782274	chr21	34782124	34782818	*	*	ENSG00000234380.1	antisense	antisense
trans94a425f54092c264	Testicular Germ Cell Tumors	Testis	Primary	18.6911	3.20488	0.34473	22	NOL7	LTR/ERVL-MaLR|MLT1L|6|13995200|13995432	chr6	13615391	14066689	+	+	ENSG00000225921.6	protein_coding	protein_coding
trans5da77f603f16d0af	Uveal Melanoma	Eye	Primary	9.36134	0.678882	NA	8	RP11-726G1.1	LTR/ERV1|HERVE-int|12|9567036|9567633;LTR/ERV1|HERVE-int|12|9568604|9569205	chr12	9567588	9575663	+	+	ENSG00000214776.9	transcribed_unprocessed_pseudogene	transcribed_unprocessed_pseudogene
trans1bcefc0c654dd216	Thyroid Carcinoma	Thyroid	Primary	26.3493	5.50586	2.69813	2	NA	LTR/ERVL|LTR16|11|122033072|122033467	chr11	122028327	122033463	*	*	NA	NA	NA
trans03c554bc64386317	Kidney Renal Clear Cell Carcinoma	Kidney	Primary	20.7061	3.80102	6.42026	5	C1orf186	LTR/ERV1|Harlequin-int~LTR2B|1|206054886|206058912	chr1	206035113	206061911	*	*	ENSG00000263961.6	protein_coding	protein_coding
trans1ff6626f6dfc8c56	Esophageal Carcinoma	Esophagus	Primary	17.1373	2.76656	3.03239	2	UBE2J1	LTR/ERV1|LTR24B|6|89323228|89323734;LTR/ERV1|LTR8|6|89324380|89324576	chr6	89318787	89326648	*	*	ENSG00000198833.6	protein_coding	protein_coding
transcd21e67f05d86f28	Testicular Germ Cell Tumors	Testis	Primary	21.2297	3.9643	1.34511	7	KIAA1551	LTR/ERV1|LTR24B|12|31958469|31958911	chr12	31958494	32000388	+	+	ENSG00000174718.11	protein_coding	protein_coding
trans95eebb8f448b35b0	Pancreatic Adenocarcinoma	Pancreas	Primary	16.8338	2.68895	0.141811	5	CEACAM5	LTR/ERV1|MER65-int|19|41770580|41771854;LTR/ERV1|LTR54B|19|41771856|41772234	chr19	41719971	41772208	+	+	ENSG00000105388.15	protein_coding	protein_coding
trans30cd21e6da456cd1	Ovarian Serous Cystadenocarcinoma	Ovary	Primary	7.71565	0.289484	2.24316	2	MAK	LTR/ERVL-MaLR|MLT1F|6|10829021|10829245	chr6	10770071	10829205	*	*	ENSG00000111837.11	protein_coding	protein_coding
trans4324d8ab2a1c5c73	Head and Neck Squamous Cell Carcinoma	Head and Neck	Primary	1.55959	0.0292919	0	5	RP11-352D3.2	LTR/ERVL-MaLR|MLT1J2|20|4142077|4142457;LTR/ERVL|MER21A|20|4143423|4144243	chr20	4032268	4144186	*	*	ENSG00000205300.3	lincRNA	lincRNA
transaa6eff19720bc1aa	Pancreatic Adenocarcinoma	Pancreas	Primary	7.5942	0.261773	0.418237	2	RP1-122P22.2	LTR/ERV1|HERVH-int~LTR7B|20|19752049|19756776	chr20	19756523	19759714	*	*	ENSG00000233895.1	lincRNA	lincRNA
trans434eef7c82d27d20	Esophageal Carcinoma	Esophagus	Primary	2.83881	0.0578769	0.594657	1	LINC00511	LTR/ERVL-MaLR|MLT1F2|17|72549069|72549643	chr17	72549266	72550690	*	*	ENSG00000227036.6	lincRNA	lincRNA
transda6f0828e8c15514	Testicular Germ Cell Tumors	Testis	Primary	9.84101	0.818809	1.27462	4	RP11-169F17.1	LTR/ERVL-MaLR|MSTD|18|73255735|73256099;LTR/ERV1|MER110|18|73264094|73264308	chr18	73250074	73264503	*	*	ENSG00000263711.5	processed_transcript	lincRNA
transcc5795ace9baa947	Testicular Germ Cell Tumors	Testis	Primary	7.97179	0.358981	1.28456	2	NA	LTR/ERVL-MaLR|MLT1G1|2|65627901|65628461	chr2	65609845	65628429	*	*	NA	NA	NA
trans053f943224a2c44c	Skin Cutaneous Melanoma	Skin	Primary	14.6263	2.09711	0.891093	5	MIA-RAB4B	LTR/ERVL-MaLR|MLT1F2|19|40771712|40771932	chr19	40771913	40777110	+	+	ENSG00000268975.1	protein_coding	nonsense_mediated_decay
trans43568427317afec5	Bladder Urothelial Carcinoma	Bladder	Primary	4.52119	0.0832454	0.0218297	5	NA	LTR/ERVL|LTR16D2|16|52297410|52297700;LTR/ERVL-MaLR|MLT1A|16|52356191|52356640	chr16	52296538	52383789	*	*	NA	NA	NA
trans7244bc60038d13ed	Stomach Adenocarcinoma	Stomach	Primary	30.4174	6.86386	4.00362	3	PLAUR	LTR/ERV1|LTR19A|19|43648362|43648413	chr19	43648310	43655460	*	*	ENSG00000011422.11	protein_coding	protein_coding
trans7c754fce20e2e226	Ovarian Serous Cystadenocarcinoma	Ovary	Primary	15.2346	2.27093	0.5557	89	ADRM1	LTR/ERV1|LTR35B|20|62366951|62367029	chr20	62302904	62367163	*	*	ENSG00000130706.12	protein_coding	protein_coding
trans9b8b83407187c8b7	Glioblastoma Multiforme	Brain	Primary	8.41401	0.470411	0.998109	14	ADGRG1	LTR/ERV1|LTR78B|16|57665497|57666359	chr16	57639086	57665571	+	+	ENSG00000205336.11	protein_coding	protein_coding
trans60e7e73f1b472a75	Cholangiocarcinoma	Bile Duct	Primary	45.748	11.9495	0.47851	8	AC004231.2	LTR/ERVL-MaLR|THE1B|17|40922002|40922211	chr17	40921969	40937571	-	-	ENSG00000234477.1	antisense	antisense
trans7096b7eb5e58b7ff	Stomach Adenocarcinoma	Stomach	Primary	8.55563	0.506367	0.918854	2	RP11-29H23.5	LTR/ERVK|LTR5_Hs|1|155626666|155627633;LTR/ERVK|LTR5_Hs|1|155634878|155635845	chr1	155626981	155635215	*	*	ENSG00000246203.2	unprocessed_pseudogene	unprocessed_pseudogene
trans437d0b4eacf0b77e	Esophageal Carcinoma	Esophagus	Primary	1.48862	0	0.00853743	1	NA	LTR/ERVL|MER54A|8|114713323|114713586	chr8	114712234	114714791	*	*	NA	NA	NA
trans4f3de54f47b5884b	Lymphoid Neoplasm Diffuse Large B-cell Lymphoma	Lymph Nodes	Primary	21.5528	4.1181	3.3463	3	FCRLA	LTR/ERVL-MaLR|MLT1A0|1|161714023|161714392	chr1	161706968	161714346	+	+	ENSG00000132185.16	protein_coding	protein_coding
trans555f7f184ea78367	Testicular Germ Cell Tumors	Testis	Primary	7.54276	0.267153	0.0349741	3	ESRG	LTR/ERV1|MER110A|3|54632465|54632901;LTR/ERV1|MER61A|3|54633394|54633720;LTR/ERV1|HERVH-int~LTR7|3|54634484|54640204	chr3	54632143	54638033	-	-	ENSG00000265992.1	sense_intronic	sense_intronic
trans43af12d8f9f2d719	Prostate Adenocarcinoma	Prostate	Primary	3.41429	0.139858	0.141465	7	ADAM2	LTR/ERV1|HERVI-int~LTR10G|8|39848199|39853109	chr8	39817927	39852717	-	-	ENSG00000104755.14	protein_coding	protein_coding
trans43c907a820da6c00	Lung Squamous Cell Carcinoma	Lung	Primary	2.79779	0	0.101162	2	NA	LTR/ERVL-MaLR|MLT1A0|4|22095873|22096227	chr4	22095937	22268564	*	*	NA	NA	NA
trans1e7f7b79bc5c1974	Lung Squamous Cell Carcinoma	Lung	Primary	115.486	37.8122	3.77423	11	CTD-2523D13.2	LTR/ERVL-MaLR|MLT1D|11|119746633|119746784	chr11	119661000	119746714	*	*	ENSG00000254854.1	antisense	antisense
trans3fa4db44387cb768	Ovarian Serous Cystadenocarcinoma	Ovary	Primary	18.1049	3.12612	0.0371648	16	MSLN	LTR/ERVL|MER54B|16|760973|761306	chr16	760799	768861	+	+	ENSG00000102854.14	protein_coding	protein_coding
trans64b2e022967b14f8	Uveal Melanoma	Eye	Primary	27.2047	5.92942	NA	2	EXOSC4	LTR/ERVL-MaLR|MLT1G3|8|144077547|144078054	chr8	144078000	144081136	*	*	ENSG00000178896.6	protein_coding	protein_coding
transa589d14066cbd339	Testicular Germ Cell Tumors	Testis	Primary	9.61195	0.795373	0.729841	2	AC074289.1	LTR/ERV1|HERVH-int~LTR7|2|64252414|64257646	chr2	64252367	64257607	*	*	ENSG00000225889.7	antisense	antisense
trans43e0ce030ee32db6	Testicular Germ Cell Tumors	Testis	Primary	78.9155	0.988555	2.60307	4	LINC01356	LTR/ERV1|HERVH-int~LTR7|1|112820139|112823232;LTR/ERV1|HERVH-int~LTR7|1|112823539|112826054	chr1	112820139	112840558	-	-	ENSG00000215866.7	lincRNA	lincRNA
trans14ece0e77c4865ae	Kidney Renal Clear Cell Carcinoma	Kidney	Primary	8.01486	0.399496	0.386647	4	LINC01235	LTR/ERVL-MaLR|MLT1I|9|13408164|13408519	chr9	13406100	13433095	-	-	ENSG00000270547.5	lincRNA	lincRNA
trans227cf767e7c39f7d	Lymphoid Neoplasm Diffuse Large B-cell Lymphoma	Lymph Nodes	Primary	8.9837	0.64421	0.252151	2	NA	LTR/ERVL-MaLR|MLT1K|16|21391499|21391604	chr16	21386893	21391713	*	*	NA	NA	NA
trans6c106db863bf5f85	Lymphoid Neoplasm Diffuse Large B-cell Lymphoma	Lymph Nodes	Primary	8.9837	0.64421	0.252151	2	RP11-231C14.7	LTR/ERVL-MaLR|MLT1K|16|29370630|29370735	chr16	29366028	29370844	*	*	ENSG00000198106.8	lincRNA	lincRNA
trans9bf6da7d0e1ebc82	Glioblastoma Multiforme	Brain	Primary	8.69929	0.912856	0.267834	3	NETO2	LTR/ERV1|MER52C|16|47054693|47055871;LTR/ERVL-MaLR|MLT1A0|16|47063078|47063310;LTR/ERVL|LTR16A|16|47063386|47063679	chr16	47055855	47081660	*	*	ENSG00000171208.9	protein_coding	protein_coding
transd3a5367fa7a3adfc	Skin Cutaneous Melanoma	Skin	Primary	18.5898	3.31529	1.14434	3	RP11-386M24.9	LTR/ERVL-MaLR|MSTC|15|92678052|92678466	chr15	92617451	92678325	-	-	ENSG00000271763.1	antisense	antisense
trans33d47d14f5e45657	Cholangiocarcinoma	Bile Duct	Primary	66.7805	19.6762	11.0509	7	SMYD2	LTR/ERVL|MER21-int~MER21C|1|214343731|214345816	chr1	214327622	214344291	+	+	ENSG00000143499.13	protein_coding	protein_coding
trans453755af6248f1ce	Testicular Germ Cell Tumors	Testis	Primary	5.65001	0	0.0882431	2	NA	LTR/ERV1|HERVH-int~LTR7|13|42868004|42872703;LTR/ERV1|LTR7|13|42872706|42873158	chr13	42870580	42872848	*	*	NA	NA	NA
trans17ea905b6ee5ad9f	Pancreatic Adenocarcinoma	Pancreas	Primary	9.32551	0.7368	0.406979	2	MYEOV	LTR/ERVL-MaLR|MLT1L|11|69341342|69341729	chr11	69294493	69341682	*	*	ENSG00000172927.7	protein_coding	protein_coding
trans55e4c124890f7a44	Brain Lower Grade Glioma	Brain	Primary	10.2254	0.986147	0.53486	2	MCM8	LTR/ERVL-MaLR|MLT1C2|20|6070817|6070988	chr20	5937055	6072633	*	*	ENSG00000125885.13	protein_coding	protein_coding
transfca7a3bfc3b85718	Kidney Renal Clear Cell Carcinoma	Kidney	Primary	8.41268	0.507976	0.0875993	2	LINC00462	LTR/ERVL-MaLR|THE1D|13|48590404|48590785	chr13	48576924	48590606	*	*	ENSG00000233610.1	lincRNA	lincRNA
trans94f0ffcb141ed50f	Breast Invasive Carcinoma	Breast	Primary	9.40015	0.758252	1.35726	2	NA	LTR/ERVL|LTR33A|2|131568415|131568806	chr2	131564858	131568781	*	*	NA	NA	NA
trans9f08bbf977fac0b5	Brain Lower Grade Glioma	Brain	Primary	10.2191	0.971746	3.31637	3	LINC01094	LTR/ERVL-MaLR|MLT1J|4|78680662|78681055;LTR/Gypsy|MamGypLTR1a|4|78681102|78681338	chr4	78645768	78685133	+	+	ENSG00000251442.5	lincRNA	lincRNA
trans51d4612fb7c53b3c	Cholangiocarcinoma	Bile Duct	Primary	8.42679	0.780789	2.52818	7	CLDN16	LTR/ERVL|MLT2A1|3|190370640|190371280	chr3	190322529	190412146	+	+	ENSG00000113946.3	protein_coding	protein_coding
trans36bf96e085a67459	Ovarian Serous Cystadenocarcinoma	Ovary	Primary	6.26549	0	0	2	DNAJB13	LTR/ERVK|HERVK14-int~LTR14B|11|73943577|73947475	chr11	73946846	73952916	*	*	ENSG00000187726.8	protein_coding	protein_coding
trans71e9481e775e362a	Kidney Renal Clear Cell Carcinoma	Kidney	Primary	8.79583	0.614169	1.87963	2	UGT2B7	LTR/ERV1|Harlequin-int~LTR2B|4|69053326|69057338;LTR/ERVL-MaLR|MLT1G3|4|69119346|69119887;LTR/ERVL|MER73|4|69120867|69121488	chr4	69052572	69120877	*	*	ENSG00000171234.13	protein_coding	protein_coding
transa2443c603ffe51f2	Esophageal Carcinoma	Esophagus	Primary	6.32202	0.0394638	0.0202881	2	NA	LTR/ERV1|HERVH-int~LTR7Y|5|136540943|136541750;LTR/ERV1|HERVH-int|5|136541922|136544962;LTR/ERV1|HERVH-int~LTR7|5|136566160|136571245	chr5	136541361	136568553	*	*	NA	NA	NA
trans45a2edcc5923cac3	Pheochromocytoma and Paraganglioma	Adrenal Gland	Primary	3.16488	0.0303186	0.121919	3	CFAP61	LTR/ERVL-MaLR|MLT1G3|20|20277584|20278091	chr20	20270834	20277653	*	*	ENSG00000089101.17	protein_coding	protein_coding
transbcfd79ec484d60ab	Testicular Germ Cell Tumors	Testis	Primary	8.40437	0.519007	0.940778	2	CLEC12A	LTR/ERV1|LOR1-int|12|9954513|9955079	chr12	9945205	9954792	*	*	ENSG00000172322.13	protein_coding	protein_coding
trans3a7ce2218e706937	Testicular Germ Cell Tumors	Testis	Primary	12.3985	1.57394	0.0277712	2	NA	LTR/ERV1|HERVH-int~LTR7Y|6|6027808|6033600	chr6	6028017	6030651	*	*	NA	NA	NA
trans45c04c6a27caf183	Head and Neck Squamous Cell Carcinoma	Head and Neck	Primary	1.78233	0.00670893	0.481506	3	RELL1	LTR/ERVL|MER21C|4|37671881|37672447	chr4	37668721	37675470	*	*	ENSG00000181826.9	protein_coding	protein_coding
trans221a19cc12e4271d	Esophageal Carcinoma	Esophagus	Primary	6.49219	0.0569375	0.0423495	2	NA	LTR/ERV1|HERVH-int|5|136541922|136544962;LTR/ERV1|HERVFH21-int|5|136547140|136550727	chr5	136542509	136549537	*	*	NA	NA	NA
trans464483e469ee144f	Lymphoid Neoplasm Diffuse Large B-cell Lymphoma	Lymph Nodes	Primary	3.91668	0.0462139	0.0364334	4	HLA-DPA3	LTR/ERV1|MER57-int~MER57B1|6|33132220|33134899;LTR/ERV1|MER57-int~MER57B1|6|33139166|33140149	chr6	33130779	33143298	*	*	ENSG00000237398.1	unprocessed_pseudogene	unprocessed_pseudogene
trans465a1e4d5606822b	Uveal Melanoma	Eye	Primary	1.38908	0.342158	NA	2	BACE1	LTR/ERV1|LTR49|11|117297153|117297337	chr11	117296922	117299797	*	*	ENSG00000186318.16	protein_coding	protein_coding
trans84aa51ecc2ac8322	Uterine Carcinosarcoma	Uterus	Primary	15.5713	2.54102	3.68761	3	GPX7	LTR/ERVL|LTR16A|1|52601457|52601866	chr1	52601584	52609201	+	+	ENSG00000116157.5	protein_coding	protein_coding
trans480dc93fafe4edc1	Esophageal Carcinoma	Esophagus	Primary	1.15662	0	0	5	RPE65	LTR/ERV1|LTR17|1|68392098|68392789	chr1	68392015	68465265	*	*	ENSG00000116745.6	protein_coding	protein_coding
transe113bd146591ce1d	Uveal Melanoma	Eye	Primary	16.6681	3.66904	NA	5	FLYWCH1	LTR/ERVL-MaLR|MLT1F|16|2940098|2940385	chr16	2933209	2940132	+	+	ENSG00000059122.16	protein_coding	protein_coding
trans72058e33ad416969	Esophageal Carcinoma	Esophagus	Primary	9.11586	0.714105	2.4015	10	IL13RA1	LTR/ERV1|LOR1a|X|118804807|118805304	chrX	118741016	118804988	+	+	ENSG00000131724.10	protein_coding	protein_coding
trans3413d14c0d0b907e	Bladder Urothelial Carcinoma	Bladder	Primary	40.1786	10.4263	8.78585	16	OAS3	LTR/ERVL-MaLR|MLT1N2|12|112971074|112971446;LTR/ERVL|ERV3-16A3_I-int|12|112972626|112972877	chr12	112906663	112973247	+	+	ENSG00000111331.12	protein_coding	protein_coding
trans1f42917775dc4b40	Glioblastoma Multiforme	Brain	Primary	51.7709	14.5113	0	4	ACOT13	LTR/ERVL-MaLR|MLT1A0|6|24702411|24702561	chr6	24667931	24705097	*	*	ENSG00000112304.10	protein_coding	protein_coding
transbd37b86ea3206a93	Testicular Germ Cell Tumors	Testis	Primary	6.20062	0	0.231312	3	NA	LTR/ERV1|MER61-int~MER61B|7|22801905|22804089;LTR/ERV1|MER61-int~MER61B|7|22805097|22808600	chr7	22800942	22806025	*	*	NA	NA	NA
trans9e3ed2599e6162ea	Lymphoid Neoplasm Diffuse Large B-cell Lymphoma	Lymph Nodes	Primary	34.9604	8.69169	6.42148	2	PCED1B-AS1	LTR/ERV1|LTR8|12|47205794|47206481	chr12	47205899	47209425	-	-	ENSG00000247774.6	processed_transcript	lincRNA
transc772e1783a7f5d0e	Thymoma	Thymus	Primary	8.70653	0.622503	0.766759	2	NA	LTR/ERVL-MaLR|MLT1J2|7|68011868|68012302;LTR/ERVL-MaLR|MLT1G1|7|68017732|68018219	chr7	68010418	68017978	*	*	NA	NA	NA
transc3ce871197946c4f	Uveal Melanoma	Eye	Primary	13.6994	1.98779	NA	2	NA	LTR/ERVL-MaLR|MSTA|KI270743.1|135097|135386;LTR/ERVL-MaLR|MSTA|KI270743.1|136879|137225	chrUn_KI270743v1	135044	137799	*	*	NA	NA	NA
trans480dc93fafe4edc1	Head and Neck Squamous Cell Carcinoma	Head and Neck	Primary	1.17976	0	0.0725602	5	RPE65	LTR/ERV1|LTR17|1|68392098|68392789	chr1	68392015	68465265	*	*	ENSG00000116745.6	protein_coding	protein_coding
transc5c696fcdd59172d	Testicular Germ Cell Tumors	Testis	Primary	11.6366	1.40944	2.96919	2	NA	LTR/ERVK|HERVK9-int~MER9a2|13|19626322|19631229	chr13	19626384	19631003	*	*	NA	NA	NA
trans9a3baa7d2b21698d	Testicular Germ Cell Tumors	Testis	Primary	6.15623	0	0.765711	2	NA	LTR/ERV1|HERVH-int~LTR7|3|167422393|167423365;LTR/ERV1|HERVH-int~LTR7|3|167431286|167437130	chr3	167422895	167431943	*	*	NA	NA	NA
trans4829a1eb555e557e	Esophageal Carcinoma	Esophagus	Primary	2.40682	0.0571743	0.463898	1	MIR31HG	LTR/ERVL-MaLR|THE1B|9|21543863|21544205	chr9	21541898	21545934	*	*	ENSG00000171889.3	sense_overlapping	sense_overlapping
trans28c6a0992157f9bb	Pheochromocytoma and Paraganglioma	Adrenal Gland	Primary	11.0342	1.25371	0.34648	21	ARHGEF17	LTR/ERVL-MaLR|MLT1M|11|73370206|73370628	chr11	73343094	73370870	+	+	ENSG00000110237.3	protein_coding	protein_coding
transc6f055d6811fb5c6	Lymphoid Neoplasm Diffuse Large B-cell Lymphoma	Lymph Nodes	Primary	7.25326	0.300824	0.291218	2	RP11-231C14.7	LTR/ERVL-MaLR|MLT1O|16|29371304|29371496;LTR/ERVL-MaLR|MLT1J1|16|29371502|29371847	chr16	29371237	29381102	*	*	ENSG00000198106.8	lincRNA	lincRNA
trans3b2ab8b8b9899f05	Brain Lower Grade Glioma	Brain	Primary	34.7516	8.70304	7.62392	5	LINC01088	LTR/ERVL|LTR79|4|79085924|79086311;LTR/ERVL-MaLR|THE1C|4|79195639|79196015	chr4	78971530	79308735	+	+	ENSG00000249307.5	antisense	antisense
trans6dedb85e52260a20	Testicular Germ Cell Tumors	Testis	Primary	6.12262	0	0.0791802	2	LSAMP	LTR/ERV1|HERVH-int~LTR7Y|3|116105357|116111228	chr3	116110036	116110837	*	*	ENSG00000185565.11	protein_coding	protein_coding
trans331534ad189a541d	Thymoma	Thymus	Primary	33.469	8.29522	0.720719	3	PARP1	LTR/ERVL-MaLR|MLT1O|1|226363461|226363822	chr1	226360692	226363532	-	-	ENSG00000143799.12	protein_coding	protein_coding
transfcd7d54236fbd69a	Uterine Corpus Endometrial Carcinoma	Uterus	Primary	30.4428	7.2785	5.85541	4	IFI44	LTR/ERVL-MaLR|MLT1K|1|78664336|78664536	chr1	78655489	78664566	+	+	ENSG00000137965.10	protein_coding	protein_coding
trans4838bc08601d98bd	Cholangiocarcinoma	Bile Duct	Primary	1.31306	0	0	2	NA	LTR/ERV1|MER57-int|GL000214.1|35169|35279	chrUn_GL000214v1	35278	35862	*	*	NA	NA	NA
trans853a1367a15feabe	Esophageal Carcinoma	Esophagus	Primary	7.54574	0.350029	0.260254	2	RP11-54H7.4	LTR/ERV1|LTR7Y|13|109264649|109265089;LTR/ERV1|LTR7Y|13|109265090|109265520;LTR/ERV1|HERVH-int~LTR7Y|13|109265521|109271116	chr13	109265052	109271076	*	*	ENSG00000275216.1	lincRNA	lincRNA
trans9b8773579ac26887	Sarcoma	Soft Tissue	Primary	13.1064	3.16262	NA	2	CH17-13I23.3	LTR/ERVL-MaLR|MLT1J2|1|143401462|143401793	chr1	143401165	143420142	*	*	ENSG00000277702.1	unprocessed_pseudogene	unprocessed_pseudogene
trans6b58e0236097e3f3	Breast Invasive Carcinoma	Breast	Primary	6.4679	0.106275	0.402328	3	RP11-53O19.2	LTR/Gypsy|MamGypLTR1c|5|44752485|44752754;LTR/ERVL-MaLR|THE1B|5|44752755|44753114;LTR/ERVL-MaLR|MLT1H2-int|5|44761094|44762179;LTR/ERVL-MaLR|MLT1H2|5|44765211|44765605;LTR/Gypsy|MamGypLTR2c|5|44765947|44766361	chr5	44752426	44766586	+	+	ENSG00000248779.1	lincRNA	lincRNA
trans58eafc666e5057c9	Kidney Renal Papillary Cell Carcinoma	Kidney	Primary	13.2958	1.9219	1.74265	3	LRRN4	LTR/ERV1|LTR78|20|6050383|6050705	chr20	6049780	6054572	-	-	ENSG00000125872.7	protein_coding	protein_coding
transbaa8d81b0d6e4c54	Lymphoid Neoplasm Diffuse Large B-cell Lymphoma	Lymph Nodes	Primary	35.1805	8.94328	11.1681	2	C1orf186	LTR/ERV1|LTR2B|1|206052519|206053000;LTR/ERV1|Harlequin-int~LTR2B|1|206054886|206058912	chr1	206052624	206058864	*	*	ENSG00000263961.6	protein_coding	protein_coding
trans071e9fdfeb90c321	Uveal Melanoma	Eye	Primary	24.2009	5.28061	NA	3	AP5B1	LTR/ERVL-MaLR|MSTD|11|65777364|65777699	chr11	65773652	65780938	*	*	ENSG00000254470.2	protein_coding	protein_coding
trans0e68bd6e6d584e57	Testicular Germ Cell Tumors	Testis	Primary	6.0582	0	0.0139893	18	ABHD12B	LTR/ERV1|HERVH-int~LTR7|14|50893162|50896881;LTR/ERVL-MaLR|MLT1A0|14|50904682|50905016	chr14	50895584	50920619	*	*	ENSG00000131969.14	protein_coding	protein_coding
transdaee8e353903b077	Skin Cutaneous Melanoma	Skin	Primary	9.93669	0.992166	0	2	HPN-AS1	LTR/ERVL-MaLR|MLT1K|19|35066679|35067121	chr19	35066715	35087100	-	-	ENSG00000227392.1	antisense	antisense
trans483b37291fbe1086	Testicular Germ Cell Tumors	Testis	Primary	17.614	0	0.0302383	1	RP11-267L5.1	LTR/ERV1|HERVH-int~LTR7|8|114282976|114287733	chr8	114284373	114287380	*	*	ENSG00000254339.5	lincRNA	lincRNA
transf2f309e772308e9a	Lymphoid Neoplasm Diffuse Large B-cell Lymphoma	Lymph Nodes	Primary	21.9047	4.57669	4.00623	5	PCED1B	LTR/ERV1|LTR8|12|47205794|47206481	chr12	47205899	47216507	-	-	ENSG00000179715.12	protein_coding	protein_coding
trans893bd4098c3c42fe	Uterine Corpus Endometrial Carcinoma	Uterus	Primary	27.8726	6.53116	3.26613	5	OAS2	LTR/ERVL|MER21C|12|113011190|113011980	chr12	113005025	113011722	+	+	ENSG00000111335.12	protein_coding	protein_coding
transe4848249f8504db1	Breast Invasive Carcinoma	Breast	Primary	6.94162	0.428502	0.52106	3	NAT1	LTR/ERVL|LTR16A2|8|18212490|18212792	chr8	18212390	18223688	+	+	ENSG00000171428.13	protein_coding	protein_coding
transa274882a4a7bc0a4	Rectum Adenocarcinoma	Colorectal	Primary	15.8508	2.71038	2.74364	7	RP11-498C9.13	LTR/ERVL|MLT2B4|17|81932260|81932471	chr17	81932393	81937544	-	-	ENSG00000263585.1	antisense	antisense
trans48ccc7d9177e319b	Lung Squamous Cell Carcinoma	Lung	Primary	2.15575	0.0996658	0.0554942	1	KCNMB2-AS1	LTR/ERVL-MaLR|THE1B~THE1B-int|3|178745145|178747418;LTR/ERVL-MaLR|MLT1M|3|178747736|178747980	chr3	178747162	178748427	*	*	ENSG00000237978.5	antisense	antisense
trans380c4c464599fea7	Cholangiocarcinoma	Bile Duct	Primary	30.1772	7.34122	0.450335	2	SLFN13	LTR/ERVL-MaLR|MLT1A|17|35438948|35439336	chr17	35438984	35442569	*	*	ENSG00000154760.13	protein_coding	protein_coding
trans01ad1996482d7569	Testicular Germ Cell Tumors	Testis	Primary	6.00316	0	0.294534	3	AC007326.1	LTR/ERVK|HERVK-int~LTR5_Hs|22|18939648|18947848;LTR/ERV1|LTR1A2|22|18952794|18953590	chr22	18946351	18953264	*	*	ENSG00000279560.1	protein_coding	protein_coding
trans490baa39a2e5c47c	Testicular Germ Cell Tumors	Testis	Primary	10.0365	0	0	3	SCGB3A2	LTR/ERV1|HERVH-int~LTR7|5|147869836|147874075	chr5	147871303	147881467	*	*	ENSG00000164265.8	protein_coding	protein_coding
trans037aed148866f2df	Uveal Melanoma	Eye	Primary	17.5483	3.43245	NA	3	NT5DC3	LTR/ERVL|LTR16A|12|103772532|103772950	chr12	103772311	103774797	*	*	ENSG00000111696.11	protein_coding	protein_coding
trans28e5fb00e11f5d8e	Prostate Adenocarcinoma	Prostate	Primary	3.46946	0.596892	0.739165	2	ERVH48-1	LTR/ERV1|HERVH48-int~MER48|21|42916742|42922458;LTR/ERV1|HERVH48-int~MER48|21|42925245|42925844	chr21	42916815	42925599	*	-	ENSG00000233056.2	lincRNA	lincRNA
trans0e7ff514862bd30f	Kidney Renal Papillary Cell Carcinoma	Kidney	Primary	28.2563	6.73878	8.5143	10	CTSC	LTR/ERVL-MaLR|MLT1A0|11|88423486|88423831;LTR/ERVL-MaLR|MLT1A|11|88424307|88424684	chr11	88293593	88424616	-	-	ENSG00000109861.15	protein_coding	protein_coding
trans58034e15401abd1b	Pheochromocytoma and Paraganglioma	Adrenal Gland	Primary	24.0985	5.36177	6.6551	16	NCOA7	LTR/ERVL-MaLR|THE1D|6|125931724|125932082	chr6	125790692	125932028	+	+	ENSG00000111912.19	protein_coding	protein_coding
transa4eaf652ae84d242	Skin Cutaneous Melanoma	Skin	Metastasis	12.9433	1.88359	2.01095	2	BMS1P17	LTR/ERV1|PABL_A|14|19306875|19307073	chr14	19307037	19331618	*	*	ENSG00000228294.6	transcribed_unprocessed_pseudogene	processed_transcript
trans988b1b0b5bdd6ca2	Mesothelioma	Pleura	Primary	5.28733	0	NA	10	FKBP9	LTR/ERVL-MaLR|MSTB|7|32966605|32966974	chr7	32966951	33006090	+	+	ENSG00000122642.10	protein_coding	protein_coding
trans3094f099273edd7a	Testicular Germ Cell Tumors	Testis	Primary	5.95595	0	0	2	NA	LTR/ERVL|LTR83|13|54341467|54342011	chr13	54335120	54342163	*	*	NA	NA	NA
transcfca7cbd75b390f6	Adrenocortical Carcinoma	Adrenal Gland	Primary	11.1679	2.52031	2.66147	6	HYMAI	LTR/Gypsy|MamGyp-int~MamGypLTR1a|6|143963847|143965407	chr6	143939920	144008149	-	-	ENSG00000276680.1	misc_RNA	misc_RNA
trans28e5fb00e11f5d8e	Testicular Germ Cell Tumors	Testis	Primary	204.663	0.596892	0.739515	2	ERVH48-1	LTR/ERV1|HERVH48-int~MER48|21|42916742|42922458;LTR/ERV1|HERVH48-int~MER48|21|42925245|42925844	chr21	42916815	42925599	*	-	ENSG00000233056.2	lincRNA	lincRNA
trans4adce4628d50aad5	Testicular Germ Cell Tumors	Testis	Primary	32.974	0	0	2	AC008753.1	LTR/ERV1|LTR7|19|53831404|53831854;LTR/ERV1|HERVH-int~LTR7|19|53832340|53837348	chr19	53831521	53837257	*	*	ENSG00000274524.1	miRNA	miRNA
trans5d4f91ccbc4824cd	Testicular Germ Cell Tumors	Testis	Primary	7.15529	0.311667	0.649048	3	NA	LTR/ERVK|HERVK-int~LTR5B|20|34133703|34136578	chr20	34132245	34136450	*	*	NA	NA	NA
transb9d94534ea2aad2b	Brain Lower Grade Glioma	Brain	Primary	12.8458	1.89332	4.18034	4	BAALC	LTR/ERVL-MaLR|MLT1A0|8|103200581|103200934	chr8	103140610	103230298	+	+	ENSG00000164929.16	protein_coding	protein_coding
trans008b0ca42e16bae1	Testicular Germ Cell Tumors	Testis	Primary	15.9987	2.84597	0.239453	6	ARSE	LTR/ERVL-MaLR|MLT1A0|X|2952468|2952620	chrX	2952423	2964480	-	-	ENSG00000157399.14	protein_coding	protein_coding
trans13efe992ca0bf6db	Ovarian Serous Cystadenocarcinoma	Ovary	Primary	8.19532	0.588076	0.970969	2	LINC00665	LTR/ERV1|LTR6B|19|36324873|36325429;LTR/ERV1|HERVS71-int~LTR6B|19|36327346|36331043	chr19	36324731	36331066	*	*	ENSG00000232677.6	lincRNA	lincRNA
trans597d2e03d92e082b	Brain Lower Grade Glioma	Brain	Primary	5.89239	4.46888e-06	0.287416	4	RPL23AP82	LTR/ERV1|MER31-int|22|50799214|50799654	chr22	50782284	50799651	*	*	ENSG00000184319.15	transcribed_unprocessed_pseudogene	processed_transcript
trans8654181ca3412e86	Testicular Germ Cell Tumors	Testis	Primary	6.24028	0.0856222	0.260507	2	CAB39L	LTR/ERV1|LTR9B|13|49377251|49377388	chr13	49377376	49378181	*	*	ENSG00000102547.18	protein_coding	protein_coding
trans76b5675cad568bd8	Glioblastoma Multiforme	Brain	Primary	30.0829	7.47698	5.88424	10	SGCE	LTR/ERVL|ERVL-E-int|7|94583406|94585034	chr7	94584850	94656253	-	-	ENSG00000127990.15	protein_coding	protein_coding
trans4b90fdec2257ed5f	Head and Neck Squamous Cell Carcinoma	Head and Neck	Primary	15.7849	0.778254	0.39442	1	NA	LTR/ERV1|MER57A1|18|49552923|49553256;LTR/ERVK|MER11C|18|49553263|49554344	chr18	49552951	49554287	*	*	NA	NA	NA
trans79135e7cc600548e	Breast Invasive Carcinoma	Breast	Primary	6.89802	0.253202	0.622737	2	RP11-53O19.1	LTR/ERVL-MaLR|MLT1A|5|44745140|44745439	chr5	44742405	44746039	*	*	ENSG00000251141.5	antisense	antisense
transd3843097be525b7c	Testicular Germ Cell Tumors	Testis	Primary	11.0675	0.0290402	0.0513263	3	FOXP2	LTR/ERVL-MaLR|MLT1G1|7|114368854|114369314;LTR/ERV1|LTR17|7|114385777|114386317	chr7	114368898	114386204	*	-	ENSG00000128573.23	protein_coding	protein_coding
trans4bb9fd377e12cfda	Kidney Renal Clear Cell Carcinoma	Kidney	Primary	2.93461	0	0	2	NA	LTR/ERVL-MaLR|MLT1A|5|123859653|123860004	chr5	123859693	123865855	*	*	NA	NA	NA
transa52aeb76321aef2a	Bladder Urothelial Carcinoma	Bladder	Primary	0.458275	0	0	5	GABRQ	LTR/ERVL-MaLR|MLT1F2|X|152574626|152575149	chrX	152574699	152698770	*	+	ENSG00000268089.2	protein_coding	protein_coding
trans67bc25fe69626d66	Lymphoid Neoplasm Diffuse Large B-cell Lymphoma	Lymph Nodes	Primary	6.9719	0.278176	2.26873	3	NA	LTR/ERVL-MaLR|THE1A~THE1A-int|11|35047926|35050201;LTR/ERVL-MaLR|MLT1H|11|35088274|35088694	chr11	35050008	35097878	*	*	NA	NA	NA
transdd1504d1eeab6487	Pheochromocytoma and Paraganglioma	Adrenal Gland	Primary	7.38058	0.386782	1.87546	2	TRPV4	LTR/ERVL-MaLR|MLT1H|12|109777723|109777875	chr12	109777592	109799957	*	*	ENSG00000111199.10	protein_coding	protein_coding
trans386fd8689d707d69	Testicular Germ Cell Tumors	Testis	Primary	6.35356	0.125273	0.0986747	3	NA	LTR/ERV1|MER39B|13|54225179|54225608;LTR/ERVL-MaLR|MLT1I|13|54353162|54353337	chr13	54225276	54353893	*	*	NA	NA	NA
trans1c6ca1b27d149ad7	Prostate Adenocarcinoma	Prostate	Primary	8.43878	0.663426	2.14294	7	GLYATL1	LTR/ERVK|HERVK22-int~LTR22|11|58927116|58929132;LTR/ERV1|MER57-int~MER57A1|11|58943110|58944232;LTR/ERV1|LTR34|11|59049298|59049533;LTR/ERVL|LTR80B|11|59051338|59051694	chr11	58927620	59051998	+	+	ENSG00000166840.13	protein_coding	protein_coding
trans9caf45508d165ddf	Brain Lower Grade Glioma	Brain	Primary	9.13262	0.865514	2.7361	2	NA	LTR/ERVL-MaLR|MLT1J|4|78680662|78681055;LTR/Gypsy|MamGypLTR1a|4|78681102|78681338	chr4	78649606	78681368	*	*	NA	NA	NA
trans51d71bef55092f83	Head and Neck Squamous Cell Carcinoma	Head and Neck	Primary	8.12032	0.589969	0.90205	2	NA	LTR/ERV1|HERVH-int~LTR7Y|4|182814310|182818919	chr4	182814870	182815488	*	*	NA	NA	NA
trans021b84f7e197814b	Ovarian Serous Cystadenocarcinoma	Ovary	Primary	7.54656	0.439493	0.532111	4	MRPS12	LTR/ERVL-MaLR|MLT1L|19|38926112|38926166	chr19	38926087	38932972	+	+	ENSG00000128626.11	protein_coding	protein_coding
transa52aeb76321aef2a	Lung Squamous Cell Carcinoma	Lung	Primary	0.832338	0	0	5	GABRQ	LTR/ERVL-MaLR|MLT1F2|X|152574626|152575149	chrX	152574699	152698770	*	+	ENSG00000268089.2	protein_coding	protein_coding
trans2785fe15df551272	Glioblastoma Multiforme	Brain	Primary	15.6605	3.07237	4.81694	10	NETO2	LTR/ERV1|LTR12E|16|47143725|47143941	chr16	47080803	47144035	-	-	ENSG00000171208.9	protein_coding	protein_coding
trans2eb9bb46c5afa014	Skin Cutaneous Melanoma	Skin	Primary	7.14376	0.335928	0.217687	2	NA	LTR/ERVL-MaLR|MSTA|GL000009.2|61237|61571	chr14_GL000009v2_random	59758	61237	*	*	NA	NA	NA
trans518b0c5887402471	Lung Squamous Cell Carcinoma	Lung	Primary	29.6302	7.42558	6.30124	14	AC046143.3	LTR/ERVL-MaLR|MSTA|3|194640771|194641132	chr3	194640794	194672517	-	-	ENSG00000229334.1	antisense	antisense
transe86a3d4c74b9112c	Esophageal Carcinoma	Esophagus	Primary	6.69778	0.221498	0.189603	3	EPB41L5	LTR/ERVL-MaLR|MLT1F2|2|120170225|120170783	chr2	120166618	120216532	*	*	ENSG00000115109.13	protein_coding	protein_coding
trans014c62f8959e7133	Esophageal Carcinoma	Esophagus	Primary	9.24926	0.909286	1.60633	3	POMK	LTR/ERV1|LTR76|8|43124520|43125207	chr8	43118932	43125284	*	*	ENSG00000185900.9	protein_coding	protein_coding
trans84c4feb0da4e5f89	Uveal Melanoma	Eye	Primary	12.0855	1.72521	NA	4	C12orf76	LTR/ERV1|LTR2B|12|110049152|110049299;LTR/ERV1|LTR7B|12|110049329|110049773;LTR/ERV1|LTR2B|12|110049774|110050113;LTR/ERV1|MER41A~PRIMA41-int|12|110050344|110050971;LTR/ERVL-MaLR|MLT1K|12|110067692|110067929	chr12	110042437	110067962	-	-	ENSG00000174456.13	protein_coding	protein_coding
trans0617f13857062d55	Lymphoid Neoplasm Diffuse Large B-cell Lymphoma	Lymph Nodes	Primary	10.5245	1.27226	2.27245	9	AAMDC	LTR/ERVL-MaLR|MLT1J|11|77917800|77918149	chr11	77878722	77918202	-	-	ENSG00000087884.14	protein_coding	protein_coding
transd9fb72d0bcba1075	Ovarian Serous Cystadenocarcinoma	Ovary	Primary	7.78099	0.51132	0.891305	6	ZDHHC20	LTR/ERVL|LTR16A|13|21435815|21436146	chr13	21374681	21439382	*	*	ENSG00000180776.15	protein_coding	protein_coding
transca5b04a01f61b070	Uveal Melanoma	Eye	Primary	5.79537	0	NA	14	ST3GAL6	LTR/ERV1|LTR10F|3|98713239|98713720;LTR/ERVL|MER74B|3|98713795|98714345;LTR/ERVL-MaLR|MLT1L|3|98715616|98715815;LTR/ERVL-MaLR|MLT1D|3|98718370|98718896	chr3	98713277	98795990	*	*	ENSG00000064225.12	protein_coding	protein_coding
trans0b2887d48f68dd2d	Testicular Germ Cell Tumors	Testis	Primary	5.9228	0.0321847	0	4	NA	LTR/ERV1|LTR7|14|48262396|48262802;LTR/ERV1|HERVH-int~LTR7|14|48263181|48268282	chr14	48262450	48274886	*	*	NA	NA	NA
trans06f2c3fa2cc8cffa	Glioblastoma Multiforme	Brain	Primary	14.1094	2.34063	4.55444	16	EVC	LTR/ERVL?|LTR89|4|5814158|5814404;LTR/ERVL-MaLR|THE1B|4|5817989|5818338	chr4	5813388	5888633	-	-	ENSG00000072840.12	protein_coding	protein_coding
transb9a3c58d33cbbcc9	Thyroid Carcinoma	Thyroid	Primary	9.19083	0.903177	0.0967111	5	RP11-476D10.1	LTR/ERVL-MaLR|MLT1F|12|40143974|40144501;LTR/Gypsy?|LTR85c|12|40158459|40158788	chr12	40141528	40158545	*	*	ENSG00000260943.1	lincRNA	lincRNA
transcd40d86cf8f8f327	Head and Neck Squamous Cell Carcinoma	Head and Neck	Primary	24.8293	5.83227	2.4656	5	RP4-620F22.2	LTR/ERVL-MaLR|THE1B|1|89257094|89257453;LTR/ERVL-MaLR|MLT1D|1|89257769|89257944;LTR/ERV1|LTR21B|1|89259774|89259994	chr1	89256190	89264790	-	-	ENSG00000237568.1	antisense	antisense
trans4c13e3d732b52ca4	Prostate Adenocarcinoma	Prostate	Primary	3.44265	0.116225	0.429114	2	NA	LTR/ERVL-MaLR|THE1C|2|180223989|180224359	chr2	180224203	180370064	*	*	NA	NA	NA
transb6600115bb03a9c3	Head and Neck Squamous Cell Carcinoma	Head and Neck	Primary	20.3879	4.3524	5.16302	10	MX1	LTR/ERV1|MER4CL34|21|41421877|41421982;LTR/ERV1|MER41A|21|41422024|41422448	chr21	41421967	41440919	+	+	ENSG00000157601.13	protein_coding	protein_coding
trans007de961699127fc	Cervical Squamous Cell Carcinoma and Endocervical Adenocarcinoma	Cervix	Primary	8.38769	0.68448	0	5	CXCL11	LTR/ERVL-MaLR|MLT1N2|4|76033093|76033323	chr4	76030246	76036185	-	-	ENSG00000169248.12	protein_coding	protein_coding
trans79c545abd56a379b	Brain Lower Grade Glioma	Brain	Primary	41.6215	12.2659	10.7553	31	PRRC2A	LTR/ERVL-MaLR|MLT1H1|6|31637886|31638291	chr6	31620669	31638137	+	+	ENSG00000204469.12	protein_coding	protein_coding
trans7230111a9021f1e3	Skin Cutaneous Melanoma	Skin	Primary	36.4133	9.91273	9.61915	22	ABHD12B	LTR/ERVL-MaLR|MLT1A0|14|50904682|50905016	chr14	50903009	50945155	-	-	ENSG00000131969.14	protein_coding	protein_coding
transae7c8f0f3d7608ea	Lymphoid Neoplasm Diffuse Large B-cell Lymphoma	Lymph Nodes	Primary	19.7072	4.13595	3.13097	6	PCED1B	LTR/ERV1|LTR8|12|47205794|47206481	chr12	47205899	47216507	-	-	ENSG00000179715.12	protein_coding	protein_coding
trans6cc9ffadaafba1a4	Pancreatic Adenocarcinoma	Pancreas	Primary	6.90257	0.28956	0.0273567	4	RP11-728F11.3	LTR/Gypsy|MamGypLTR3a|11|117819626|117820111	chr11	117815276	117830186	-	-	ENSG00000254844.4	antisense	antisense
transa487ae341b096acb	Esophageal Carcinoma	Esophagus	Primary	56.0261	17.2358	7.75868	5	IFI27	LTR/ERV1|MER65B|14|94109400|94109807	chr14	94109525	94116695	+	+	ENSG00000165949.12	protein_coding	protein_coding
trans7244bc60038d13ed	Cervical Squamous Cell Carcinoma and Endocervical Adenocarcinoma	Cervix	Primary	27.7798	6.86386	6.14952	3	PLAUR	LTR/ERV1|LTR19A|19|43648362|43648413	chr19	43648310	43655460	*	*	ENSG00000011422.11	protein_coding	protein_coding
transd90a000f4182f7df	Bladder Urothelial Carcinoma	Bladder	Primary	7.42195	0.428426	0.946664	3	CSAG3	LTR/ERVL|MLT2C2|X|152759220|152759498	chrX	152755193	152760215	*	*	ENSG00000268916.5	transcribed_processed_pseudogene	processed_transcript
trans319e6b295d0dee4c	Stomach Adenocarcinoma	Stomach	Primary	5.75761	0	0.0652159	3	SPIDR	LTR/ERVL-MaLR|MLT1G1|8|47734024|47734407	chr8	47727846	47735329	*	*	ENSG00000164808.16	protein_coding	protein_coding
trans5ee216fd7f1e339e	Testicular Germ Cell Tumors	Testis	Primary	13.2151	2.09238	2.61828	2	NA	LTR/ERVL-MaLR|MLT1O|1|62229850|62230283;LTR/ERV1|LTR8|1|62234475|62235157	chr1	62229752	62234824	*	*	NA	NA	NA
transb3d3f132f4beaf29	Cholangiocarcinoma	Bile Duct	Primary	14.7411	3.48837	0.659581	3	ZBTB45P2	LTR/ERVL-MaLR|MLT1D|2|110375884|110376267;LTR/ERV1?|LTR103_Mam|2|110376825|110377042	chr2	110375572	110385016	*	*	ENSG00000226065.1	processed_pseudogene	processed_pseudogene
transee740d2a96a4e7ee	Ovarian Serous Cystadenocarcinoma	Ovary	Primary	6.18679	0.111773	0	3	ZNF675	LTR/ERV1|HERVH-int~LTR7C|19|23549495|23555054;LTR/ERVK|HERVK22-int|19|23555115|23557849	chr19	23549663	23557872	*	*	ENSG00000197372.9	protein_coding	protein_coding
trans8183f33f7c758808	Uveal Melanoma	Eye	Primary	39.048	10.9223	NA	12	SNHG16	LTR/ERVL-MaLR|THE1B|17|76564566|76564680	chr17	76557774	76586405	*	*	ENSG00000163597.14	processed_transcript	lincRNA
trans4c4d1867e91f7fcc	Kidney Renal Clear Cell Carcinoma	Kidney	Primary	25.9863	0.0485242	0.069167	4	TTC21B-AS1	LTR/ERVL-MaLR|MLT1H|2|165933665|165934151;LTR/ERVL|LTR86A1|2|165947430|165947905	chr2	165933333	165950070	+	+	ENSG00000224490.5	processed_transcript	antisense
transc7fa2f3735e84ff3	Esophageal Carcinoma	Esophagus	Primary	5.73529	0	0.277366	2	NA	LTR/ERV1|HERVH-int~LTR7Y|1|68386004|68391994	chr1	68386093	68387300	*	*	NA	NA	NA
trans04dc9708e42bea96	Lung Squamous Cell Carcinoma	Lung	Primary	5.72603	0	0	3	NA	LTR/ERV1|HERVH-int~LTR7Y|5|136540943|136541750;LTR/ERV1|LTR7Y|5|136544966|136545393;LTR/ERV1|HERVH-int~LTR7Y|5|136546329|136547136	chr5	136540981	136546760	*	*	NA	NA	NA
trans9caf45508d165ddf	Glioblastoma Multiforme	Brain	Primary	8.96966	0.865514	2.7361	2	NA	LTR/ERVL-MaLR|MLT1J|4|78680662|78681055;LTR/Gypsy|MamGypLTR1a|4|78681102|78681338	chr4	78649606	78681368	*	*	NA	NA	NA
trans4d254a36cd5f15bd	Kidney Renal Clear Cell Carcinoma	Kidney	Primary	1.10075	0	0	2	RP4-764O22.1	LTR/ERVL|LTR67B|20|7069555|7069827	chr20	7069671	7071833	*	*	ENSG00000232271.1	lincRNA	lincRNA
trans4cfa900a955f15b9	Testicular Germ Cell Tumors	Testis	Primary	6.00434	0.074718	0.515642	2	RP11-1134I14.2	LTR/ERVK|LTR5_Hs|8|47176033|47176992	chr8	47171565	47176254	*	*	ENSG00000248347.3	unprocessed_pseudogene	unprocessed_pseudogene
trans50807bf79dbb216b	Kidney Renal Papillary Cell Carcinoma	Kidney	Primary	7.94482	0.589048	2.57927	12	CDH6	LTR/ERVL-MaLR|MLT1O|5|31191049|31191384	chr5	31190943	31325344	+	+	ENSG00000113361.12	protein_coding	protein_coding
transaf19d95a87721c33	Prostate Adenocarcinoma	Prostate	Primary	8.33116	0.696797	2.09496	2	CPNE4	LTR/ERVL|LTR33|3|132259705|132260166	chr3	132253229	132259807	*	*	ENSG00000196353.11	protein_coding	protein_coding
transfff8ab341d1c636f	Testicular Germ Cell Tumors	Testis	Primary	6.7729	0.27741	0.32407	2	RP11-146I2.1	LTR/ERV1|LTR2|6|14976167|14976632	chr6	14976209	14980380	*	*	ENSG00000234261.3	lincRNA	lincRNA
transb584031d03486d88	Prostate Adenocarcinoma	Prostate	Primary	7.1197	0.369384	1.91353	5	DRAIC	LTR/ERV1|LTR48B|15|69570551|69570782	chr15	69562378	69570766	+	+	ENSG00000245750.7	lincRNA	lincRNA
trans3029e562e2dd6f3e	Glioblastoma Multiforme	Brain	Primary	33.9028	9.20187	6.79622	15	ADGRG1	LTR/ERV1|LTR78B|16|57665497|57666359	chr16	57628705	57665571	+	+	ENSG00000205336.11	protein_coding	protein_coding
trans6d0b1d09afb494c5	Kidney Renal Clear Cell Carcinoma	Kidney	Primary	7.5347	0.494156	0.229318	3	LINC01235	LTR/ERVL-MaLR|MLT1I|9|13408164|13408519	chr9	13406154	13433031	-	-	ENSG00000270547.5	lincRNA	lincRNA
trans0637729723453729	Uterine Corpus Endometrial Carcinoma	Uterus	Primary	5.65096	0.143133	0	2	YWHAZ	LTR/ERV1|MER34B-int|8|100919659|100920019	chr8	100919656	100920205	*	*	ENSG00000164924.17	protein_coding	protein_coding
trans52c39b2df298b4bb	Brain Lower Grade Glioma	Brain	Primary	30.1471	7.86589	6.83885	5	LINC01088	LTR/ERVL|LTR79|4|79085924|79086311	chr4	78971530	79308735	+	+	ENSG00000249307.5	antisense	antisense
trans4d262d3f53246986	Testicular Germ Cell Tumors	Testis	Primary	7.00555	0	0	2	NA	LTR/ERV1|HERVH-int~LTR7|6|21361492|21367257	chr6	21361617	21367135	*	*	NA	NA	NA
trans2c5a02ebcafc0b37	Skin Cutaneous Melanoma	Skin	Primary	5.54004	0.0821026	0.0930564	10	GPR143	LTR/ERVL-MaLR|MLT1N2|X|9722657|9723192	chrX	9722848	9766070	-	-	ENSG00000101850.12	protein_coding	protein_coding
trans77460cec2ccec997	Cervical Squamous Cell Carcinoma and Endocervical Adenocarcinoma	Cervix	Primary	9.79291	1.13932	1.84346	12	CYP4X1	LTR/ERV1|MER51B|1|47003947|47004346;LTR/ERVL-MaLR|MSTB-int|1|47004347|47004383	chr1	47003964	47050750	+	+	ENSG00000186377.7	protein_coding	protein_coding
trans39384efa0d7226d1	Testicular Germ Cell Tumors	Testis	Primary	5.62985	0	0.0859731	2	FOXP2	LTR/ERVL-MaLR|MLT1G1|7|114368854|114369314	chr7	114369207	114371895	*	*	ENSG00000128573.23	protein_coding	protein_coding
transd7b4d923a6dffc8f	Skin Cutaneous Melanoma	Skin	Primary	64.9034	0.577862	1.03246	9	GPR143	LTR/ERVL|LTR102_Mam|X|9778126|9778589	chrX	9725550	9778672	-	-	ENSG00000101850.12	protein_coding	protein_coding
transde8eb4e6b7337024	Kidney Renal Clear Cell Carcinoma	Kidney	Primary	6.41114	0.206546	0.256848	2	NA	LTR/ERV1|HERVH-int~LTR7|3|187466298|187472000	chr3	187466340	187470169	*	*	NA	NA	NA
transd7b4d923a6dffc8f	Uveal Melanoma	Eye	Primary	109.038	0.577862	NA	9	GPR143	LTR/ERVL|LTR102_Mam|X|9778126|9778589	chrX	9725550	9778672	-	-	ENSG00000101850.12	protein_coding	protein_coding
trans376eb3a67340ea7b	Rectum Adenocarcinoma	Colorectal	Primary	6.87811	1.39942	2.2683	7	GPR35	LTR/ERVL-MaLR|MLT1F2|2|240616629|240617424;LTR/ERVL-MaLR|THE1D~THE1D-int|2|240632830|240635109	chr2	240598989	240632875	+	+	ENSG00000178623.11	protein_coding	protein_coding
trans83198a2952d21aa0	Glioblastoma Multiforme	Brain	Primary	14.3073	2.54128	3.74252	14	ADGRG1	LTR/ERV1|LTR78B|16|57665497|57666359	chr16	57628176	57665571	+	+	ENSG00000205336.11	protein_coding	protein_coding
transbe3d32c4c2be8b31	Testicular Germ Cell Tumors	Testis	Primary	11.2854	1.60593	1.15976	2	CTD-2291D10.4	LTR/ERV1|MER61-int|19|23103179|23104028	chr19	23094934	23103483	*	*	ENSG00000267886.1	lincRNA	lincRNA
transf35e7571756f3733	Testicular Germ Cell Tumors	Testis	Primary	6.42148	0.216958	0.169289	2	RP11-217C7.1	LTR/ERVL-MaLR|THE1B~THE1B-int|4|166453596|166455874	chr4	166453410	166455819	*	*	ENSG00000249675.1	lincRNA	lincRNA
trans60323ca2b7de5b92	Ovarian Serous Cystadenocarcinoma	Ovary	Primary	6.55996	0.255032	0.879523	2	MGAT3	LTR/ERVL-MaLR|MLT1J|22|39490047|39490480	chr22	39457409	39492192	*	*	ENSG00000128268.11	protein_coding	protein_coding
transa290bc4413b7d4a2	Lung Squamous Cell Carcinoma	Lung	Primary	6.01234	0.114307	0.550437	2	U8	LTR/ERVL-MaLR|MSTA-int|10|5016141|5018153	chr10	5001580	5018023	*	*	ENSG00000239148.1	snoRNA	snoRNA
trans6249db24b7aeacf3	Rectum Adenocarcinoma	Colorectal	Primary	7.54618	1.17207	1.96093	8	PTPRO	LTR/ERVL-MaLR|MLT1O|12|15570973|15571195	chr12	15546216	15571281	+	+	ENSG00000151490.13	protein_coding	protein_coding
transd3cd6e9233a80f3f	Glioblastoma Multiforme	Brain	Primary	9.36796	1.04893	1.48327	10	INO80E	LTR/ERVL-MaLR|MLT1K|16|29992340|29992553	chr16	29992238	30005655	*	*	ENSG00000169592.14	protein_coding	protein_coding
trans4bb3c115ca73dac6	Breast Invasive Carcinoma	Breast	Primary	1.6408	0.275427	0.136195	65	VPS13B	LTR/ERV1|LTR23|8|99892051|99892180	chr8	99013022	99893659	*	*	ENSG00000132549.18	protein_coding	protein_coding
trans1cc7bcd9a2a31ff7	Glioblastoma Multiforme	Brain	Primary	25.0354	6.20177	1.42904	2	C21orf62	LTR/ERV1|MER41B|21|32790588|32790778	chr21	32790674	32792972	*	*	ENSG00000205929.9	protein_coding	protein_coding
transc07e38fdc3c254a1	Lung Adenocarcinoma	Lung	Primary	6.59053	0.351835	0.108145	3	NA	LTR/ERVL|LTR16E1|5|79801267|79801695	chr5	79801651	79842666	*	*	NA	NA	NA
trans24754576501adf1f	Testicular Germ Cell Tumors	Testis	Primary	5.54207	0	0.098514	3	NA	LTR/ERV1|HERVH-int~LTR7|6|115032818|115037619	chr6	115036786	115037270	*	*	NA	NA	NA
trans4e82446e7a463a60	Uveal Melanoma	Eye	Primary	13.7755	0.148599	NA	2	RP11-318G21.4	LTR/ERV1|HERVH-int~LTR7|13|77933222|77939379	chr13	77939057	77939646	*	*	ENSG00000233379.1	lincRNA	lincRNA
trans6d05f842060e79c3	Pheochromocytoma and Paraganglioma	Adrenal Gland	Primary	5.53584	0	0.0671424	3	RP11-227F19.1	LTR/ERVL-MaLR|THE1B|4|41801391|41801546;LTR/ERVL-MaLR|THE1B|4|41801850|41802061	chr4	41798010	41801877	*	*	ENSG00000250467.1	antisense	antisense
trans5ac2577a28994e24	Pheochromocytoma and Paraganglioma	Adrenal Gland	Primary	21.5911	5.03164	4.80463e-05	4	MRAP2	LTR/ERV1|MER4A1|6|84087037|84087483	chr6	84055384	84090738	+	+	ENSG00000135324.5	protein_coding	protein_coding
trans4e9b7ab62cb8c5d3	Pheochromocytoma and Paraganglioma	Adrenal Gland	Primary	118.681	1.14905	0.655655	1	CHRNA3	LTR/ERVL-MaLR|MLT1A0|15|78595690|78596031	chr15	78595311	78597176	*	*	ENSG00000080644.15	protein_coding	protein_coding
trans3ca042d45ee0fe3a	Liver Hepatocellular Carcinoma	Liver	Primary	6.4495	0.245952	1.44322	2	NA	LTR/ERV1|HERV9-int~LTR12C|1|154670567|154677247;LTR/ERV1|LTR12E|1|154677855|154679190	chr1	154671814	154678114	*	*	NA	NA	NA
transe3ac49c6bf1a0de6	Testicular Germ Cell Tumors	Testis	Primary	5.50982	0	0	2	NA	LTR/ERV1|HERVH-int~LTR7Y|13|66141330|66147036	chr13	66141338	66146636	*	*	NA	NA	NA
trans4f6f00041c410162	Kidney Renal Clear Cell Carcinoma	Kidney	Primary	1.84938	0	0	2	NA	LTR/ERVL-MaLR|MSTA|10|109254082|109254480	chr10	109247525	109254170	*	*	NA	NA	NA
trans455b7de858e559f1	Glioblastoma Multiforme	Brain	Primary	7.03227	0.410353	1.98496	2	HSPA9	LTR/ERVL|MLT2B1|5|138553767|138554104;LTR/ERVL-MaLR|MLT1L|5|138554667|138555010	chr5	138550888	138555070	*	*	ENSG00000113013.12	protein_coding	protein_coding
trans319e6b295d0dee4c	Ovarian Serous Cystadenocarcinoma	Ovary	Primary	5.50041	0	6.26557e-08	3	SPIDR	LTR/ERVL-MaLR|MLT1G1|8|47734024|47734407	chr8	47727846	47735329	*	*	ENSG00000164808.16	protein_coding	protein_coding
trans2fb57dcec24d7c7b	Testicular Germ Cell Tumors	Testis	Primary	5.63464	0.036693	0.220695	2	AC009406.2	LTR/ERV1|HERVH-int~LTR7Y|2|57193026|57198696	chr2	57193111	57198667	*	*	ENSG00000277884.1	miRNA	miRNA
trans34994a6cd35ec0a3	Rectum Adenocarcinoma	Colorectal	Primary	7.5303	0.585361	1.27959	6	GABRB1	LTR/Gypsy?|LTR88b|4|47094853|47095566	chr4	47094937	47187755	*	*	ENSG00000163288.13	protein_coding	protein_coding
trans4f83d185670ebea3	Colon Adenocarcinoma	Colorectal	Primary	1.06027	0	0	3	AC007099.1	LTR/ERVL-MaLR|THE1C|2|75523868|75524219;LTR/ERVL-MaLR|THE1B|2|75541926|75542291	chr2	75524002	75542236	+	+	ENSG00000231172.2	antisense	antisense
trans7e79009e04c6bdf5	Mesothelioma	Pleura	Primary	9.07351	1.00271	NA	3	MSLN	LTR/ERVL|MER54B|16|760973|761306	chr16	760702	763277	+	+	ENSG00000102854.14	protein_coding	protein_coding
trans4f83d185670ebea3	Rectum Adenocarcinoma	Colorectal	Primary	0.665867	0	0	3	AC007099.1	LTR/ERVL-MaLR|THE1C|2|75523868|75524219;LTR/ERVL-MaLR|THE1B|2|75541926|75542291	chr2	75524002	75542236	+	+	ENSG00000231172.2	antisense	antisense
trans49161bde51040d73	Thymoma	Thymus	Primary	8.17587	0.743027	0.906999	2	EVL	LTR/ERVL-MaLR|MLT1A|14|100052808|100053194	chr14	100052855	100074936	*	*	ENSG00000196405.12	protein_coding	protein_coding
transdd91f2f8c3e8470d	Testicular Germ Cell Tumors	Testis	Primary	34.1355	9.62819	9.46346	8	ZBTB8OS	LTR/ERV1|MER67B|1|32636720|32637249	chr1	32621835	32639151	-	-	ENSG00000176261.15	protein_coding	protein_coding
trans49b9065b43859c15	Thymoma	Thymus	Primary	15.6758	4.39644	4.79379	3	ABRACL	LTR/ERVL-MaLR|MLT1M|6|139027529|139028142	chr6	139027291	139043302	+	+	ENSG00000146386.7	protein_coding	protein_coding
trans9020167bba2a3e3a	Uveal Melanoma	Eye	Primary	5.47231	0	NA	6	LTB4R2	LTR/ERVL|LTR16C|14|24309153|24309369	chr14	24309255	24342852	*	*	ENSG00000213906.9	protein_coding	protein_coding
trans4d107f043b9bbfbd	Prostate Adenocarcinoma	Prostate	Primary	7.17177	0.460764	1.6676	2	CPNE4	LTR/ERVL|MLT2B4|3|132233770|132234357;LTR/ERVL|MLT2F|3|132238216|132238812	chr3	132227961	132239371	*	*	ENSG00000196353.11	protein_coding	protein_coding
trans353b4310f5154f27	Pheochromocytoma and Paraganglioma	Adrenal Gland	Primary	14.908	2.83223	1.24587	2	NA	LTR/ERVL-MaLR|MLT1H|7|149887657|149887705;LTR/ERVL-MaLR|THE1A|7|149887706|149888057;LTR/ERVL-MaLR|MLT1H|7|149888058|149888163	chr7	149887178	149888989	*	*	NA	NA	NA
transdabb456e5e01331a	Kidney Renal Papillary Cell Carcinoma	Kidney	Primary	5.97592	0.135298	1.52777	5	CTSL3P	LTR/ERVL-MaLR|MSTC|9|87781053|87781471	chr9	87773216	87787536	*	*	ENSG00000188029.8	transcribed_unprocessed_pseudogene	transcribed_unprocessed_pseudogene
trans2fd827f17dccfdb0	Lymphoid Neoplasm Diffuse Large B-cell Lymphoma	Lymph Nodes	Primary	11.2456	1.67174	3.29972	2	RP4-620F22.2	LTR/ERV1|LTR12C|1|89272453|89273890	chr1	89269385	89272931	*	*	ENSG00000237568.1	antisense	antisense
trans9b8b83407187c8b7	Brain Lower Grade Glioma	Brain	Primary	7.1911	0.470411	0.998109	14	ADGRG1	LTR/ERV1|LTR78B|16|57665497|57666359	chr16	57639086	57665571	+	+	ENSG00000205336.11	protein_coding	protein_coding
trans4ff880afa2612744	Skin Cutaneous Melanoma	Skin	Primary	1.8135	0.07173	0	4	C12orf76	LTR/ERV1|LTR8|12|110055530|110055953	chr12	110055474	110073725	-	-	ENSG00000174456.13	protein_coding	protein_coding
trans0d03dc018eb0360e	Lymphoid Neoplasm Diffuse Large B-cell Lymphoma	Lymph Nodes	Primary	11.8723	1.87139	0.467393	2	NA	LTR/ERVL-MaLR|MLT1K|16|21391499|21391604	chr16	21391415	21393819	*	*	NA	NA	NA
trans4ff880afa2612744	Uveal Melanoma	Eye	Primary	7.14736	0.07173	NA	4	C12orf76	LTR/ERV1|LTR8|12|110055530|110055953	chr12	110055474	110073725	-	-	ENSG00000174456.13	protein_coding	protein_coding
trans1e405d1c71656956	Ovarian Serous Cystadenocarcinoma	Ovary	Primary	18.8744	4.18135	0.293094	16	MSLN	LTR/ERVL|MER54B|16|760973|761306	chr16	761152	768861	+	+	ENSG00000102854.14	protein_coding	protein_coding
trans74bf957bb864f247	Esophageal Carcinoma	Esophagus	Primary	15.9741	3.20404	1.26843	7	DNAJC15	LTR/ERV1|HERVH-int~LTR7B|13|43059672|43061604;LTR/ERVL|LTR33|13|43062026|43062495	chr13	43059695	43107547	+	+	ENSG00000120675.5	protein_coding	protein_coding
trans501750811b4af3bd	Colon Adenocarcinoma	Colorectal	Primary	1.4014	0	0	5	AC018359.1	LTR/ERVL-MaLR|THE1D|3|34184557|34184932;LTR/ERVL|LTR16A|3|34189048|34189460;LTR/ERVL-MaLR|MLT1B|3|34190732|34191083	chr3	34184746	34190747	*	*	ENSG00000226320.5	lincRNA	lincRNA
trans501750811b4af3bd	Rectum Adenocarcinoma	Colorectal	Primary	2.25922	0	0	5	AC018359.1	LTR/ERVL-MaLR|THE1D|3|34184557|34184932;LTR/ERVL|LTR16A|3|34189048|34189460;LTR/ERVL-MaLR|MLT1B|3|34190732|34191083	chr3	34184746	34190747	*	*	ENSG00000226320.5	lincRNA	lincRNA
transf4fba5f55d0c6673	Skin Cutaneous Melanoma	Skin	Primary	10.6256	1.49213	0.282009	7	RNF219-AS1	LTR/ERVL-MaLR|THE1B|13|77924679|77925036	chr13	77895487	77925271	-	-	ENSG00000234377.7	antisense	antisense
trans9591835f73742232	Lymphoid Neoplasm Diffuse Large B-cell Lymphoma	Lymph Nodes	Primary	6.72353	0.350793	1.70941	4	RP4-620F22.2	LTR/ERV1|LTR12C|1|89272453|89273890	chr1	89269386	89274143	*	*	ENSG00000237568.1	antisense	antisense
trans27063c5a07b96a60	Testicular Germ Cell Tumors	Testis	Primary	6.99395	0.428419	0.600218	3	RP11-121M22.1	LTR/ERVL-MaLR|MLT1K|11|130370332|130370871;LTR/ERVL|LTR32|11|130379064|130379518;LTR/ERV1|MER72|11|130379582|130380163	chr11	130370383	130379783	*	*	ENSG00000175773.12	lincRNA	lincRNA
trans34be7aa7e0adb3ea	Testicular Germ Cell Tumors	Testis	Primary	7.61714	0.605857	0.720984	2	UMPS	LTR/Gypsy|MamGypLTR2b|3|124748521|124749280	chr3	124744662	124749237	*	*	ENSG00000114491.13	protein_coding	protein_coding
trans502962f21ad8fe89	Testicular Germ Cell Tumors	Testis	Primary	15.7933	0	0	2	NA	LTR/ERV1|HERVH-int~LTR7|11|94345725|94351415;LTR/ERV1|HERVH-int~LTR7|11|94351418|94355534	chr11	94350469	94354842	*	*	NA	NA	NA
trans504b8e4cff9275e1	Testicular Germ Cell Tumors	Testis	Primary	1.85686	0	0	2	LINC00371	LTR/ERV1|HERVH-int~LTR7|13|51169866|51175006	chr13	51170648	51171472	*	*	ENSG00000226792.6	lincRNA	lincRNA
transa24065763a5c83d0	Lung Adenocarcinoma	Lung	Primary	35.9775	10.4661	0.300762	5	SPINK1	LTR/ERVL-MaLR|THE1C|5|147839015|147839391	chr5	147824582	147839249	-	-	ENSG00000164266.10	protein_coding	protein_coding
trans14fc6d5194ed0774	Kidney Renal Clear Cell Carcinoma	Kidney	Primary	19.2014	4.34587	1.08753	9	ANGPTL4	LTR/ERV1|LTR12C|19|8375578|8377019	chr19	8364143	8390701	*	*	ENSG00000167772.11	protein_coding	protein_coding
transb5ce92a5623f513f	Kidney Renal Clear Cell Carcinoma	Kidney	Primary	5.38757	0	0	2	NA	LTR/ERV1|LTR12C|14|91577778|91579391	chr14	91578374	91578792	*	*	NA	NA	NA
trans5066cc26c1bef25e	Esophageal Carcinoma	Esophagus	Primary	1.19996	0.0776285	0.186139	1	FNDC3B	LTR/ERV1|LTR2752|3|172207532|172207670	chr3	172206689	172207696	*	*	ENSG00000075420.12	protein_coding	protein_coding
trans7244bc60038d13ed	Mesothelioma	Pleura	Primary	26.217	6.86386	NA	3	PLAUR	LTR/ERV1|LTR19A|19|43648362|43648413	chr19	43648310	43655460	*	*	ENSG00000011422.11	protein_coding	protein_coding
trans53584133f57493d6	Skin Cutaneous Melanoma	Skin	Primary	9.1502	1.07326	1.37527	3	GAPLINC	LTR/ERVL-MaLR|MLT1K|18|3478481|3479033	chr18	3466079	3478976	+	+	ENSG00000266835.5	lincRNA	lincRNA
trans6f462df3b07a34e3	Testicular Germ Cell Tumors	Testis	Primary	5.58704	0.0556792	0.00947196	2	RP11-174G6.1	LTR/ERV1|HERVH-int~LTR7Y|12|14705419|14710640	chr12	14705876	14709506	*	*	ENSG00000214772.2	antisense	antisense
transa2ecfef182323174	Testicular Germ Cell Tumors	Testis	Primary	7.45677	0.575363	0	2	ESRG	LTR/ERV1|HERVH-int~LTR7|3|54634484|54640204	chr3	54639098	54639375	*	*	ENSG00000265992.1	sense_intronic	sense_intronic
transe0585a3f696d926c	Cervical Squamous Cell Carcinoma and Endocervical Adenocarcinoma	Cervix	Primary	14.5633	2.79461	2.37052	2	SPIN4-AS1	LTR/ERV1|MER57-int~MER57B1|X|63397946|63400323	chrX	63347229	63399904	*	*	ENSG00000233661.1	antisense	antisense
transf08eea9f85cb4f0e	Brain Lower Grade Glioma	Brain	Primary	7.16873	0.494597	1.6991	4	VAX2	LTR/ERVL|MER21C|2|70924184|70924336	chr2	70900547	70933443	+	+	ENSG00000116035.2	protein_coding	protein_coding
transd4a484b349c8ba3a	Pheochromocytoma and Paraganglioma	Adrenal Gland	Primary	6.50669	0.360166	0.42953	10	RPAIN	LTR/ERVL|MER21A|17|5439459|5439710;LTR/ERVL|MER21A|17|5439718|5440235;LTR/ERVL|MER21B|17|5440502|5440747	chr17	5419815	5440940	*	*	ENSG00000129197.14	protein_coding	protein_coding
trans8a0e6492e496644b	Sarcoma	Soft Tissue	Primary	19.5178	4.4921	NA	7	CYFIP2	LTR/ERV1|LTR39|5|157361812|157362609	chr5	157361878	157395659	*	*	ENSG00000055163.18	protein_coding	protein_coding
trans82c50752223923e6	Lung Squamous Cell Carcinoma	Lung	Primary	13.1429	0.34767	0.0580718	1	GNGT1	LTR/ERVL-MaLR|MLT1F2|7|93809703|93809986;LTR/ERVL-MaLR|MLT1H1|7|93811991|93812306;LTR/ERVL|LTR53-int|7|93812614|93813015;LTR/ERVL|LTR52~LTR52-int|7|93813643|93814071;LTR/ERVL|MLT2B1|7|93814072|93814459;LTR/ERVL|LTR52-int|7|93814460|93815654	chr7	93807645	93815689	*	+	ENSG00000127928.12	protein_coding	protein_coding
trans87af42e77873f060	Stomach Adenocarcinoma	Stomach	Primary	34.5251	10.0196	2.14197	4	CKS2	LTR/ERVL-MaLR|MLT1H|9|89304625|89304853;LTR/ERV1|MER41A|9|89308867|89309386	chr9	89304717	89316702	+	+	ENSG00000123975.4	protein_coding	protein_coding
trans508f588b66af73a9	Skin Cutaneous Melanoma	Skin	Primary	1.86815	0.0420835	0.0241256	2	LINC01317	LTR/ERVL-MaLR|THE1A|2|33706675|33707027;LTR/ERVL|LTR16|2|33708393|33708728	chr2	33706930	33709305	*	*	ENSG00000203386.6	lincRNA	lincRNA
trans62b230740dd24e11	Kidney Renal Clear Cell Carcinoma	Kidney	Primary	7.84755	0.27412	0.187956	5	HPCAL1	LTR/ERVL-MaLR|MLT1A|2|10388823|10388999;LTR/ERV1|MER66B|2|10389000|10389478;LTR/ERVL-MaLR|MLT1A|2|10389479|10389632	chr2	10388327	10428017	+	+	ENSG00000115756.12	protein_coding	protein_coding
trans81925211e04f7651	Pheochromocytoma and Paraganglioma	Adrenal Gland	Primary	19.41	4.48158	0.995391	11	SGCE	LTR/ERVL|ERVL-E-int|7|94583406|94585034	chr7	94584850	94656253	-	-	ENSG00000127990.15	protein_coding	protein_coding
transe15c0e28d426ce3e	Glioblastoma Multiforme	Brain	Primary	30.5078	8.52501	6.3494	14	GNG12-AS1	LTR?|MamRep605b|1|68121907|68122233	chr1	68099728	68232579	*	*	ENSG00000232284.7	antisense	antisense
transf1463958773c4946	Kidney Renal Clear Cell Carcinoma	Kidney	Primary	17.213	0.301182	0.182614	7	HPCAL1	LTR/ERV1|MER66B|2|10389000|10389478;LTR/ERVL-MaLR|MLT1A|2|10389479|10389632	chr2	10302776	10426955	+	+	ENSG00000115756.12	protein_coding	protein_coding
trans29da9870c72f77e8	Testicular Germ Cell Tumors	Testis	Primary	7.8837	0.718432	0.0105582	4	TPST2	LTR/ERVL|MER77|22|26525514|26525643	chr22	26518218	26528237	*	*	ENSG00000128294.15	protein_coding	protein_coding
transbee13067979c574d	Brain Lower Grade Glioma	Brain	Primary	6.26091	0.254931	0.998626	2	WDR11-AS1	LTR/ERVL|LTR40b|10|120762831|120763284	chr10	120762774	120776887	*	*	ENSG00000227165.7	antisense	antisense
trans83c07d5f9536f680	Breast Invasive Carcinoma	Breast	Primary	13.6213	2.5228	1.46538	4	COX6C	LTR/ERV1|LTR23|8|99892051|99892180	chr8	99884678	99893766	-	-	ENSG00000164919.10	protein_coding	protein_coding
transe63ccea43bef1b4d	Uterine Corpus Endometrial Carcinoma	Uterus	Primary	11.5478	2.2673	2.46014	2	LINC00665	LTR/ERV1|LTR6B|19|36324873|36325429;LTR/ERV1|HERVS71-int~LTR6B|19|36327346|36331043	chr19	36324894	36330997	*	*	ENSG00000232677.6	lincRNA	lincRNA
trans3114531fe26d22a4	Uterine Carcinosarcoma	Uterus	Primary	6.56637	0.380351	2.12798	5	PRCD	LTR/ERVL-MaLR|THE1B|17|76564566|76564680	chr17	76521670	76565347	*	*	ENSG00000214140.10	protein_coding	protein_coding
transfe7e1e130f63cfe3	Testicular Germ Cell Tumors	Testis	Primary	5.29566	0	0.511412	2	LINC01356	LTR/ERV1|HERVH-int~LTR7|1|112820139|112823232;LTR/ERV1|HERVH-int~LTR7|1|112823539|112826054	chr1	112820447	112823762	*	*	ENSG00000215866.7	lincRNA	lincRNA
trans49b9065b43859c15	Uterine Corpus Endometrial Carcinoma	Uterus	Primary	15.2094	4.39644	4.40929	3	ABRACL	LTR/ERVL-MaLR|MLT1M|6|139027529|139028142	chr6	139027291	139043302	+	+	ENSG00000146386.7	protein_coding	protein_coding
trans52ad15953f987a5a	Testicular Germ Cell Tumors	Testis	Primary	3.4185	0	0	2	NA	LTR/ERV1|HERVH-int~LTR7|1|215410129|215415683	chr1	215415089	215415683	*	*	NA	NA	NA
transfc18219aa0671c35	Cholangiocarcinoma	Bile Duct	Primary	20.7807	5.02276	0.00899654	2	ITIH5	LTR/ERVL-MaLR|MLT1A|10|7559625|7559844	chr10	7559271	7569160	*	*	ENSG00000123243.14	protein_coding	protein_coding
trans2903da809c78bbda	Skin Cutaneous Melanoma	Skin	Primary	7.70661	0.0466609	0.25759	4	HECTD2	LTR/ERV1|HERVH-int~LTR7|10|91301703|91307329;LTR/ERVL-MaLR|MLT1O|10|91307400|91307680	chr10	91306961	91575397	*	+	ENSG00000165338.16	protein_coding	protein_coding
trans836f24cb8faf3e05	Kidney Renal Clear Cell Carcinoma	Kidney	Primary	12.9729	2.3358	0.339203	2	UBE2D2	LTR/ERV1|LTR12C|5|139549171|139550957	chr5	139550230	139615386	*	*	ENSG00000131508.15	protein_coding	protein_coding
trans858a542c3969c241	Lung Squamous Cell Carcinoma	Lung	Primary	2.82827	0	0	3	IMPAD1	LTR/ERVL-MaLR|MLT1C|8|56977527|56977956	chr8	56961793	56977690	-	-	ENSG00000104331.8	protein_coding	protein_coding
trans8441f733a5385685	Kidney Renal Papillary Cell Carcinoma	Kidney	Primary	6.74747	0.406888	1.59634	3	UGT2B11	LTR/ERV1|Harlequin-int~LTR2B|4|69053326|69057338	chr4	69045935	69056692	*	*	ENSG00000213759.8	protein_coding	protein_coding
trans54013da3f863797e	Pheochromocytoma and Paraganglioma	Adrenal Gland	Primary	8.07357	0.797813	0.127404	6	CD163L1	LTR/ERVL-MaLR|THE1B|12|7370891|7371248	chr12	7355007	7370983	-	-	ENSG00000177675.8	protein_coding	protein_coding
transa19820cb26463192	Testicular Germ Cell Tumors	Testis	Primary	6.05584	0.214488	0.826756	4	UBA52P5	LTR/ERVL|LTR40b|8|123219212|123219704;LTR/ERVL-MaLR|THE1B|8|123238105|123238467	chr8	123219042	123238140	-	-	ENSG00000243498.2	processed_pseudogene	processed_pseudogene
trans23e680fbf472a142	Pheochromocytoma and Paraganglioma	Adrenal Gland	Primary	5.92676	0.178621	0.0597404	8	LINC00684	LTR/ERVL-MaLR|MLT1I|X|72871973|72872064	chrX	72872026	72943892	-	-	ENSG00000275520.1	lincRNA	lincRNA
transf42c942a087d1422	Glioblastoma Multiforme	Brain	Primary	12.7166	2.26177	1.93693	5	SUCO	LTR/ERV1|MER66-int~MER66B|1|172559421|172561663;LTR/ERV1|LOR1-int|1|172561666|172561941;LTR/ERV1|MER66-int|1|172561970|172562327	chr1	172532758	172562327	+	+	ENSG00000094975.13	protein_coding	protein_coding
trans43d4b3ab820bf44e	Esophageal Carcinoma	Esophagus	Primary	8.22452	0.844411	0.60325	2	FAM174A	LTR/Gypsy|MamGypLTR2c|5|100581230|100581327	chr5	100581186	100586788	*	*	ENSG00000174132.8	protein_coding	protein_coding
trans095f131b2be42942	Cholangiocarcinoma	Bile Duct	Primary	6.52226	0.346292	0.986814	2	NA	LTR/ERV1|MER41B|16|71548341|71548974	chr16	71544876	71549782	*	*	NA	NA	NA
transf5c90e79f664ddd7	Prostate Adenocarcinoma	Prostate	Primary	5.4013	0.0352503	1.26702	8	GLYATL1	LTR/ERVK|HERVK22-int~LTR22|11|58927116|58929132;LTR/ERV1|MER57-int~MER57A1|11|58943110|58944232	chr11	58927780	59053591	+	+	ENSG00000166840.13	protein_coding	protein_coding
transb5054af9d33dc069	Breast Invasive Carcinoma	Breast	Primary	5.96328	0.195219	1.57459	2	MLPH	LTR/ERV1|MER39B|2|237513894|237514258;LTR/ERV1|MER39B|2|237514400|237514660;LTR/ERVL|LTR50|2|237515523|237515991	chr2	237512707	237516943	*	*	ENSG00000115648.13	protein_coding	protein_coding
transcfd6e2c77ee7a5ac	Skin Cutaneous Melanoma	Skin	Primary	9.4339	1.22379	1.04307	17	STK32A	LTR/ERVL|ERVL-E-int|5|147201606|147202213	chr5	147184062	147387854	*	*	ENSG00000169302.14	protein_coding	protein_coding
transf191d37d3f2a8c96	Ovarian Serous Cystadenocarcinoma	Ovary	Primary	6.54383	0.363344	0	2	LYPLA2P3	LTR/ERV1|LTR2B|9|76956333|76956747;LTR/ERVL-MaLR|MLT1B|9|76988506|76988868	chr9	76956553	76989246	*	*	ENSG00000236604.1	processed_pseudogene	processed_pseudogene
trans533d6839e3a9d613	Testicular Germ Cell Tumors	Testis	Primary	2.77617	0.0108433	0.0246462	3	NA	LTR/ERV1|HERVH-int~LTR7Y|10|90294983|90300722	chr10	90296254	90300671	*	*	NA	NA	NA
trans65a2625ecac0407d	Kidney Renal Clear Cell Carcinoma	Kidney	Primary	6.28951	0.291591	0.0886102	3	NA	LTR/ERVL-MaLR|MLT1F2|15|101604875|101605111	chr15	101603664	101611498	*	*	NA	NA	NA
trans4987c894b9ce95a4	Testicular Germ Cell Tumors	Testis	Primary	5.79838	0.153743	0.158123	3	NA	LTR/ERV1|MER4-int|1|45320709|45321396;LTR/ERV1|LTR7|1|45321633|45322007;LTR/ERVK|MER9a1|1|45322286|45322586	chr1	45309497	45322511	*	*	NA	NA	NA
trans319a8ad80f03f9cb	Testicular Germ Cell Tumors	Testis	Primary	6.45492	0.339484	0.708679	2	NA	LTR/ERV1|LTR6B|4|175473046|175473316;LTR/ERV1|LTR6B|4|175473620|175473916	chr4	175473264	175473916	*	*	NA	NA	NA
transe7d82d560e3fb880	Testicular Germ Cell Tumors	Testis	Primary	5.5359	0.0821917	0.165143	3	NA	LTR/ERVL-MaLR|MLT1I|3|50519360|50519738;LTR/ERVK|LTR5_Hs|3|50519892|50520848	chr3	50518072	50520249	*	*	NA	NA	NA
trans94e9109abc550474	Kidney Renal Papillary Cell Carcinoma	Kidney	Primary	6.8186	0.447943	1.34779	2	ERVH-1	LTR/ERV1|HERVH-int~LTR7|4|23722873|23726866	chr4	23722934	23727302	*	*	ENSG00000251292.1	lincRNA	lincRNA
trans05b0924469c3296b	Mesothelioma	Pleura	Primary	16.8669	3.70936	NA	3	PIEZO2	LTR/ERVL-MaLR|THE1B|18|10675686|10676055	chr18	10670603	10676113	-	-	ENSG00000154864.11	protein_coding	protein_coding
trans534a4eca9d4aea93	Lung Squamous Cell Carcinoma	Lung	Primary	5.06195	0.0419669	0.0443277	3	U8	LTR/ERVL-MaLR|MLT1L|10|5010339|5010697;LTR/ERVL-MaLR|MSTA-int|10|5016141|5018153	chr10	5001633	5018055	*	*	ENSG00000239148.1	snoRNA	snoRNA
trans700588a17c934b2f	Testicular Germ Cell Tumors	Testis	Primary	6.12145	0.249391	0.901306	2	A2ML1-AS2	LTR/ERV1|LTR8|12|8820159|8820429;LTR/ERV1|LTR8|12|8820734|8821194	chr12	8820271	8821043	*	*	ENSG00000256904.1	antisense	antisense
trans35e442bcbdf16ec8	Head and Neck Squamous Cell Carcinoma	Head and Neck	Primary	7.24682	0.576558	0.866783	5	CXCL11	LTR/ERVL-MaLR|MLT1N2|4|76033093|76033323	chr4	76030239	76036183	-	-	ENSG00000169248.12	protein_coding	protein_coding
transf4f7c999e2640e53	Skin Cutaneous Melanoma	Skin	Primary	8.13984	0.852195	0.391836	2	NA	LTR/ERVL-MaLR|MSTA|KI270706.1|64349|64638;LTR/ERVL-MaLR|MSTA|KI270706.1|66131|66477	chr1_KI270706v1_random	64296	67051	*	*	NA	NA	NA
transb8ea01d8961dcaf2	Testicular Germ Cell Tumors	Testis	Primary	6.00464	0.224488	1.12442	2	LINC01356	LTR/ERV1|HERVH-int~LTR7|1|112820139|112823232;LTR/ERV1|HERVH-int~LTR7|1|112823539|112826054	chr1	112822864	112823603	*	*	ENSG00000215866.7	lincRNA	lincRNA
transecedcf07890169d4	Testicular Germ Cell Tumors	Testis	Primary	50.3157	16.6852	11.2499	5	TAF13	LTR/ERVL-MaLR|MLT1F2|1|109078305|109078781	chr1	109064182	109078527	-	-	ENSG00000197780.9	protein_coding	protein_coding
trans033b8069d66519dc	Kidney Renal Clear Cell Carcinoma	Kidney	Primary	5.19032	0	0.480602	2	NA	LTR/ERV1|HERV9-int~LTR12C|11|101230104|101241804	chr11	101230831	101231154	*	*	NA	NA	NA
trans65b2855288b7a483	Testicular Germ Cell Tumors	Testis	Primary	43.0453	13.7535	10.184	5	OIP5-AS1	LTR/ERV1|LTR7|15|41285322|41285686	chr15	41283962	41299078	+	+	ENSG00000247556.6	processed_transcript	antisense
trans8392f16bb0af3eae	Uveal Melanoma	Eye	Primary	6.07005	0.251543	NA	3	NA	LTR/ERVL-MaLR|MLT1J|12|84988711|84989067	chr12	84986756	84994975	*	*	NA	NA	NA
transed1e06042d545149	Cholangiocarcinoma	Bile Duct	Primary	7.72468	1.70253	0.0896	2	TLDC2	LTR/ERVL|LTR33A|20|36893775|36894190	chr20	36893045	36902822	*	*	ENSG00000101342.9	protein_coding	protein_coding
transeb78772890b2c24b	Kidney Renal Clear Cell Carcinoma	Kidney	Primary	7.93884	0.805356	0.135259	2	UBE2D2	LTR/ERV1|Harlequin-int~LTR2B|5|139526721|139531564	chr5	139527010	139527587	*	*	ENSG00000131508.15	protein_coding	protein_coding
trans7d277fcf39e4f2ac	Liver Hepatocellular Carcinoma	Liver	Primary	22.0323	5.64097	5.21983	4	AMACR	LTR/ERVL|LTR33A|5|33986535|33986963;LTR/ERVL-MaLR|MLT1L|5|33988059|33988546	chr5	33986200	34008146	-	-	ENSG00000242110.7	protein_coding	protein_coding
[truncated: 9,940 more rows]

## Sheet: Supplemental_Table_S5
Supplemental_Table_S5. Overlap of CLTs with known examples of LTR element exaptation in the expression of oncogenes and cancer-associated lncRNAs
[truncated: 30 more rows]

## Sheet: Supplemental_Table_S6
Supplemental_Table_S6. Peptides identified independently by Mascot and PEAKS in the PXD004894 dataset (identical peptides identified in separate samples are listed in separated rows).
[truncated: 38 more rows]

[truncated: 2 more sheets: Supplemental_Table_S7, Supplemental_Table_S8]
